# Supplementary material for: Transcriptome analysis of adult Caenorhabditis elegans cells reveals tissue-specific gene and isoform expression
Source: PubMed Central journal article supplement (PMC6105014; doi:10.1371/journal.pgen.1007559), 2018-08-10

A

## nervous system tissues

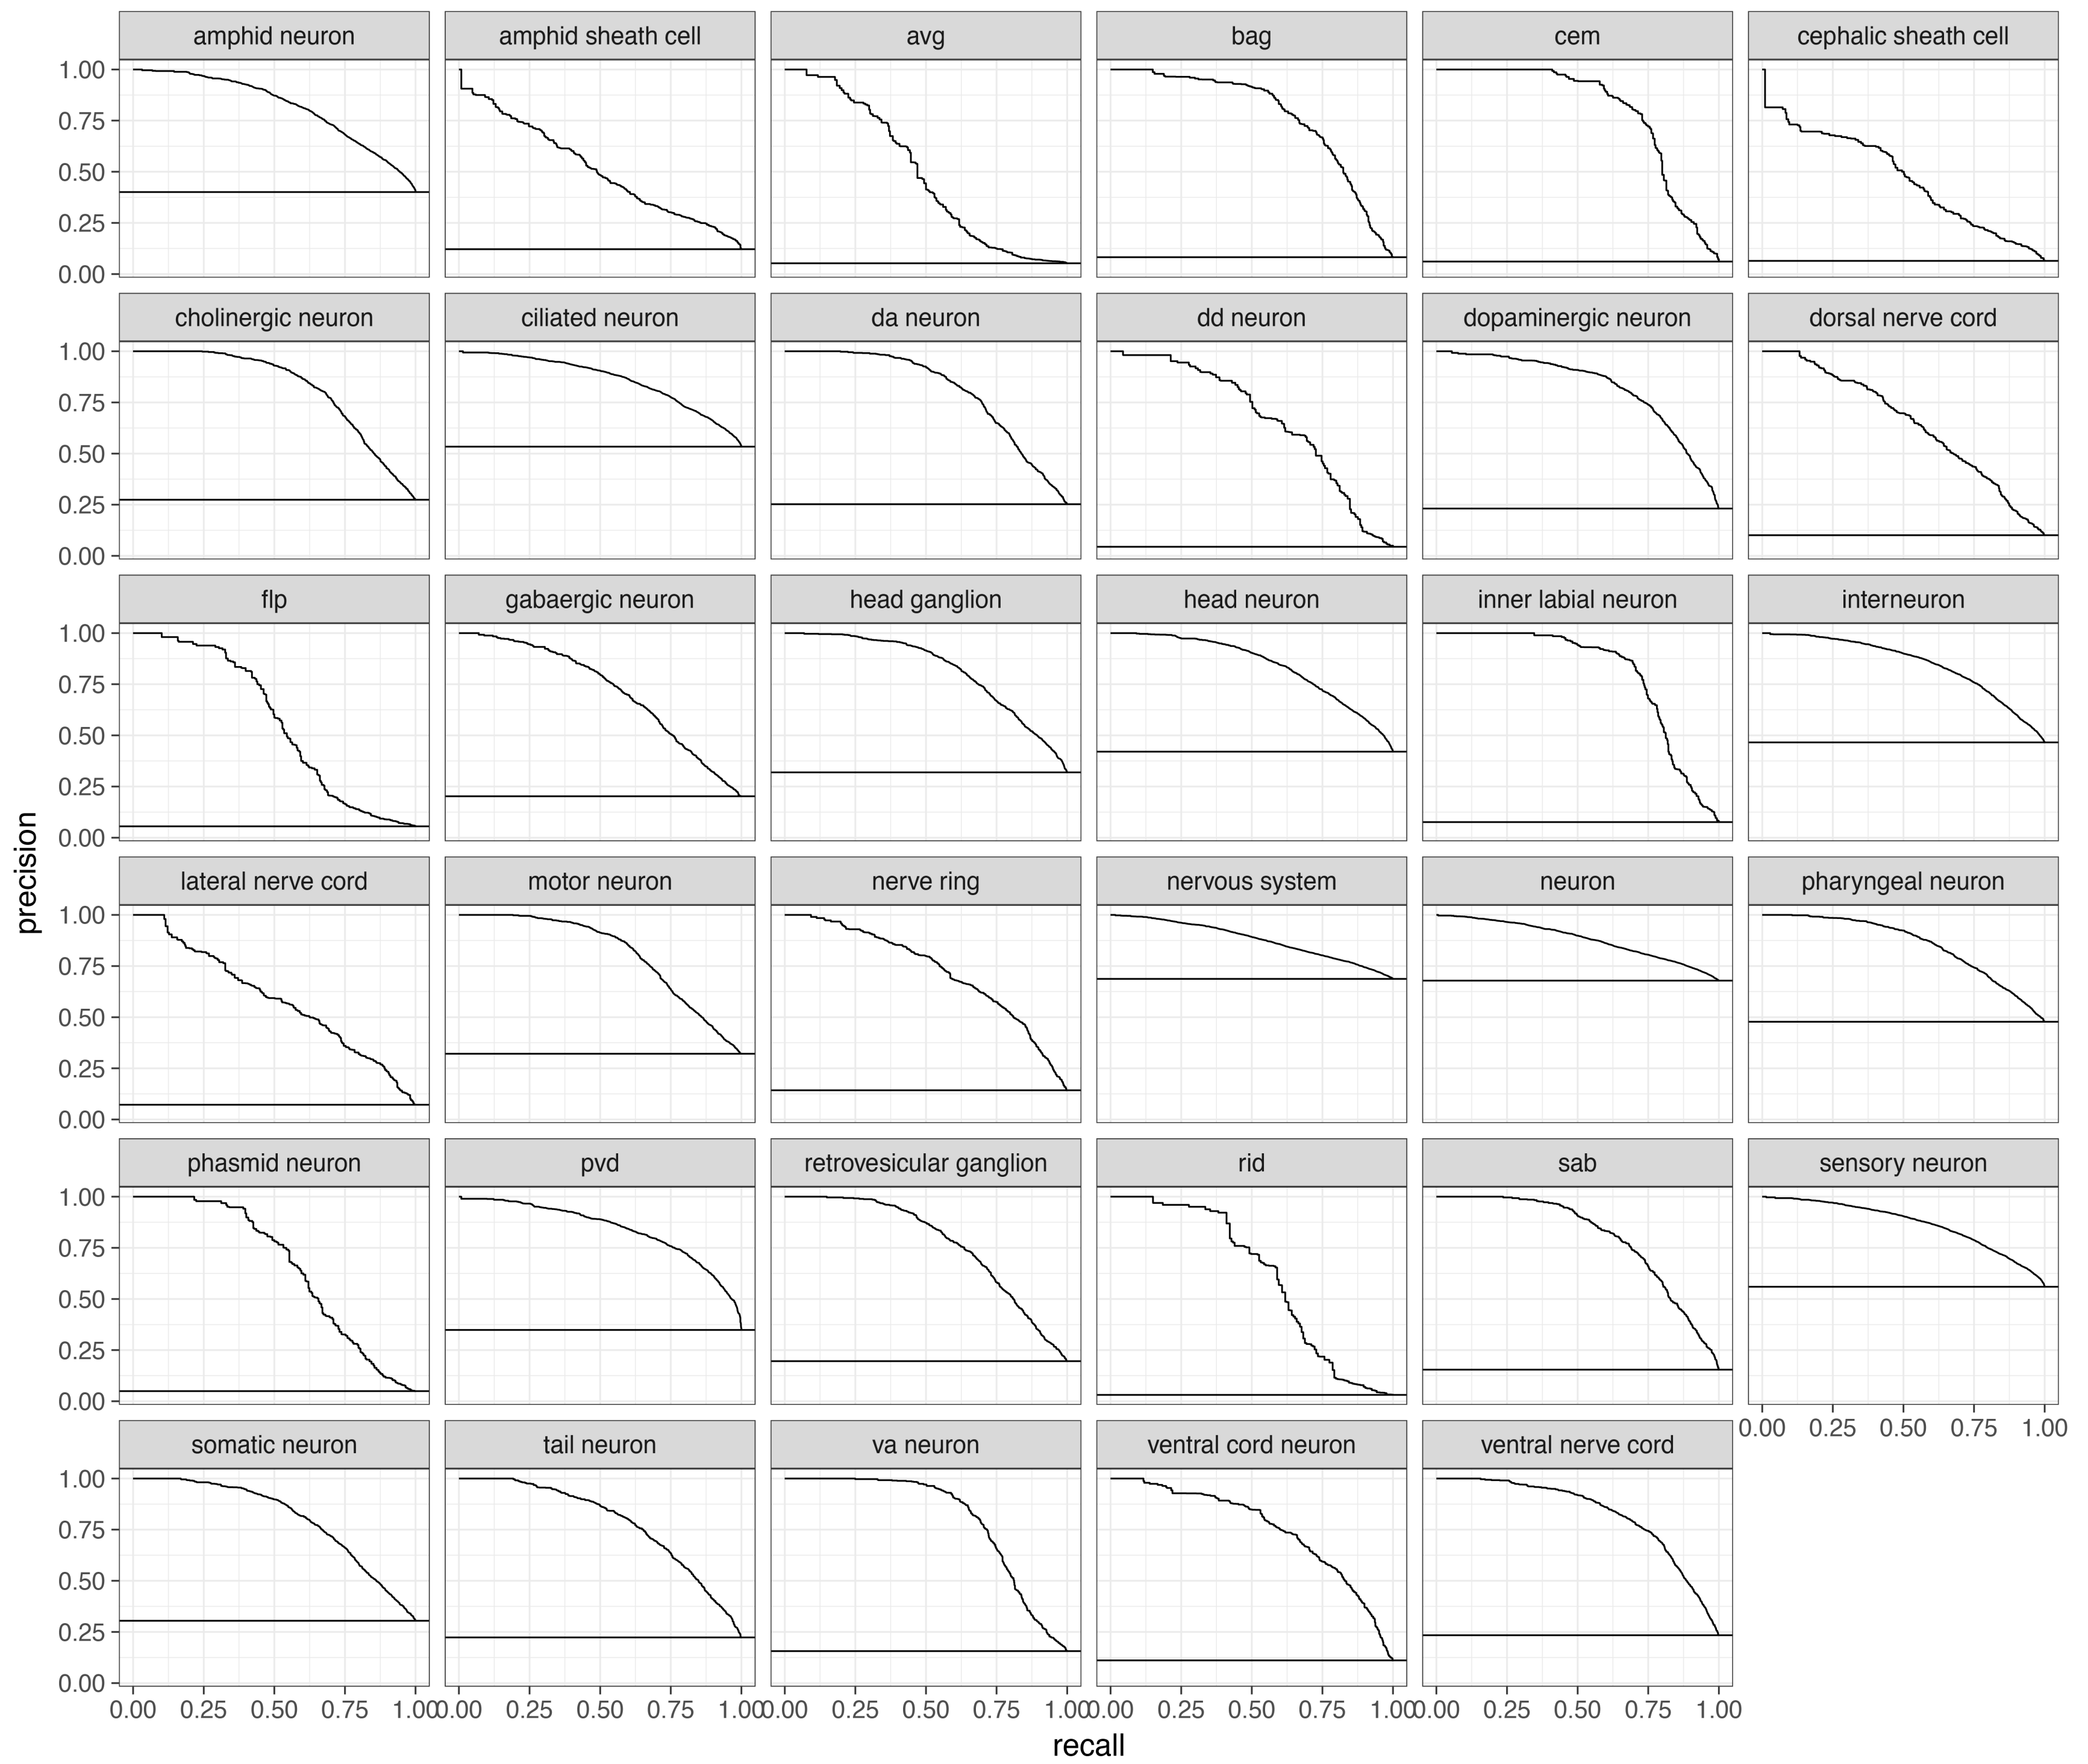

B

## muscular system tissues

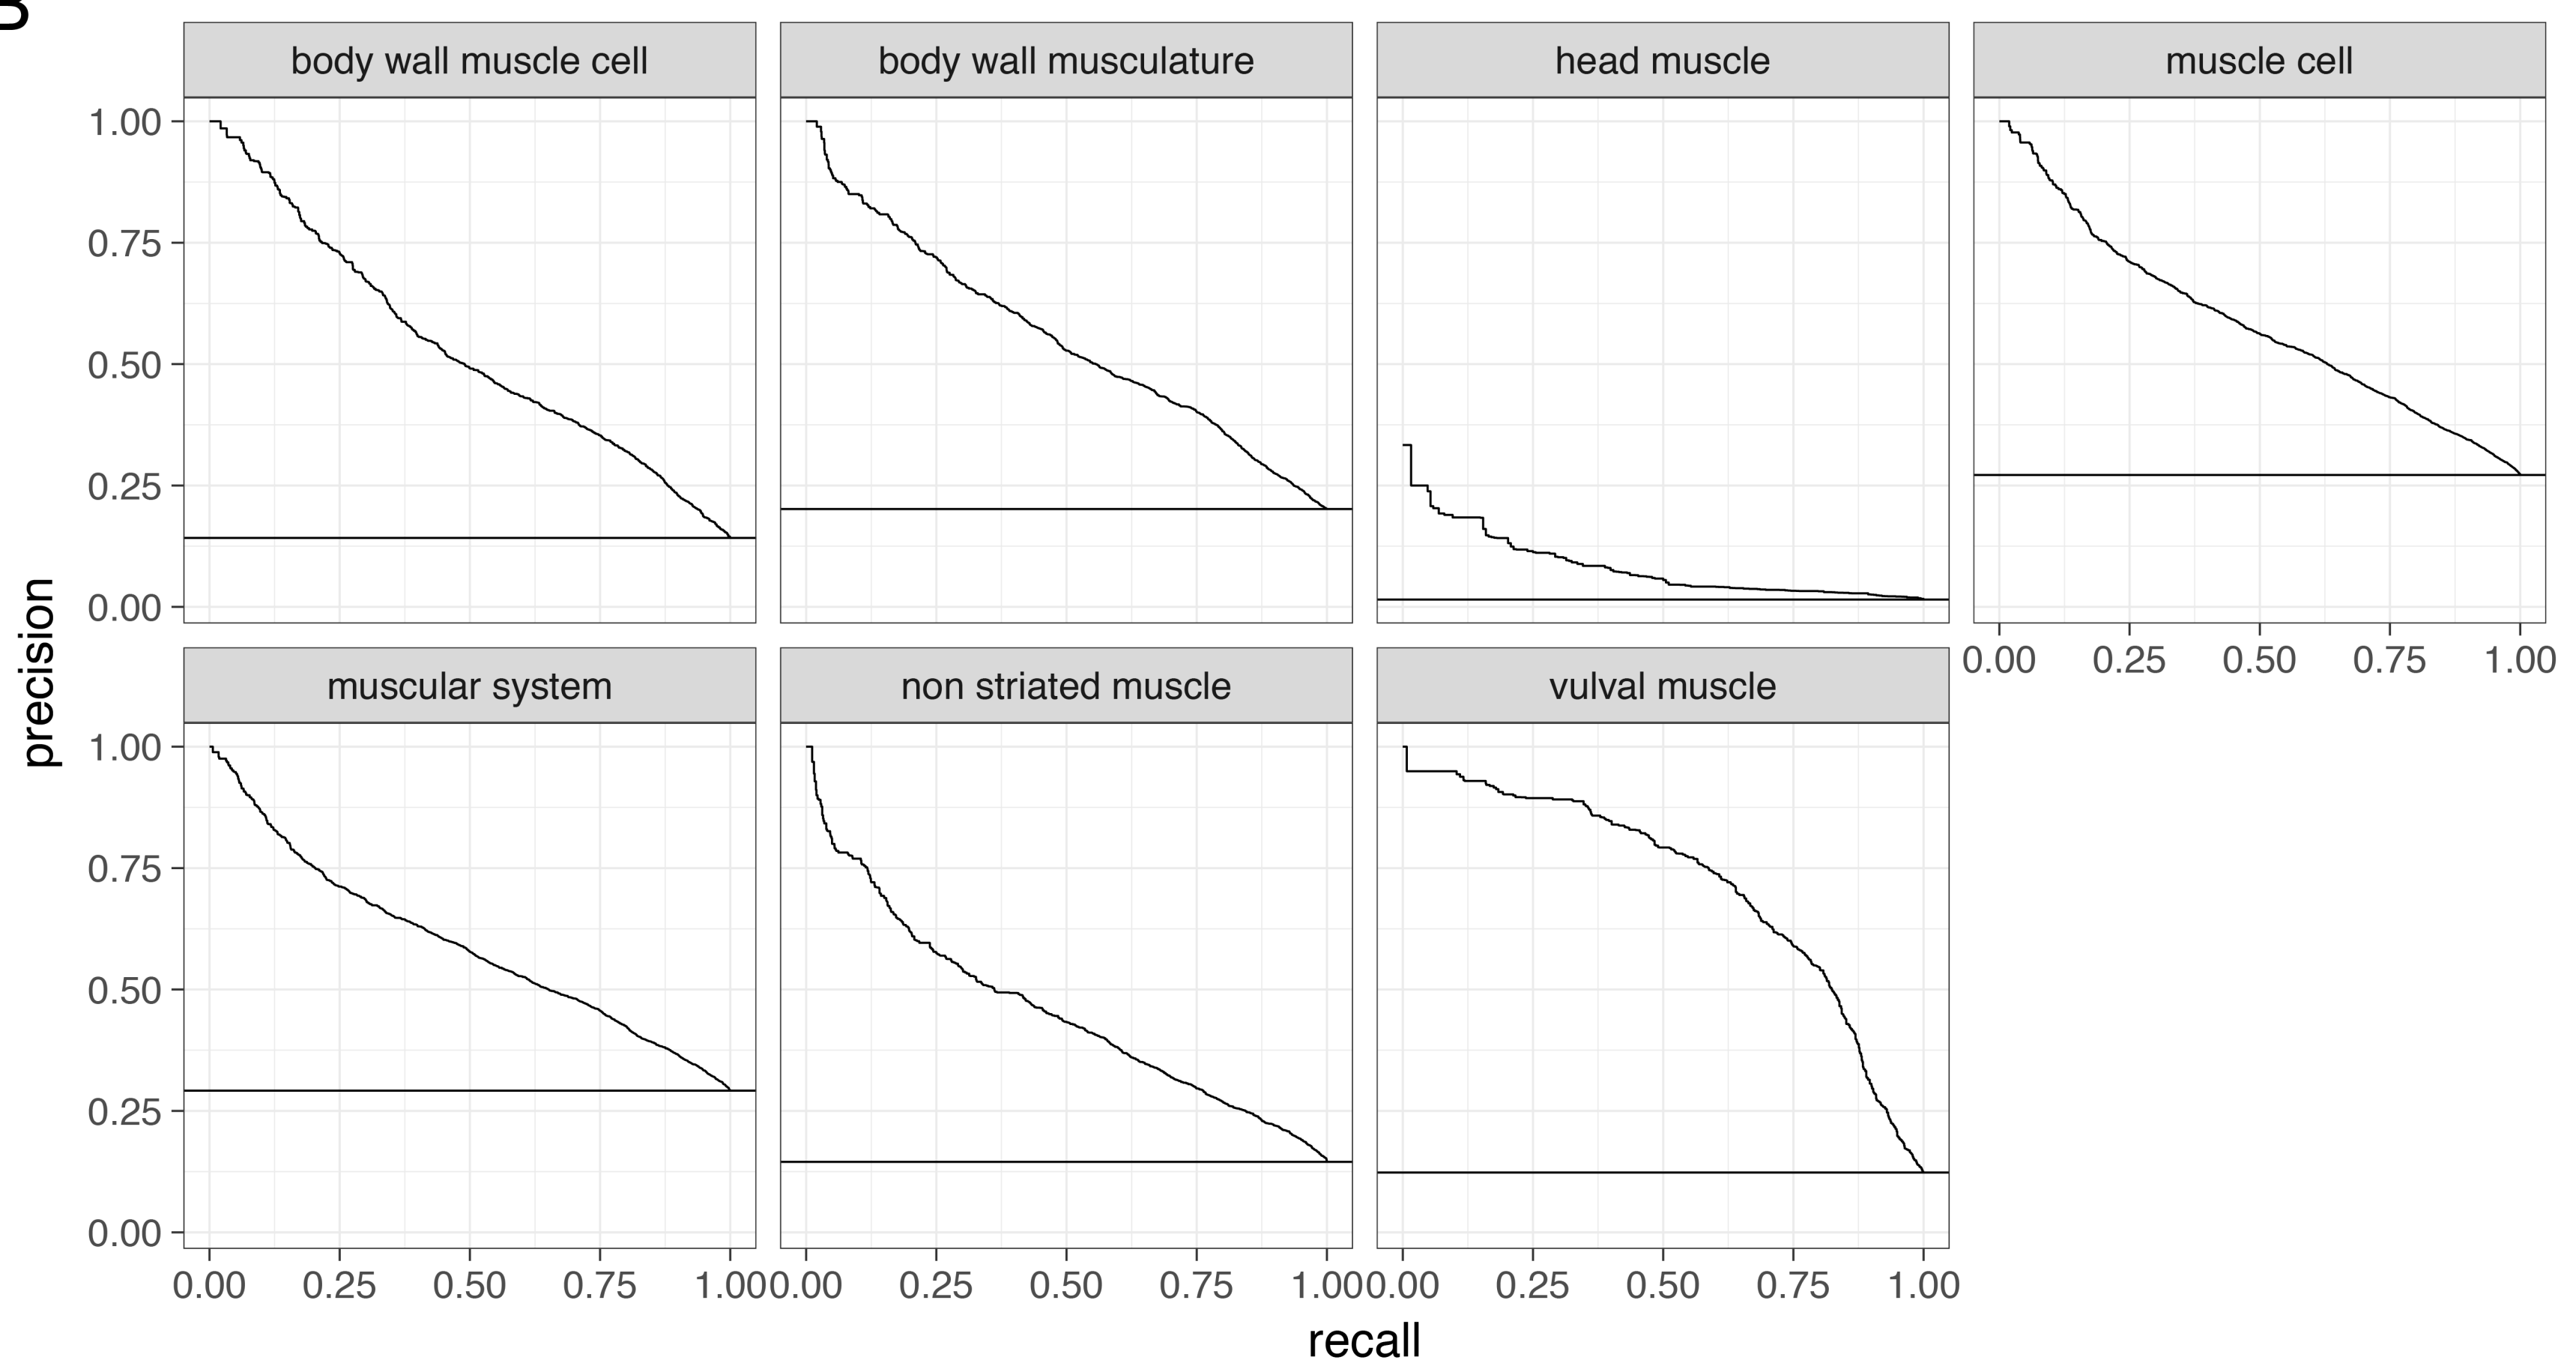

Supplement: pgen.1007559.s003.pdf [file pgen.1007559.s003.pdf]
