# Supplementary material for: Transcriptome analysis of adult Caenorhabditis elegans cells reveals tissue-specific gene and isoform expression
Source: PubMed Central journal article supplement (PMC6105014; doi:10.1371/journal.pgen.1007559), 2018-08-10

**A****reproductive system tissues**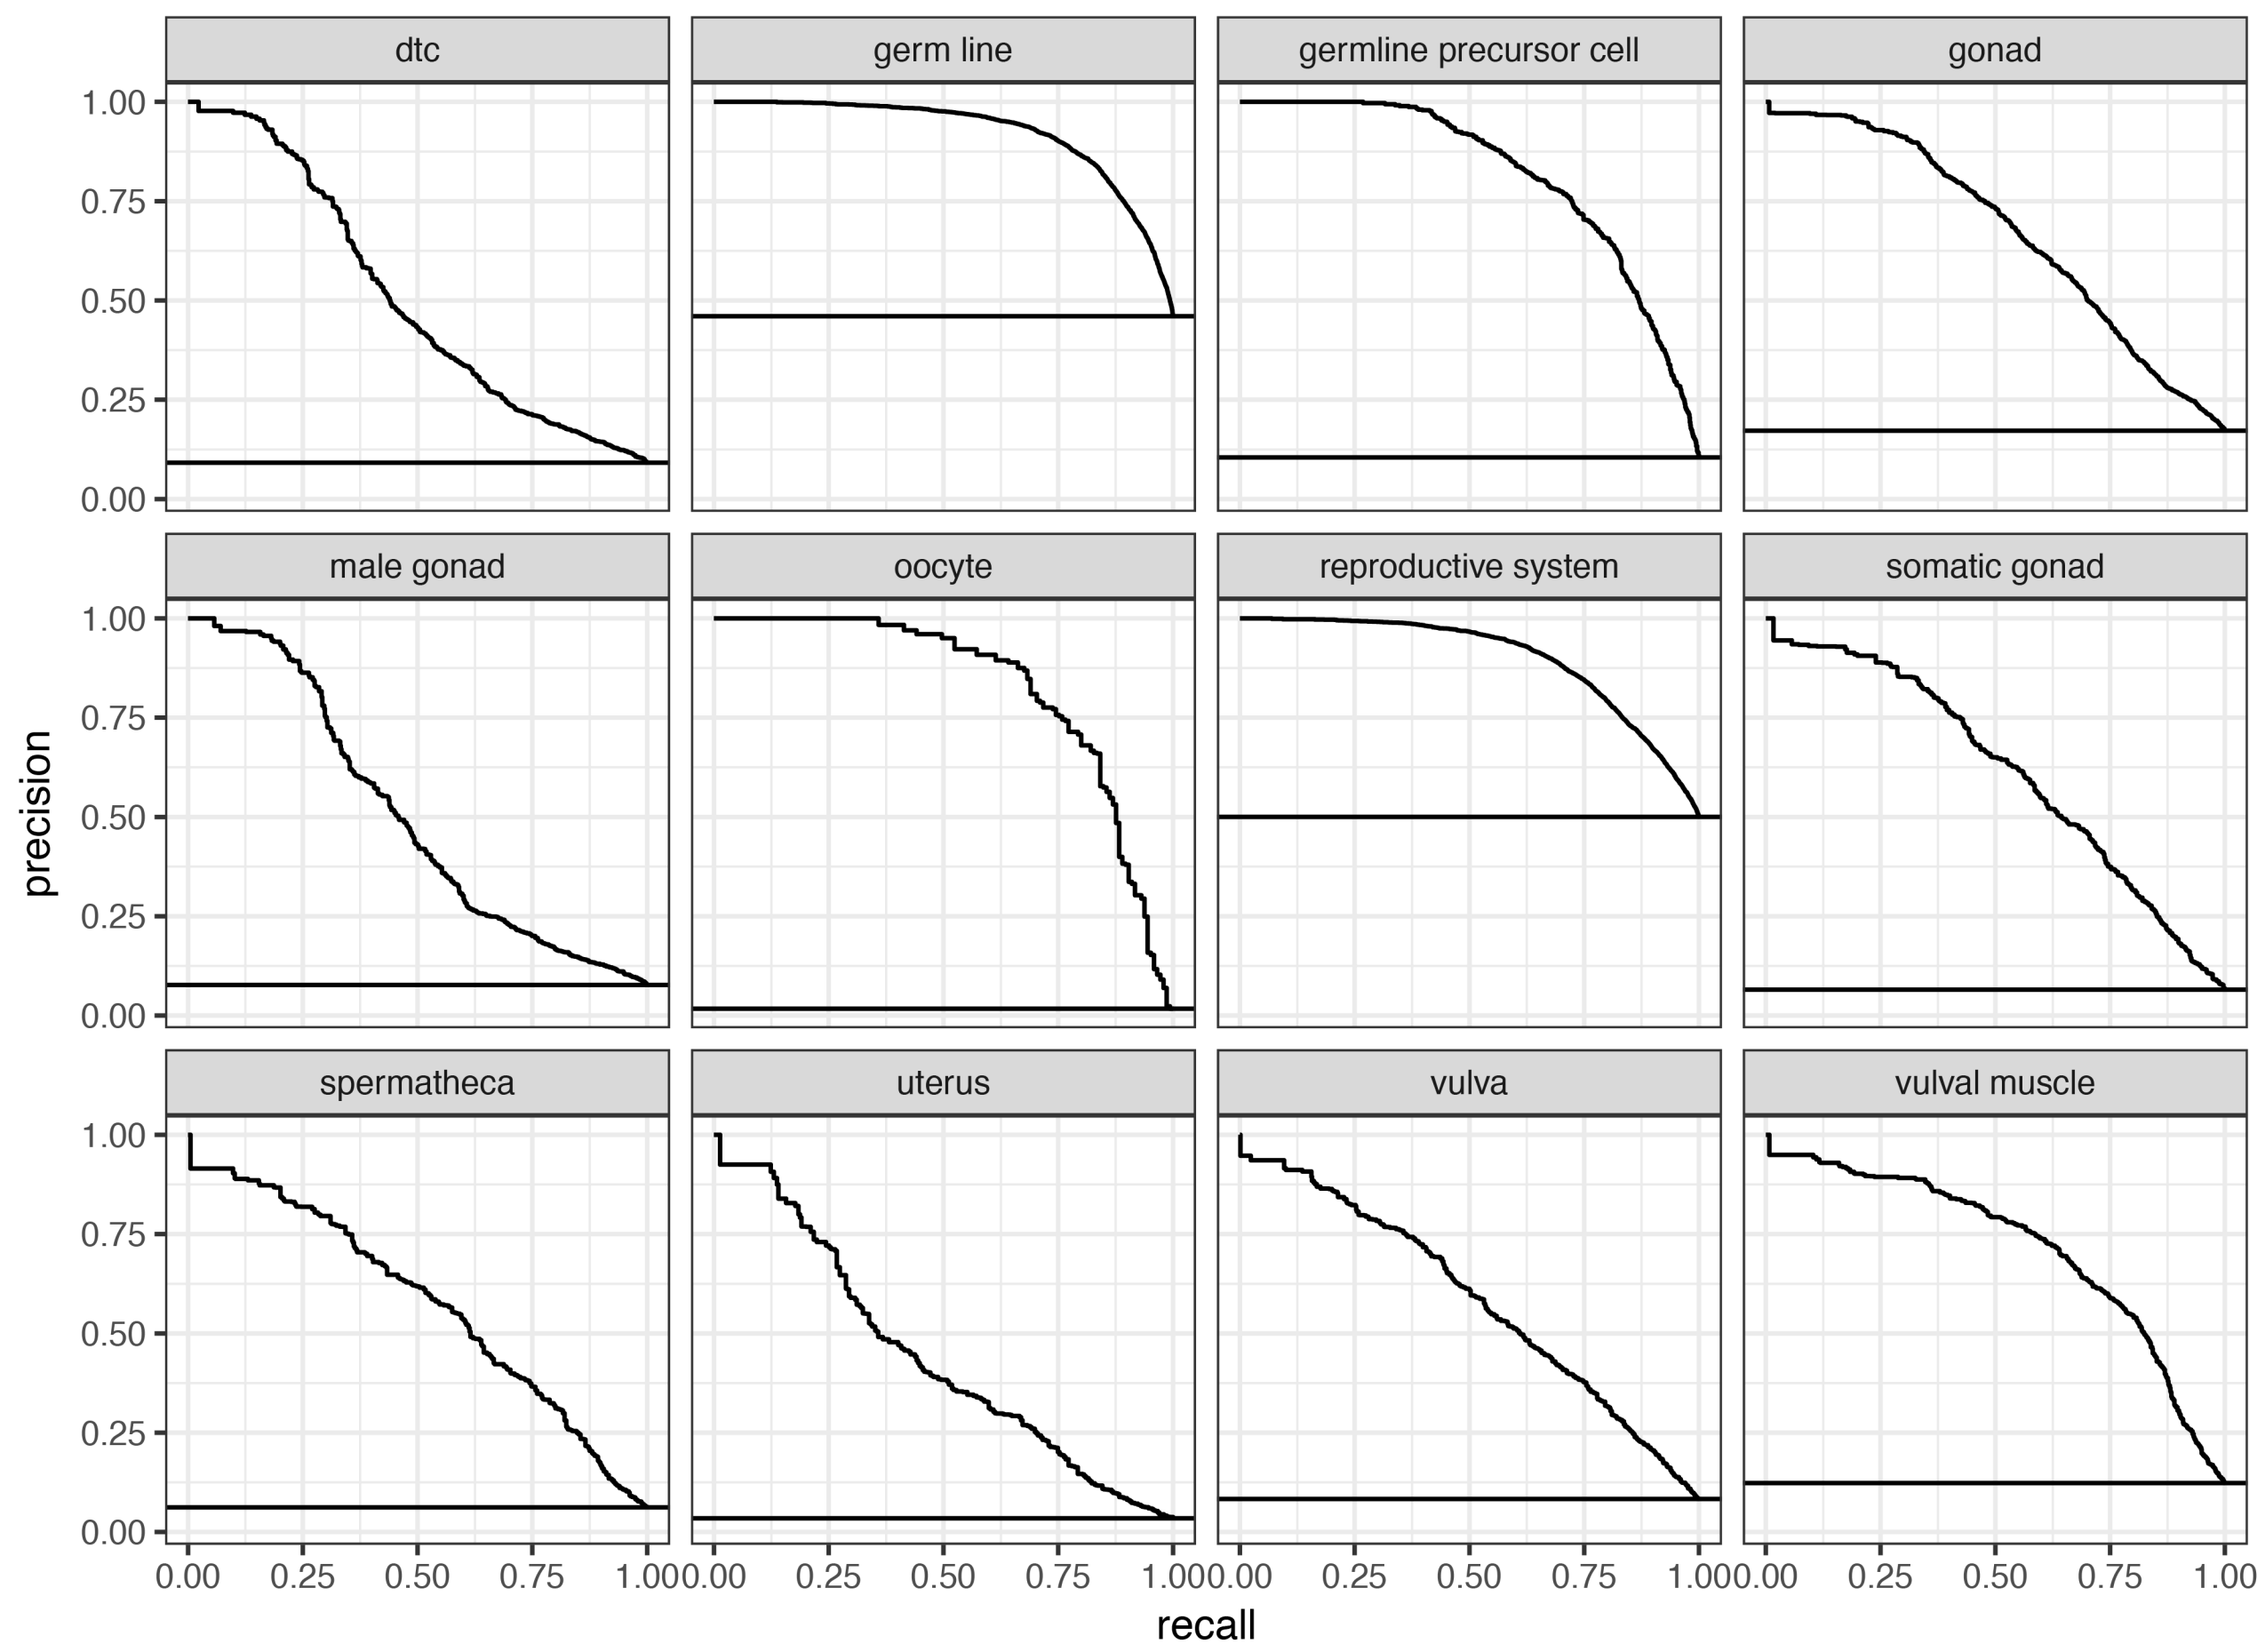**B****hermaphrodite specific tissues**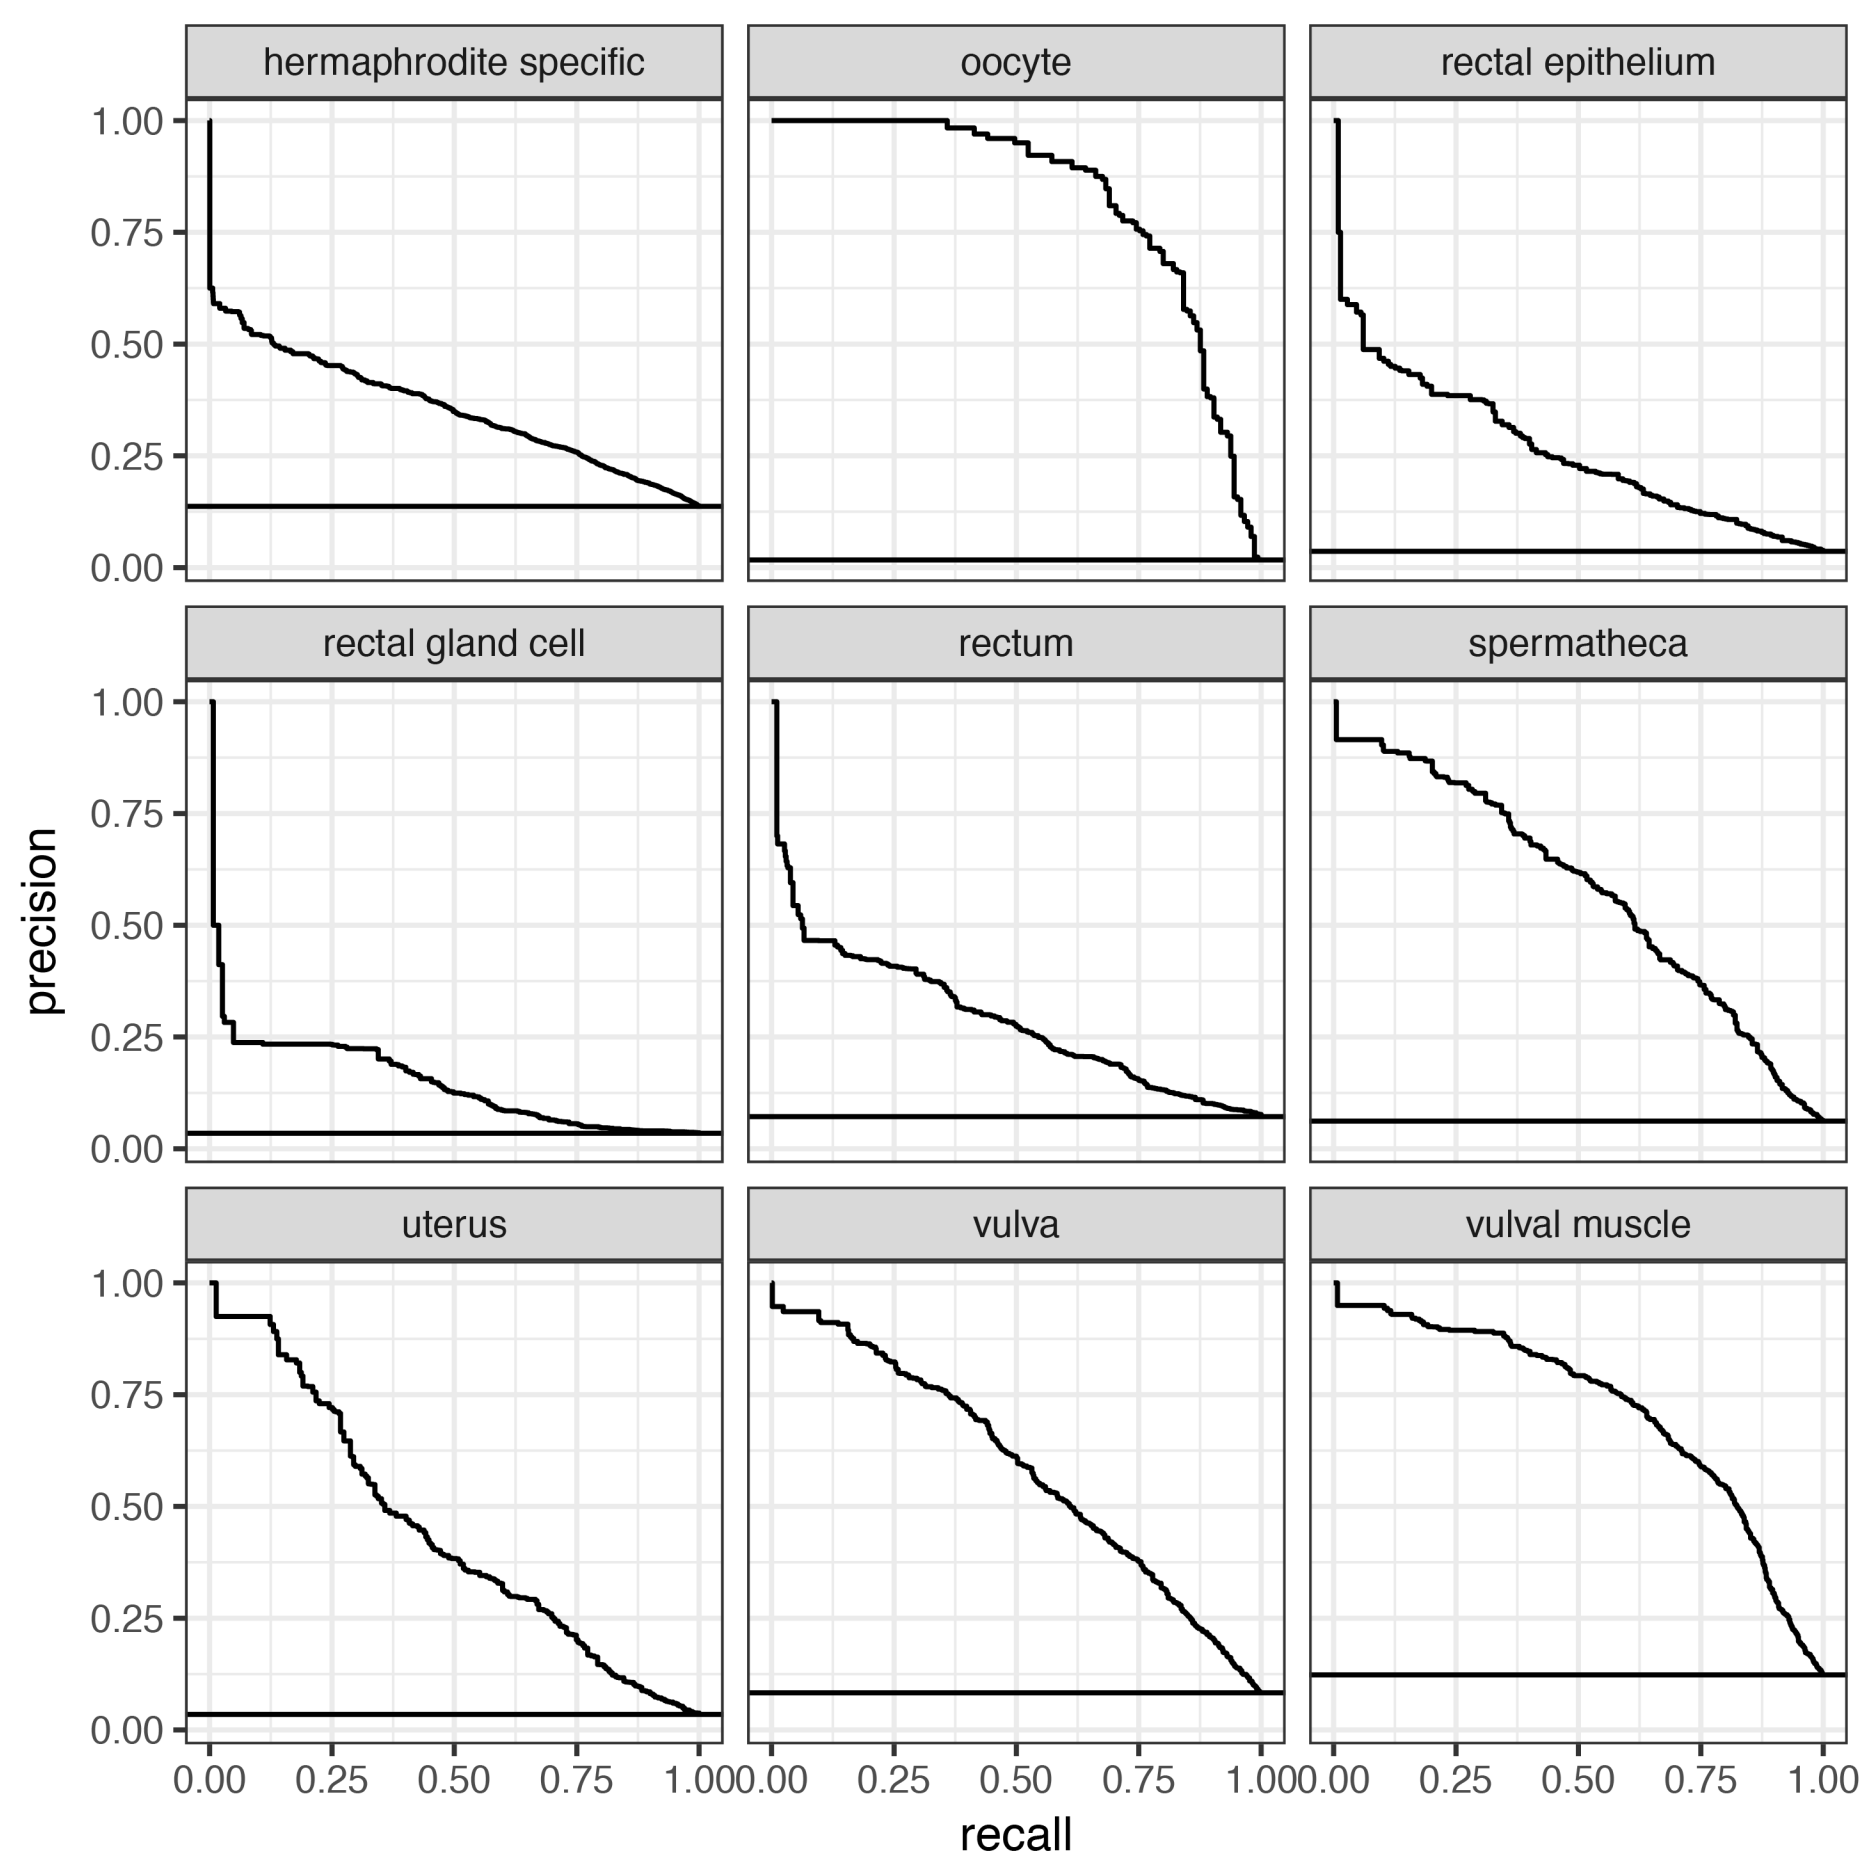**C****male specific tissues**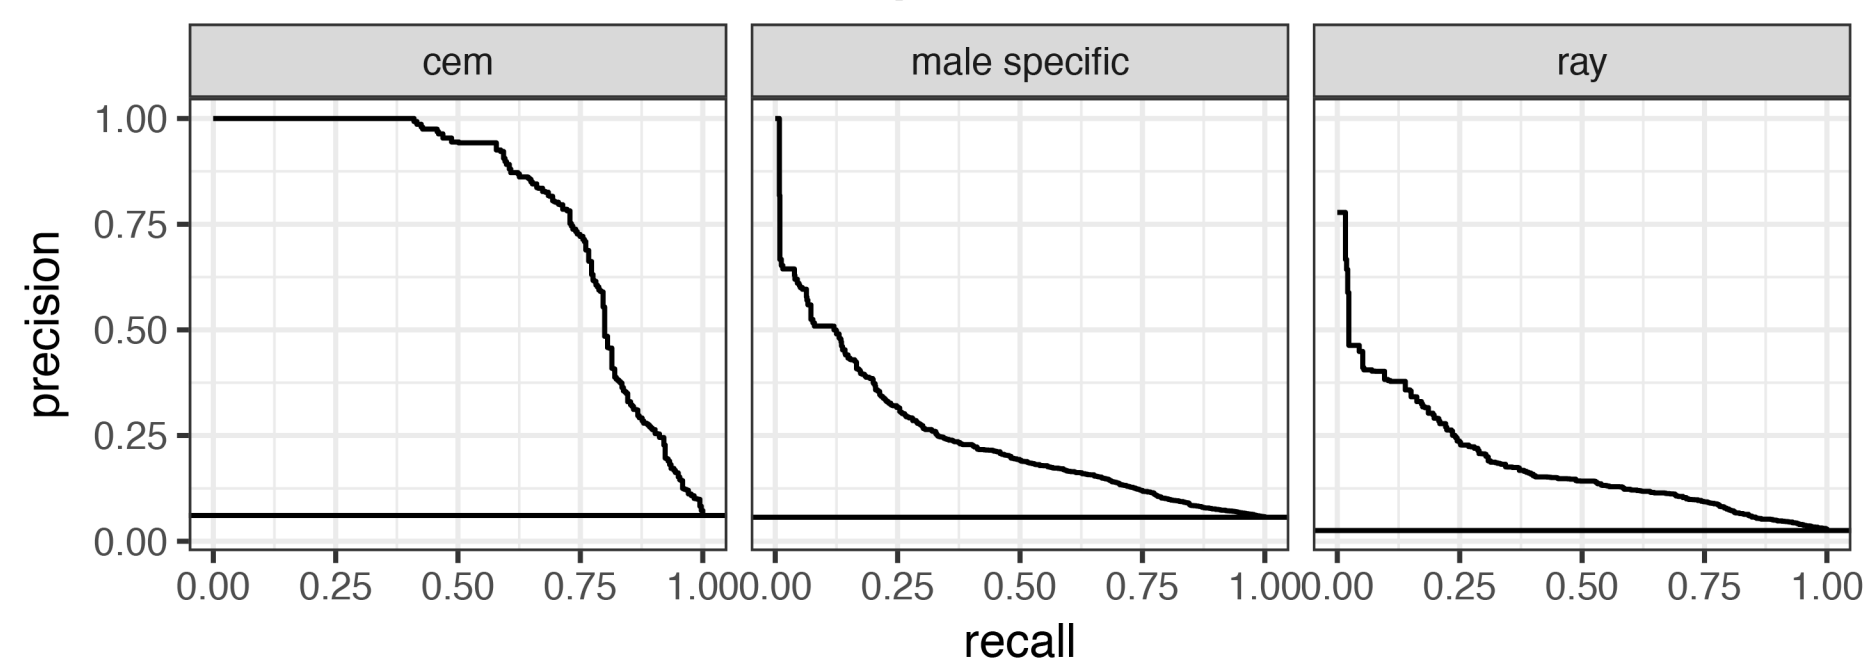

Supplement: pgen.1007559.s005.pdf [file pgen.1007559.s005.pdf]
