# Supplementary material for: Transcriptome analysis of adult Caenorhabditis elegans cells reveals tissue-specific gene and isoform expression
Source: PubMed Central journal article supplement (PMC6105014; doi:10.1371/journal.pgen.1007559), 2018-08-10

**A**

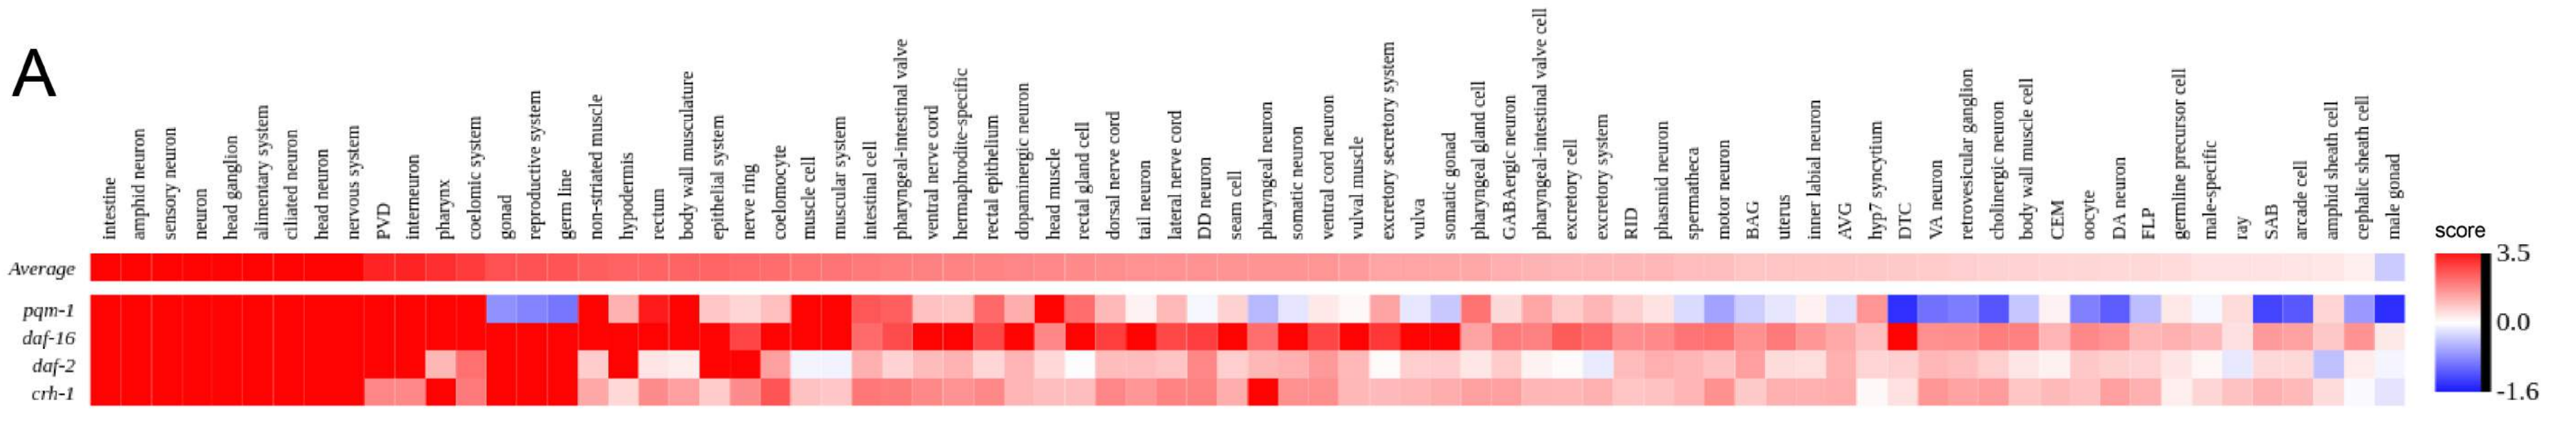

**B**

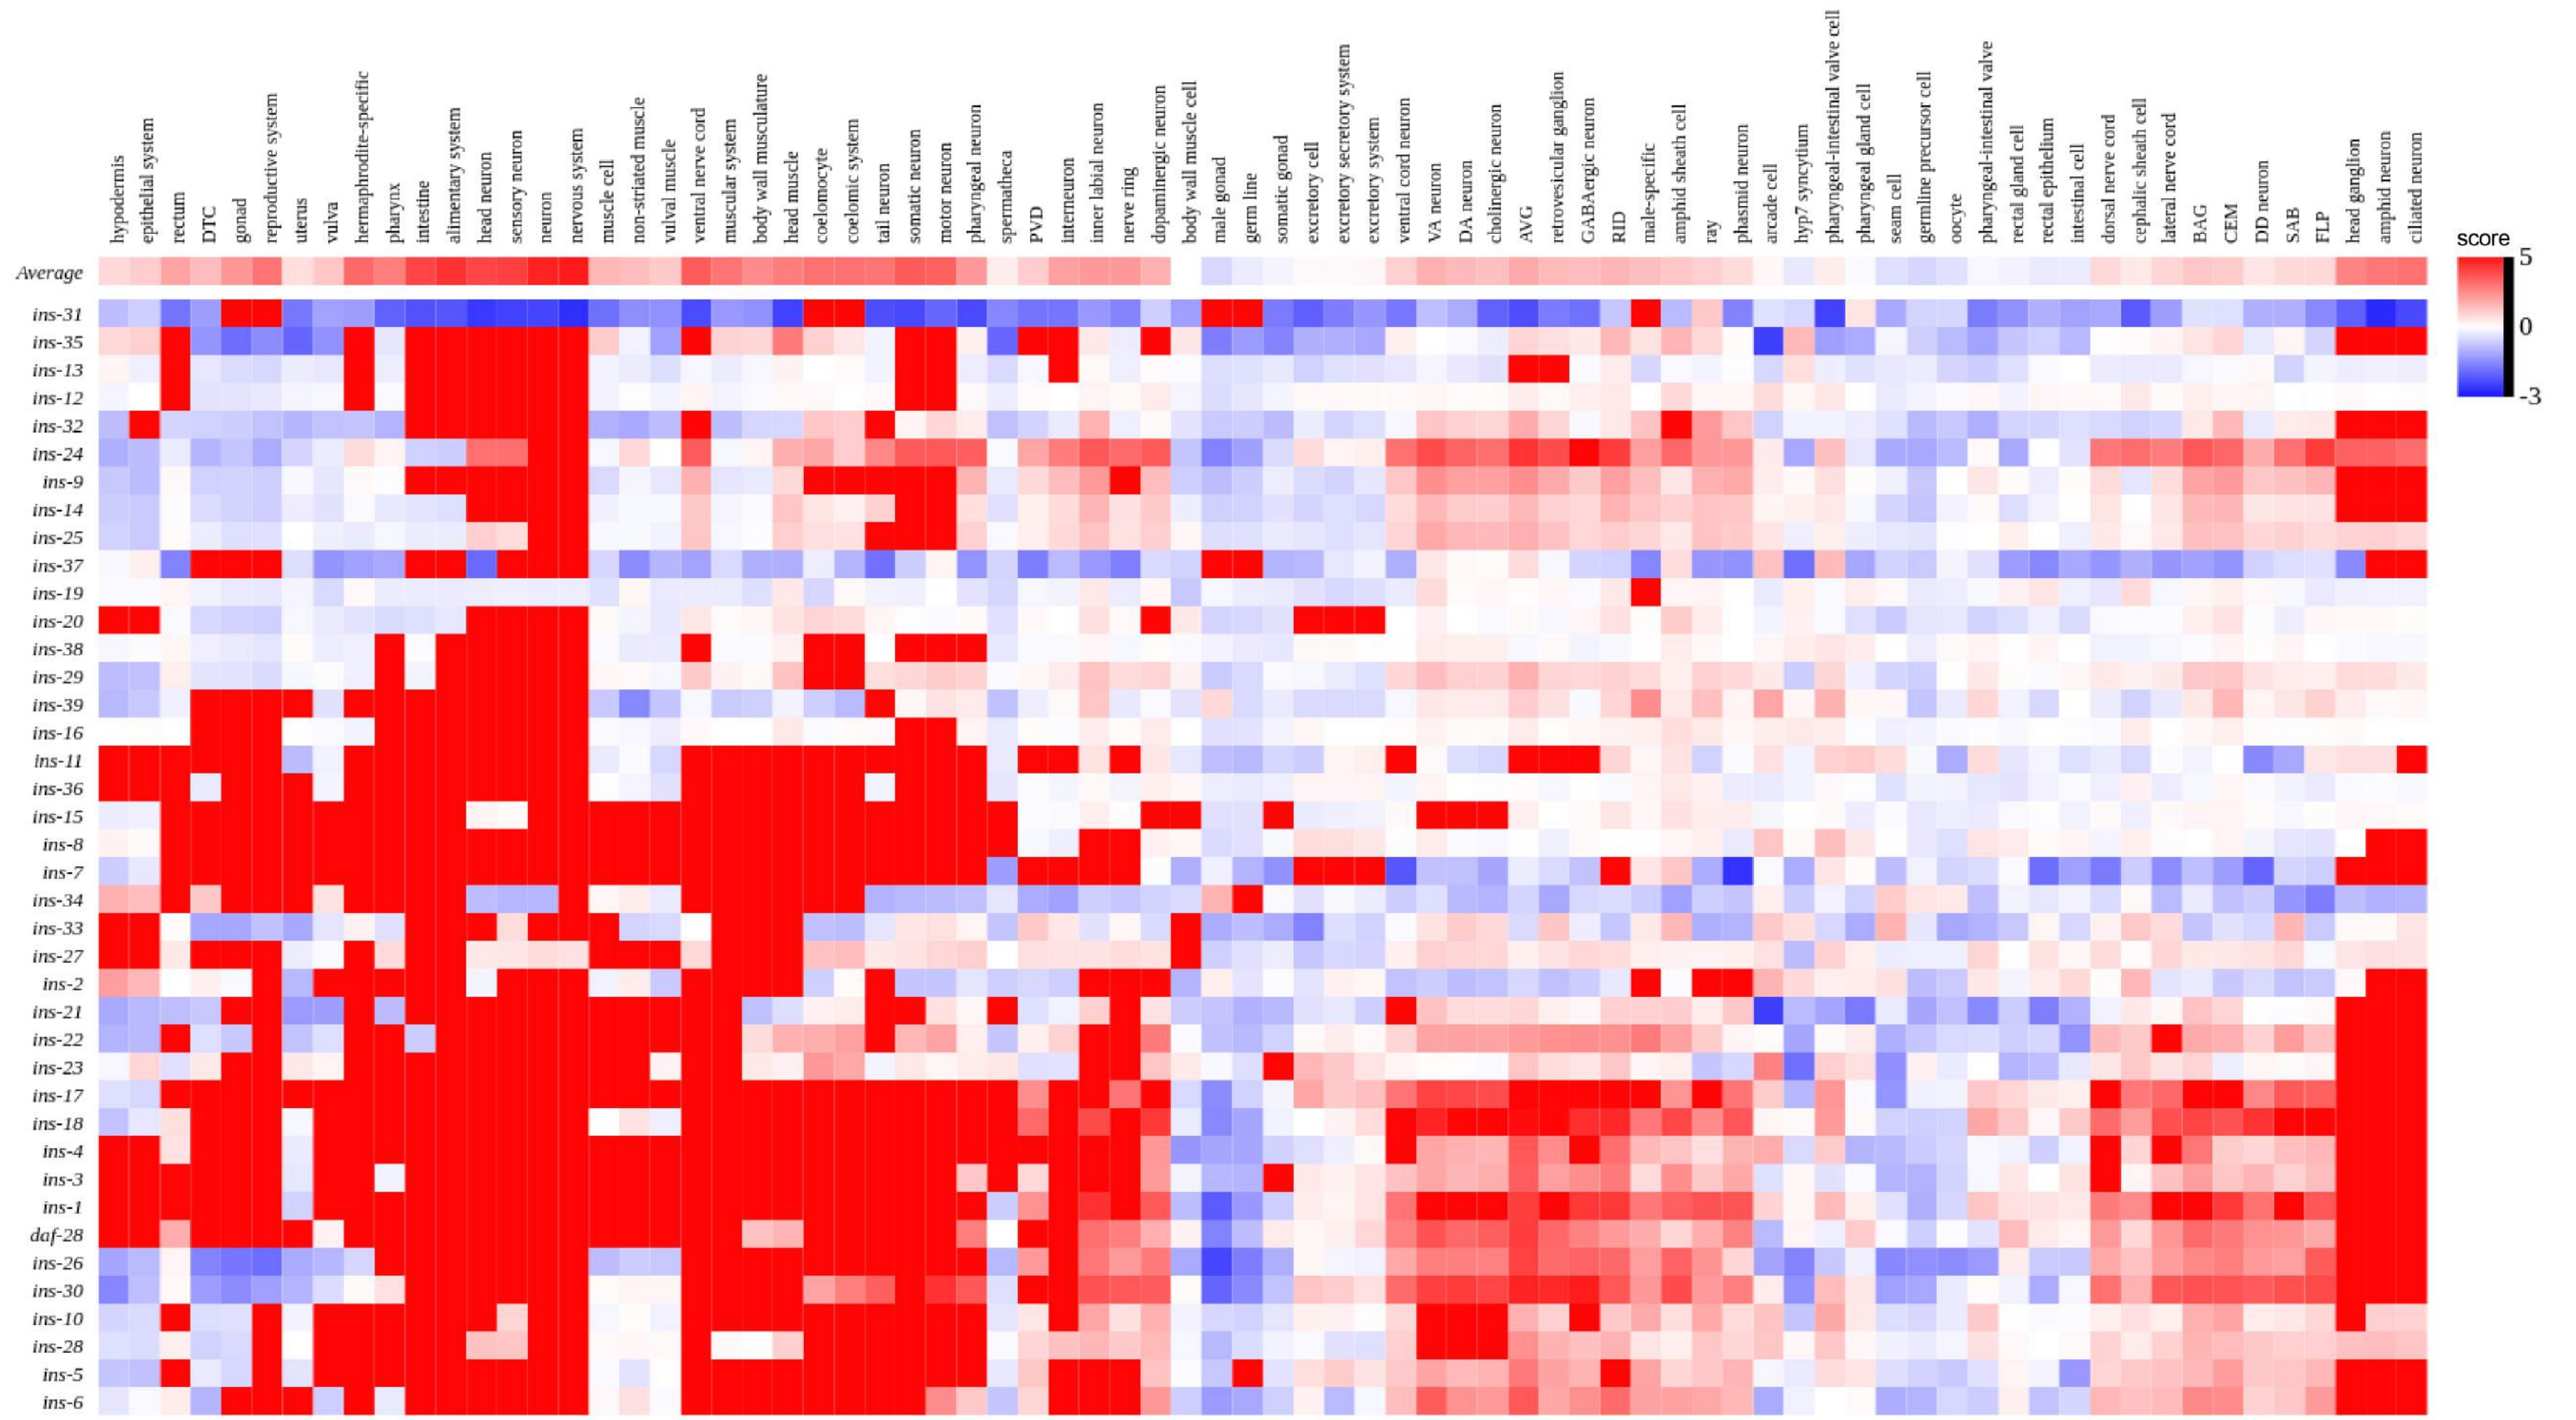

Supplement: pgen.1007559.s006.pdf [file pgen.1007559.s006.pdf]
