# Supplementary material for: Transcriptome analysis of adult Caenorhabditis elegans cells reveals tissue-specific gene and isoform expression
Source: PubMed Central journal article supplement (PMC6105014; doi:10.1371/journal.pgen.1007559), 2018-08-10
Supplement: pgen.1007559.s008.pdf [file pgen.1007559.s008.pdf]

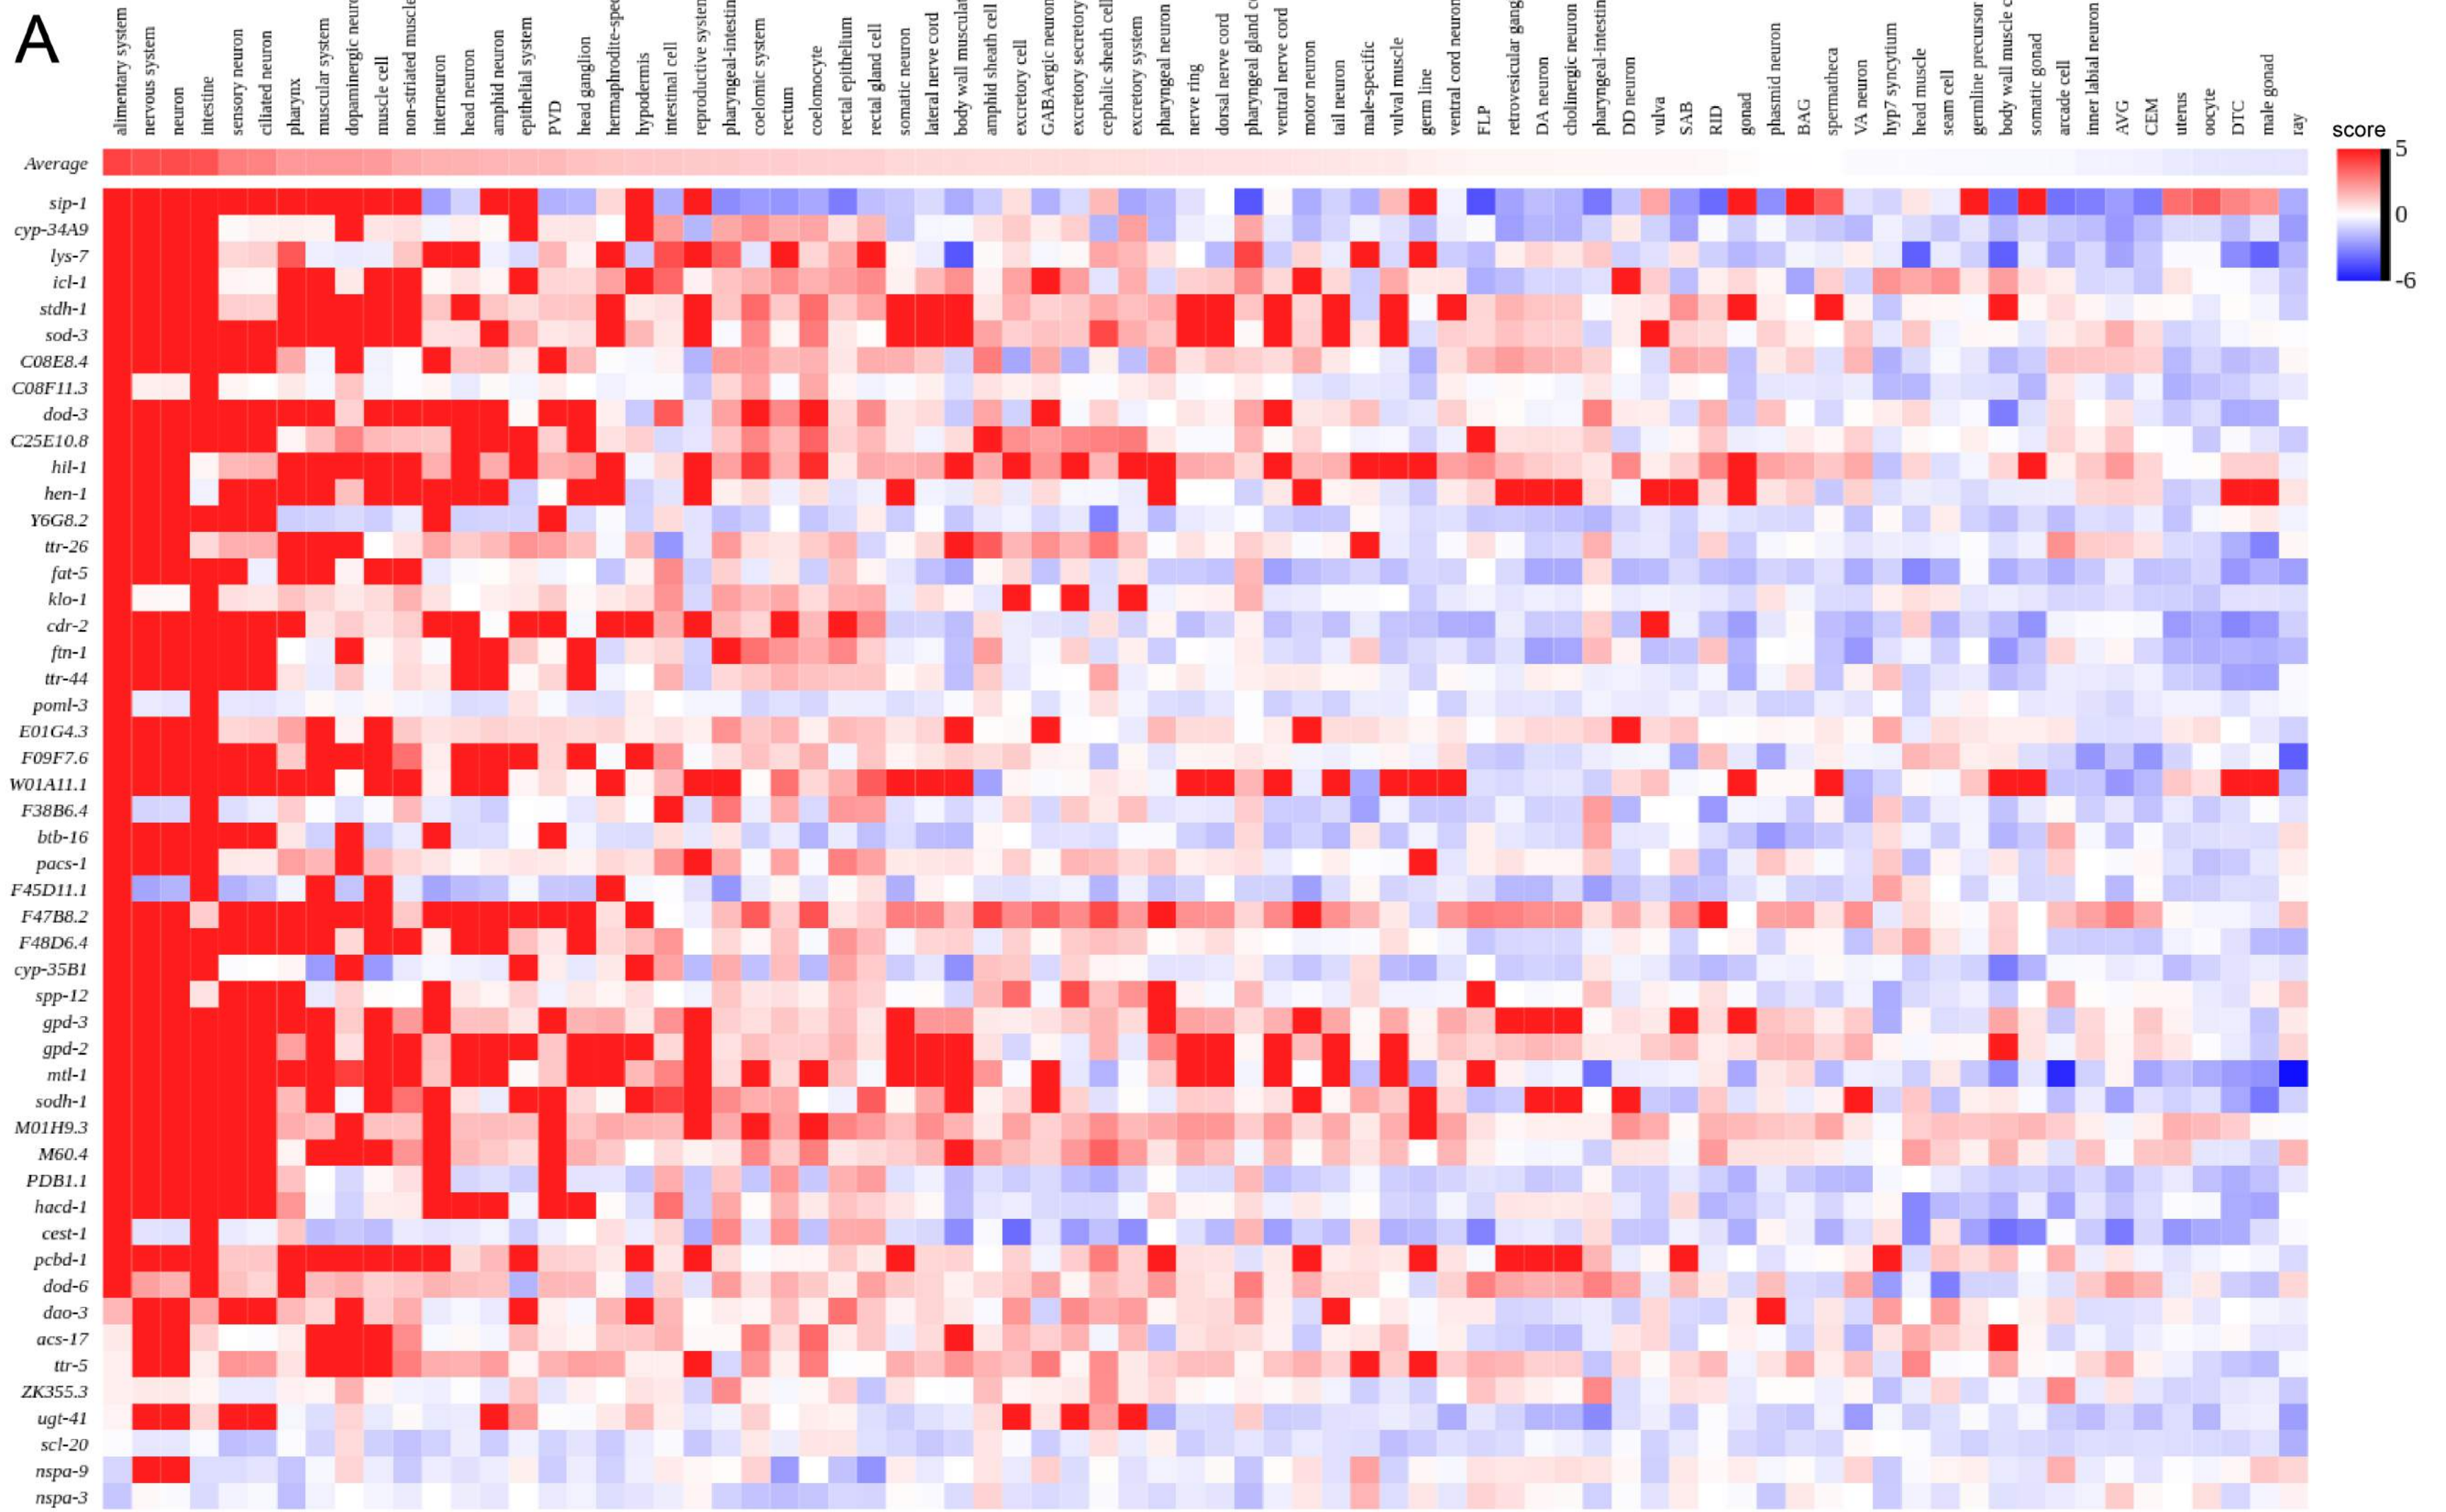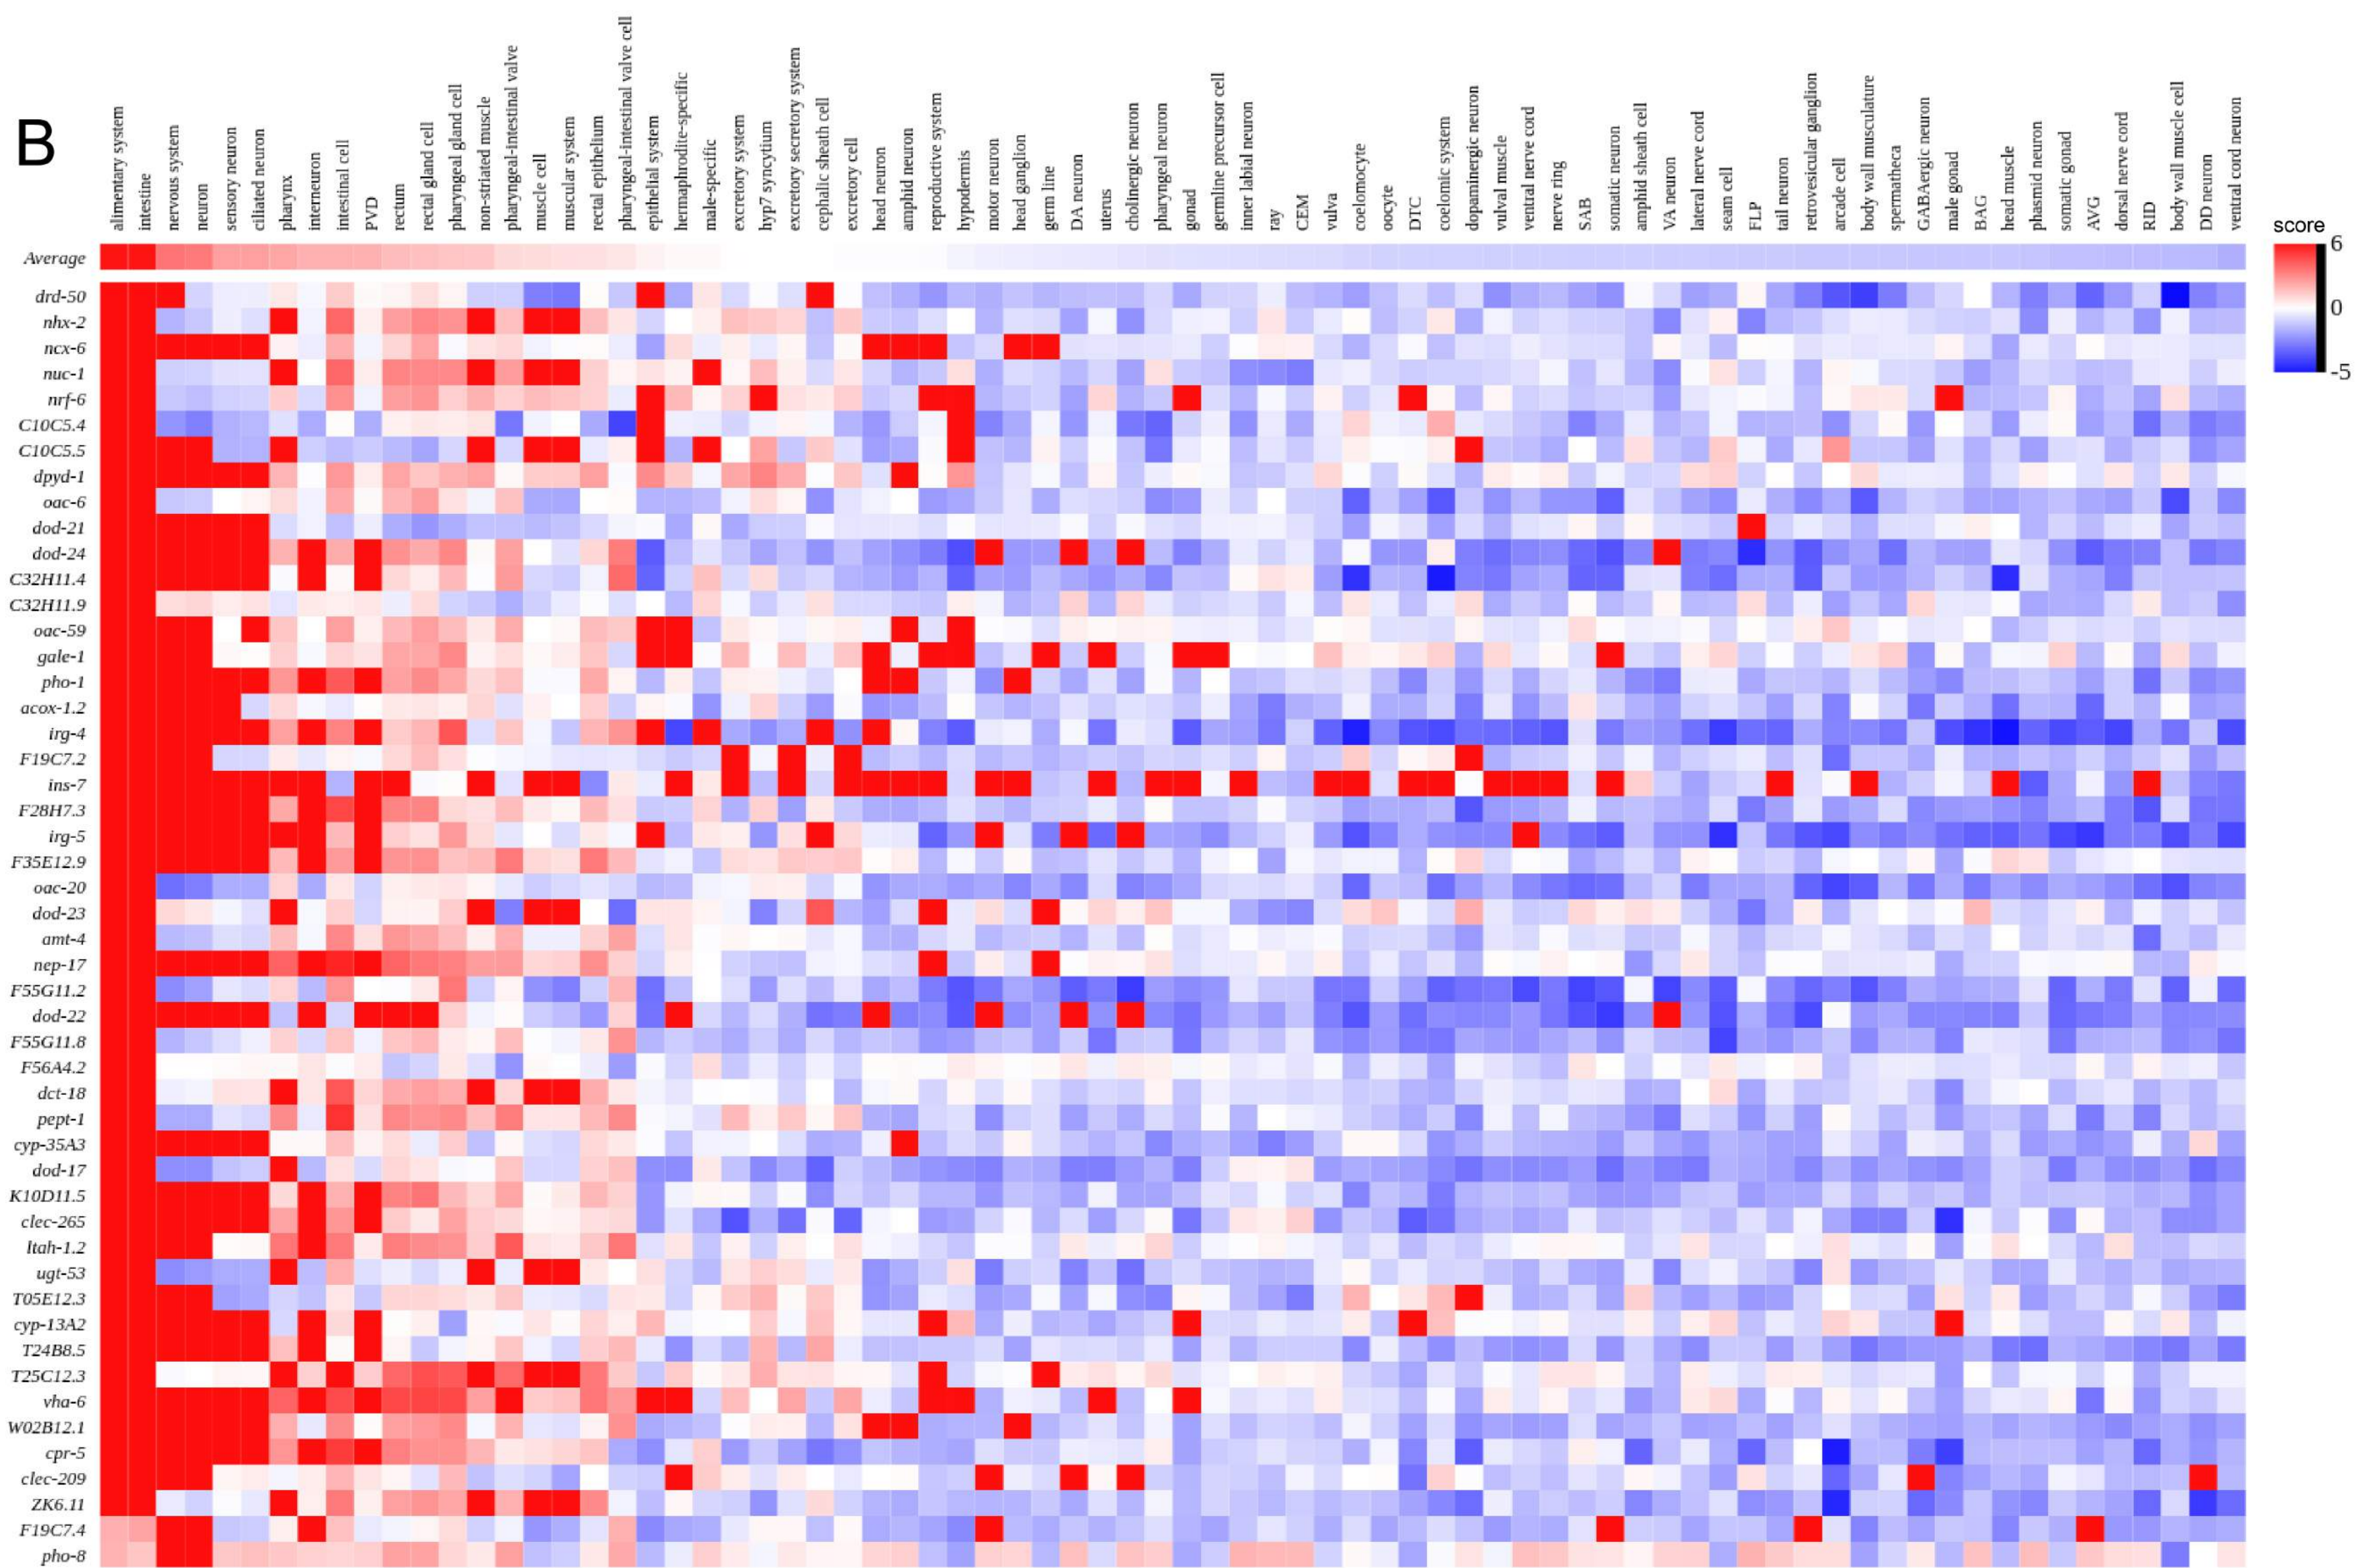

Supplemental Figure 8
