# Supplementary material for: Transcriptome analysis of adult Caenorhabditis elegans cells reveals tissue-specific gene and isoform expression
Source: PubMed Central journal article supplement (PMC6105014; doi:10.1371/journal.pgen.1007559), 2018-08-10

A

TGF- $\beta$  oocyte target genes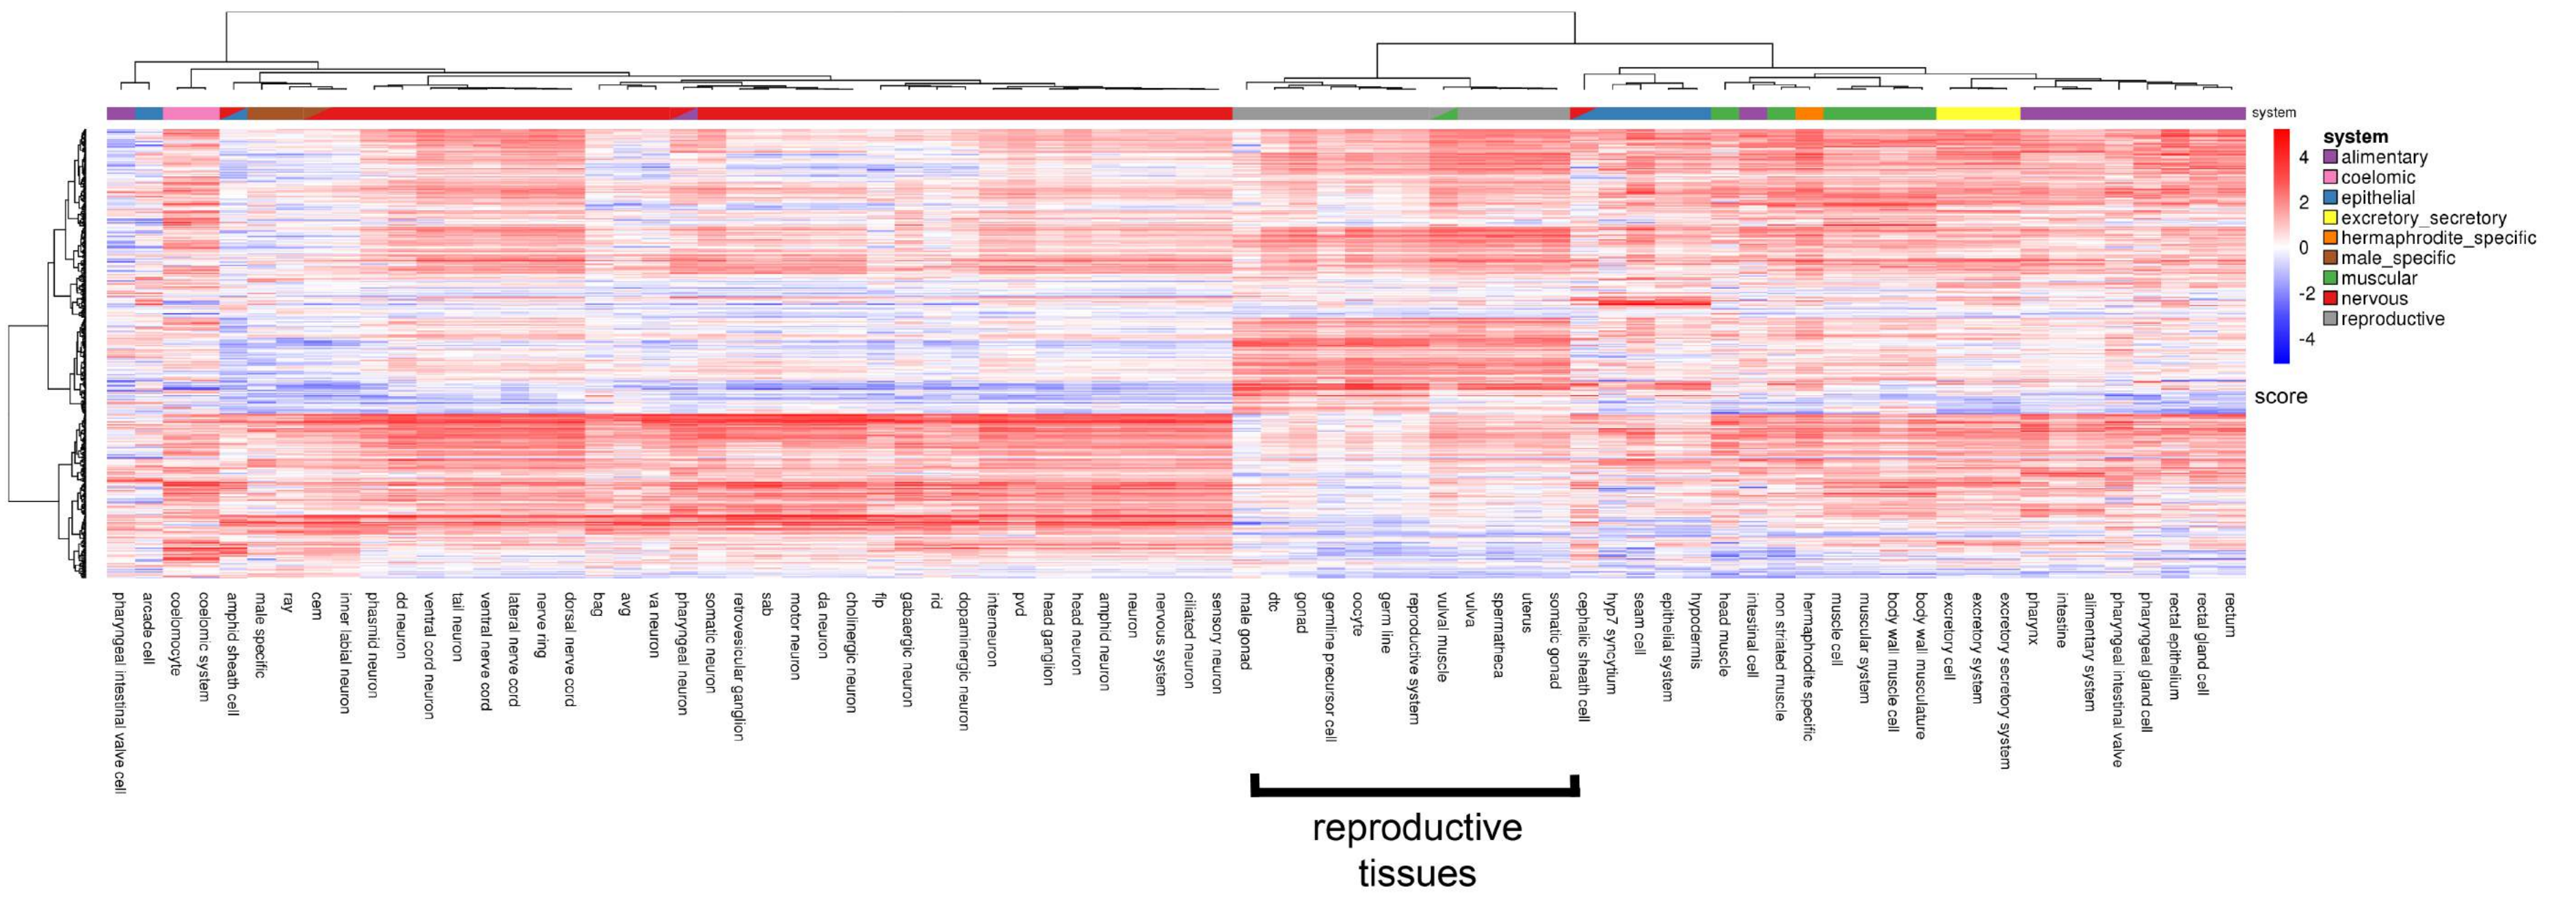

B

TGF- $\beta$  whole worm (L4) target genes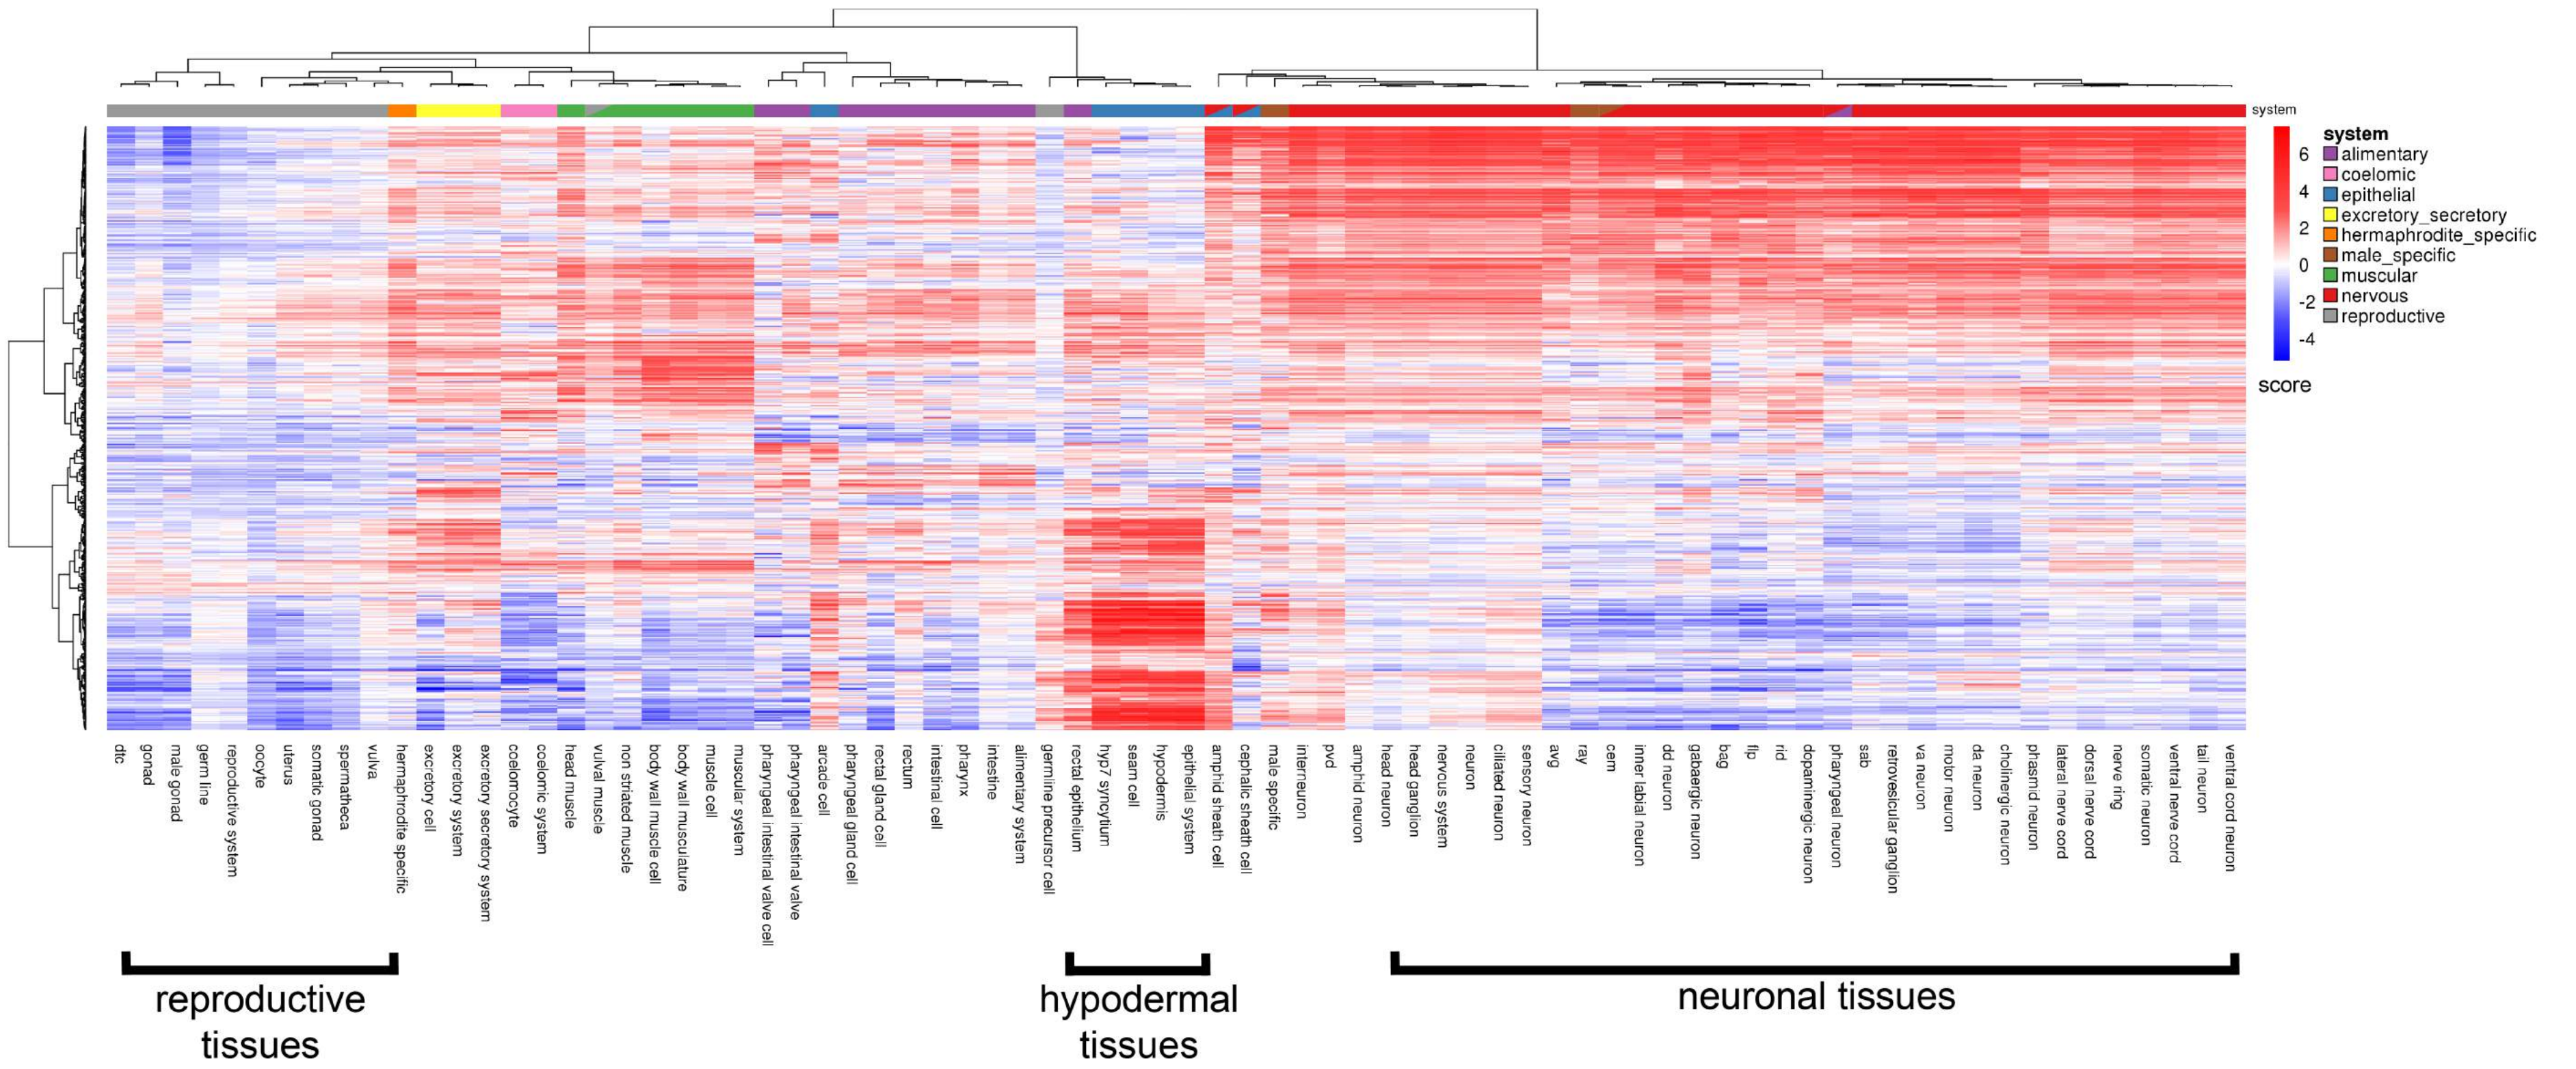

Supplement: pgen.1007559.s009.pdf [file pgen.1007559.s009.pdf]
