# Supplementary material for: Transcriptome analysis of adult Caenorhabditis elegans cells reveals tissue-specific gene and isoform expression
Source: PLoS Genet. 2018 Aug 10;14(8):e1007559. doi: 10.1371/journal.pgen.1007559 (PMC6105014; doi:10.1371/journal.pgen.1007559)
Supplement: S9 Table — ‘Unique’ tissue-specific genes are strongly expressed (logRPKM > 5) and significantly differentially expressed in comparison to the expression of each of the three other tissues (FDR ≤ 0.05, logFC > 2 for each comparison). Transcription factors (wTF3.0[86]) are listed in red. (XLSX) [file pgen.1007559.s018.xlsx]

## Sheet: hypodermis
Gene	entrez
B0222.5	181860
B0303.11	176222
B0361.9	176033
B0410.3	180580
C01B10.11	3565843
C01C10.2	182067
C03D6.1	182158
C03G6.17	182179
C05C8.7	179120
C05D9.9	180466
C06A8.3	174259
C08H9.15	3564883
C11G10.1	182521
C16A3.10	175908
C27B7.9	3565797
C29F7.3	181464
C29G2.6	183035
C31C9.7	259476
C34D10.1	181060
C34F11.8	173892
C35C5.9	183231
C38C3.10	6418706
C39D10.8	181046
C48E7.1	172322
C49F5.7	183615
C49H3.12	183629
C50B8.1	179840
C50F4.8	179332
C53D6.7	183761
C54E4.5	183790
C54G10.4	179969
C55A6.12	3565529
D1022.4	174215
D2023.1	179615
F07C6.3	184138
F08F3.4	178924
F11F1.1	3565569
F13D11.4	184416
F13D12.3	174797
F13H10.6	260099
F13H10.8	4363079
F16C3.2	172879
F17C8.9	13189316
F17H10.2	184623
F18E9.3	181112
F19H6.6	184700
F22B7.9	176213
F22F7.8	13211828
F23B12.4	179944
F23D12.11	13223834
F23F12.12	175927
F25B4.8	184918
F25D1.5	184922
F25E5.8	184927
F29C6.1	172947
F32H5.3	179816
F35C11.7	353401
F36A2.3	172690
F36H9.4	353436
F40A3.2	179169
F40H3.2	185571
F41D9.2	185612
F41E6.12	185621
F42A8.1	174481
F42F12.4	181393
F43H9.4	179182
F45D3.3	179717
F45D3.4	179718
F45E1.4	185793
F46C5.1	174411
F46C5.10	259451
F52A8.5	172486
F53B3.6	180576
F53F1.2	179821
F53F8.4	186181
F55H12.4	186344
H06A10.1	186696
H40L08.2	13224091
K07B1.4	179314
K07E1.1	24104726
K07E3.4	181064
K09H9.5	187241
K12H6.4	187343
M106.3	174671
R03A10.5	181634
R05H10.1	175144
R07E5.4	175568
R07H5.8	178028
R08E5.3	178795
R11F4.1	173747
T01C8.2	181725
T04C12.11	13215068
T04F8.8	181351
T04G9.4	180425
T05A7.1	188081
T08H10.1	178844
T10H9.8	4363099
T12B3.3	177509
T13F3.6	180092
T21F4.1	180830
T25B9.1	177968
T25G12.3	188908
T27D12.1	174820
T27E4.7	179285
T27F6.8	189005
T28C12.4	179017
VF13D12L.3	174795
W02H5.8	178730
Y105C5A.8	190873
Y11D7A.3	177745
Y12A6A.1	181482
Y15E3A.4	181623
Y17G7B.10	174846
Y18D10A.23	173155
Y26E6A.3	3564786
Y37A1B.5	178360
Y38E10A.14	174896
Y42G9A.3	175865
Y47G6A.33	6418611
Y51A2D.18	180202
Y52B11A.8	173004
Y53G8B.1	190243
Y54G2A.32	177061
Y55B1BL.1	175199
Y57G11C.38	178410
Y62E10A.13	178304
Y95B8A.6	171674
ZC250.4	6418818
ZK185.3	177220
ZK512.7	176290
ZK550.6	178503
ZK6.8	191208
ZK829.1	191434
acs-3	178677
aldo-2	175827
alh-10	180979
aqp-8	180744
arrd-10	174936
arrd-14	175021
best-24	176110
brp-1	176637
cah-4	181478
cal-5	192083
cat-4	179472
catp-1	173307
cbl-1	172759
cbs-1	181215
cdo-1	180434
chw-1	184848
clec-1	178958
clec-146	175004
cnc-7	180337
col-101	176854
col-103	176901
col-122	177789
col-160	179804
col-178	181307
col-179	181308
col-181	181378
col-80	174652
col-95	176602
coq-1	172190
cth-2	174155
cysl-2	175107
dao-3	181065
dcar-1	259679
dhp-1	172464
elt-3	181503
eor-1	177249
far-7	173421
fat-2	178293
fmo-2	177958
fmo-3	176491
gfrp-1	4363077
ghi-1	191210
glc-1	180086
gly-6	175558
grd-10	184239
grd-3	177109
grd-5	179244
gst-36	187645
gst-42	183911
hgo-1	172726
hpd-1	176473
hsp-43	180895
idh-1	177775
ins-33	189313
klf-1	175404
klf-3	191713
kynu-1	180883
lin-31	173740
maa-1	176612
mak-1	174398
mxl-3	181457
nac-1	181585
nas-11	180938
nas-9	178875
nekl-2	191199
nekl-3	181398
nhr-114	178821
nhr-43	178121
nhr-5	191717
nhr-97	177810
nlp-28	181845
nlp-31	178804
osm-11	181772
osm-7	176790
pah-1	174401
pcbd-1	188368
pmt-1	173901
pmt-2	178854
poml-3	6418581
pqn-92	190711
prdx-2	266858
qdpr-1	176762
ras-2	175625
rei-1	175526
rpia-1	175995
sams-1	181370
nhr-5	nhr-5
sod-1	174141
srp-2	178586
sta-2	3565291
swt-3	177972
tatn-1	181574
tdo-2	175836
ttr-33	259631
ttr-59	188262
twk-34	180054
tyr-1	176105
tyr-4	172263
ugt-13	186766
ugt-63	182223
vglu-2	176441
vglu-3	176442
vha-10	172216
vha-11	177017
vha-12	180692
vha-13	3564970
vha-14	176338
vha-15	180534
vha-5	177626
vha-8	177442
vha-9	174596
zip-3	189280
zip-9	179516
ztf-16	180756
zyg-11	174284

## Sheet: intestine
Gene	entrez
B0280.7	175992
B0310.6	24104124
B0507.1	179256
C02E7.6	178885
C02E7.7	178884
C04G6.10	173879
C04G6.7	173878
C06G1.2	182337
C08E3.1	182395
C08E3.13	182405
C14F11.6	180896
C18E9.7	174432
C18H9.6	182809
C26B2.8	182930
C32H11.5	183129
C33H5.13	183188
C45B2.2	180877
C49C8.5	177668
C53C9.2	181031
D1054.9	179495
D2092.8	172380
D2096.6	177633
E01G6.1	181387
F01D5.5	184058
F08G2.5	184201
F09B12.3	181605
F14F3.4	3565964
F14F9.4	178901
F15D4.5	174969
F20B10.3	184715
F21C10.18	24104465
F22H10.2	184872
F23A7.4	184879
F23A7.8	3896896
F26F12.4	178975
F30H5.3	175207
F33H12.7	6418627
F35A5.4	185249
F40E10.5	185535
F41E6.11	179245
F41F3.3	178856
F41G3.3	3564882
F43G6.16	13187267
F45B8.3	181589
F46G10.1	185875
F49E10.2	180855
F53A9.1	186142
F53A9.6	186145
F53A9.7	186146
F54E2.1	178742
F56C9.7	176037
F56D2.3	175769
H23N18.5	186770
H42K12.3	180474
K02E11.10	259661
K04H4.2	176315
K08D12.8	13192261
K09C8.9	13222680
K09D9.1	187208
K10C2.1	180915
K10D3.4	172452
M02G9.2	187405
M110.9	3564934
R01E6.2	187505
R02F11.1	178870
R12A1.3	178632
R12E2.14	172001
R12E2.15	172000
R12E2.7	172002
R13H4.8	3565494
T01B7.8	187933
T02C5.1	180568
T03D8.6	180364
T05E12.6	180136
T06D8.3	174710
T06E4.10	188180
T06E4.14	6418768
T06E4.8	179349
T06E4.9	179348
T17H7.1	175228
T19D12.4	174096
T20B6.3	188630
T20G5.8	188660
T22B2.6	188720
T23F6.1	178227
T24C12.4	188848
T24C4.4	188845
T24F1.7	3565098
T25E4.1	173943
W02F12.8	13213356
W03F8.6	189159
W05H9.1	180901
Y102A11A.5	180516
Y102A11A.7	190859
Y37D8A.16	176709
Y43F8B.3	180277
Y47D3B.6	176573
Y47D7A.13	178841
Y47D7A.15	260235
Y48G8AL.12	171698
Y51H7C.13	190180
Y56A3A.7	176629
Y58A7A.5	190383
Y75B7AR.1	178630
ZC101.1	175127
ZC449.5	180776
ZK1025.3	191492
ZK154.1	181038
ZK180.5	177218
ZK470.6	191326
ZK6.11	191209
ZK662.2	181660
abu-1	181800
abu-13	175970
abu-14	174464
alh-13	181417
asns-1	184935
asp-10	182635
bli-1	174653
bli-2	191611
bli-6	177399
cdr-4	259654
chs-2	173405
clc-1	181293
col-10	179298
col-104	176947
col-107	176961
col-109	176988
col-110	177225
col-111	177230
col-117	177694
col-118	177699
col-12	179453
col-120	177748
col-125	178029
col-13	179452
col-130	178193
col-133	186083
col-138	183722
col-14	177559
col-144	179296
col-145	179297
col-146	188178
col-147	179351
col-150	181814
col-154	186300
col-156	186439
col-157	188426
col-161	179812
col-162	179825
col-166	180902
col-167	180907
col-168	180908
col-169	180909
col-17	173839
col-170	353462
col-175	24104282
col-180	181356
col-182	187723
col-3	177695
col-38	174370
col-39	174651
col-41	181610
col-48	171873
col-49	187239
col-60	172445
col-63	172607
col-65	187138
col-71	173695
col-73	184366
col-77	174336
col-79	174650
col-88	175170
col-90	176117
col-91	184269
col-97	176721
cpr-5	178612
cpz-2	179818
cut-2	179823
cyn-17	178969
dao-2	173793
dct-16	180345
dgat-2	180160
dpy-13	177187
dpy-4	178414
dpy-8	180785
eat-20	181641
fipr-11	260084
fipr-6	3565311
fipr-8	182541
fmo-5	178596
grd-6	24104900
grl-16	171649
grl-7	179569
haf-4	171639
haf-7	190115
haf-9	172288
his-18	179267
hpo-6	176965
ifd-2	180430
ifo-1	177505
ifp-1	181182
lgc-27	173802
lgx-1	180825
lin-15A	181663
lin-15B	181662
lon-3	179673
lpr-3	181295
lron-2	179309
lrx-1	192091
lys-2	179429
mlt-10	173445
mlt-11	180352
mlt-9	181607
myo-1	172471
myo-2	181404
nas-14	184247
nas-15	180426
nas-8	183207
nep-1	174787
noah-2	178365
nspb-1	3564940
nspb-10	182088
nspb-11	185265
nspb-12	184261
nspb-2	185448
nspb-3	185443
nspb-4	185446
nspb-6	186682
nspb-7	182086
nspb-9	3564924
ora-1	191739
pbo-4	181285
pcp-3	177740
pgp-1	178215
phat-1	172129
phat-2	172130
phat-4	178812
phg-1	185024
pho-11	174547
pqn-13	178954
pqn-26	183974
pqn-35	173800
pqn-36	181630
pqn-54	187728
pqn-63	188181
qua-1	174319
ram-2	174687
rol-6	174397
rol-8	174226
sdz-24	173457
spp-13	184191
spp-14	181032
spp-7	177326
sptl-2	266646
sqt-1	174731
sqt-2	173382
sym-1	181555
tnc-2	174612
tnt-4	178679
ttr-26	180211
ttr-29	187890
ugt-44	177939
wrt-10	174224

## Sheet: muscle
Gene	entrez
B0001.2	178164
B0310.1	181922
B0379.1	172872
B0513.4	178351
B0545.4	182029
C03H5.5	182182
C04E7.5	6418831
C07E3.9	182374
C09D4.2	182446
C17G1.2	182741
C18B2.3	180651
C25E10.10	182894
C32E12.4	172163
C34C12.9	3565744
C34C6.7	174393
C36C5.5	183261
C39D10.3	181047
C39D10.7	181050
C44B7.5	174124
C46G7.2	177367
C47D12.5	183549
C49A1.10	183591
C50F2.4	183674
C51E3.9	266923
C53B7.2	183744
C53B7.3	180957
D1086.12	259660
E04F6.9	174185
F01F1.3	175826
F10G2.1	179122
F13D11.3	180847
F14F9.5	184485
F14H12.7	184503
F21C10.7	179292
F22E12.1	179460
F25E2.2	180428
F33C8.4	185223
F35A5.1	259699
F35E12.10	179868
F36F2.2	172721
F37H8.5	3564874
F40A3.6	185508
F41B4.1	180952
F41C3.5	173818
F42G10.1	181214
F42H10.3	185685
F44B9.2	176129
F48E3.4	181006
F49E2.1	181176
F54F7.2	186253
F58A3.4	186483
F58H10.1	186556
K02F3.9	175241
K07A1.13	172793
K07C11.3	179199
K08C7.1	177953
K08C7.6	187137
K09A9.6	181645
K11D12.11	260212
M05B5.4	172457
R04B3.2	180550
R09E10.2	177919
R13H4.2	6418761
R160.3	187912
T01D1.4	173403
T01E8.1	174584
T03G6.3	180561
T04A6.1	188035
T04G9.7	180424
T07D4.2	174416
T16G12.4	188556
T23E7.2	181789
T28B4.1	180930
VC5.2	179097
W03G11.3	189173
W04A4.2	189178
W04G3.13	13222717
W06A7.2	189231
W09C3.7	172083
Y102E9.5	3896742
Y32F6A.5	179459
Y37D8A.2	176698
Y4C6B.7	3565268
Y51A2D.14	180214
Y55F3BR.6	190317
Y57G11C.40	3564799
Y66C5A.1	3565864
Y69E1A.5	190551
Y71H2B.4	175381
ZC412.3	3565691
ZC449.8	13220478
ZK105.1	191220
ZK1058.9	175508
ZK1321.4	174538
ZK809.8	178093
ZK930.2	191463
act-4	180767
best-20	189623
bgal-1	188583
btb-14	174877
cex-1	186376
cht-3	177464
clec-149	186903
clik-1	179069
col-135	3565413
cpn-3	171986
cpna-2	174250
ddo-3	184746
dlc-2	187460
dod-23	186056
efn-3	184508
emb-9	176314
ent-2	181648
epi-1	177956
far-1	176283
far-2	176284
far-6	189096
fgt-1	173525
fmo-4	179845
gei-15	24104769
gsnl-1	179328
heh-1	175426
him-4	181187
hpo-15	178934
hsp-12.3	177777
hum-7	171650
idhg-2	172430
ins-23	191691
inx-8	178101
inx-9	191694
lam-1	177292
lam-2	180980
lbp-2	180617
lbp-3	180615
lec-5	173992
let-2	181708
lim-6	180459
madd-3	3565068
mig-6	179162
mlc-2	181775
mlc-3	175768
mup-2	180914
nrf-5	179879
oig-2	189675
oig-3	190105
ost-1	176931
pat-10	172127
perm-2	176933
perm-4	176932
pho-14	188466
pqn-22	177369
pqn-24	183891
pqn-48	173743
rnh-1.3	182229
rsu-1	175451
sdz-27	178027
sgn-1	184162
skpo-1	174340
spon-1	174169
spp-10	177651
spp-15	172318
sri-40	191914
srp-1	178585
swm-1	182893
tag-18	180662
tag-243	188039
tbh-1	181639
test-1	177010
tni-3	180127
tnt-2	181119
tsp-8	181567
ttn-1	266969
ttr-17	178003
ttr-24	180209
ttr-36	3896869
ttr-47	179270
ttr-5	176312
ttr-54	188506
twk-18	181139
twk-24	179682
twk-5	174756
twk-8	177727
unc-15	172491
unc-27	181124
unc-87	172397
unc-89	171990
unc-95	173301
unc-97	180827
zig-12	181123
zig-7	172096

## Sheet: neurons
Gene	entrez
AH9.6	4363123
B0228.6	174251
B0252.8	3896725
B0294.1	181908
B0294.3	181910
B0361.4	181940
B0432.14	3896728
C01B7.5	182058
C01G10.16	3564842
C01G5.25	24104148
C02B10.3	177284
C02B8.3	182104
C03H5.6	182183
C04E6.13	353442
C04F12.5	182226
C05E7.3	182267
C06E4.2	182325
C06E7.2	177353
C07A12.2	180726
C08D8.7	24104187
C08G5.7	3565208
C09G1.5	266897
C10C5.7	3565228
C12D5.3	182534
C12D5.5	182536
C13A10.2	182559
C15C7.4	182633
C17H12.10	177446
C18A11.2	182760
C24B5.1	179301
C30G7.2	3565427
C30H6.10	259607
C33A12.4	177784
C34F6.9	181312
C35B1.7	177172
C35D10.12	183240
C35E7.11	3565137
C35E7.2	172992
C39D10.2	183336
C40H5.2	183369
C43F9.7	183416
C44B11.4	259494
C45G9.13	259506
C47D2.1	183545
C50C3.5	183642
C50D2.6	3565416
C54C6.5	183767
C54D2.2	183777
C54G6.3	183815
D1007.18	3565784
D1081.4	183928
D2023.3	183945
D2089.3	183962
D2096.9	183967
DH11.5	3565199
E02A10.4	259342
E04D5.5	259462
F01E11.18	13221279
F02A9.1	184071
F02E11.2	184096
F07C3.2	184123
F08G12.8	184213
F09B9.5	259721
F09C3.2	184226
F09E10.7	180488
F09E5.14	259435
F09E8.8	3565694
F10E7.9	174167
F10E9.1	184303
F13E9.11	177980
F13E9.15	4927023
F14B6.2	173102
F14D7.12	6418724
F14F11.2	184487
F15A4.5	174886
F17C11.2	184614
F18E9.1	184646
F19C7.8	177226
F22F1.3	184851
F23C8.13	171799
F23D12.3	184896
F25E5.16	179131
F26A10.1	184956
F26E4.3	172827
F26F12.8	3896849
F27B10.1	259627
F28D1.6	185062
F28E10.1	177223
F28F9.3	185078
F29A7.4	185104
F29B9.12	3896767
F29G6.2	185121
F32B4.5	185191
F34D10.6	175486
F34H10.2	185244
F35H10.2	185328
F35H12.1	185333
F35H12.6	266942
F36H9.7	185390
F37A8.5	175512
F38B2.2	185449
F38E9.6	185470
F39B2.8	3565054
F40A3.4	185507
F41B4.2	180953
F41E7.7	185625
F41G3.1	174115
F42G9.4	185678
F45D3.2	179716
F45E1.2	185791
F46C5.4	185845
F47D12.3	185932
F49H12.3	180521
F53A2.1	186137
F53F4.17	4926995
F53F8.7	7040165
F54E4.3	181559
F54G2.1	180562
F55C12.4	173995
F55C7.2	186288
F55D10.4	186306
F55H2.5	186343
F56F10.2	186404
F57A8.1	179399
F57B7.2	186438
F58B4.3	186495
F58H1.7	179636
F59B8.1	177774
F59D12.1	181656
F59F3.6	259724
H01G02.3	259600
H03A11.2	181617
H04M03.12	186690
H05L03.3	180857
H06I04.1	175416
H10D18.1	186713
H10E21.5	175169
H11E01.3	180495
H17B01.5	3896727
H32K21.1	3565573
K01F9.2	3565085
K02B12.9	4362997
K02D3.1	186872
K02F2.5	183992
K03A1.4	186916
K03B4.4	186919
K03H6.5	186965
K06A4.2	187046
K07C5.9	259644
K07D4.4	187108
K07D4.9	259430
K08E7.6	178212
K09E4.4	175063
K09E9.4	3564761
K09F5.6	4363114
K09F6.10	173586
K09F6.13	24104743
K09F6.9	173585
K10C9.1	187259
K10G9.2	187283
K11H12.9	176889
M02E1.2	180387
M03C11.1	176456
M03D4.3	187421
M03F8.6	187432
M04B2.6	3565135
M04D8.7	187446
M153.4	3565375
M176.5	174497
R02F11.2	187531
R04E5.7	181126
R05C11.4	3896789
R05D7.3	173095
R08D7.5	187699
R102.1	187891
R102.2	177959
R10E11.5	187778
R10F2.4	187785
R10H10.4	187788
R11D1.12	6418759
R12B2.8	3896755
R12G8.1	187844
R13A1.5	187851
R13A5.9	176073
R173.3	180973
R74.10	13189130
T01G1.2	178058
T02C12.5	13189083
T02E1.8	3564953
T02E9.5	179568
T04A8.18	7040191
T04C12.3	179532
T04C9.1	175849
T05A8.3	173615
T05C1.2	188113
T05H10.8	188154
T07C12.15	7040141
T10B5.4	178668
T10B9.9	174539
T10G3.8	6418772
T19C3.3	188586
T20B3.14	259674
T20F10.5	259396
T21C12.3	176474
T22F7.4	188758
T23B12.11	3896851
T23C6.4	181754
T24D5.2	188850
T24F1.5	174729
T25B6.4	188876
T26C5.5	259454
T27A10.2	180648
T27C4.1	178789
T28D6.4	176566
VM106R.1	24104964
W02C12.2	177155
W03G11.4	181377
W05E10.2	189214
W05H12.1	173210
Y106G6G.2	172898
Y106G6G.6	3564769
Y116F11A.6	180296
Y119C1B.6	191029
Y12A6A.2	181483
Y37E11AL.6	189621
Y38E10A.20	189665
Y41C4A.6	176599
Y43C5A.7	4927022
Y43F8A.1	189865
Y43F8C.11	189879
Y44A6D.2	180360
Y48C3A.5	174973
Y48G10A.6	3564861
Y53F4B.12	190214
Y53F4B.51	13188094
Y54E2A.10	175137
Y54G11A.1	190294
Y54G2A.26	177079
Y55B1BR.6	3565001
Y57G11C.22	178409
Y57G11C.45	3565782
Y58G8A.5	3896862
Y64G10A.6	178376
Y64G10A.7	178377
Y67D8C.9	177088
Y6B3B.7	189369
Y71H2AM.10	175386
Y72A10A.1	190620
Y73B6BL.35	177402
Y75B8A.11	190703
Y76B12C.8	259555
Y95B8A.12	190810
Y9C12A.1	189424
Y9C2UA.1	189405
ZC410.5	177728
ZC443.4	191170
ZC487.1	179065
ZC581.9	172385
ZK1067.4	191517
ZK265.7	191278
ZK287.1	179356
ZK287.3	191281
ZK353.10	4363052
ZK370.6	191302
ZK622.5	4363029
ZK652.8	191377
ZK721.3	191416
ZK721.4	191417
ZK742.7	13213791
ZK971.1	174592
acc-4	176778
ace-3	175076
acy-1	175622
add-1	180760
aex-3	180420
aex-6	173223
ags-3	180801
akap-1	175898
apd-3	173701
apt-9	189194
arrd-22	188642
arrd-26	187599
arrd-4	174540
arrd-6	185541
ast-1	173749
avr-14	172270
ben-1	175461
bpl-1	174039
cab-1	181382
cah-1	186231
cah-2	174218
cah-6	189049
cal-4	177945
calf-1	180342
capa-1	189521
casy-1	174006
cat-1	180837
cca-1	181045
cccp-1	176674
cdka-1	188812
ceh-27	185853
ceh-44	175372
ceh-48	182756
cfi-1	188793
cho-1	178274
ckk-1	182278
ckr-2	175341
clh-2	174738
cls-3	176298
cmk-1	176989
cpna-4	190681
cpx-1	190666
ctbp-1	180853
daf-19	174577
daf-28	191014
daf-38	178443
daf-7	175237
deg-3	3565200
des-2	179574
dgk-1	180452
dhs-17	178990
dmsr-1	186437
dmsr-2	189527
dmsr-7	178922
dop-1	180714
dop-2	179347
dop-5	179571
drn-1	183765
droe-4	179895
dyn-1	181644
eat-4	176291
egl-10	179707
egl-18	176992
egl-2	178624
egl-21	177940
egl-3	179412
ehs-1	173985
elt-6	176993
erp-1	180667
eva-1	173355
exp-2	179003
flp-1	177737
flp-11	180741
flp-12	180732
flp-13	177547
flp-14	176708
flp-15	176803
flp-16	174967
flp-17	178498
flp-18	180587
flp-19	181260
flp-2	181222
flp-20	181165
flp-21	182944
flp-22	172665
flp-24	182824
flp-25	3564828
flp-26	259712
flp-27	182924
flp-28	181220
flp-3	181221
flp-32	187533
flp-33	259401
flp-34	178606
flp-4	174568
flp-5	181104
flp-6	179327
flp-7	180854
flp-8	181583
flp-9	178232
flr-2	186548
fmi-1	179788
fox-1	180549
frm-3	181346
frm-8	175428
frm-9	266949
frpr-14	187113
gar-1	180922
gar-2	175893
gbb-1	189837
gcy-11	181745
ggr-1	191636
glb-19	3565034
glb-2	182330
glb-22	187832
glb-24	179767
glb-25	188156
glb-27	189091
glb-3	182348
glb-32	190384
glb-33	178627
glb-7	177008
glb-9	182985
glr-1	176204
glr-2	175999
glr-4	174258
glr-5	179251
gopc-1	3565651
grk-2	175223
grl-8	191191
gst-11	187817
gst-40	176900
hot-3	175044
hot-4	175881
hot-9	3896791
ida-1	175807
ilys-4	183853
ins-1	177936
ins-14	3565293
ins-17	175585
ins-18	172600
ins-24	173266
ins-25	3565916
ins-26	173268
ins-28	3565006
ins-3	191684
ins-30	173267
ins-5	191686
ins-6	191687
ins-9	3564850
inx-1	180968
irk-1	180944
itsn-1	178491
jip-1	173513
jnk-1	177460
kcnl-2	172602
klp-11	177685
klu-1	173366
klu-2	172339
lgc-31	184752
lgc-38	3565717
lgc-47	181193
lgc-50	188633
lim-4	180672
lin-11	172893
lron-5	184307
lurp-1	185748
mab-20	171727
madd-4	172706
maf-1	6418592
magu-3	183676
2017-03-05	174876
max-1	179794
mcp-1	178982
mec-1	188259
mec-12	175419
mec-17	177596
mec-18	180701
mec-2	180826
mec-7	181036
mec-9	179382
mgl-2	172914
mig-1	171677
mod-1	179269
mpz-1	174657
mtd-1	191285
ncs-5	183792
ncs-6	173700
ncx-4	172834
nep-11	173685
neto-1	186950
nfki-1	181625
nlf-1	180454
nlp-1	180661
nlp-10	191733
nlp-11	191566
nlp-13	178826
nlp-14	181137
nlp-15	173174
nlp-18	185219
nlp-21	176570
nlp-3	185978
nlp-35	183138
nlp-37	185966
nlp-38	173209
nlp-41	3564788
nlp-47	185393
nlp-5	185270
nlp-6	188798
nlp-8	172544
nlp-9	178825
nlr-1	178167
npr-25	179570
npr-29	176300
npr-3	182494
npr-4	182684
nrx-1	179503
nsf-1	266842
ntc-1	3896872
odr-2	179098
oig-1	182450
oig-5	259604
olrn-1	181642
pag-3	181588
pdf-1	175963
pdfr-1	175942
pdl-1	191741
peli-1	178959
pgal-1	172108
pghm-1	171746
pho-8	179621
pitp-1	175459
pkc-1	179649
pll-1	187273
plx-2	175101
ptl-1	175230
ptp-4	177898
ptr-5	181764
qui-1	178326
rab-3	173971
rab-37	180696
rbf-1	175943
rga-6	172102
rgef-1	179344
rgs-1	176415
rgs-6	180840
rhgf-1	184419
ric-19	191757
ric-4	179427
rimb-1	189724
sad-1	181471
sbt-1	180366
scd-2	179054
scrm-2	191509
scrm-3	182212
seb-3	181598
ser-4	175322
ser-5	184572
shw-1	174331
sipa-1	179596
slc-17.1	181777
snet-1	182125
sng-1	180995
snn-1	176987
snt-1	174120
snt-3	190698
snt-4	172346
snt-5	178631
snt-6	182427
soap-1	179109
sol-1	172493
sol-2	173336
sro-1	191958
ssr-2	191965
sta-1	178465
sto-2	180802
sto-6	190619
sue-1	184108
sul-2	179194
svop-1	176250
syd-1	174230
syd-9	180985
tag-180	174730
tag-68	172930
tag-80	177539
tag-97	181627
tbb-4	181170
tbc-16	180856
tbc-18	181091
tbc-8	176454
tiam-1	259373
tiar-3	182350
tom-1	172209
trk-1	183575
trp-2	192056
tsp-7	192062
ttr-39	182231
twk-2	188452
twk-29	185828
twk-30	185335
twk-39	182864
twk-40	189006
twk-46	180252
twk-48	3565640
twk-49	187626
twk-7	192073
tyra-2	180970
tyra-3	187427
ubc-17	181979
ubc-22	182322
ubh-1	179039
unc-1	180458
unc-10	180990
unc-103	175527
unc-104	174144
unc-119	176519
unc-13	172497
unc-18	181030
unc-2	180570
unc-25	176713
unc-30	178265
unc-31	178233
unc-4	174544
unc-41	179387
unc-42	192081
unc-44	177366
unc-6	180961
unc-64	176743
unc-7	181608
unc-75	182722
unc-76	180014
unc-77	177379
unc-79	3565180
unc-80	180374
unc-86	176157
unc-9	181443
wdfy-3	178220
xbx-5	188837
xbx-9	179742
zag-1	177144
zfh-2	171670
zig-2	192087
zig-4	181051
zig-5	176527
zig-8	176732
ztf-11	172845
