# Supplementary material for: Transcriptome analysis of adult Caenorhabditis elegans cells reveals tissue-specific gene and isoform expression
Source: PLoS Genet. 2018 Aug 10;14(8):e1007559. doi: 10.1371/journal.pgen.1007559 (PMC6105014; doi:10.1371/journal.pgen.1007559)
Supplement: S13 Table — Adult tissue expression levels of the wild-type worm Class I and Class II IIS-FOXO genes from Tepper et al., 2013. (XLSX) [file pgen.1007559.s022.xlsx]

## Sheet: All
Rank	Gene	WormBase Gene ID	Public Name	Sequence Name	Transcript	hypodermis	intestine	muscle	neurons	Expr_pattern Tissue	Expr_pattern LifeStage	Description Text	entrez	Available Experiments	Experiments Up	Experiments Down	Voting Score	t-value	p-value	FDR	DBE PSAM Affinity	DAE PSAM Affinity	DAF-16 ChIP-seq Hit	PQM-1 ChIP-seq Hit
1	mtl-1	WBGene00003473	mtl-1	K11G9.6	K11G9.6,K11G9.6	5.01738	2.41447	-1.63531	1.83298	intestine,pharynx,terminal bulb	all stages Ce	mtl-1 encodes one of two C. elegans metallothioneins, small, cysteine-rich, metal-binding proteins; MTL-1 functions in metal detoxification and homeostasis and in stress adaptation; in addition, mtl-1 plays a role in regulating growth and fertility; mtl-1 is constitutively expressed in the terminal bulb of the pharynx and expression is induced in larval intestinal cells following exposure to cadm…	179060	46	45	1	44.17	12.52	0	0	1	1.58	N	Y
2	F48D6.4	WBGene00018602	F48D6.4	F48D6.4	F48D6.4a,F48D6.4b,F48D6.4c,F48D6.4b,F48D6.4c,F48D6.4a	7.10586	6.01587	4.41429	2.37542	N.A.	N.A.	RNA sequencing and microarray studies indicate that F48D6.4 is affected by Ethanol, Methylmercuric chloride, Rotenone, D-glucopyranose, Chlorpyrifos, Cry5B, Quercetin, Colistin, and Ag nanoparticles; tiling array, RNA sequencing, and microarray studies indicate that F48D6.4 is enriched in the intestine, pharyngeal muscle cell, germ line, and muscle cell and in the ASER neurons.	180697	46	45	1	43.09	12.21	0	0	0.26	1.74	N	Y
3	hacd-1	WBGene00019978	hacd-1	R09B5.6	R09B5.6,R09B5.6	5.25919	5.21474	-0.479015	1.26859	N.A.	N.A.	hacd-1 is an ortholog of human HADH (hydroxyacyl-CoA dehydrogenase); hacd-1 is predicted to have 3-hydroxyacyl-CoA dehydrogenase activity and NAD+ binding activity, based on protein domain information.	178638	45	44	1	41.55	11.9	0	0	1.05	1.74	N	N
4	ftn-1	WBGene00001500	ftn-1	C54F6.14	C54F6.14,C54F6.14.1,C54F6.14.2	0.8082	1.70367	-5.17681	-1.70715	intestine,pharyngeal-intestinal valve	adult Ce,L1 larva Ce,L2 larva Ce,L3 larva Ce,L4 larva Ce,larva Ce	ftn-1 encodes one of two C. elegans ferritin heavy chain homologs; ftn-1 activity is essential for normal lifespan under iron stress conditions and, in addition, has been reported to be essential for embryogenesis; an ftn-1::gfp reporter is expressed in the intestine at all stages of development and its expression, as well as that of ftn-1 mRNA, increases under iron stress conditions and in the b…	179138	46	44	2	41.47	11.75	0	0	2.01	1.84	Y	Y
5	lys-7	WBGene00003096	lys-7	C02A12.4	C02A12.4,C02A12.4	5.90022	6.31105	0.327042	3.20476	head neuron,intestine,rectal gland cell	N.A.	lys-7 encodes an enzyme homologous to an antimicrobial lysozyme encoded by the LYS4 gene of the protozoan parasite Entamoeba histolytica; LYS-7 functions in the innate immune response as an antimicrobial enzyme that, by homology, hydrolyzes the 1,4-beta-linkages between N-acetyl-D-glucosamine and N-acetylmuramic acid in peptidoglycan heteropolymers of prokaryotic cell walls; loss of lys-7 activit…	178772	44	42	2	40.3	11.67	0	0	1.81	1.27	N	Y
6	dod-6	WBGene00011869	dod-6	T20G5.7	T20G5.7,T20G5.7	8.34353	9.14265	5.93476	6.90187	N.A.	N.A.	dod-6 is involved in determination of adult lifespan.	176433	44	41	3	39.44	11.42	0	0	0.37	1.23	N	N
7	dod-3	WBGene00016052	dod-3	C24B9.9	C24B9.9,C24B9.9	2.46897	-3.0182	-4.48409	-3.09235	N.A.	N.A.	dod-3 is an ortholog of human DEPDC1B (DEP domain containing 1B) and DEPDC1 (DEP domain containing 1); dod-3 is involved in determination of adult lifespan.	178737	44	41	3	38.68	11.2	0	0	1.36	2.08	Y	N
8	btb-16	WBGene00018195	btb-16	F39E9.2	F39E9.2,F39E9.2:wp88,F39E9.2	2.92262	1.86191	-3.12355	-1.87556	N.A.	N.A.	Microarray and RNA sequencing studies indicate that btb-16 is affected by Tunicamycin, Mianserin, Ethanol, Resveratrol, Cry5B, Humic substances, single-walled carbon nanotubes, Colistin, and Dafa#1; tiling array and microarray studies indicate that btb-16 is enriched in the intestine and in the dopaminergic, PVD, and OLL neurons.	173674	44	43	1	38.26	11.07	0	0	1.46	1.71	Y	Y
9	M60.4	WBGene00019780	M60.4	M60.4	M60.4a,M60.4b,M60.4:wp100,M60.4b.1,M60.4b.2,M60.4b.3,M60.4a	7.00529	5.84535	7.91851	5.13243	N.A.	N.A.	M60.4 is an ortholog of human CMTM8 (CKLF like MARVEL transmembrane domain containing 8), MARVELD1 (MARVEL domain containing 1), MALL (mal, T-cell differentiation protein like), mal (mal, T-cell differentiation protein) and MAL2 (mal, T-cell differentiation protein 2 (gene/pseudogene)); microarray and RNA sequencing studies indicate that M60.4 is affected by Aldicarb, Rotenone, Tunicamycin, D-glu…	187465	46	45	1	39	11.03	0	0	2.01	0	N	N
10	gpd-3	WBGene00001685	gpd-3	K10B3.7	K10B3.7,K10B3.7.1,K10B3.7.2	10.6034	8.50888	9.92789	8.70223	Cell,gonad	adult Ce,embryo Ce,L1 larva Ce,L2 larva Ce,L3 larva Ce,L4 larva Ce	gpd-3 encodes a predicted glyceraldehyde 3-phosphate dehydrogenase that affects embryonic viability; GPD-3 interacts with LIN-2 in two-hybrid assays.	180601	44	43	1	36.73	10.62	0	0	0.4	0.89	N	N
11	poml-3	WBGene00077701	poml-3	E01A2.10	E01A2.10,E01A2.10	4.97013	2.34567	1.89032	-1.31558	N.A.	N.A.	poml-3 is an ortholog of human PON3 (paraoxonase 3), PON2 (paraoxonase 2) and PON1 (paraoxonase 1); microarray and RNA sequencing studies indicate that poml-3 is affected by daf-16, eat-2, hlh-30, clk-1, daf-2, cco-1, jmjd-3.1, jmjd-1.2, hrp-2, daf-12, dpy-21, sir-2.1, dpy-9, dpy-10, osm-7, osm-11, hcf-1, tdp-1, and nuo-6; RNA sequencing and microarray studies indicate that poml-3 is affected by …	6418581	37	37	0	33.64	10.62	0	0	0.76	1.84	Y	Y
12	gpd-2	WBGene00001684	gpd-2	K10B3.8	K10B3.8,K10B3.8.1,K10B3.8.2	10.8156	7.85503	9.00251	9.18667	body wall musculature,Cell,head,hypodermis,intestine,muscle cell,nervous system,neuron,reproductive system,tail neuron,vulval muscle	adult Ce,embryo Ce,L1 larva Ce,L2 larva Ce,L3 larva Ce,L4 larva Ce,larva Ce	gpd-2 encodes one of four C. elegans glyceraldehyde-3-phosphate dehydrogenases (GAPDHs); by homology, GPD-2 is predicted to reversibly catalyze the oxidation and phosphorylation of glyceraldehyde-3-phosphate to 1,3-diphosphoglycerate during glycolysis; in C. elegans, GPD-2 and GPD-3 constitute the major GAPDH isoenzymes and are expressed at highest levels during postembryonic development, primari…	3565504	44	43	1	36.7	10.61	0	0	0.4	0.89	N	N
13	T02B5.1	WBGene00011362	cest-1	T02B5.1	T02B5.1,T02B5.1:wp51,T02B5.1	-6.70668	0.854264	-5.85756	-3.54933	N.A.	N.A.	cest-1 is an ortholog of human NLGN2 (neuroligin 2), NLGN3 (neuroligin 3), NLGN1 (neuroligin 1), NLGN4Y (neuroligin 4, Y-linked) and NLGN4X (neuroligin 4, X-linked); microarray and RNA sequencing studies indicate that cest-1 is affected by Hydrogen sulfide, Ethanol, Methylmercury hydroxide, Methylmercuric chloride, Tunicamycin, Cholestanol, Resveratrol, Atrazine, Chlorpyrifos, Diazinon, Humic sub…	179915	43	41	2	35.28	10.32	0	0	0.23	1.61	N	N
14	acs-17	WBGene00016716	acs-17	C46F4.2	C46F4.2,C46F4.2.1,C46F4.2.2,C46F4.2.3	3.83858	4.2068	3.8836	1.42861	N.A.	N.A.	acs-17 is an ortholog of human ACSL3 (acyl-CoA synthetase long-chain family member 3) and ACSL4 (acyl-CoA synthetase long-chain family member 4); acs-17 is involved in determination of adult lifespan and embryo development; acs-17 is predicted to have catalytic activity, based on protein domain information.	180859	45	43	2	36.07	10.31	0	0	1	0.61	N	N
15	Y6G8.2	WBGene00012404	Y6G8.2	Y6G8.2	Y6G8.2a,Y6G8.2:wp51,Y6G8.2:wp184,Y6G8.2:wp204,Y6G8.2b,Y6G8.2c,Y6G8.2a	-0.19802	1.12615	-5.54681	-2.30258	N.A.	N.A.	Microarray and RNA sequencing studies indicate that Y6G8.2 is affected by Tunicamycin, D-glucopyranose, and Resveratrol; microarray studies indicate that Y6G8.2 is enriched in the PVD and OLL neurons.	180157	41	40	1	34.37	10.3	0	0	1.4	1.97	N	Y
16	fat-5	WBGene00001397	fat-5	W06D12.3	W06D12.3,W06D12.3	2.08988	2.69061	-1.0561	-1.90073	intestine,pharynx,tail	adult Ce,L1 larva Ce,L2 larva Ce,L3 larva Ce,L4 larva Ce	fat-5 encodes a delta-9 fatty acid desaturase that is predicted to be mitochondrial; when expressed heterologously in S. cerevisiae, FAT-5 rescues the fatty acid auxotrophy of the yeast delta-9 desaturase mutant ole1.	180162	44	42	2	35.57	10.28	0	0	0.6	0	Y	N
17	dao-3	WBGene00000929	dao-3	K07E3.3	K07E3.3,K07E3.3	6.86845	4.52843	2.8251	3.12665	hypodermis,nervous system,phasmid neuron,tail neuron	larva Ce	dao-3 encodes a protein containing tetrahydrofolate dehydrogenase/cyclohydrolase catalytic and NAD(P)-binding domains; by similarity to mammalian enzymes, DAO-3 is predicted to function in one-carbon unit metabolism and thus, in amino acid and nucleotide biosynthesis; dao-3 expression appears to be regulated by daf-2-mediated insulin signaling: microarray experiments suggest that it is upregulate…	181065	46	42	4	36.2	10.23	0	0	0.98	0.27	Y	Y
18	cdr-2	WBGene00008296	cdr-2	C54D10.1	C54D10.1,C54D10.1	0.417865	4.42571	-0.137839	-1.17706	head neuron,nervous system,pharynx,rectal epithelium,reproductive system,vulva	adult Ce,larva Ce	cdr-2 encodes a predicted transmembrane protein that is a member of the CDR (cadmium responsive) family of proteins; cdr-2 expression is increased upon exposure to cadmium ions, and loss of cdr-2 activity results in increased sensitivity to cadmium.	183779	45	41	4	35.47	10.13	0	0	0.4	0.61	Y	Y
20	ugt-41	WBGene00017336	ugt-41	F10D2.11	F10D2.11,F10D2.11:wp112,F10D2.11	3.46154	2.83209	0.997688	-0.961633	N.A.	N.A.	ugt-41 is an ortholog of human UGT3A2 (UDP glycosyltransferase family 3 member A2) and UGT3A1 (UDP glycosyltransferase family 3 member A1); ugt-41 is predicted to have transferase activity, transferring hexosyl groups, based on protein domain information.	184295	43	40	3	34.33	10.04	0	0	2.13	0.61	Y	N
21	C08E8.4	WBGene00007440	C08E8.4	C08E8.4	C08E8.4,C08E8.4:wp193,C08E8.4	1.97778	3.60757	-2.92704	1.65746	N.A.	N.A.	C08E8.4 is involved in innate immune response.	182409	39	36	3	32.19	9.89	0	0	2.46	3	Y	Y
22	cyp-35B1	WBGene00019472	cyp-35B1	K07C6.4	K07C6.4,K07C6.4:wp252,K07C6.4	0.734352	-0.091716	-5.64462	-3.27794	hypodermal cell,intestine	dauer larva Ce	cyp-35B1 is an ortholog of human CYP21A2 (cytochrome P450 family 21 subfamily A member 2) and members of the CYP2 (Cytochrome P4502) family including CYP2E1; cyp-35B1 is involved in determination of adult lifespan and lipid storage; cyp-35B1 is predicted to have heme binding activity, iron ion binding activity, and oxidoreductase activity, acting on paired donors, with incorporation or reduction …	178803	40	37	3	32.32	9.8	0	0	1.07	0.68	N	N
23	F47B8.2	WBGene00009803	F47B8.2	F47B8.2	F47B8.2,F47B8.2	5.81496	5.09713	5.43744	6.82657	N.A.	N.A.	RNA sequencing and microarray studies indicate that F47B8.2 is affected by Ethanol, Methylmercuric chloride, Mercuric Chloride, Rotenone, Juglone, Atrazine, Fluoranthene, Cry5B, Quercetin, Hydrolyzable Tannins, Humic substances, single-walled carbon nanotubes, Selenium, and Sirolimus; tiling array, RNA sequencing, and microarray studies indicate that F47B8.2 is enriched in the hypodermis and musc…	185895	36	36	0	30.39	9.72	0	0	0.87	0.4	N	N
24	F09F7.6	WBGene00017303	F09F7.6	F09F7.6	F09F7.6,F09F7.6	4.42634	3.26335	5.12097	-1.12846	N.A.	N.A.	Microarray and RNA sequencing studies indicate that F09F7.6 is affected by Aldicarb, Hydrogen sulfide, Methylmercuric chloride, Cry5B, Progesterone, Atrazine, Diazinon, Quercetin, Humic substances, single-walled carbon nanotubes, and Sirolimus; tiling array, RNA sequencing, and microarray studies indicate that F09F7.6 is enriched in the hypodermis, intestine, germ line, and muscle cell and in the…	184260	45	42	3	33.86	9.67	0	0	0.67	0.43	Y	Y
25	M01H9.3	WBGene00019719	M01H9.3	M01H9.3	M01H9.3a,M01H9.3b,M01H9.3c,M01H9.3d,M01H9.3e,M01H9.3a,M01H9.3b,M01H9.3c,M01H9.3d.1,M01H9.3d.2,M01H9.3e	6.76452	4.76746	5.95339	6.0877	N.A.	N.A.	RNA sequencing and microarray studies indicate that M01H9.3 is affected by Rotenone, Progesterone, Cry5B, Quercetin, Hydrolyzable Tannins, single-walled carbon nanotubes, and Sirolimus; microarray, tiling array, and RNA sequencing studies indicate that M01H9.3 is enriched in the coelomocytes, germ line, and intestine and in the PVD, OLL, and dopaminergic neurons.	177215	45	43	2	33.84	9.66	0	0	0.18	0	N	Y
26	klo-1	WBGene00016848	klo-1	C50F7.10	C50F7.10,C50F7.10.1,C50F7.10.2	3.91476	3.45816	1.61162	1.30728	excretory canal,excretory cell,intestine	adult Ce,embryo Ce,L1 larva Ce,L2 larva Ce,L3 larva Ce,L4 larva Ce	klo-1 encodes a homolog of the human beta-glucosidase-like proteins KL (klotho; OMIM:604824, variant in coronary artery disease), KLB (beta-klotho; OMIM:611135), GBA3 (cytosolic beta-glucosidase; OMIM:606619), LCT (lactase-phlorizin hydrolase; OMIM:603202, variant in adult lactose tolerance), and LCTL (lactase-like protein); KLO-1 has 76% identity (364/478 residues) to its paralog encoded by klo-…	177557	45	43	2	33.83	9.66	0	0	0.81	0	N	N
27	F38B6.4	WBGene00018174	F38B6.4	F38B6.4	F38B6.4,F38B6.4:wp225,F38B6.4	1.0258	3.60609	-1.29113	-2.12995	intestinal cell	3-fold embryo Ce,adult Ce,L3 larva Ce,L4 larva Ce	F38B6.4 is predicted to have ATP binding activity, phosphoribosylamine-glycine ligase activity, phosphoribosylformylglycinamidine cyclo-ligase activity, and phosphoribosylglycinamide formyltransferase activity, based on protein domain information; F38B6.4 is expressed in the intestinal cell.	180935	45	42	3	33.68	9.61	0	0	0.15	1.51	Y	Y
28	pacs-1	WBGene00015116	pacs-1	B0286.3	B0286.3,B0286.3	3.26593	5.51116	3.34739	3.3542	N.A.	N.A.	pacs-1 is an ortholog of human PAICS (phosphoribosylaminoimidazole carboxylase; phosphoribosylaminoimidazolesuccinocarboxamide synthase); pacs-1 is involved in nematode larval development; pacs-1 exhibits identical protein binding activity.	173772	44	39	5	33.26	9.6	0	0	0.33	1	Y	Y
29	ttr-26	WBGene00013079	ttr-26	Y51A2D.11	Y51A2D.11,Y51A2D.11.1,Y51A2D.11.2	3.14289	7.06904	4.69631	3.10929	N.A.	N.A.	RNA sequencing and microarray studies indicate that ttr-26 is affected by 1-methylnicotinamide, Methylmercuric chloride, Rotenone, Multi-walled carbon nanotubes, D-glucose, Juglone, Resveratrol, Cry5B, Diazinon, Humic substances, Copper sulfate, Colistin, Dafa#1, and Sirolimus; microarray and tiling array studies indicate that ttr-26 is enriched in the pharynx, body wall musculature, and male-spe…	180211	43	39	4	32.71	9.56	0	0	1.6	1	N	N
32	E01G4.3	WBGene00008446	E01G4.3	E01G4.3	E01G4.3a,E01G4.3b,E01G4.3c,E01G4.3c.1,E01G4.3c.2,E01G4.3c.3,E01G4.3a.1,E01G4.3a.2,E01G4.3a.3,E01G4.3b	8.10028	6.14188	6.71933	4.17222	N.A.	N.A.	RNA sequencing and microarray studies indicate that E01G4.3 is affected by Rotenone, D-glucose, Chlorpyrifos, Quercetin, single-walled carbon nanotubes, Paraquat, and Sirolimus; microarray studies indicate that E01G4.3 is enriched in the intestine, muscle cell, and body wall musculature and in neurons including the DD neurons.	174988	42	40	2	32.04	9.47	0	0	0.67	0.75	Y	Y
34	PDB1.1	WBGene00019803	PDB1.1	PDB1.1	PDB1.1a,PDB1.1b,PDB1.1c,PDB1.1:wp153,PDB1.1b,PDB1.1c,PDB1.1a	2.07139	3.99812	-2.73445	-1.53274	N.A.	N.A.	PDB1.1 is involved in innate immune response; PDB1.1 is predicted to have cation transmembrane transporter activity, based on protein domain information.	181016	45	39	6	33.03	9.43	0	0	0.75	0.29	Y	Y
35	pcbd-1	WBGene00020397	pcbd-1	T10B11.1	T10B11.1,T10B11.1:wp154,T10B11.1	6.73489	3.6933	4.39338	4.67226	anterior hypodermis,head,hyp7 syncytium,neuron,pharyngeal muscle cell,tail hypodermis	N.A.	pcbd-1 is orthologous to the human gene PTERIN-4-ALPHA-CARBINOLAMINE DEHYDRATASE (PCBD or TCF1; OMIM:126090), which when mutated leads to hyperphenylalaninemia with primapterinuria.	188368	45	45	0	32.54	9.28	0	0	0.76	0.43	Y	N
36	cyp-34A9	WBGene00015044	cyp-34A9	B0213.15	B0213.15a,B0213.15b,B0213.15c,B0213.15d,B0213.15:wp153,B0213.15d,B0213.15a,B0213.15b,B0213.15c	2.71161	1.33311	-1.06426	-2.24746	intestine	adult Ce,larva Ce	cyp-34A9 is an ortholog of human CYP21A2 (cytochrome P450 family 21 subfamily A member 2) and members of the CYP2 (Cytochrome P4502) family including CYP2E1; cyp-34A9 is involved in determination of adult lifespan; cyp-34A9 is predicted to have heme binding activity, iron ion binding activity, and oxidoreductase activity, acting on paired donors, with incorporation or reduction of molecular oxyge…	181851	44	41	3	32.11	9.27	0	0	0.3	1.45	N	Y
37	sodh-1	WBGene00010790	sodh-1	K12G11.3	K12G11.3,K12G11.3	9.99921	7.25371	8.38458	5.84543	hypodermis,intestine,muscle cell,neuron	N.A.	sodh-1 is involved in determination of adult lifespan; sodh-1 is predicted to have oxidoreductase activity, based on protein domain information; sodh-1 is expressed in the muscle cell, hypodermis, nervous system, and the intestine.	179627	46	40	6	32.79	9.25	0	0	1.16	1	Y	Y
38	ttr-44	WBGene00008341	ttr-44	C56A3.2	C56A3.2a,C56A3.2b,C56A3.2b,C56A3.2a	3.3596	5.09365	0.923458	3.55442	N.A.	N.A.	Microarray and RNA sequencing studies indicate that ttr-44 is affected by Methylmercuric chloride, Bisphenol A, Neurotoxins, Chlorpyrifos, Cry5B, Quercetin, R24, Paraquat, Dafa#1, Multi-walled carbon nanotubes, and Ethosuximide; tiling array and RNA sequencing studies indicate that ttr-44 is enriched in the intestine and germ line and in the ASER neurons.	179835	42	38	4	31.23	9.23	0	0	1.37	2.36	N	Y
39	W01A11.1	WBGene00020909	W01A11.1	W01A11.1	W01A11.1a,W01A11.1b,W01A11.1a,W01A11.1b	6.71119	4.23376	5.38365	3.9727	anal sphincter muscle,body wall musculature,gon_herm_dtc_A,gon_herm_dtc_P,head neuron,intestine,nerve ring,nervous system,pharyngeal-intestinal valve,pharynx,reproductive system,spermatheca,spermathecal-uterine junction,uterine muscle,ventral cord neuron	adult Ce,larva Ce	W01A11.1 is an ortholog of human EPHX1 (epoxide hydrolase 1); W01A11.1 is predicted to have catalytic activity, based on protein domain information; W01A11.1 is expressed in the pharynx, nervous system, reproductive system, pharyngeal-intestinal valve, intestine, anal sphincter muscle, and the body wall musculature.	179036	45	41	4	32.3	9.22	0	0	0	0	N	N
40	sip-1	WBGene00004798	sip-1	F43D9.4	F43D9.4,F43D9.4	9.48467	7.78227	8.25388	6.17322	gonad	adult Ce,adult hermaphrodite Ce,embryo Ce	sip-1 encodes a member of the small heat shock family of proteins; loss of sip-1 function via antisense or large-scale RNAi experiments results in embryonic lethality and in a small but reproducible reduction in lifespan in otherwise long-lived animals, respectively, suggesting that sip-1 plays a role in embryonic development as well as regulation of adult lifespan; in addition, expression of sip…	176471	41	40	1	30.71	9.19	0	0	2	0.73	Y	N
41	sod-3	WBGene00004932	sod-3	C08A9.1	C08A9.1,C08A9.1	5.10823	3.45136	4.47682	5.28066	Cell,head,intestine,pharynx,tail,vulva,vulval muscle	1-day post-L4 adult hermaphrodite Ce,6-days post-L4 adult hermaphrodite Ce,dauer larva Ce	sod-3 encodes a iron/manganese superoxide dismutase, predicted to be mitochondrial, that might defend against oxidative stress and promote normal lifespan; sod-3 mRNA levels are diminished by mutation of daf-16 and chromatin immunoprecipitation (ChIP) studies demonstrate that DAF-16 can directly bind the sod-3 promoter; heterologously expressed SOD-3 in E. coli protects against methyl viologen-in…	181748	46	41	5	32.17	9.07	0	0	3.4	0.42	Y	N
42	F45D11.1	WBGene00018448	F45D11.1	F45D11.1	F45D11.1:wp90,F45D11.1:wp251	-0.415992	-2.22439	-4.68871	-4.59717	N.A.	N.A.	Microarray and RNA sequencing studies indicate that F45D11.1 is affected by ets-4, lin-15B, daf-16, nhr-8, prg-1, clk-1, daf-2, ham-3, swsn-2.2, jmjd-1.2, hsf-1, let-418, set-25, met-2, mys-1, daf-12, dpy-21, sir-2.1, slr-2, and tax-6; microarray studies indicate that F45D11.1 is affected by Hydrogen sulfide, Tryptophan, Progesterone, Chlorpyrifos, Diazinon, Quercetin, Sirolimus, Allantoin, and A…	185779	38	37	1	29.14	9.06	0	0	1.09	1.82	N	Y
43	C25E10.8	WBGene00016097	C25E10.8	C25E10.8	C25E10.8,C25E10.8	4.79872	4.73534	6.0781	3.41422	intestine	N.A.	C25E10.8 encodes a putative secreted TIL-domain protease inhibitor paralogous to SWM-1, ISL-1, and the products of 11 other C. elegans genes; C25E10.8 and its relatives are collectively similar to other TIL-domain protease inhibitors from nematodes, insects, and vertebrates; despite both swm-1 and C25E10.8 being mutated by the swm-1(ok1193) deletion, transgenic rescue of swm-1(ok1193) by SWM-1 al…	182892	46	45	1	31.86	8.98	0	0	1.19	1.61	Y	N
44	icl-1	WBGene00001564	icl-1	C05E4.9	C05E4.9a,C05E4.9b,C05E4.9b,C05E4.9a.1,C05E4.9a.2	8.6029	8.21296	8.59731	4.79195	hypodermal cell,intestine,pharynx	L3 larva Ce	icl-1 encodes a predicted isocitrate lyase/malate synthase, an enzyme known to function in the glyoxylate cycle; ICL-1 was identified in a screen for proteins that interact with GEX-3, a homolog of human HEM-2 which is required for embryonic development; ICL-1 appears to act downstream of DAF-16 to influence lifespan.	178583	45	39	6	31.47	8.97	0	0	1.19	0.13	N	N
45	stdh-1	WBGene00007363	stdh-1	C06B3.4	C06B3.4,C06B3.4	1.97639	3.21123	3.97309	3.95104	body region,body wall musculature,dorsal nerve cord,head,head neuron,intestine,lateral nerve cord,muscle cell,nerve ring,nervous system,neuron,tail,tail neuron,ventral cord neuron	adult Ce,larva Ce	stdh-1 encodes a putative steroid dehydrogenase required for normally short lifespan; STDH-1 is orthologous to human HSD17B3 (OMIM:605573, mutated in pseudohermaphroditism), HSD17B12 (OMIM:609574), and HSDL1, and paralogous to LET-767 and STDH-2/-4; STDH-1 is expressed in larval intestine, and in both larval and adult body wall muscle and neurons.	182291	43	41	2	30.58	8.92	0	0	0.44	1.23	Y	N
48	hil-1	WBGene00001852	hil-1	C30G7.1	C30G7.1,C30G7.1	4.2361	1.27467	3.75966	4.80344	body wall musculature,Cell,excretory cell,excretory system,head neuron,marginal cell,vulval muscle	adult Ce,all stages Ce,elongating embryo Ce,enclosing embryo Ce,fully-elongated embryo Ce,gastrulating embryo Ce,L1 larva Ce,L2 larva Ce,L3 larva Ce,L4 larva Ce	hil-1 is an ortholog of human H1F0 (H1 histone family member 0); hil-1 is involved in body morphogenesis, cellular response to DNA damage stimulus, locomotion, growth, oviposition and pharynx development; hil-1 is predicted to have DNA binding activity, based on protein domain information; hil-1 is expressed in several tissues including the excretory system and the body wall musculature; hil-1 is…	179993	41	37	4	29.76	8.9	0	0	1.09	0.61	N	N
49	hen-1	WBGene00001841	hen-1	C36B7.7	C36B7.7,C36B7.7	-2.34712	-1.18168	-1.75094	3.78362	AIYL,AIYR,ASEL,ASER,neuron,pharyngeal muscle cell,vulva	N.A.	hen-1 encodes a secreted protein that contains a low-density lipoprotein (LDL) receptor motif A; HEN-1 activity is required for integration of sensory stimuli and behavioral plasticity; a hen-1::GFP reporter is expressed in pharyngeal muscles, the vulva, and weakly in a subset of neurons; antibodies to HEN-1 protein detect expression exclusively in the AIY and ASE neurons, where HEN-1 appears to …	191666	42	38	4	29.96	8.85	0	0	0.97	0.27	N	N
50	ttr-5	WBGene00008040	ttr-5	C40H1.5	C40H1.5,C40H1.5	4.1808	4.49749	6.75109	3.89388	N.A.	N.A.	C40H1.5 encodes a protein containing a predicted signal sequence followed by a transthyretin-like domain; the product of C40H1.5 belongs to a family of apparently nematode-specific proteins whose function is not yet known.	176312	45	40	5	30.91	8.81	0	0	3.17	1.04	N	N
51	nspa-5	WBGene00013887	nspa-5	ZC412.6	ZC412.6,ZC412.6	3.98868	2.60291	3.62372	-3.5229	N.A.	N.A.	Microarray and RNA sequencing studies indicate that nspa-5 is affected by Hydrogen sulfide, Ethanol, D-glucose, Acrylamide, Chlorpyrifos, Diazinon, Cry5B, Quercetin, Hydrolyzable Tannins, Humic substances, Paraquat, Benzene, Colistin, Tyrosol, and Allantoin; RNA sequencing and microarray studies indicate that nspa-5 is enriched in the germ line, amphid sheath cell, and male and in neurons.	179983	37	34	3	27.95	8.8	0	0	1.54	0.84	N	N
52	pnk-1	WBGene00004068	pnk-1	C10G11.5	C10G11.5a,C10G11.5b,C10G11.5c,C10G11.5a,C10G11.5b,C10G11.5c.1,C10G11.5c.2	4.82031	5.45493	4.39738	4.11521	N.A.	N.A.	pnk-1 is an ortholog of human PANK4 (pantothenate kinase 4), PANK1 (pantothenate kinase 1), PANK2 (pantothenate kinase 2) and PANK3 (pantothenate kinase 3); pnk-1 is involved in apoptotic process, determination of adult lifespan, embryo development, lipid storage, nematode larval development and reproduction; pnk-1 is predicted to have ATP binding activity and pantothenate kinase activity, based …	172327	45	40	5	30.87	8.8	0	0	1.59	1.46	Y	N
53	F20A1.10	WBGene00017621	F20A1.10	F20A1.10	F20A1.10,F20A1.10	7.39897	6.75925	6.33137	4.46732	N.A.	N.A.	F20A1.10 is involved in embryo development and gamete generation.	184707	46	41	5	31.08	8.76	0	0	1.11	0.13	N	N
54	T12D8.5	WBGene00011733	T12D8.5	T12D8.5	T12D8.5a,T12D8.5:wp99,T12D8.5b,T12D8.5a	0.947518	4.79132	1.63116	3.23353	N.A.	N.A.	Microarray and RNA sequencing studies indicate that T12D8.5 is affected by Hydrogen sulfide, Rotenone, Tunicamycin, Sodium arsenite, D-glucose, Cry5B, Chlorpyrifos, Diazinon, Humic substances, Colistin, Dafa#1, and Sirolimus; microarray, tiling array, and RNA sequencing studies indicate that T12D8.5 is enriched in the intestine and germ line and in the PVD, OLL, and dopaminergic neurons.	176797	46	41	5	31	8.74	0	0	0.15	1.81	Y	Y
55	pck-2	WBGene00011232	pck-2	R11A5.4	R11A5.4a,R11A5.4b,R11A5.4c,R11A5.4d,R11A5.4b.1,R11A5.4b.2,R11A5.4b.3,R11A5.4a.1,R11A5.4a.2,R11A5.4d.1,R11A5.4d.2,R11A5.4d.3,R11A5.4d.4,R11A5.4d.5,R11A5.4c.1,R11A5.4c.2,R11A5.4c.3	9.14105	7.99242	8.54161	6.09202	Cell,intestine,muscle cell,reproductive system,spermatheca,vulval muscle	adult Ce,dauer larva Ce,embryo Ce,larva Ce	pck-2 is one of three C. elegans genes that encode proteins with similarity to phosphoenolpyruvate carboxykinase (PEPCK); by similarity, the products of pck-2 are predicted to function in gluconeogenesis.	172556	45	42	3	30.57	8.71	0	0	0.79	0.15	N	N
57	tps-2	WBGene00006603	tps-2	F19H8.1	F19H8.1a,F19H8.1b,F19H8.1:wp91,F19H8.1:wp132,F19H8.1a,F19H8.1b	5.39148	4.13359	4.14752	2.58567	body wall musculature,muscle cell,reproductive system,vulval muscle	adult Ce,larva Ce	tps-2 encodes one of two trehalose-6-phosphate synthase proteins in C. elegans, and RNAi of both enzymes leads to a more than 90% reduction decrease in trehalose levels, but does not appear to affect viability or development; the tps-2 mRNA is expressed throughout development.	3565050	46	44	2	30.63	8.63	0	0	0.15	0	N	N
58	btb-17	WBGene00018200	btb-17	F39E9.11	F39E9.11,F39E9.11	-0.747616	1.71871	-1.55007	-2.4345	N.A.	N.A.	RNA sequencing and microarray studies indicate that btb-17 is affected by Rotenone, Tunicamycin, Mianserin, Cry5B, Humic substances, single-walled carbon nanotubes, and Dafa#1; tiling array and RNA sequencing studies indicate that btb-17 is enriched in the intestine and in the ASER neurons.	173673	22	22	0	21.02	8.62	0	0	1.28	2.54	Y	Y
59	nnt-1	WBGene00003778	nnt-1	C15H9.1	C15H9.1,C15H9.1	1.65192	1.21868	0.501515	3.57678	coelomocyte,dorsal nerve cord,head ganglion,head neuron,hypodermis,intestine,nerve ring,nervous system,neuron,pharyngeal-intestinal valve,tail ganglion,tail neuron,ventral cord neuron,ventral nerve cord	adult Ce,larva Ce	nnt-1 encodes a proton-pumping nicotinamide nucleotide transhydrogenase predicted to be mitochondrial.	180884	41	36	5	28.78	8.6	0	0	2.94	0.78	Y	N
60	F32A5.4	WBGene00017970	F32A5.4	F32A5.4	F32A5.4a,F32A5.4b,F32A5.4a.1,F32A5.4a.2,F32A5.4b	6.45016	6.39334	5.82878	5.50453	N.A.	N.A.	RNA sequencing and microarray studies indicate that F32A5.4 is affected by Methylmercury hydroxide, Methylmercuric chloride, Rotenone, D-glucose, Juglone, Estrogen, Acrylamide, Atrazine, Quercetin, Hydrolyzable Tannins, Humic substances, single-walled carbon nanotubes, Sirolimus, and Allantoin; RNA sequencing studies indicate that F32A5.4 is enriched in the germ line and Psub1 and in the RID neur…	174188	44	37	7	29.74	8.57	0	0	1.12	0	Y	N
61	C53B7.3	WBGene00016894	C53B7.3	C53B7.3	C53B7.3a,C53B7.3b,C53B7.3c,C53B7.3d,C53B7.3:wp184,C53B7.3c,C53B7.3a,C53B7.3b,C53B7.3d.1,C53B7.3d.2	5.80244	3.81613	7.69805	3.58714	N.A.	N.A.	Microarray and RNA sequencing studies indicate that C53B7.3 is affected by Hydrogen sulfide, Rotenone, Cry5B, Resveratrol, Deoxyglucose, Acrylamide, Humic substances, single-walled carbon nanotubes, Dafa#1, Sirolimus, and Allantoin; microarray and RNA sequencing studies indicate that C53B7.3 is enriched in the germ line and intestine and in the PVD and OLL neurons.	180957	45	39	6	29.93	8.53	0	0	2.79	2.42	N	N
62	far-7	WBGene00001391	far-7	K01A2.2	K01A2.2a,K01A2.2b,K01A2.2d,K01A2.2b:wp248,K01A2.2c,K01A2.2a,K01A2.2b,K01A2.2d	5.65191	2.20276	2.49445	2.08782	excretory canal,excretory cell,hypodermis,male	adult hermaphrodite Ce,embryo Ce,L1 larva Ce,L2 larva Ce,L3 larva Ce,L4 larva Ce	far-7 exhibits oleic acid binding activity; far-7 is expressed in the hypodermis, excretory cell, and in the male; far-7 is localized to the cytoplasm.	173421	39	35	4	27.81	8.52	0	0	0.67	1	Y	N
63	ttr-23	WBGene00011894	ttr-23	T21C9.8	T21C9.8,T21C9.8.1,T21C9.8.2	0.737144	3.12751	-0.128317	-2.76646	N.A.	N.A.	Microarray and RNA sequencing studies indicate that ttr-23 is affected by Heme, Hydrogen sulfide, Tunicamycin, Bisphenol S, Resveratrol, Chlorpyrifos, Diazinon, Cry5B, Humic substances, adsorbable organic bromine compounds, Multi-walled carbon nanotubes, and Allantoin; microarray, tiling array, and RNA sequencing studies indicate that ttr-23 is enriched in the pharyngeal muscle cell and intestine…	188688	44	37	7	29.19	8.41	0	0	0.64	1.66	Y	Y
65	try-9	WBGene00023425	try-9	B0286.6	B0286.6,B0286.6	-0.654262	0.0647334	-0.873607	-2.70163	N.A.	N.A.	try-9 is an ortholog of human TMPRSS15 (transmembrane protease, serine 15); try-9 is predicted to have serine-type endopeptidase activity, based on protein domain information.	3565941	21	21	0	19.92	8.36	5.55e-17	1.65e-14	0.29	0	Y	N
66	R11G10.3	WBGene00044045	R11G10.3	R11G10.3	R11G10.3,R11G10.3:wp188,R11G10.3	-1.00026	-0.223252	0.594598	2.68044	N.A.	N.A.	Microarray studies indicate that R11G10.3 is affected by nhr-114, sir-2.1, daf-2, and daf-16; tiling array and RNA sequencing studies indicate that R11G10.3 is enriched in the muscle cell and in neurons including the PVD and OLL neurons.	3565274	29	28	1	23.35	8.31	5.55e-17	1.62e-14	0.65	0.36	N	N
67	gst-4	WBGene00001752	gst-4	K08F4.7	K08F4.7,K08F4.7	6.59491	5.44384	6.58519	2.01241	body wall musculature,Cell,head neuron,hypodermis,intestine,muscle cell,nervous system,pharynx,reproductive system,vulval muscle	adult Ce,L1 larva Ce,L2 larva Ce,L3 larva Ce,L4 larva Ce,larva Ce	gst-4 encodes a putative glutathione-requiring prostaglandin D synthase; gst-4 is required for sperm to normally migrate towards a PUFA-based signal exuded by oocytes; gst-4(RNAi) hermaphrodites are infertile, both through aberrant loss of their own sperm and through failure of males to effectively inseminate them; in mammalian eicosanoid signalling, prostaglandin D synthase is required for the c…	177886	37	35	2	26.36	8.29	5.55e-17	1.6e-14	0.15	1.23	N	Y
68	asns-2	WBGene00019730	asns-2	M02D8.4	M02D8.4a,M02D8.4b,M02D8.4c,M02D8.4b,M02D8.4c,M02D8.4a	5.13395	4.14784	4.51399	1.75839	intestine	adult Ce,larva Ce	asns-2 is an ortholog of human ASNS (asparagine synthetase (glutamine-hydrolyzing)); asns-2 is predicted to have asparagine synthase (glutamine-hydrolyzing) activity, based on protein domain information; asns-2 is expressed in the intestine.	181121	43	36	7	28.37	8.27	5.55e-17	1.57e-14	0.15	0.23	N	N
69	ttr-25	WBGene00013078	ttr-25	Y51A2D.10	Y51A2D.10a,Y51A2D.10b,Y51A2D.10a,Y51A2D.10b	3.08608	6.08458	7.69912	1.42228	N.A.	N.A.	RNA sequencing and microarray studies indicate that ttr-25 is affected by Rotenone, Deoxyglucose, Chlorpyrifos, Humic substances, Paraquat, and Sirolimus; tiling array and microarray studies indicate that ttr-25 is enriched in the body wall muscle cell, intestine, and muscle cell and in the dopaminergic neurons.	180210	46	41	5	29.18	8.21	1.11e-16	3.1e-14	2.3	1.13	N	N
70	lea-1	WBGene00002263	lea-1	K08H10.1	K08H10.1a,K08H10.1b,K08H10.1c,K08H10.1d,K08H10.1e,K08H10.1f,K08H10.1g,K08H10.1h,K08H10.1i,K08H10.1j,K08H10.1k,K08H10.1l,K08H10.1m,K08H10.1n,K08H10.1o,K08H10.1p,K08H10.1g,K08H10.1k,K08H10.1p,K08H10.1i,K08H10.1l,K08H10.1j,K08H10.1h,K08H10.1n,K08H10.1m,K08H10.1o,K08H10.1f.1,K08H10.1f.2,K08H10.1b.1,K08H10.1b.2,K08H10.1a.1,K08H10.1a.2,K08H10.1e,K08H10.1d,K08H10.1c.1,K08H10.1c.2	6.26999	6.67374	7.75417	6.03995	body wall musculature,Cell,gonad,head neuron,tail neuron	adult Ce,embryo Ce,L1 larva Ce,L2 larva Ce,L3 larva Ce,L4 larva Ce	The lea-1 gene encodes a protein that is predicted to be hydrophilic and heat-resistant, and that might participate in anhydrobiosis.	3564838	43	36	7	28.18	8.21	1.11e-16	3.06e-14	2.58	0.84	Y	N
71	cpi-1	WBGene00000535	cpi-1	K08B4.6	K08B4.6,K08B4.6	6.75693	6.50565	6.75	3.3036	N.A.	N.A.	cpi-1 encodes a homolog of cysteine protease inhibitors (cystatins); cpi-1 is at least superficially dispensable for viability and gross morphology.	177372	44	37	7	28.43	8.18	1.11e-16	3.02e-14	2.23	1.13	Y	Y
72	ugt-11	WBGene00020593	ugt-11	T19H12.10	T19H12.10,T19H12.10	0.932256	0.31186	-0.703895	0.892909	N.A.	N.A.	ugt-11 is an ortholog of human UGT3A2 (UDP glycosyltransferase family 3 member A2) and UGT3A1 (UDP glycosyltransferase family 3 member A1); ugt-11 is predicted to have transferase activity, transferring hexosyl groups, based on protein domain information.	178882	45	40	5	28.71	8.17	1.67e-16	4.46e-14	0	0	Y	N
73	T28C6.8	WBGene00012122	T28C6.8	T28C6.8	T28C6.8,T28C6.8	4.92239	2.68462	2.47437	0.982659	N.A.	N.A.	Microarray and RNA sequencing studies indicate that T28C6.8 is affected by daf-16, spe-44, emr-1, lem-2, wdr-5.1, wrn-1, htz-1, daf-2, jmjd-3.1, dpy-21, sir-2.1, dpy-9, dpy-10, osm-8, osm-11, crh-1, alg-1, tbx-2, and nuo-6; microarray studies indicate that T28C6.8 is affected by Resveratrol, Fluoranthene, Humic substances, and Colistin; tiling array, RNA sequencing, and microarray studies indicat…	177696	46	42	4	28.98	8.16	1.67e-16	4.4e-14	1.49	0.23	Y	Y
74	C18A11.1	WBGene00015947	C18A11.1	C18A11.1	C18A11.1,C18A11.1	1.40374	4.19035	1.96889	1.64475	N.A.	N.A.	RNA sequencing and microarray studies indicate that C18A11.1 is affected by 1-methylnicotinamide, Methylmercuric chloride, Bisphenol A, Bisphenol S, Fluoranthene, Chlorpyrifos, Diazinon, Cry5B, Quercetin, Humic substances, adsorbable organic bromine compounds, and Sirolimus; microarray, tiling array, and RNA sequencing studies indicate that C18A11.1 is enriched in the pharynx, coelomocytes, intes…	182759	41	39	2	27.29	8.15	1.67e-16	4.34e-14	1.19	1.55	Y	Y
76	dhs-26	WBGene00000989	dhs-26	ZK816.5	ZK816.5,ZK816.5:wp147,ZK816.5	-1.34903	-2.3979	-1.9102	-0.0385638	N.A.	N.A.	dhs-26 encodes a short-chain dehydrogenase predicted to be mitochondrial.	180624	46	39	7	28.87	8.12	2.22e-16	5.63e-14	0	0.23	N	Y
77	Y69H2.3	WBGene00013481	Y69H2.3	Y69H2.3	Y69H2.3a,Y69H2.3b,Y69H2.3c,Y69H2.3d,Y69H2.3e,Y69H2.3g,Y69H2.3h,Y69H2.3i,Y69H2.3a:wp90,Y69H2.3a:wp229,Y69H2.3b:wp90,Y69H2.3f,Y69H2.3i,Y69H2.3g,Y69H2.3d,Y69H2.3e,Y69H2.3a,Y69H2.3h,Y69H2.3b,Y69H2.3c	6.5381	5.60503	7.61218	5.0847	N.A.	N.A.	Y69H2.3 is involved in embryo development, hermaphrodite genitalia development and locomotion.	180221	44	38	6	28.06	8.08	3.33e-16	8.34e-14	1.56	0.13	N	N
78	ZC395.5	WBGene00022597	ZC395.5	ZC395.5	ZC395.5,ZC395.5	3.46754	0.865536	0.91817	1.20732	N.A.	N.A.	Microarray and RNA sequencing studies indicate that ZC395.5 is affected by Methylmercuric chloride, Rotenone, Mianserin, D-glucose, Progesterone, Ethanol, Chlorpyrifos, Diazinon, Quercetin, Humic substances, and Sirolimus; tiling array, RNA sequencing, and microarray studies indicate that ZC395.5 is enriched in the germ line and intestine and in the GABAergic, ASER, and PLM neurons.	191152	44	39	5	27.92	8.03	4.44e-16	1.1e-13	1.83	0.45	Y	N
79	Y9C9A.16	WBGene00021183	Y9C9A.16	Y9C9A.16	Y9C9A.16a,Y9C9A.16b,Y9C9A.16:wp154,Y9C9A.16b,Y9C9A.16a	2.11666	-2.30094	-2.56007	2.13916	N.A.	N.A.	Y9C9A.16 is an ortholog of human RP11-96O20.4 and SQRDL (sulfide quinone reductase-like (yeast)); Y9C9A.16 is predicted to have oxidoreductase activity, based on protein domain information.	189421	30	27	3	22.91	8.01	5.55e-16	1.36e-13	1.11	1.28	N	N
80	W08A12.2	WBGene00021079	W08A12.2	W08A12.2	W08A12.2a,W08A12.2b,W08A12.2a,W08A12.2b	4.63635	5.12775	6.81369	2.6531	N.A.	N.A.	Microarray and RNA sequencing studies indicate that W08A12.2 is affected by lin-15B, daf-16, tatn-1, emr-1, lem-2, csr-1, bar-1, gld-2, clk-1, daf-2, glp-1, let-418, chd-3, dpy-21, sir-2.1, dcr-1, hcf-1, alg-1, ain-2, and tbx-2; RNA sequencing and microarray studies indicate that W08A12.2 is affected by Multi-walled carbon nanotubes, D-glucose, Cry5B, Humic substances, and Sirolimus; tiling array…	178786	44	41	3	27.78	7.99	6.66e-16	1.61e-13	0.15	0.45	Y	N
81	K07B1.4	WBGene00019464	K07B1.4	K07B1.4	K07B1.4a,K07B1.4b,K07B1.4a,K07B1.4b	5.59936	3.15786	3.12986	3.08238	body wall musculature,intestine,rectal gland cell	adult Ce,larva Ce	K07B1.4 is an ortholog of human DGAT2 (diacylglycerol O-acyltransferase 2), MOGAT2 (monoacylglycerol O-acyltransferase 2) and MOGAT1 (monoacylglycerol O-acyltransferase 1); K07B1.4 is involved in embryo development; K07B1.4 is predicted to have transferase activity, transferring acyl groups other than amino-acyl groups, based on protein domain information; K07B1.4 is expressed in the intestine, r…	179314	43	39	4	27.4	7.98	7.22e-16	1.72e-13	1.78	0.66	Y	Y
82	F47B7.1	WBGene00018532	F47B7.1	F47B7.1	F47B7.1,F47B7.1	8.4207	6.24843	7.74199	5.73806	N.A.	N.A.	RNA sequencing and microarray studies indicate that F47B7.1 is affected by Rotenone, D-glucose, Cholestanol, Resveratrol, Chlorpyrifos, Diazinon, Humic substances, Paraquat, and Sirolimus; RNA sequencing and microarray studies indicate that F47B7.1 is enriched in the muscle cell and intestine and in the ASER and PLM neurons.	180666	40	36	4	26.22	7.92	1.22e-15	2.87e-13	0.19	0.23	Y	N
83	clx-1	WBGene00000551	clx-1	C50F7.2	C50F7.2,C50F7.2:wp154,C50F7.2	-5.85026	-3.37564	-3.70317	-1.17989	N.A.	N.A.	clx-1 encodes a protein that contains 23 copies of a 15 amino acid repeat, possibly derived from a collagen triplet; there is no transcript evidence for this locus.	177556	46	41	5	28.15	7.92	1.22e-15	2.84e-13	1.15	2.04	Y	Y
84	T20G5.8	WBGene00011870	T20G5.8	T20G5.8	T20G5.8,T20G5.8	4.16828	8.08665	4.54373	4.27481	N.A.	N.A.	T20G5.8 is involved in determination of adult lifespan.	188660	45	40	5	27.8	7.91	1.33e-15	3.06e-13	0.26	0	N	N
85	ugt-13	WBGene00019232	ugt-13	H23N18.1	H23N18.1,H23N18.1:wp107,H23N18.1	5.17342	2.52597	1.41501	0.0112029	N.A.	N.A.	ugt-13 is an ortholog of human UGT3A2 (UDP glycosyltransferase family 3 member A2) and UGT3A1 (UDP glycosyltransferase family 3 member A1); ugt-13 is predicted to have transferase activity, transferring hexosyl groups, based on protein domain information.	186766	42	38	4	26.83	7.91	1.33e-15	3.02e-13	0.41	1.23	N	N
87	F21C10.10	WBGene00017659	F21C10.10	F21C10.10	F21C10.10,F21C10.10.1,F21C10.10.2	6.24691	3.47975	4.96254	3.53983	N.A.	N.A.	F21C10.10 is localized to the mitochondrion.	179290	42	40	2	26.75	7.88	1.67e-15	3.69e-13	0.26	1.23	Y	Y
88	F43H9.4	WBGene00018400	F43H9.4	F43H9.4	F43H9.4,F43H9.4	5.95031	2.13817	2.42964	-0.0232265	N.A.	N.A.	F43H9.4 is an ortholog of human GLYATL1 (glycine-N-acyltransferase like 1), GLYATL2 (glycine-N-acyltransferase like 2), GLYAT (glycine-N-acyltransferase) and GLYATL3 (glycine-N-acyltransferase like 3); F43H9.4 is predicted to have glycine N-acyltransferase activity, based on protein domain information.	179182	41	35	6	26.34	7.86	2e-15	4.38e-13	0.42	0.74	Y	N
89	ZK1073.1	WBGene00014213	ZK1073.1	ZK1073.1	ZK1073.1,ZK1073.1.1,ZK1073.1.2	5.13772	4.90339	6.40319	7.77817	N.A.	N.A.	ZK1073.1 is an ortholog of human NDRG1 (N-myc downstream regulated 1), NDRG4 (NDRG family member 4), NDRG2 (NDRG family member 2) and NDRG3 (NDRG family member 3); RNA sequencing, proteomic, and microarray studies indicate that ZK1073.1 is affected by Rotenone, D-glucose, Nicotine, Hydrolyzable Tannins, single-walled carbon nanotubes, Selenium, and Sirolimus; microarray, tiling array, and RNA seq…	181689	40	36	4	25.98	7.84	2.16e-15	4.69e-13	0.51	0.26	Y	N
90	nas-5	WBGene00003524	nas-5	T23H4.3	T23H4.3,T23H4.3	-2.84946	0.810885	-1.36308	-0.0663806	marginal cell,Pharyngeal gland cell,rectal gland cell,uterine seam cell	N.A.	nas-5 encodes an astacin-like metalloprotease; loss of nas-5 activity in an RNAi hypersensitive strain results in axon guidance defects, including a failure of DD/VD motoneuron commissures to reach the dorsal cord, defasciculation of the dorsal nerve cord, and midline crossing defects in the ventral nerve cord.	188819	35	32	3	24.23	7.83	2.39e-15	5.12e-13	0.45	0	N	N
91	C27H5.2	WBGene00016172	C27H5.2	C27H5.2	C27H5.2a,C27H5.2b,C27H5.2c,C27H5.2d,C27H5.2a,C27H5.2d,C27H5.2b,C27H5.2c	1.78529	3.88794	3.35338	2.6717	N.A.	N.A.	Microarray, tiling array, and RNA sequencing studies indicate that C27H5.2 is affected by cyc-1, lin-35, daf-12, hcf-1, wdr-23, eat-2, emr-1, lem-2, clk-1, daf-2, glp-1, daf-16, cco-1, sir-2.1, ain-1, mir-243, aak-2, and mir-35; microarray studies indicate that C27H5.2 is affected by Aldicarb, Tryptophan, Diazinon, single-walled carbon nanotubes, and Colistin; microarray and RNA sequencing studie…	174176	45	39	6	27.54	7.83	2.44e-15	5.18e-13	0.15	0	Y	N
92	nspa-8	WBGene00012294	nspa-8	W06A7.5	W06A7.5,W06A7.5	2.44446	5.17828	4.21972	-1.75991	N.A.	N.A.	Microarray and RNA sequencing studies indicate that nspa-8 is affected by Hydrogen sulfide, Ethanol, Multi-walled carbon nanotubes, Resveratrol, Acrylamide, Chlorpyrifos, Diazinon, and Colistin; RNA sequencing studies indicate that nspa-8 is enriched in the germ line, amphid sheath cell, and male.	179980	40	34	6	25.92	7.83	2.5e-15	5.24e-13	0.12	1.67	N	N
93	gst-15	WBGene00001763	gst-15	F37B1.4	F37B1.4,F37B1.4	0.776739	1.84556	3.54074	0.787105	N.A.	N.A.	gst-15 is an ortholog of members of the human GST (Soluble glutathione S-transferases) family including HPGDS; RNA sequencing and microarray studies indicate that gst-15 is affected by wdr-23, daf-2, rsks-1, clk-1, daf-16, hsf-1, dpy-21, daf-12, sir-2.1, slr-2, daf-19, hcf-1, hlh-29, isp-1, and nuo-6; microarray studies indicate that gst-15 is affected by Mercuric Chloride, Progesterone, Acrylami…	185410	30	29	1	22.37	7.82	2.66e-15	5.53e-13	0	0.36	N	N
94	comt-4	WBGene00021491	comt-4	Y40B10A.6	Y40B10A.6,Y40B10A.6	-0.439381	-3.41487	-4.23956	-3.73557	N.A.	N.A.	comt-4 is an ortholog of human COMTD1 (catechol-O-methyltransferase domain containing 1); comt-4 is predicted to have O-methyltransferase activity, based on protein domain information.	189789	39	33	6	25.55	7.82	2.72e-15	5.58e-13	0.57	0.45	N	Y
95	nhr-62	WBGene00003652	nhr-62	Y67A6A.2	Y67A6A.2a,Y67A6A.2b,Y67A6A.2:wp47,Y67A6A.2a,Y67A6A.2b.1,Y67A6A.2b.2	3.67985	3.05386	3.38791	3.48164	excretory cell,head,HSNL,HSNR,hypodermis,intestine,midbody,motor neuron,pharyngeal neuron,pharynx,sensory neuron,spermatheca,ventral nerve cord	adult Ce,embryo Ce,L1 larva Ce,L2 larva Ce,L3 larva Ce,L4 larva Ce	nhr-62 is an ortholog of members of the human NR (Nuclear hormone receptors) family including PPARD; nhr-62 is predicted to have sequence-specific DNA binding activity, steroid hormone receptor activity, transcription factor activity, sequence-specific DNA binding, and zinc ion binding activity, based on protein domain information; nhr-62 is expressed in the pharynx, spermatheca, all motor neuron…	172836	40	36	4	25.87	7.81	2.78e-15	5.63e-13	0.33	0.13	Y	N
96	dct-6	WBGene00017773	dct-6	F25B5.1	F25B5.1a,F25B5.1b,F25B5.1:wp146,F25B5.1a:wp152,F25B5.1b,F25B5.1a	4.70719	4.68138	5.23828	2.8355	anal depressor muscle,body wall musculature,hypodermis,intestine,pharynx,rectal gland cell,reproductive system,seam cell,uterine muscle,vulva	adult Ce,larva Ce	dct-6 is expressed in the pharynx, anal depressor muscle, hypodermis, reproductive system, intestine, rectal gland cell, and the body wall musculature.	175846	46	40	6	27.78	7.81	2.83e-15	5.69e-13	1	1.36	Y	Y
97	glb-1	WBGene00014030	glb-1	ZK637.13	ZK637.13,ZK637.13	2.3694	2.43409	4.14428	3.9335	anal depressor muscle,anal sphincter muscle,germ line,head muscle,head neuron,HSNL,HSNR,hyp1,hyp2,hyp3,hyp4,hyp5,hyp6,hyp8,hyp9,hyp10,hyp11,hyp12,hypodermis,lateral nerve cord,tail neuron,VC neuron,ventral cord neuron,ventral nerve cord	adult Ce,dauer larva Ce,embryo Ce,fully-elongated embryo Ce,L1 larva Ce,L2 larva Ce,L3 larva Ce,L4 larva Ce,larva Ce	glb-1 encodes a globin; glb-1 transcription is uninduced by anoxia, but repressed by DAF-2 signalling in a DAF-16 dependent manner; glb-1 is expressed in distal germline, late embryonic cells that are probably hypodermal precursors, and young adults; glb-1 transcription is lower in L3 larvae than in adults, while in adults it is higher than that of most other globins; glb-1 has no obvious functio…	176261	41	38	3	26.2	7.81	2.83e-15	5.63e-13	1.15	0.57	Y	N
98	F41E7.1	WBGene00009617	F41E7.1	F41E7.1	F41E7.1,F41E7.1	2.62328	0.21955	-1.3543	-0.0385093	excretory canal,excretory cell,G2,pharynx	adult Ce,embryo Ce,L1 larva Ce,L2 larva Ce,L3 larva Ce,L4 larva Ce	F41E7.1 is an ortholog of human SLC9B2 (solute carrier family 9 member B2) and SLC9B1 (solute carrier family 9 member B1); F41E7.1 is involved in locomotion and the molting cycle; F41E7.1 is predicted to have solute:proton antiporter activity, based on protein domain information; F41E7.1 is expressed in the pharynx and the excretory cell.	181236	45	38	7	27.47	7.81	2.83e-15	5.57e-13	1.21	0	N	N
99	ZK455.5	WBGene00013975	ZK455.5	ZK455.5	ZK455.5,ZK455.5:wp131,ZK455.5:wp188,ZK455.5	1.98503	-2.69922	-1.8032	-2.79568	N.A.	N.A.	Microarray, tiling array, and RNA sequencing studies indicate that ZK455.5 is affected by lin-15B, rsr-2, daf-2, skn-1, npr-1, dop-1, dpy-21, daf-12, daf-16, and dcr-1; microarray studies indicate that ZK455.5 is affected by Resveratrol, Copper sulfate, Colistin, adsorbable organic bromine compounds, Sirolimus, and Ag nanoparticles.	191321	25	24	1	20.34	7.8	3.05e-15	5.95e-13	0.49	1	N	N
100	C50F7.5	WBGene00016845	C50F7.5	C50F7.5	C50F7.5,C50F7.5:wp234,C50F7.5	4.11598	2.75418	-1.0072	2.57209	N.A.	N.A.	RNA sequencing and microarray studies indicate that C50F7.5 is affected by 1-methylnicotinamide, Rotenone, Tunicamycin, Manganese chloride, Sodium arsenite, D-glucose, Bisphenol A, Bisphenol S, D-glucopyranose, Atrazine, Chlorpyrifos, Diazinon, Cry5B, Ivermectin, Humic substances, Copper sulfate, Colistin, Sirolimus, and Allantoin; microarray and RNA sequencing studies indicate that C50F7.5 is en…	177554	44	41	3	27.06	7.78	3.55e-15	6.85e-13	1.3	2.27	N	Y
101	T19B10.2	WBGene00011831	T19B10.2	T19B10.2	T19B10.2,T19B10.2.1,T19B10.2.2	6.47609	6.79252	2.07054	2.81645	hypodermis	N.A.	T19B10.2 is involved in determination of adult lifespan, locomotion, the molting cycle, nematode larval development and reproduction; T19B10.2 is expressed in the hypodermis.	179551	43	36	7	26.6	7.74	5e-15	9.54e-13	0.83	0.6	Y	N
102	ges-1	WBGene00001578	ges-1	R12A1.4	R12A1.4,R12A1.4	0.659278	4.38611	0.798524	0.983507	intestine,pharynx	4-cell embryo Ce,adult Ce,elongating embryo Ce,embryo Ce,enclosing embryo Ce,fully-elongated embryo Ce,gastrulating embryo Ce,L1 larva Ce,L2 larva Ce,L3 larva Ce,L4 larva Ce	ges-1 encodes a gut-specific type B carboxylesterase; by homology, GES-1 hydrolyzes carboxylic ester substrates to yield an alcohol and a carboxylic anion, however, loss of GES-1 activity via mutation or RNAi does not result in any obvious abnormalities; GES-1 is expressed solely in the intestinal, or E, lineage from the 4 E-cell stage of gut development through adulthood; GES-1 contains a C-term…	178633	45	37	8	27.18	7.73	5.55e-15	1.05e-12	0.26	0.45	Y	N
103	ctl-1	WBGene00000830	ctl-1	Y54G11A.6	Y54G11A.6,Y54G11A.6:wp78,Y54G11A.6.1,Y54G11A.6.2	0.66104	1.00237	-5.40933	-3.6903	N.A.	all stages Ce	ctl-1 encodes one of three C. elegans catalases; CTL-1 exhibits catalase activity in vitro, and thus likely functions in vivo as an antioxidant enzyme that protects cells from reactive oxygen species; ctl-1 activity contributes to the extended lifespan seen in daf-2 mutant animals; in addition, ctl-1 expression is negatively regulated by DAF-2-mediated insulin signaling; as CTL-1 does not possess…	259738	22	21	1	18.87	7.72	5.72e-15	1.07e-12	0.21	2.59	N	N
104	C55A6.6	WBGene00008335	C55A6.6	C55A6.6	C55A6.6,C55A6.6	1.86695	1.48165	2.03775	1.73397	N.A.	N.A.	C55A6.6 is involved in growth.	183835	45	38	7	27.16	7.72	5.72e-15	1.06e-12	0.76	0	Y	N
105	E04F6.9	WBGene00017128	E04F6.9	E04F6.9	E04F6.9,E04F6.9	6.15447	6.27031	8.05849	4.97263	N.A.	N.A.	RNA sequencing, proteomic, and microarray studies indicate that E04F6.9 is affected by Rotenone, Nicotine, Deoxyglucose, Quercetin, Humic substances, and Sirolimus; tiling array, RNA sequencing, and microarray studies indicate that E04F6.9 is enriched in the cephalic sheath cell, hypodermis, germ line, and muscle cell and in the dopaminergic, PVD, OLL, AFD, and PLM neurons.	174185	42	39	3	26.2	7.71	6.05e-15	1.11e-12	0.84	1.5	Y	N
106	ZC410.5	WBGene00013882	msa-1	ZC410.5	ZC410.5a,ZC410.5c,ZC410.5:wp109,ZC410.5b:wp242,ZC410.5b:wp246,ZC410.5a,ZC410.5c.1,ZC410.5c.2,ZC410.5c.3,ZC410.5c.4	7.38906	5.46686	7.28373	10.0183	N.A.	N.A.	RNA sequencing and microarray studies indicate that msa-1 is affected by Ethanol, Rotenone, Quercetin, Humic substances, and Colistin; microarray, tiling array, and RNA sequencing studies indicate that msa-1 is enriched in the cephalic sheath cell, hypodermis, germ line, Psub1, and intestine and in neurons including the PVD, OLL, dopaminergic, NSM, AFD, ASER, and RID neurons.	177728	46	40	6	27.42	7.71	6.44e-15	1.17e-12	0.53	0	Y	N
107	D1086.1	WBGene00008388	D1086.1	D1086.1	D1086.1,D1086.1	-0.75145	-0.845199	3.45305	1.86022	N.A.	N.A.	Microarray, tiling array, and RNA sequencing studies indicate that D1086.1 is affected by cyc-1, sma-2, lin-35, daf-16, atfs-1, spg-7, rsr-2, daf-2, glp-1, daf-12, rde-4, spr-5, fbf-1, tax-6, hcf-1, sir-2.1, isp-1, nuo-6, oga-1, and eat-2; microarray and RNA sequencing studies indicate that D1086.1 is affected by Hydrogen sulfide, Tryptophan, Rotenone, Atrazine, Quercetin, and Humic substances; m…	179909	43	38	5	26.48	7.71	6.55e-15	1.18e-12	0.29	0.13	Y	N
108	nas-9	WBGene00003528	nas-9	C37H5.9	C37H5.9a,C37H5.9b,C37H5.9c,C37H5.9c.1,C37H5.9c.2,C37H5.9b,C37H5.9a	5.03695	0.76864	0.0785865	0.114407	hyp7 syncytium,hypodermis,spermatheca,uterus	adult Ce,larva Ce	nas-9 encodes an astacin-like metalloprotease; loss of nas-9 activity via RNAi results in low levels (6%) of embryonic lethality; a nas-9::GFP promoter fusion is expressed in embryos and in the hypodermis of larvae and adults.	178875	45	41	4	27.05	7.69	7.33e-15	1.31e-12	0.48	1.27	N	N
110	T11G6.3	WBGene00011718	T11G6.3	T11G6.3	T11G6.3,T11G6.3	4.28717	1.75799	1.03863	-0.349047	N.A.	N.A.	T11G6.3 is an ortholog of human SLC37A3 (solute carrier family 37 member 3); T11G6.3 is predicted to have transporter activity, based on protein domain information.	188430	27	25	2	20.79	7.67	8.94e-15	1.57e-12	1.29	0	Y	N
111	bath-26	WBGene00020329	bath-26	T07H3.6	T07H3.6,T07H3.6:wp86,T07H3.6	-2.622	-0.0444506	-5.64524	-2.40066	N.A.	N.A.	Microarray and RNA sequencing studies indicate that bath-26 is affected by Tryptophan, Methylmercury hydroxide, Bisphenol A, Cholestanol, Ethanol, Cry5B, adsorbable organic bromine compounds, and Ag nanoparticles; RNA sequencing studies indicate that bath-26 is enriched in the intestine.	173531	39	36	3	25.04	7.66	9.49e-15	1.65e-12	1.23	0.55	N	N
112	aakg-4	WBGene00020135	aakg-4	T01B6.3	T01B6.3a,T01B6.3b,T01B6.3a:wp98,T01B6.3b:wp98,T01B6.3b,T01B6.3a	1.73241	0.697483	4.20808	3.35348	amphid neuron,amphid sheath cell,amphid socket cell,anal depressor muscle,body wall musculature,dorsal nerve cord,intestine,nerve ring neuron,pharyngeal neuron,phasmid neuron,phasmid sheath cell,phasmid socket cell,preanal ganglion,rectal epithelium,uterine muscle,ventral cord neuron,vulval muscle	N.A.	aakg-4 encodes one of five C. elegans AMP kinase (AMPK) gamma regulatory subunits.	187928	30	27	3	21.82	7.62	1.23e-14	2.11e-12	1.65	0	N	N
113	B0361.9	WBGene00015163	B0361.9	B0361.9	B0361.9,B0361.9	6.92751	3.70122	3.09399	3.63618	N.A.	N.A.	Microarray, tiling array, and RNA sequencing studies indicate that B0361.9 is affected by lin-35, cyc-1, daf-12, csr-1, daf-2, ham-3, skn-1, sir-2.1, dcr-1, ain-1, fbf-1, tax-6, tdp-1, gei-8, isp-1, and nuo-6; RNA sequencing and microarray studies indicate that B0361.9 is affected by Rotenone, Cadmium, Cry5B, Diazinon, Humic substances, single-walled carbon nanotubes, and Allantoin; RNA sequencin…	176033	46	40	6	27.08	7.61	1.37e-14	2.34e-12	0.11	0	Y	N
114	Y105C5A.8	WBGene00013633	Y105C5A.8	Y105C5A.8	Y105C5A.8a,Y105C5A.8:wp114,Y105C5A.8:wp154,Y105C5A.8b:wp194,Y105C5A.8b,Y105C5A.8a.1,Y105C5A.8a.2	5.60433	1.26564	2.2322	2.61261	N.A.	N.A.	RNA sequencing and microarray studies indicate that Y105C5A.8 is affected by Rotenone, Manganese chloride, Quercetin, and Paraquat.	190873	26	24	2	20.23	7.6	1.45e-14	2.45e-12	0.21	0.13	N	N
115	icmt-1	WBGene00017673	icmt-1	F21F3.3	F21F3.3,F21F3.3	0.15858	1.80839	-0.458585	-0.176504	N.A.	N.A.	icmt-1 is an ortholog of human ICMT (isoprenylcysteine carboxyl methyltransferase); icmt-1 is involved in embryo development; icmt-1 is predicted to have protein C-terminal S-isoprenylcysteine carboxyl O-methyltransferase activity, based on protein domain information.	172106	46	35	11	27.03	7.59	1.55e-14	2.6e-12	1.19	0.61	Y	N
116	mce-1	WBGene00008415	mce-1	D2030.5	D2030.5,D2030.5	6.57876	5.01017	6.81039	5.34284	body wall musculature,hypodermis,intestine,pharynx	L1 larva Ce,L2 larva Ce,L3 larva Ce,L4 larva Ce	mce-1 is an ortholog of human MCEE (methylmalonyl-CoA epimerase); mce-1 is expressed in the pharynx, hypodermis, intestine, and the body wall musculature; mce-1 is localized to the mitochondrion.	172514	41	37	4	25.41	7.57	1.82e-14	3.03e-12	2.13	1.45	Y	Y
117	T27D12.1	WBGene00012085	T27D12.1	T27D12.1	T27D12.1a,T27D12.1b,T27D12.1b,T27D12.1a.1,T27D12.1a.2	6.92779	3.14543	2.28656	1.60629	N.A.	N.A.	T27D12.1 is an ortholog of members of the human SLC (Solute carriers) family including SLC17A1; RNA sequencing and microarray studies indicate that T27D12.1 is affected by D-glucose, Resveratrol, Humic substances, and Sirolimus; RNA sequencing and microarray studies indicate that T27D12.1 is enriched in the germ line and intestine.	174820	46	40	6	26.83	7.54	2.4e-14	3.95e-12	0	2.46	Y	N
118	F13D11.4	WBGene00017429	F13D11.4	F13D11.4	F13D11.4,F13D11.4:wp133,F13D11.4.1,F13D11.4.2	6.1877	3.53625	0.490838	1.72843	N.A.	N.A.	F13D11.4 is predicted to have 3-beta-hydroxy-delta5-steroid dehydrogenase activity, based on protein domain information.	184416	45	37	8	26.46	7.52	2.78e-14	4.55e-12	0.46	0.96	N	Y
119	K07E1.1	WBGene00019489	K07E1.1	K07E1.1	K07E1.1,K07E1.1:wp154,K07E1.1.1,K07E1.1.2	7.81574	3.39941	3.6476	3.07315	N.A.	N.A.	K07E1.1 is an ortholog of human ADI1 (acireductone dioxygenase 1); K07E1.1 is involved in reproduction; K07E1.1 is predicted to have acireductone dioxygenase [iron(II)-requiring] activity, based on protein domain information.	24104726	46	37	9	26.7	7.5	3.15e-14	5.1e-12	0	0.4	N	N
120	pck-1	WBGene00021043	pck-1	W05G11.6	W05G11.6a,W05G11.6b,W05G11.6c,W05G11.6d,W05G11.6d.1,W05G11.6d.2,W05G11.6c.1,W05G11.6c.2,W05G11.6a.1,W05G11.6a.2,W05G11.6b.1,W05G11.6b.2,W05G11.6b.3	7.94983	7.56738	9.05976	8.56657	N.A.	N.A.	pck-1 is one of three C. elegans genes that encode proteins with similarity to phosphoenolpyruvate carboxykinase (PEPCK); by similarity, the products of W05G11.6 are predicted to function in gluconeogenesis.	175171	44	39	5	26.08	7.5	3.29e-14	5.28e-12	0.99	0.28	N	N
121	F53F8.4	WBGene00010001	F53F8.4	F53F8.4	F53F8.4,F53F8.4	6.38988	2.22272	1.15144	3.42617	N.A.	N.A.	F53F8.4 is an ortholog of human FAM46B (family with sequence similarity 46 member B), FAM46C (family with sequence similarity 46 member C), FAM46D (family with sequence similarity 46 member D) and FAM46A (family with sequence similarity 46 member A); RNA sequencing and microarray studies indicate that F53F8.4 is affected by Rotenone, D-glucose, Chlorpyrifos, Diazinon, Hydrolyzable Tannins, Humic …	186181	44	38	6	26.07	7.49	3.39e-14	5.4e-12	0.15	0.25	Y	N
122	clec-76	WBGene00021587	clec-76	Y46C8AR.1	Y46C8AR.1,Y46C8AR.1:wp82,Y46C8AR.1.1,Y46C8AR.1.2	-2.90807	0.458214	-5.16347	-4.48725	N.A.	N.A.	Microarray studies indicate that clec-76 is affected by Heme, Tryptophan, Tunicamycin, Chlorpyrifos, Diazinon, Quercetin, single-walled carbon nanotubes, Dibromoacetic acid, Multi-walled carbon nanotubes, and Sirolimus.	189950	29	27	2	21.02	7.47	4e-14	6.32e-12	0.49	1.23	N	Y
123	hsp-12.6	WBGene00002013	hsp-12.6	F38E11.2	F38E11.2,F38E11.2	0.0719163	1.0213	5.41579	1.07446	hypodermis,intestine,muscle cell,sperm,spermatid,spermatocyte,vulval muscle	adult Ce,L1 larva Ce,L4 larva Ce	hsp-12.6 encodes a small heat-shock protein with very short N- and C-terminal domains flanking its central region of similarity to alpha-crystallins; HSP-12.6 is required in vivo for normal lifespan; HSP-12.6 is predominantly and ubiquitously expressed in L1 larvae without any obvious induction by stressors; but, in adult hermaphrodites, at least one HSP-12 is also expressed in spermatids (and pe…	177778	39	32	7	24.41	7.46	4.36e-14	6.83e-12	1.14	0.27	N	N
124	dhs-20	WBGene00000983	dhs-20	F35B12.2	F35B12.2,F35B12.2:wp87,F35B12.2:wp152,F35B12.2	0.340419	3.94246	0.505362	-1.13286	N.A.	N.A.	dhs-20 encodes a short-chain dehydrogenase predicted to be mitochondrial.	179590	44	36	8	25.84	7.43	5.63e-14	8.76e-12	0.23	1.23	N	Y
125	F55H12.4	WBGene00010135	F55H12.4	F55H12.4	F55H12.4,F55H12.4	8.83744	5.89757	5.87618	6.37559	anus,hypodermis,pharynx,vulva	N.A.	F55H12.4 is expressed in the pharynx, anus, hypodermis, and the vulva.	186344	46	36	10	26.43	7.42	5.67e-14	8.74e-12	0.26	0	Y	N
126	T23B3.2	WBGene00020710	T23B3.2	T23B3.2	T23B3.2,T23B3.2.1,T23B3.2.2	4.40759	4.92294	5.27767	4.74838	N.A.	N.A.	Microarray and RNA sequencing studies indicate that T23B3.2 is affected by Aldicarb, 1-methylnicotinamide, Methylmercuric chloride, Rotenone, Resveratrol, Cry5B, Hydrolyzable Tannins, Humic substances, and Sirolimus; tiling array, RNA sequencing, and microarray studies indicate that T23B3.2 is enriched in the excretory cell, hypodermis, germ line, and muscle cell and in neurons including the dopa…	188772	46	43	3	26.41	7.42	5.93e-14	9.08e-12	0.33	1.29	N	N
127	gst-39	WBGene00001787	gst-39	Y53F4B.33	Y53F4B.33,Y53F4B.33	2.28214	4.51845	3.48342	3.75568	N.A.	N.A.	gst-39 is an ortholog of members of the human GST (Soluble glutathione S-transferases) family including HPGDS; proteomic, microarray, and RNA sequencing studies indicate that gst-39 is affected by Glutathione, Methylmercuric chloride, Rotenone, Sodium arsenite, D-glucose, Bisphenol A, Juglone, Hydrolyzable Tannins, and Sirolimus; tiling array, RNA sequencing, and microarray studies indicate that …	190226	42	37	5	25.21	7.42	5.96e-14	9.05e-12	0	0	N	N
128	C17H1.7	WBGene00007660	pals-6	C17H1.7	C17H1.7,C17H1.7	-3.27505	1.82273	-2.48991	-2.70751	N.A.	N.A.	pals-6 is an ortholog of human ALS2CR12 (amyotrophic lateral sclerosis 2 chromosome region candidate 12); RNA sequencing and microarray studies indicate that pals-6 is affected by Nitric Oxide, D-glucose, Resveratrol, Quercetin, Humic substances, single-walled carbon nanotubes, Colistin, and Ag nanoparticles; microarray and tiling array studies indicate that pals-6 is enriched in the intestine an…	182749	39	33	6	24.25	7.41	6.38e-14	9.62e-12	0.49	3.02	Y	Y
129	B0238.1	WBGene00015067	B0238.1	B0238.1	B0238.1,B0238.1	1.29159	2.71464	1.95956	1.28911	N.A.	N.A.	RNA sequencing and microarray studies indicate that B0238.1 is affected by Ethanol, Rotenone, Bisphenol A, Atrazine, Cry5B, Diazinon, R24, single-walled carbon nanotubes, Paraquat, Allantoin, and Sirolimus; tiling array and RNA sequencing studies indicate that B0238.1 is enriched in the coelomocytes, excretory cell, hypodermis, intestine, and amphid sheath cell and in the dopaminergic neurons.	178912	43	37	6	25.46	7.4	6.77e-14	1.01e-11	0.6	0.13	Y	N
130	C34D10.2	WBGene00016407	C34D10.2	C34D10.2	C34D10.2a,C34D10.2b,C34D10.2:wp98,C34D10.2:wp133,C34D10.2b.1,C34D10.2b.2,C34D10.2a.1,C34D10.2a.2	6.08692	3.76149	4.95391	6.21815	N.A.	N.A.	C34D10.2 is an ortholog of human UNKL (unkempt family like zinc finger) and unk (unkempt family zinc finger); C34D10.2 is predicted to have metal ion binding activity, based on protein domain information.	181059	37	34	3	23.57	7.4	6.92e-14	1.03e-11	0	0.92	Y	Y
131	aakb-1	WBGene00010115	aakb-1	F55F3.1	F55F3.1,F55F3.1.1,F55F3.1.2	6.16614	4.32966	4.80119	5.32017	body wall musculature,head neuron,intestine,nerve ring neuron,pharyngeal muscle cell,pharyngeal neuron,pharyngeal-intestinal valve,pharynx,rectal valve cell,tail hypodermis,uterine muscle,vulval muscle	adult Ce,larva Ce	aakb-1 encodes one of two C. elegans AMP kinase (AMPK) beta regulatory subunits.	181492	44	39	5	25.69	7.38	7.92e-14	1.17e-11	0.74	0.89	Y	N
132	C06A12.3	WBGene00007357	C06A12.3	C06A12.3	C06A12.3a,C06A12.3b,C06A12.3c,C06A12.3a,C06A12.3b.1,C06A12.3b.2,C06A12.3c	1.56943	4.04081	6.32508	4.89081	N.A.	N.A.	C06A12.3 is an ortholog of human GSKIP (GSK3B interacting protein); RNA sequencing and microarray studies indicate that C06A12.3 is affected by wrn-1, tdp-1, daf-2, skn-1, cco-1, jmjd-1.2, hsf-1, sir-2.1, and pmk-1; RNA sequencing and microarray studies indicate that C06A12.3 is affected by Manganese chloride, Chlorpyrifos, Diazinon, Quercetin, Hydrolyzable Tannins, Humic substances, and Allantoi…	178529	39	37	2	24.06	7.35	9.9e-14	1.45e-11	0.33	0	N	N
134	sdz-24	WBGene00019495	sdz-24	K07E8.3	K07E8.3,K07E8.3.1,K07E8.3.2,K07E8.3.3	1.73151	5.97858	-1.7539	1.55417	N.A.	N.A.	sdz-24 is an ortholog of human RPA1 (replication protein A1); sdz-24 is involved in body morphogenesis, embryo development, lipid storage, locomotion, nematode larval development and oviposition; sdz-24 is predicted to have nucleic acid binding activity, based on protein domain information.	173457	43	34	9	25.16	7.31	1.31e-13	1.89e-11	0.61	1.12	N	N
135	F47B8.4	WBGene00009805	F47B8.4	F47B8.4	F47B8.4a,F47B8.4b,F47B8.4a,F47B8.4b	-1.09879	0.0796414	-5.19107	-3.07496	N.A.	N.A.	F47B8.4 is an ortholog of human GLRX5 (glutaredoxin 5); F47B8.4 is involved in innate immune response and lipid storage; F47B8.4 is predicted to have electron carrier activity and protein disulfide oxidoreductase activity, based on protein domain information.	179930	45	38	7	25.59	7.26	1.87e-13	2.67e-11	2	1.13	N	Y
136	abhd-5.1	WBGene00016506	abhd-5.1	C37H5.2	C37H5.2,C37H5.2	0.439996	1.57187	1.78644	-0.0382234	N.A.	N.A.	abhd-5.1 is an ortholog of human ABHD4 (abhydrolase domain containing 4); microarray and RNA sequencing studies indicate that abhd-5.1 is affected by lin-15B, atfs-1, spg-7, wdr-23, clk-1, wdr-5.1, wrn-1, daf-2, htz-1, daf-16, ham-3, swsn-2.2, hsf-1, let-418, chd-3, dpy-21, sir-2.1, hcf-1, and nuo-6; microarray and RNA sequencing studies indicate that abhd-5.1 is affected by Methylmercuric chlori…	183295	46	41	5	25.78	7.23	2.33e-13	3.3e-11	0.6	0	Y	N
137	F22B7.9	WBGene00017698	F22B7.9	F22B7.9	F22B7.9,F22B7.9	8.17001	4.69466	5.28268	3.89739	anterior hypodermis,Ea,Eal,Eala,Ealp,Ear,Eara,Earp,Ep,Epl,Epla,Eplp,Epr,Epra,Eprp	adult Ce,embryo Ce	F22B7.9 encodes a predicted methyltransferase; F22B7.9 reporter fusions are expressed in the intestine.	176213	45	36	9	25.43	7.22	2.61e-13	3.67e-11	0.46	0.45	Y	Y
138	hlh-13	WBGene00001957	hlh-13	F48D6.3	F48D6.3,F48D6.3	-2.46286	-1.95157	-5.00034	2.66301	ADEL,ADER,CEPDL,CEPDR,CEPVL,CEPVR,PDEL,PDER,tail neuron,ventral cord neuron	all stages Ce,L1 larva Ce,L2 larva Ce,L3 larva Ce,L4 larva Ce	hlh-13 is an ortholog of human FERD3L (Fer3 like bHLH transcription factor) and BHLHA9 (basic helix-loop-helix family member a9); hlh-13 is involved in embryo development, locomotion, nematode larval development and response to oxidative stress; hlh-13 is predicted to have protein dimerization activity, based on protein domain information; hlh-13 is expressed in all ventral cord neurons, tail neu…	185980	23	22	1	18.05	7.22	2.69e-13	3.75e-11	0.5	0.75	N	N
139	tps-1	WBGene00006602	tps-1	ZK54.2	ZK54.2a,ZK54.2b,ZK54.2:wp152,ZK54.2:wp153,ZK54.2b.1,ZK54.2b.2,ZK54.2b.3,ZK54.2a.1,ZK54.2a.2,ZK54.2a.3,ZK54.2a.4	4.61957	3.73373	5.77686	4.80785	anal depressor muscle,anal sphincter muscle,body wall musculature,gonadal sheath cell,head neuron,intestine,muscle cell,nervous system,neuron,reproductive system	adult Ce,larva Ce	tps-1 is involved in determination of adult lifespan; tps-1 is predicted to have catalytic activity, based on protein domain information; tps-1 is expressed in the muscle cell, nervous system, reproductive system, intestine, and the body wall musculature.	181778	43	36	7	24.81	7.21	2.84e-13	3.95e-11	2.18	1.34	Y	N
140	adt-2	WBGene00000083	adt-2	F08C6.1	F08C6.1a,F08C6.1b,F08C6.1c,F08C6.1:wp98,F08C6.1a.1,F08C6.1a.2,F08C6.1c.1,F08C6.1c.2,F08C6.1b.1,F08C6.1b.2	5.33221	3.75477	3.08735	2.44884	amphid socket cell,IL socket cell,OL socket cell,PDE socket cell,phasmid socket cell,vulva	adult Ce,L1 larva Ce,L2 larva Ce,L3 larva Ce,L4 larva Ce	adt-2 encodes a member of the ADAMTS (a disintegrin and metalloprotease with thrombospodin motif) family of secreated metalloproteases; ADT-2 binds to extracellular matrix and is involved in remodeling of the extracellular matrix; homozygous adt-2 mutants die at the 3-fold stage of embryogenesis or during hatching; adult worms are about 20% reduced body length as compared to the wild type; adt-2 …	181022	44	39	5	24.96	7.16	3.9e-13	5.37e-11	0.11	0.13	N	N
141	B0238.12	WBGene00015076	B0238.12	B0238.12	B0238.12,B0238.12	0.558871	3.73581	2.8991	3.62344	N.A.	N.A.	B0238.12 encodes a putative secreted TIL-domain protease inhibitor paralogous to SWM-1, ISL-1, and the products of 11 other C. elegans genes; B0238.12 and its relatives are collectively similar to other TIL-domain protease inhibitors from nematodes, insects, and vertebrates; B0238.12 has no obvious function in mass RNAi assays.	178914	27	23	4	19.4	7.15	4.48e-13	6.13e-11	0.58	0.28	N	N
142	far-3	WBGene00001387	far-3	F15B9.1	F15B9.1,F15B9.1	6.05549	5.15041	1.70268	1.19015	hypodermis,intestine,male,vulva	adult Ce,adult hermaphrodite Ce,embryo Ce,L1 larva Ce,L2 larva Ce,L3 larva Ce,L4 larva Ce,larva Ce	far-3 is predicted to have lipid binding activity, based on protein domain information; far-3 is expressed in the hypodermis, intestine, vulva, and in the male.	179785	46	36	10	25.44	7.14	4.71e-13	6.39e-11	2.7	0.53	Y	N
144	C30G12.2	WBGene00016274	C30G12.2	C30G12.2	C30G12.2,C30G12.2	-1.10916	3.20358	-3.63496	-4.38949	N.A.	N.A.	RNA sequencing and microarray studies indicate that C30G12.2 is affected by Ethanol, Tryptophan, 1-methylnicotinamide, Rotenone, Manganese chloride, D-glucopyranose, Sodium arsenite, D-glucose, Atrazine, Chlorpyrifos, Diazinon, Cry5B, Humic substances, Colistin, Dafa#1, Ethosuximide, and Sirolimus; sage analysis, tiling array, RNA sequencing, and microarray studies indicate that C30G12.2 is enric…	174195	43	35	8	24.57	7.14	4.76e-13	6.38e-11	0.34	0.46	Y	Y
145	abf-2	WBGene00000013	abf-2	C50F2.10	C50F2.10,C50F2.10	2.77895	4.01177	1.74515	0.419834	excretory cell,marginal cell,pharyngeal neuron	adult Ce,embryo Ce,L1 larva Ce,L2 larva Ce,L3 larva Ce,L4 larva Ce	abf-2 encodes an antimicrobial peptide homologous to Ascaris suum antibacterial factor ASABF, and closely related to ABF-1; recombinant ABF-2 displays strong microbicidal activity against Gram-negative and Gram-positive bacteria, as well as fungi; on account of ABF-2's antimicrobial activity, sequence similarity, and expression in the pharyngeal marginal zone, ABF-2 is thought to mediate an antim…	266826	15	15	0	14.38	7.14	4.81e-13	6.4e-11	1	0.13	N	N
146	pccb-1	WBGene00018701	pccb-1	F52E4.1	F52E4.1a,F52E4.1b,F52E4.1b,F52E4.1a.1,F52E4.1a.2	8.46237	7.46939	8.61527	6.89417	body wall musculature,intestine	adult Ce,embryo Ce,L1 larva Ce,L2 larva Ce,L3 larva Ce,L4 larva Ce	F52E4.1 is orthologous to the human gene PROPIONYL-CoA CARBOXYLASE, BETA SUBUNIT (PCCB; OMIM:232050), which when mutated leads to propionicacidemia; F52E4.1 protein is predicted to be mitochondrial.	180596	36	34	2	22.35	7.11	5.89e-13	7.78e-11	0.74	1.75	Y	Y
147	T28D9.3	WBGene00020895	T28D9.3	T28D9.3	T28D9.3a,T28D9.3b,T28D9.3d,T28D9.3:wp127,T28D9.3c:wp247,T28D9.3e:wp247,T28D9.3c,T28D9.3e,T28D9.3d,T28D9.3b.1,T28D9.3b.2,T28D9.3a	0.194488	3.38076	2.8703	-0.474969	N.A.	N.A.	plpp-1.2 is an ortholog of human PLPP3 (phospholipid phosphatase 3), PLPP1 (phospholipid phosphatase 1) and PLPP2 (phospholipid phosphatase 2); RNA sequencing and microarray studies indicate that T28D9.3 is affected by egl-5, alg-3, alg-4, daf-2, elt-2, sir-2.1, ain-1, mdt-15, daf-16, alg-1, dpy-9, dpy-10, ash-2, lin-54, mir-35, ain-2, hlh-29, tbx-2, acs-3, and nuo-6; microarray and RNA sequencin…	174071	46	39	7	25.32	7.1	6.04e-13	7.92e-11	0	0.23	N	N
148	pmt-1	WBGene00022781	pmt-1	ZK622.3	ZK622.3a,ZK622.3b,ZK622.3d,ZK622.3a:wp94,ZK622.3c:wp245,ZK622.3c,ZK622.3d.1,ZK622.3d.2,ZK622.3d.3,ZK622.3d.4,ZK622.3d.5,ZK622.3d.6,ZK622.3d.7,ZK622.3a.1,ZK622.3a.2,ZK622.3a.3,ZK622.3b.1,ZK622.3b.2	10.258	6.53084	6.2471	4.54426	hypodermis,seam cell	adult Ce,embryo Ce,L1 larva Ce,L2 larva Ce,L3 larva Ce,L4 larva Ce	pmt-1 encodes, by alternative splicing, four isoforms of an experimentally validated phosphoethanolamine N-methyltransferase required for phosphocholine biosynthesis and viability; PMT-1 lacks known mammalian orthologs, but has orthologs in parasitic nematodes, fish, amphibians, echinoderms, plants, alveolata, and bacteria; PMT-1 is distantly paralogous to PMT-2; PMT-1 catalyses the conversion of…	173901	45	38	7	24.98	7.09	6.84e-13	8.92e-11	0.21	0.71	Y	N
149	D1086.3	WBGene00008390	D1086.3	D1086.3	D1086.3,D1086.3	4.82088	4.51247	2.77722	0.0749858	N.A.	N.A.	Microarray and RNA sequencing studies indicate that D1086.3 is affected by Heme, Methylmercuric chloride, Tunicamycin, Mianserin, D-glucose, Bisphenol A, Cholestanol, Progesterone, Deoxyglucose, Fluoranthene, Diazinon, Chlorpyrifos, Quercetin, Humic substances, R24, adsorbable organic bromine compounds, Sirolimus, and Ag nanoparticles; tiling array, RNA sequencing, and microarray studies indicate…	179907	44	36	8	24.66	7.08	7.4e-13	9.58e-11	1.6	1.77	Y	Y
150	F13H8.11	WBGene00017443	F13H8.11	F13H8.11	F13H8.11,F13H8.11	-3.81124	0.935947	-3.29722	-1.4582	N.A.	N.A.	F13H8.11 is an ortholog of human PLB1 (phospholipase B1); F13H8.11 is predicted to have hydrolase activity, acting on ester bonds, based on protein domain information.	174036	31	29	2	20.56	7.06	8.61e-13	1.11e-10	0.82	1.45	Y	Y
151	R13H4.5	WBGene00011263	R13H4.5	R13H4.5	R13H4.5,R13H4.5	5.70071	3.41777	3.02508	5.82492	anal depressor muscle,excretory cell,hypodermis,intestine,neuron,pharynx,rectal muscle,vulva	adult Ce,embryo Ce,L1 larva Ce,L2 larva Ce,L3 larva Ce,L4 larva Ce	This gene encodes a protein containing an F-box, a motif predicted to mediate protein-protein interactions either with homologs of yeast Skp-1p or with other proteins.	179625	43	40	3	24.19	7.02	1.09e-12	1.39e-10	0	0.82	N	N
152	asm-2	WBGene00000212	asm-2	ZK455.4	ZK455.4,ZK455.4:wp83,ZK455.4	0.221292	1.2436	-4.40579	-1.51256	N.A.	N.A.	asm-2 encodes a protein similar to human acid sphingomyelinase (ASM) or sphingomyelin phosphodiesterase 1; the ASM-2 protein has a putative secretory signal peptide at the N-terminus, saposin-like and proline-rich domains and putative N-linked glycosylation sites; asm-2 shows phosphodiesterase activity when expressed in COS-7 cells; like mammalian ASM, asm-2 is probably both intracellular and sec…	181323	34	33	1	21.38	7	1.29e-12	1.63e-10	0.32	1.72	N	Y
153	C08E3.13	WBGene00015605	C08E3.13	C08E3.13	C08E3.13,C08E3.13.1,C08E3.13.2	1.65114	8.16062	-2.96732	-2.04701	intestine,vulva	N.A.	C08E3.13 encodes a novel protein; expression studies indicate that C08E3.13 expression is positively regulated by signaling through the DBL-1/TGF-beta signaling pathway; in situ hybridization experiments reveal that C08E3.13 transcripts are expressed in the intestine and the vulva.	182405	38	30	8	22.62	7	1.32e-12	1.67e-10	0	0.51	N	N
155	F47B10.9	WBGene00009820	F47B10.9	F47B10.9	F47B10.9,F47B10.9	3.5805	0.974748	-0.351854	-1.58564	N.A.	N.A.	F47B10.9 is an ortholog of human BTBD19 (BTB domain containing 19); RNA sequencing and microarray studies indicate that F47B10.9 is affected by Rotenone, Humic substances, Paraquat, and Sirolimus; RNA sequencing studies indicate that F47B10.9 is enriched in the germ line, Z4, Z1, gon_male_dtc posterior, gon_male_dtc anterior, Z1.p, and Z4.a.	185906	41	35	6	23.42	6.97	1.64e-12	2.04e-10	1.04	0.91	N	N
157	nceh-1	WBGene00012810	nceh-1	Y43F8A.3	Y43F8A.3a,Y43F8A.3b,Y43F8A.3:wp142,Y43F8A.3b,Y43F8A.3a	3.11319	-0.0438293	-3.098	-2.14753	N.A.	N.A.	nceh-1 is an ortholog of human AADAC (arylacetamide deacetylase) and members of the AADAC (Arylacetamide deacetylase) family including AADACL4; nceh-1 is predicted to have carboxylic ester hydrolase activity, based on protein domain information.	189866	37	34	3	22.2	6.96	1.71e-12	2.1e-10	0.67	2.98	N	Y
158	F15B9.6	WBGene00008850	F15B9.6	F15B9.6	F15B9.6,F15B9.6:wp194,F15B9.6	-3.86768	3.53055	-4.15454	-4.36137	N.A.	N.A.	Microarray and RNA sequencing studies indicate that F15B9.6 is affected by Heme, Methylmercury hydroxide, 1-methylnicotinamide, Rotenone, Mianserin, Sodium arsenite, D-glucose, Bisphenol A, Cry5B, Humic substances, Paraquat, Dafa#1, Sirolimus, and Ag nanoparticles; microarray studies indicate that F15B9.6 is enriched in the PVD and OLL neurons.	184523	38	30	8	22.41	6.93	2.12e-12	2.58e-10	1.26	1.68	N	N
159	C54D10.10	WBGene00008304	C54D10.10	C54D10.10	C54D10.10,C54D10.10:wp189,C54D10.10	1.50513	2.99013	1.70838	3.91902	head neuron,nervous system,pharynx,reproductive system,seam cell,tail neuron,vulval muscle	adult Ce,larva Ce	C54D10.10 is an ortholog of human TFPI2 (tissue factor pathway inhibitor 2), TFPI (tissue factor pathway inhibitor) and WFDC8 (WAP four-disulfide core domain 8); C54D10.10 is predicted to have serine-type endopeptidase inhibitor activity, based on protein domain information; C54D10.10 is expressed in the pharynx, nervous system, reproductive system, and the seam cell.	183787	39	34	5	22.64	6.91	2.47e-12	2.99e-10	1.89	0.13	Y	N
160	gst-3	WBGene00001751	gst-3	K08F4.11	K08F4.11,K08F4.11	0.389569	1.05768	2.51735	1.40573	N.A.	N.A.	gst-3 encodes a predicted glutathione S-transferase.	177883	34	30	4	21.11	6.91	2.47e-12	2.98e-10	0.23	0.97	Y	N
161	twk-33	WBGene00006685	twk-33	W06D12.5	W06D12.5,W06D12.5:wp252,W06D12.5	2.01121	1.09669	-0.139054	1.87791	N.A.	N.A.	twk-33 is predicted to have potassium channel activity, based on protein domain information.	180161	34	31	3	21.1	6.91	2.49e-12	2.99e-10	0.36	4.29	Y	Y
162	T05F1.11	WBGene00011495	T05F1.11	T05F1.11	T05F1.11,T05F1.11:wp90,T05F1.11	-3.7312	1.25741	-0.5266	-1.12518	N.A.	N.A.	This gene encodes a protein containing an F-box, a motif predicted to mediate protein-protein interactions either with homologs of yeast Skp-1p or with other proteins.	172811	31	24	7	20.12	6.9	2.56e-12	3.05e-10	1	1.06	Y	N
164	aldo-2	WBGene00017166	aldo-2	F01F1.12	F01F1.12a,F01F1.12b,F01F1.12b.1,F01F1.12b.2,F01F1.12a.1,F01F1.12a.2	11.3315	8.27819	8.00203	6.46396	C,Cell,hyp7 syncytium	adult Ce,elongating embryo Ce,embryo Ce,fully-elongated embryo Ce,L1 larva Ce,L2 larva Ce,L3 larva Ce,L4 larva Ce,late cleavage stage embryo Ce	aldo-2 encodes a fructose-bisphosphate aldolase homologous to human ALDOB, which when mutated leads to fructosemia, hereditary fructose intolerance (OMIM:229600).	175827	46	40	6	24.57	6.89	2.81e-12	3.31e-10	0.15	1.73	Y	Y
166	sod-1	WBGene00004930	sod-1	C15F1.7	C15F1.7a,C15F1.7b,C15F1.7:wp134,C15F1.7a,C15F1.7b.1,C15F1.7b.2	9.44652	6.11426	6.9422	6.74483	Cell,somatic gonad	N.A.	sod-1 encodes the copper/zinc superoxide dismustase, an enzyme that is known to protect cells from oxidative damage; superoxide dismutase activity can be detected in worm extracts; sod-1 activity has been implicated in the increased life-span of dauer larvae where this enzyme demonstrates the highest activity compared to other life-stages as well as in the increased life span of age-1 mutants and…	174141	42	40	2	23.42	6.88	3.04e-12	3.53e-10	0	0	Y	N
167	T28C6.7	WBGene00012121	T28C6.7	T28C6.7	T28C6.7a,T28C6.7b,T28C6.7c,T28C6.7d,T28C6.7:wp92,T28C6.7:wp156,T28C6.7:wp199,T28C6.7a.1,T28C6.7a.2,T28C6.7d.1,T28C6.7d.2,T28C6.7c.1,T28C6.7c.2,T28C6.7b.1,T28C6.7b.2	5.10603	4.66301	5.38164	5.50102	body wall musculature,excretory cell,head neuron,hypodermis,intestine,mu_int_L,mu_int_R,nervous system,neuron,pharynx,tail,tail neuron,vulva	adult Ce,larva Ce	T28C6.7 is expressed in the pharynx, hypodermis, nervous system, tail, intestine, excretory cell, body wall musculature, and the vulva.	177697	37	33	4	21.93	6.87	3.14e-12	3.62e-10	0	0.91	N	N
168	ZK899.1	WBGene00014140	ZK899.1	ZK899.1	ZK899.1,ZK899.1	4.70781	3.98935	4.06692	4.29372	N.A.	N.A.	Microarray, tiling array, and RNA sequencing studies indicate that ZK899.1 is affected by cyc-1, daf-12, hpl-2, eat-2, emr-1, lem-2, hlh-30, daf-2, swsn-2.2, let-418, chd-3, sir-2.1, dcr-1, ain-2, tdp-1, tbx-2, acs-3, and nhr-25; microarray studies indicate that ZK899.1 is affected by Cry5B, Diazinon, Hydrolyzable Tannins, Humic substances, and Sirolimus; tiling array, RNA sequencing, and microar…	191453	46	37	9	24.49	6.87	3.31e-12	3.8e-10	0.81	1.48	Y	Y
169	gsto-1	WBGene00016204	gsto-1	C29E4.7	C29E4.7,C29E4.7	1.56918	1.84807	-2.42285	-2.92975	intestine	adult Ce,fully-elongated embryo Ce,L1 larva Ce,L2 larva Ce,L3 larva Ce,L4 larva Ce	gsto-1 encodes an experimentally verified thiol oxidoreductase and dehydroascorbate reductase, required for normal stress resistance; formally, GSTO-1 is an omega-class glutathione transferase (GST; EC 2.5.1.18), but it has little activity in vitro on classic GST substrates; GSTO-1 is expressed in postembryonic intestine; gsto-1(RNAi) induces hypersensitivity to heat-, arsenite-, juglone-, paraqu…	183000	45	37	8	24.21	6.86	3.36e-12	3.84e-10	1.49	2	N	N
170	slc-36.5	WBGene00016628	slc-36.5	C44B7.6	C44B7.6a,C44B7.6b,C44B7.6a.1,C44B7.6a.2,C44B7.6b	-2.02613	-1.18193	0.184419	-0.0662623	N.A.	N.A.	slc-36.5 is an ortholog of members of the human SLC (Solute carriers) family including SLC36A3; microarray and RNA sequencing studies indicate that slc-36.5 is affected by Methylmercuric chloride, Mercuric Chloride, Tunicamycin, D-glucose, Resveratrol, Cry5B, Quercetin, Humic substances, Selenium, Dafa#1, Sirolimus, and Allantoin; tiling array studies indicate that slc-36.5 is enriched in the ger…	174125	37	32	5	21.89	6.86	3.49e-12	3.96e-10	0.12	1.29	Y	N
171	cyp-34A8	WBGene00015043	cyp-34A8	B0213.14	B0213.14,B0213.14:wp186,B0213.14.1,B0213.14.2	4.21029	2.57505	2.72461	1.61951	N.A.	N.A.	cyp-34A8 is an ortholog of human CYP21A2 (cytochrome P450 family 21 subfamily A member 2) and members of the CYP2 (Cytochrome P4502) family including CYP2E1; cyp-34A8 is predicted to have heme binding activity, iron ion binding activity, and oxidoreductase activity, acting on paired donors, with incorporation or reduction of molecular oxygen, based on protein domain information.	181850	35	30	5	21.25	6.85	3.7e-12	4.18e-10	1.34	0.27	Y	N
173	C55A6.3	WBGene00008332	C55A6.3	C55A6.3	C55A6.3,C55A6.3:wp152,C55A6.3:wp185,C55A6.3	2.54309	1.97411	3.43461	1.44105	N.A.	N.A.	Tiling array, microarray, proteomic, and RNA sequencing studies indicate that C55A6.3 is affected by daf-12, spe-44, gld-1, let-7, csr-1, daf-2, glp-1, fog-3, daf-16, jmjd-3.1, dpy-9, dpy-10, and hcf-1; RNA sequencing and microarray studies indicate that C55A6.3 is affected by Rotenone, Acrylamide, Hydrolyzable Tannins, Humic substances, and Paraquat; RNA sequencing studies indicate that C55A6.3 …	183832	44	37	7	23.86	6.84	3.89e-12	4.34e-10	0.61	0.26	Y	N
175	F54F7.3	WBGene00010065	F54F7.3	F54F7.3	F54F7.3,F54F7.3	0.986681	5.87127	5.17616	-2.12522	N.A.	N.A.	RNA sequencing and microarray studies indicate that F54F7.3 is affected by Ethanol, Rotenone, Sodium arsenite, D-glucose, Resveratrol, Fluoranthene, Chlorpyrifos, single-walled carbon nanotubes, and Sirolimus; RNA sequencing studies indicate that F54F7.3 is enriched in the germ line and amphid sheath cell.	181361	46	37	9	24.25	6.8	5.36e-12	5.91e-10	1.55	0.64	Y	N
176	T01C3.11	WBGene00011325	T01C3.11	T01C3.11	T01C3.11a,T01C3.11b,T01C3.11a.1,T01C3.11a.2,T01C3.11b	-3.03054	0.470051	-2.49347	-2.08786	N.A.	N.A.	T01C3.11 is involved in apoptotic process, embryo development, the molting cycle, nematode larval development and oogenesis.	3565980	31	29	2	19.82	6.8	5.42e-12	5.93e-10	1.07	0.73	Y	N
177	C40H1.2	WBGene00008038	C40H1.2	C40H1.2	C40H1.2,C40H1.2	-1.62111	2.12827	-4.14951	-3.11578	N.A.	N.A.	Microarray and RNA sequencing studies indicate that C40H1.2 is affected by rheb-1, cyc-1, daf-2, rsks-1, bar-1, clk-1, hpk-1, npr-1, jmjd-1.2, hsf-1, rbr-2, daf-16, sir-2.1, osm-8, tdp-1, and lin-35; microarray studies indicate that C40H1.2 is affected by Tryptophan, Methylmercuric chloride, Tunicamycin, Cry5B, Quercetin, Humic substances, Dafa#1, and Sirolimus.	183365	45	38	7	23.95	6.79	5.67e-12	6.18e-10	0.53	1.04	N	N
179	tat-4	WBGene00020784	tat-4	T24H7.5	T24H7.5a,T24H7.5b,T24H7.5c,T24H7.5:wp17,T24H7.5a,T24H7.5c.1,T24H7.5c.2,T24H7.5b	4.07496	4.13862	3.58631	2.48366	anterior gonad arm,intestine,pharyngeal-intestinal valve,rectal gland cell,spermatheca,uterus	2-fold embryo Ce,3-fold embryo Ce,adult Ce	tat-4 encodes one of six C. elegans subfamily IV P-type ATPase that, by sequence similarity, is proposed to function as an aminophospholipid translocase (flippase); loss of tat-4 function via RNAi or deletion mutation results in no obvious developmental or morphological defects, however tat-4 deletion mutants are hypersensitive to sterol deprivation and this hypersensitivity is enhanced by a muta…	174031	22	22	0	16.6	6.78	6.12e-12	6.6e-10	1	0.3	Y	N
180	grd-3	WBGene00001692	grd-3	W05E7.1	W05E7.1,W05E7.1:wp100,W05E7.1	8.44099	4.76862	4.93043	4.90873	hypodermis,seam cell	adult Ce	grd-3 encodes a hedgehog-like protein, with an N-terminal signal sequence and a C-terminal Ground domain; GRD-3 is expressed in adult anterior and posterior seam cells, overlapping GRD-5 expression; GRD-3 is also strongly expressed upon infection with the gram-negative bacterium Serratia marcescens, indicating that GRD-3 may be part of C. elegans' innate immunity response; the Ground domain is pr…	177109	44	41	3	23.54	6.75	7.52e-12	8.06e-10	1.67	1.17	Y	N
181	dhs-31	WBGene00011424	dhs-31	T04B2.6	T04B2.6,T04B2.6a:wp243,T04B2.6	4.78767	-1.32295	-0.142896	-0.983756	hypodermis,vulB1,vulB2,vulD,vulva	3-fold embryo Ce,adult Ce,embryo Ce,fully-elongated embryo Ce,L1 larva Ce,L2 larva Ce,L3 larva Ce,L4 larva Ce	dhs-31 is expressed in the hypodermis and the vulva.	188051	38	36	2	21.82	6.74	7.76e-12	8.27e-10	0.21	0	Y	N
182	bcmo-2	WBGene00018755	bcmo-2	F53C3.12	F53C3.12,F53C3.12:wp90,F53C3.12	1.82187	3.37565	1.63176	3.03537	N.A.	N.A.	bcmo-2 is an ortholog of human RPE65 (RPE65, retinoid isomerohydrolase), BCO1 (beta-carotene oxygenase 1) and BCO2 (beta-carotene oxygenase 2); bcmo-2 is predicted to have oxidoreductase activity, acting on single donors with incorporation of molecular oxygen, incorporation of two atoms of oxygen, based on protein domain information.	173733	46	37	9	24.05	6.74	7.89e-12	8.36e-10	1.45	0.83	Y	Y
183	lec-4	WBGene00002267	lec-4	C44F1.3	C44F1.3,C44F1.3.1,C44F1.3.2	6.0454	6.64588	6.73001	5.34248	N.A.	N.A.	lec-4 encodes a predicted galectin that exhibits sugar binding properties in vitro.	175488	45	37	8	23.72	6.72	9.02e-12	9.51e-10	1.15	0.64	Y	N
184	tre-4	WBGene00006610	tre-4	F15A2.2	F15A2.2,F15A2.2:wp109,F15A2.2	-1.64512	1.59387	1.17445	1.74335	excretory cell,head neuron,hypodermis,intestine,nervous system,neuron,pharynx,reproductive system,spermatheca,tail,tail neuron,vulva	adult Ce,larva Ce	tre-4 is an ortholog of human Treh (trehalase); tre-4 is predicted to have alpha,alpha-trehalase activity, based on protein domain information; tre-4 is expressed in the pharynx, hypodermis, nervous system, tail, reproductive system, intestine, and the excretory cell.	184505	38	35	3	21.62	6.68	1.19e-11	1.25e-09	0.12	1	N	N
185	D1086.9	WBGene00008396	D1086.9	D1086.9	D1086.9,D1086.9	-6.41507	-1.2933	-3.03456	-4.55611	N.A.	N.A.	D1086.9 is an ortholog of human CLIC6 (chloride intracellular channel 6), SAMD15 (sterile alpha motif domain containing 15) and MDN1 (midasin AAA ATPase 1); microarray and RNA sequencing studies indicate that D1086.9 is affected by age-1, daf-2, rsks-1, prg-1, clk-1, daf-16, and hrp-2; RNA sequencing and microarray studies indicate that D1086.9 is affected by Rotenone, Multi-walled carbon nanotub…	179910	20	18	2	15.59	6.68	1.2e-11	1.25e-09	2.7	0.51	Y	N
187	poml-2	WBGene00017089	poml-2	E01A2.7	E01A2.7,E01A2.7	1.92256	1.27221	-0.917029	-1.3064	N.A.	N.A.	The E01A2.7 gene encodes one of five paraoxonase-like proteins; it is homologous to the human genes PARAOXONASE 1 gene (PON1, OMIM:168820) and PARAOXONASE 2 (OMIM:602447), which in some allelic forms are associated with susceptibility to coronary artery disease or to variations in fasting plasma glucose.	171999	39	33	6	21.83	6.66	1.41e-11	1.46e-09	2.48	2.25	N	N
188	Y37E11B.7	WBGene00021379	Y37E11B.7	Y37E11B.7	Y37E11B.7a,Y37E11B.7b,Y37E11B.7a,Y37E11B.7b	0.516142	1.85144	-2.18043	-0.570767	N.A.	N.A.	Tiling array, RNA sequencing, and microarray studies indicate that Y37E11B.7 is affected by daf-16, tatn-1, blmp-1, bar-1, clk-1, csr-1, daf-2, swsn-2.2, npr-1, dcr-1, crh-1, tax-6, daf-19, mir-35, and nuo-6; RNA sequencing and microarray studies indicate that Y37E11B.7 is affected by Nitric Oxide, D-glucose, Cadmium, Paraquat, Dafa#1, and Sirolimus; tiling array and RNA sequencing studies indica…	177121	43	36	7	22.93	6.65	1.46e-11	1.5e-09	1.55	0.51	Y	N
189	swt-3	WBGene00007384	swt-3	C06G8.1	C06G8.1,C06G8.1	7.48862	3.72269	2.13835	2.87781	body wall musculature,hypodermis,intestine	adult Ce,larva Ce	swt-3 is an ortholog of human SLC50A1 (solute carrier family 50 member 1); swt-3 is expressed in the hypodermis, intestine, and the body wall musculature.	177972	44	38	6	23.18	6.64	1.53e-11	1.56e-09	0.44	0.13	N	N
192	C37H5.13	WBGene00016511	C37H5.13	C37H5.13	C37H5.13a,C37H5.13b,C37H5.13c,C37H5.13b,C37H5.13c,C37H5.13a	2.83305	4.85101	5.42065	5.7401	N.A.	N.A.	C37H5.13 is an ortholog of human ACOT8 (acyl-CoA thioesterase 8); C37H5.13 is predicted to have acyl-CoA hydrolase activity, based on protein domain information.	178878	45	43	2	23.39	6.63	1.73e-11	1.73e-09	0.19	0.15	Y	Y
193	K04C2.3	WBGene00019381	K04C2.3	K04C2.3	K04C2.3a,K04C2.3b,K04C2.3a,K04C2.3b.1,K04C2.3b.2	4.22829	4.91574	5.83266	5.55297	N.A.	N.A.	Microarray, tiling array, and RNA sequencing studies indicate that K04C2.3 is affected by cgh-1, cyc-1, daf-16, daf-12, gld-2, fog-3, swsn-2.2, daf-2, jmjd-3.1, jmjd-1.2, hsf-1, sir-2.1, slr-2, fbf-1, rnp-8, and gld-1; RNA sequencing and microarray studies indicate that K04C2.3 is affected by Rotenone, Atrazine, Chlorpyrifos, Humic substances, Paraquat, and Sirolimus; tiling array, RNA sequencing…	175958	35	30	5	20.54	6.62	1.85e-11	1.85e-09	0.63	1.91	Y	Y
194	poml-4	WBGene00044697	poml-4	K05F6.11	K05F6.11,K05F6.11:wp191,K05F6.11	1.39176	-1.83126	-1.71657	-4.03287	N.A.	N.A.	poml-4 is an ortholog of human PON1 (paraoxonase 1), PON2 (paraoxonase 2) and PON3 (paraoxonase 3); poml-4 is predicted to have arylesterase activity, based on protein domain information.	4363028	13	13	0	12.4	6.61	1.88e-11	1.87e-09	0.36	1.91	N	N
195	H36L18.2	WBGene00010424	H36L18.2	H36L18.2	H36L18.2a,H36L18.2b,H36L18.2:wp246,H36L18.2b,H36L18.2a	6.79689	8.28032	8.53716	7.91018	N.A.	N.A.	RNA sequencing and microarray studies indicate that H36L18.2 is affected by Rotenone, D-glucose, Cholestanol, Atrazine, Quercetin, Humic substances, Paraquat, Sirolimus, and Ag nanoparticles; RNA sequencing and microarray studies indicate that H36L18.2 is enriched in the germ line, Psub1, Z4, Z1, gon_male_dtc posterior, gon_male_dtc anterior, Z1.p, Z4.a, muscle cell, intestine, body wall musculat…	181411	45	39	6	23.33	6.61	1.94e-11	1.92e-09	0.69	0.29	Y	N
196	ZC196.2	WBGene00022546	ZC196.2	ZC196.2	ZC196.2,ZC196.2:wp231,ZC196.2	-0.0875495	-2.38981	-0.894895	-2.0208	N.A.	N.A.	ZC196.2 is an ortholog of human MOSPD3 (motile sperm domain containing 3), VAPA (VAMP associated protein A) and VAPB (VAMP associated protein B and C); microarray, tiling array, and RNA sequencing studies indicate that ZC196.2 is affected by cyc-1, lin-15B, lin-35, daf-16, hpl-2, prp-8, daf-2, rsks-1, bar-1, fbf-1, clk-1, wrn-1, glp-1, hsf-1, daf-12, dpy-21, and nuo-6; microarray and RNA sequenci…	191101	36	31	5	20.77	6.59	2.14e-11	2.11e-09	1.69	1.23	Y	N
199	unc-84	WBGene00006816	unc-84	F54B11.3	F54B11.3a,F54B11.3b,F54B11.3:wp51,F54B11.3a:wp53,F54B11.3a,F54B11.3b	3.66825	3.68069	4.17021	4.28106	Cell,oocyte	adult Ce,elongating embryo Ce,enclosing embryo Ce,fully-elongated embryo Ce,gastrulating embryo Ce,L1 larva Ce,L2 larva Ce,L3 larva Ce,L4 larva Ce,postembryonic Ce	unc-84 encodes an inner nuclear membrane protein that contains a SUN domain with homology to S. pombe Sad1 and is paralogous to sun-1; SUN proteins include Drosophila Klaroid and CG6589, and mammalian SUN1, SUN2, SUN3 and Spag4; SUN-domain proteins bind lamins and the KASH domain proteins of the outer nuclear membrane; UNC-84 affects nuclear migration and anchoring of various cell types together …	181480	44	37	7	22.95	6.58	2.42e-11	2.34e-09	0	0.13	Y	Y
200	egl-13	WBGene00001182	egl-13	T22B7.1	T22B7.1a,T22B7.1b,T22B7.1c,T22B7.1d,T22B7.1e,T22B7.1f,T22B7.1g,T22B7.1h,T22B7.1a.1,T22B7.1a.2,T22B7.1c,T22B7.1e,T22B7.1b,T22B7.1d,T22B7.1f.1,T22B7.1f.2,T22B7.1f.3	3.96033	4.10338	4.58058	5.55824	amphid neuron,AQR,BAGL,BAGR,body wall musculature,developing hermaphrodite gonad,head,head neuron,intestinal cell,nerve ring neuron,neuron,PQR,QL.ap nucleus,QR.ap nucleus,tail,tail neuron,URXL,URXR,uterine pi cell,uterine seam cell,vulval cell,vulval muscle	adult Ce,elongating embryo Ce,fully-elongated embryo Ce,L1 larva Ce,L2 larva Ce,L3 larva Ce,L4 larva Ce,larva Ce	egl-13 encodes a SOX domain transcription factor; egl-13 is required for maintenance of the uterine pi cell fate; mutations in egl-13 affect the cell fusion process that makes the vulval-uterine connection and consequently egg laying; egl-13 is expressed in the pi cells, transiently expressed in the rho lineage, in the anchor cell following fusion, and in neurons, body wall muscles, and intestina…	180833	35	31	4	20.37	6.56	2.68e-11	2.58e-09	0.32	0.59	N	N
201	ctl-3	WBGene00013220	ctl-3	Y54G11A.13	Y54G11A.13a,Y54G11A.13b,Y54G11A.13a,Y54G11A.13b	-1.15206	0.932977	-1.49003	0.379542	neuron,pharyngeal muscle cell	N.A.	ctl-3 encodes one of three C. elegans catalases; CTL-3 is predicted to function as an antioxidant enzyme that protects cells from reactive oxygen species; a ctl-3 promoter gfp fusion construct is expressed in pharyngeal muscles and neuronal cell bodies; loss of ctl-3 activity via RNAi results in no obvious abnormalities.	175086	36	31	5	20.64	6.55	2.84e-11	2.73e-09	0.77	0	N	N
202	npr-8	WBGene00016984	npr-8	C56G3.1	C56G3.1a,C56G3.1b,C56G3.1b,C56G3.1a.1,C56G3.1a.2	0.263132	0.543327	1.31118	3.80393	N.A.	N.A.	npr-8 is predicted to have neuropeptide Y receptor activity, based on protein domain information.	183869	34	28	6	20.02	6.55	2.97e-11	2.83e-09	1.02	0.94	N	N
203	dur-1	WBGene00001113	dur-1	F25H8.5	F25H8.5a,F25H8.5b,F25H8.5c,F25H8.5d,F25H8.5e,F25H8.5f,F25H8.5g,F25H8.5h,F25H8.5i,F25H8.5j,F25H8.5k,F25H8.5l,F25H8.5m,F25H8.5n,F25H8.5o,F25H8.5p,F25H8.5q,F25H8.5r,F25H8.5s,F25H8.5a:wp108,F25H8.5b:wp108,F25H8.5c:wp108,F25H8.5c:wp212,F25H8.5b,F25H8.5g,F25H8.5r,F25H8.5q,F25H8.5a,F25H8.5e.1,F25H8.5e.2,F25H8.5s,F25H8.5j,F25H8.5n,F25H8.5i,F25H8.5m,F25H8.5d,F25H8.5c,F25H8.5h,F25H8.5l,F25H8.5p,F25H8.5k,F2…	3.02636	6.43335	6.06815	3.00667	N.A.	N.A.	The dur-1 ('Dauer UpRegulated') gene encodes proteins (DUR-1A and DUR-1C) that are predicted to be hydrophilic and heat-resistant, and that might participate in anhydrobiosis; expression of at least one dur-1 transcript is upregulated in dauer larvae and other transcripts may be specifically expressed in dauer larvae.	177846	19	19	0	14.88	6.54	2.99e-11	2.84e-09	1	0.48	Y	N
204	Y6E2A.4	WBGene00012398	Y6E2A.4	Y6E2A.4	Y6E2A.4,Y6E2A.4:wp80,Y6E2A.4:wp188,Y6E2A.4	-3.41313	-0.349249	0.149274	1.8721	N.A.	N.A.	Microarray studies indicate that Y6E2A.4 is affected by Tunicamycin, Resveratrol, Quercetin, single-walled carbon nanotubes, adsorbable organic bromine compounds, and Sirolimus; tiling array and RNA sequencing studies indicate that Y6E2A.4 is enriched in the coelomocytes, Z4, Z1, gon_male_dtc posterior, gon_male_dtc anterior, Z1.p, Z4.a, and male-specific tissues and in the dopaminergic neurons.	189374	37	32	5	20.91	6.54	2.99e-11	2.83e-09	0.87	0.27	Y	N
205	cal-5	WBGene00006861	cal-5	C24H10.5	C24H10.5,C24H10.5	8.97541	5.13155	5.56461	4.36641	N.A.	adult hermaphrodite Ce,L1 larva Ce,L2 larva Ce,L3 larva Ce,L4 larva Ce	uvt-2 encodes a protein that contains four EF-hand calcium binding motifs with similarity to human calmodulin; mRNA weakly expressed in L1 through L4 larval stages and in the adult hermaphrodite.	192083	45	37	8	23.06	6.53	3.29e-11	3.09e-09	0.36	1.19	Y	N
206	C52A10.2	WBGene00016863	C52A10.2	C52A10.2	C52A10.2,C52A10.2	-3.53994	-0.975029	-3.75909	-3.89282	N.A.	N.A.	RNA sequencing and microarray studies indicate that C52A10.2 is affected by Ethanol, Tryptophan, Mianserin, Bisphenol A, Bisphenol S, Fluoranthene, Chlorpyrifos, Diazinon, R24, single-walled carbon nanotubes, Colistin, Allantoin, and Sirolimus; tiling array studies indicate that C52A10.2 is enriched in the intestine.	178910	38	35	3	21.15	6.53	3.3e-11	3.09e-09	0.15	0.23	Y	N
207	grd-4	WBGene00001693	grd-4	T01B10.1	T01B10.1,T01B10.1	1.51608	-1.50842	-1.05626	-3.64775	N.A.	N.A.	grd-4 encodes a hedgehog-like protein, with an N-terminal signal sequence and a C-terminal Ground domain; the Ground domain is predicted to form a cysteine-crosslinked protein involved in intercellular signalling, and it has subtle similarity to the N-terminal Hedge domain of HEDGEHOG proteins; GRD-4 is weakly required for normal molting; GRD-4 is also required for normal adult alae formation, gr…	24104827	38	31	7	21.14	6.53	3.34e-11	3.12e-09	2.12	0.26	N	N
208	hsp-12.3	WBGene00002012	hsp-12.3	F38E11.1	F38E11.1,F38E11.1	0.765555	3.32244	6.70032	3.25723	N.A.	N.A.	hsp-12.3 encodes a small heat-shock protein that forms heterotetramers with HSP-12.2 and has no chaperone-like activity; structurally, HSP-12.3 is mostly a beta-sheet; at least one HSP-12 (which may or may not be HSP-12.2) is ubiquitously expressed in L1 larvae, and later expressed in adult spermatids (and perhaps spermatocytes), and some adult vulval cells; hsp-12.3 is upregulated in daf-2 mutan…	177777	46	34	12	23.28	6.52	3.59e-11	3.33e-09	2.26	0.93	Y	N
209	Y20C6A.1	WBGene00012491	Y20C6A.1	Y20C6A.1	Y20C6A.1a,Y20C6A.1b,Y20C6A.1:wp92,Y20C6A.1:wp128,Y20C6A.1a,Y20C6A.1b	-0.440401	0.327921	-5.30369	-4.3132	N.A.	N.A.	This gene encodes a protein containing an F-box, a motif predicted to mediate protein-protein interactions either with homologs of yeast Skp-1p or with other proteins; this gene's encoded protein also contains an FTH/DUF38 motif, which may also mediate protein-protein interaction.	180151	42	34	8	22.2	6.51	3.68e-11	3.39e-09	1	2	N	Y
210	F59B10.5	WBGene00010321	F59B10.5	F59B10.5	F59B10.5,F59B10.5	3.4709	3.99082	1.90072	2.11671	N.A.	N.A.	Microarray, tiling array, and RNA sequencing studies indicate that F59B10.5 is affected by cyc-1, lin-15B, daf-12, daf-16, nhr-114, bar-1, tdp-1, daf-2, jmjd-3.1, lin-14, lin-4, ain-2, alg-1, mir-243, ash-2, aak-2, tax-6, nhr-23, and pmk-1; microarray and RNA sequencing studies indicate that F59B10.5 is affected by Heme, D-glucose, Atrazine, Fluoranthene, Chlorpyrifos, Diazinon, Microcystin-LR, D…	186599	31	27	4	18.95	6.49	4.22e-11	3.87e-09	0.72	0.13	Y	N
211	mai-1	WBGene00003124	mai-1	K10B3.9	K10B3.9,K10B3.9.1,K10B3.9.2	5.66745	3.58591	4.78719	5.34195	N.A.	N.A.	mai-1 is homologous to mitochondrial intrinsic ATPase inhibitor protein (IF(1)), which blocks reverse action (ATP hydrolysis) by F(0)F(1)-ATPase when its (normally required) proton gradient is lost; MAI-1 lacks an obvious mitochondrial import signal at its N-terminus, and is not transported to yeast mitochondria; MAI-1 may be cytosolic in vivo, regulating cytosolic ATPase(s); MAI-1 can inhibit ye…	3565232	34	31	3	19.78	6.46	5.07e-11	4.64e-09	0.4	0.89	N	N
212	T10G3.1	WBGene00011692	T10G3.1	T10G3.1	T10G3.1,T10G3.1:wp80,T10G3.1	-0.585835	2.69134	3.54095	1.32189	N.A.	N.A.	T10G3.1 is involved in embryo development.	188388	42	38	4	22.04	6.46	5.12e-11	4.66e-09	0.41	0.25	N	N
213	fkh-9	WBGene00001441	fkh-9	K03C7.2	K03C7.2a,K03C7.2b,K03C7.2c,K03C7.2a,K03C7.2c.1,K03C7.2c.2,K03C7.2b	6.26753	5.66656	5.27306	6.71289	anterior hypodermis,body wall musculature,dorsal nerve cord,head,head neuron,hypodermis,intestine,lateral nerve cord,mechanosensory neuron,neuron,pharyngeal-intestinal valve,pharynx,rectal muscle,tail,tail neuron,ventral nerve cord,virL,virR,vulva	1.5-fold embryo Ce,2-fold embryo Ce,3-fold embryo Ce,adult Ce,all stages Ce,comma embryo Ce,L1 larva Ce,L2 larva Ce,L3 larva Ce,L4 larva Ce,larva Ce	fkh-9 encodes a member of the forkhead domain transcription factor family.	180670	38	32	6	20.86	6.44	5.99e-11	5.42e-09	1.08	0.45	N	N
214	C32D5.1	WBGene00016310	C32D5.1	C32D5.1	C32D5.1,C32D5.1:wp104,C32D5.1	4.02078	1.77212	2.85917	2.19762	N.A.	N.A.	Tiling array, microarray, and RNA sequencing studies indicate that C32D5.1 is affected by daf-16, hpl-2, clk-1, daf-2, let-418, chd-3, dpy-21, alg-1, mir-35, nuo-6, lin-35, and eat-2; RNA sequencing and microarray studies indicate that C32D5.1 is affected by Rotenone, Chlorpyrifos, Diazinon, and Sirolimus.	174049	40	33	7	21.37	6.43	6.55e-11	5.9e-09	1.01	0.12	Y	N
215	T23F2.3	WBGene00020736	T23F2.3	T23F2.3	T23F2.3,T23F2.3	5.94251	7.12852	7.59289	7.20536	N.A.	N.A.	Microarray and RNA sequencing studies indicate that T23F2.3 is affected by Aldicarb, Rotenone, D-glucose, Cry5B, Humic substances, and Sirolimus; microarray, tiling array, and RNA sequencing studies indicate that T23F2.3 is enriched in the germ line, HOB, CEM, muscle cell, and intestine and in neurons including the PVD, OLL, dopaminergic, IL2, ray type B, and ASER neurons.	188805	37	34	3	20.51	6.42	6.97e-11	6.25e-09	0.42	0	N	N
216	gpx-6	WBGene00020373	gpx-6	T09A12.2	T09A12.2b,T09A12.2a:wp241,T09A12.2a,T09A12.2b	0.50628	0.497068	-0.0129991	1.02324	amphid neuron,body wall musculature,head neuron,nervous system,phasmid neuron,tail neuron	adult Ce,larva Ce	gpx-6 is an ortholog of human GPX4 (glutathione peroxidase 4); gpx-6 is predicted to have glutathione peroxidase activity, based on protein domain information; gpx-6 is expressed in the nervous system and the body wall musculature.	188313	45	38	7	22.65	6.41	7.31e-11	6.53e-09	1.36	0.76	Y	N
217	fbxa-69	WBGene00010018	fbxa-69	F54B8.3	F54B8.3,F54B8.3	4.47724	0.795749	-0.104734	0.257437	N.A.	N.A.	This gene encodes a protein containing an F-box, a motif predicted to mediate protein-protein interactions either with homologs of yeast Skp-1p or with other proteins; this gene's encoded protein also contains an FTH/DUF38 motif, which may also mediate protein-protein interaction.	180060	40	34	6	21.29	6.4	7.74e-11	6.88e-09	0.76	0.73	Y	N
219	H06A10.1	WBGene00010368	H06A10.1	H06A10.1	H06A10.1,H06A10.1	5.21327	1.48006	0.465811	-0.563735	N.A.	N.A.	H06A10.1 is an ortholog of human THBD (thrombomodulin); microarray and RNA sequencing studies indicate that H06A10.1 is affected by Methylmercuric chloride, Rotenone, Manganese chloride, D-glucose, Testosterone, Cadmium, Humic substances, single-walled carbon nanotubes, Dafa#1, and Ag nanoparticles; tiling array and RNA sequencing studies indicate that H06A10.1 is enriched in the cephalic sheath …	186696	34	30	4	19.49	6.37	9.67e-11	8.52e-09	1.05	0.27	N	N
220	acs-21	WBGene00016849	acs-21	C50H11.1	C50H11.1,C50H11.1	0.882986	2.11053	2.05932	3.09778	N.A.	N.A.	acs-21 is an ortholog of human ACSF3 (acyl-CoA synthetase family member 3); acs-21 is predicted to have catalytic activity, based on protein domain information.	178751	42	38	4	21.69	6.36	1.02e-10	8.91e-09	1.7	0.61	Y	N
221	C39D10.8	WBGene00016535	C39D10.8	C39D10.8	C39D10.8a,C39D10.8b,C39D10.8c,C39D10.8b,C39D10.8c,C39D10.8a	7.90455	2.7146	3.87439	1.8953	N.A.	N.A.	Microarray and RNA sequencing studies indicate that C39D10.8 is affected by clk-1, cyc-1, daf-2, glp-1, ham-3, cco-1, jmjd-3.1, jmjd-1.2, dop-1, rbr-2, dpy-21, daf-12, daf-16, sir-2.1, lin-14, lin-4, ain-1, and ain-2; RNA sequencing and microarray studies indicate that C39D10.8 is affected by Ethanol, Manganese chloride, D-glucose, Resveratrol, and Chlorpyrifos; microarray, tiling array, and RNA …	181046	44	36	8	22.2	6.35	1.05e-10	9.17e-09	0.79	2.61	N	N
222	maa-1	WBGene00007680	maa-1	C18D11.2	C18D11.2,C18D11.2	5.54351	2.79319	0.0989241	0.935596	hypodermis,intestine	N.A.	maa-1 encodes a novel, transmembrane acyl-CoA-binding protein; maa-1 activity, together with that of rme-1, is required for normal rates of endosomal recycling and for proper endosomal shape and morphology; a rescuing MAA-1::GFP fusion protein is expressed in the hypodermis (excluding the seam cells) and the intestine, as well as in an area near the dorsal and ventral nerve cords; within the hypo…	176612	46	38	8	22.71	6.35	1.05e-10	9.14e-09	0.46	2.45	Y	Y
223	T22B7.7	WBGene00020674	T22B7.7	T22B7.7	T22B7.7,T22B7.7	2.78411	1.2954	2.94129	1.4445	N.A.	N.A.	T22B7.7 is an ortholog of human ACOT9 (acyl-CoA thioesterase 9); RNA sequencing studies indicate that T22B7.7 is enriched in the germ line.	180832	44	34	10	22.14	6.34	1.17e-10	1.01e-08	0.87	0.13	Y	Y
224	W08A12.4	WBGene00021081	pals-33	W08A12.4	W08A12.4,W08A12.4:wp220,W08A12.4:wp247,W08A12.4	-3.41939	0.691745	-3.41462	-3.30765	N.A.	N.A.	pals-33 is an ortholog of human ALS2CR12 (amyotrophic lateral sclerosis 2 chromosome region candidate 12); microarray and RNA sequencing studies indicate that pals-33 is affected by Tryptophan, Mercuric Chloride, Multi-walled carbon nanotubes, D-glucose, Resveratrol, single-walled carbon nanotubes, and Sirolimus; tiling array and microarray studies indicate that pals-33 is enriched in the body wa…	189288	30	28	2	18.19	6.33	1.21e-10	1.04e-08	0.47	0.29	N	N
225	zig-9	WBGene00022474	zig-9	Y119C1B.9	Y119C1B.9,Y119C1B.9:wp155,Y119C1B.9:wp205,Y119C1B.9	1.73429	3.02457	-0.694009	-1.71513	N.A.	N.A.	Microarray and RNA sequencing studies indicate that zig-9 is affected by Diallyl trisulfide and Mianserin; tiling array and RNA sequencing studies indicate that zig-9 is enriched in the intestine and germ line.	191030	22	20	2	15.52	6.33	1.23e-10	1.05e-08	0.7	1.13	Y	N
226	R07E3.4	WBGene00011105	R07E3.4	R07E3.4	R07E3.4,R07E3.4	4.45125	4.3438	4.03574	1.46737	N.A.	N.A.	R07E3.4 is an ortholog of human SLC25A31 (solute carrier family 25 member 31); R07E3.4 is predicted to have transporter activity, based on protein domain information.	187678	36	30	6	19.95	6.33	1.23e-10	1.05e-08	0	0.91	Y	Y
227	ttr-41	WBGene00017374	ttr-41	F10G7.11	F10G7.11,F10G7.11	4.544	6.82162	7.62824	2.30059	N.A.	N.A.	RNA sequencing and microarray studies indicate that ttr-41 is affected by Rotenone, Mianserin, D-glucose, Deoxyglucose, and Paraquat; tiling array, RNA sequencing, and microarray studies indicate that ttr-41 is enriched in the intestine, germ line, and muscle cell.	24104420	22	21	1	15.5	6.32	1.28e-10	1.09e-08	0.77	0.28	N	N
228	Y15E3A.5	WBGene00012444	Y15E3A.5	Y15E3A.5	Y15E3A.5,Y15E3A.5	5.44195	5.45444	5.51733	6.85598	N.A.	N.A.	Microarray, tiling array, and RNA sequencing studies indicate that Y15E3A.5 is affected by cyc-1, sma-2, daf-12, nhr-114, wdr-23, eat-2, tatn-1, hlh-30, prg-1, clk-1, daf-2, daf-16, jmjd-3.1, jmjd-1.2, mir-60, dpy-21, ain-2, mir-243, alg-1, and nhr-25; RNA sequencing and microarray studies indicate that Y15E3A.5 is affected by Rotenone, Chlorpyrifos, and Colistin; tiling array, RNA sequencing, an…	181624	28	25	3	17.51	6.32	1.35e-10	1.14e-08	1.44	1	N	N
229	srp-3	WBGene00005644	srp-3	Y32G9A.4	Y32G9A.4,Y32G9A.4	0.383453	1.87522	3.77021	-1.08311	body wall musculature,intestine,muscle cell	adult Ce,L1 larva Ce,L2 larva Ce,L3 larva Ce,L4 larva Ce	srp-3 encodes a functional serpin (serine protease inhibitor)	178672	21	21	0	15.09	6.3	1.46e-10	1.23e-08	0.66	0	N	N
230	W02C12.2	WBGene00020929	W02C12.2	W02C12.2	W02C12.2a,W02C12.2b,W02C12.2:wp183,W02C12.2a,W02C12.2b	2.10204	3.01919	3.54273	7.26817	N.A.	N.A.	Microarray and RNA sequencing studies indicate that W02C12.2 is affected by clk-1, mab-5, wrn-1, daf-2, dcr-1, ain-1, mir-35, ain-2, tbx-2, isp-1, and nuo-6; microarray and RNA sequencing studies indicate that W02C12.2 is affected by Diallyl trisulfide, Rotenone, D-glucose, Diazinon, Humic substances, Paraquat, and Sirolimus; microarray, tiling array, and RNA sequencing studies indicate that W02C…	177155	24	21	3	16.15	6.3	1.47e-10	1.23e-08	0.79	0	N	N
231	lips-15	WBGene00012585	lips-15	Y38E10A.7	Y38E10A.7,Y38E10A.7	4.75184	2.88417	2.41805	1.06519	N.A.	N.A.	lips-15 is predicted to have hydrolase activity, based on protein domain information.	174895	40	35	5	20.94	6.29	1.57e-10	1.31e-08	0	0	N	N
233	K07C11.4	WBGene00019477	K07C11.4	K07C11.4	K07C11.4,K07C11.4	0.975151	2.65654	1.04227	0.44169	gonad,intestine,pharynx,somatic gonad	adult Ce,embryo Ce,L1 larva Ce,L2 larva Ce,L3 larva Ce,L4 larva Ce	K07C11.4 is expressed in the pharynx, gonad, and the intestine.	179198	46	39	7	22.41	6.27	1.82e-10	1.51e-08	1.73	0.57	Y	N
235	ttr-47	WBGene00019203	ttr-47	H14N18.3	H14N18.3,H14N18.3	5.27305	6.26444	8.3429	3.30114	N.A.	N.A.	ttr-47 is involved in locomotion.	179270	43	34	9	21.58	6.25	2.08e-10	1.7e-08	0.98	1.25	Y	Y
236	mdh-1	WBGene00018491	mdh-1	F46E10.10	F46E10.10a,F46E10.10b,F46E10.10c,F46E10.10b,F46E10.10c,F46E10.10a	10.1891	8.61474	9.71758	8.45932	N.A.	dauer larva Ce	mdh-1 encodes a malate dehydrogenase; by homology, MDH-1 is predicted to function to reversibly catalyze the formation of oxaloacetate from malate.	179041	45	43	2	22.09	6.25	2.09e-10	1.71e-08	1.13	1.45	Y	Y
237	dhs-2	WBGene00000966	dhs-2	F55A12.4	F55A12.4a,F55A12.4b,F55A12.4c,F55A12.4b:wp252,F55A12.4a,F55A12.4c.1,F55A12.4c.2,F55A12.4b	-2.05872	2.60005	-0.59657	-1.32841	N.A.	N.A.	dhs-2 encodes a short-chain dehydrogenase predicted to be mitochondrial.	172183	45	35	10	22.08	6.25	2.1e-10	1.71e-08	0.29	0.46	Y	Y
238	Y53G8B.1	WBGene00021817	Y53G8B.1	Y53G8B.1	Y53G8B.1,Y53G8B.1	5.39192	2.75242	2.65022	2.99293	N.A.	N.A.	Y53G8B.1 is an ortholog of human GstZ1 (glutathione S-transferase zeta 1); Y53G8B.1 is predicted to have catalytic activity, based on protein domain information.	190243	41	31	10	21.05	6.25	2.11e-10	1.71e-08	0.91	3.54	Y	N
239	clec-52	WBGene00015052	clec-52	B0218.8	B0218.8,B0218.8	-0.840831	2.72135	-1.92273	-0.505555	head neuron,intestine,nervous system,pharynx	adult Ce,larva Ce	clec-52 is an ortholog of members of the human COLEC (Collectins) family including COLEC11; clec-52 is involved in defense response to Gram-positive bacterium; clec-52 is expressed in the pharynx, nervous system, and the intestine.	181855	42	35	7	21.22	6.22	2.52e-10	2.03e-08	0.82	1.58	N	Y
240	sqrd-1	WBGene00008538	sqrd-1	F02H6.5	F02H6.5a,F02H6.5b,F02H6.5c,F02H6.5d,F02H6.5e,F02H6.5f,F02H6.5b,F02H6.5a,F02H6.5f,F02H6.5c,F02H6.5e,F02H6.5d	4.94471	3.28352	4.04588	0.379665	N.A.	N.A.	sqrd-1 is an ortholog of human SQRDL (sulfide quinone reductase-like (yeast)) and RP11-96O20.4; sqrd-1 is predicted to have oxidoreductase activity, based on protein domain information.	178374	46	35	11	22.22	6.21	2.6e-10	2.09e-08	0.46	1.06	Y	Y
241	akt-2	WBGene00000103	akt-2	F28H6.1	F28H6.1a,F28H6.1b,F28H6.1b,F28H6.1a	3.82988	3.5054	3.81742	4.68712	excretory canal,head neuron,hypodermis,intestine,isthmus,motor neuron,pharyngeal muscle cell,pharyngeal neuron,pharynx,rectal epithelium,rectal gland cell,rectum,spermatheca,tail neuron,touch receptor neuron,vulva	fully-elongated embryo Ce,postembryonic Ce	akt-2 encodes a homolog of the serine/threonine kinase Akt/PKB, AKT-2, that is required for progression through the dauer stage of development and for the negative regulation of adult lifespan; inactivation of akt-2 causes animals to arrest constitutively at the dauer stage, while having an increased life span; widely expressed, AKT-2 is activated by the phospholipid products of phosphoinositide …	181524	45	37	8	21.95	6.21	2.71e-10	2.17e-08	0.33	0.53	N	Y
242	zmp-3	WBGene00016283	zmp-3	C31B8.8	C31B8.8,C31B8.8	2.86874	1.15616	-0.932539	-1.66671	N.A.	N.A.	zmp-3 is an ortholog of human Mmp1 (matrix metallopeptidase 1) and members of the MMP (M10 matrix metallopeptidases) family including MMP13; zmp-3 is predicted to have metalloendopeptidase activity and zinc ion binding activity, based on protein domain information.	178748	40	36	4	20.65	6.2	2.75e-10	2.19e-08	1.12	0.25	Y	N
244	C39E9.8	WBGene00008032	C39E9.8	C39E9.8	C39E9.8a,C39E9.8b,C39E9.8c,C39E9.8d,C39E9.8e,C39E9.8f,C39E9.8g,C39E9.8:wp52,C39E9.8c,C39E9.8b,C39E9.8a,C39E9.8e.1,C39E9.8e.2,C39E9.8d.1,C39E9.8d.2,C39E9.8f,C39E9.8g	6.27933	4.67347	3.50034	3.78103	N.A.	N.A.	RNA sequencing and microarray studies indicate that C39E9.8 is affected by 1-methylnicotinamide, D-glucose, Cry5B, Ethanol, Chlorpyrifos, Diazinon, Quercetin, Hydrolyzable Tannins, Humic substances, R24, Colistin, and Sirolimus; tiling array, RNA sequencing, and microarray studies indicate that C39E9.8 is enriched in the germline precursor cell, hypodermis, germ line, and intestine.	178255	44	36	8	21.67	6.2	2.86e-10	2.26e-08	0	0	Y	N
245	F53B3.6	WBGene00018744	F53B3.6	F53B3.6	F53B3.6,F53B3.6	6.75367	3.70636	2.26346	1.30329	N.A.	N.A.	RNA sequencing and microarray studies indicate that F53B3.6 is affected by 1-methylnicotinamide, Nicotinic acid, D-glucose, Chlorpyrifos, Diazinon, Colistin, adsorbable organic bromine compounds, and Sirolimus; microarray, tiling array, and RNA sequencing studies indicate that F53B3.6 is enriched in the germline precursor cell, hypodermis, and germ line and in the PVD, OLL, and PLM neurons.	180576	30	25	5	17.78	6.19	3.08e-10	2.42e-08	0.18	0	Y	N
247	F09B12.3	WBGene00008607	F09B12.3	F09B12.3	F09B12.3,F09B12.3:wp83,F09B12.3	3.01733	5.8448	-0.421478	0.55281	N.A.	N.A.	F09B12.3 is an ortholog of human PLBD1 (phospholipase B domain containing 1) and PLBD2 (phospholipase B domain containing 2); RNA sequencing and microarray studies indicate that F09B12.3 is affected by 1-methylnicotinamide, Nicotinic acid, Mianserin, D-glucopyranose, Cholestanol, Cry5B, Quercetin, Humic substances, R24, and Sirolimus; tiling array, RNA sequencing, and microarray studies indicate …	181605	46	38	8	22.11	6.18	3.17e-10	2.48e-08	0	1	N	Y
248	dhs-9	WBGene00000973	dhs-9	Y32H12A.3	Y32H12A.3,Y32H12A.3	2.04161	5.73417	3.48123	3.46146	head,head neuron,intestine,nerve ring,nervous system,rectal gland cell,tail neuron	adult Ce,larva Ce	dhs-9 encodes a member of the short-chain dehydrogenases/reductases family (SDR).	175737	41	31	10	20.83	6.18	3.26e-10	2.53e-08	1.91	1.73	Y	Y
249	F25E5.8	WBGene00017789	F25E5.8	F25E5.8	F25E5.8a,F25E5.8b,F25E5.8b.1,F25E5.8b.2,F25E5.8a.1,F25E5.8a.2	7.64334	3.04632	3.26528	2.66942	N.A.	N.A.	Microarray and RNA sequencing studies indicate that F25E5.8 is affected by Diallyl trisulfide, Ethanol, Methylmercuric chloride, Rotenone, D-glucose, Chlorpyrifos, Diazinon, Cry5B, Humic substances, and Sirolimus; microarray, tiling array, and RNA sequencing studies indicate that F25E5.8 is enriched in the hypodermis and intestine and in the PVD, OLL, AVA, and PLM neurons.	184927	46	39	7	22.06	6.17	3.46e-10	2.68e-08	0.15	0.23	Y	N
250	arrd-11	WBGene00011052	arrd-11	R06B9.1	R06B9.1,R06B9.1:wp111,R06B9.1	-3.87303	-1.48066	-6.38781	-2.6829	N.A.	N.A.	arrd-11 is an ortholog of human ARRDC1 (arrestin domain containing 1) and ARRDC2 (arrestin domain containing 2); microarray and RNA sequencing studies indicate that arrd-11 is affected by age-1, lin-15B, nhr-114, daf-2, rsks-1, wrn-1, htz-1, lin-35, glp-1, daf-16, swsn-2.2, hsf-1, mir-60, dpy-21, mut-2, alg-1, spg-7, and pmk-1; microarray and RNA sequencing studies indicate that arrd-11 is affect…	187635	41	33	8	20.8	6.17	3.47e-10	2.68e-08	1.28	1.26	Y	N
251	Y95B8A.6	WBGene00022386	Y95B8A.6	Y95B8A.6	Y95B8A.6a,Y95B8A.6b,Y95B8A.6c,Y95B8A.6d,Y95B8A.6c,Y95B8A.6d,Y95B8A.6a.1,Y95B8A.6a.2,Y95B8A.6b.1,Y95B8A.6b.2	5.72901	0.997822	2.44497	1.96246	N.A.	N.A.	RNA sequencing and microarray studies indicate that Y95B8A.6 is affected by Rotenone, Tunicamycin, Progesterone, Chlorpyrifos, Diazinon, Quercetin, R24, Sirolimus, and Allantoin; tiling array, RNA sequencing, and microarray studies indicate that Y95B8A.6 is enriched in the hypodermis, germ line, and muscle cell and in neurons.	171674	38	32	6	19.92	6.14	4.09e-10	3.14e-08	0.5	0.58	N	N
252	C23G10.6	WBGene00016013	C23G10.6	C23G10.6	C23G10.6,C23G10.6:wp165,C23G10.6:wp214,C23G10.6	0.71703	1.66871	-3.19286	-1.88009	N.A.	N.A.	C23G10.6 is an ortholog of human UGT3A2 (UDP glycosyltransferase family 3 member A2) and UGT3A1 (UDP glycosyltransferase family 3 member A1); C23G10.6 is predicted to have transferase activity, transferring hexosyl groups, based on protein domain information.	182814	46	35	11	21.92	6.13	4.46e-10	3.41e-08	0	1.12	Y	N
253	nex-1	WBGene00003588	nex-1	ZC155.1	ZC155.1,ZC155.1.1,ZC155.1.2	9.15917	8.66128	8.89364	7.77822	hypodermis,pharynx,spermathecal-uterine junction,uterine toroidal epithelial cell,vulva	adult Ce,embryo Ce,L1 larva Ce,L2 larva Ce,L3 larva Ce,L4 larva Ce	nex-1 encodes an annexin, a member of a family of calcium-dependent phospholipid binding proteins; NEX-1 is required for efficient engulfment of apoptotic cell corpses in the pharynx, and may also function in other membrane fusion events, such as exocytosis; NEX-1 in vitro can bind phosphatidylserine, phosphatidylinositol, heparin, heparan sulfate, and chondroitin sulfate; NEX-1 is expressed in t…	175714	38	32	6	19.85	6.12	4.72e-10	3.6e-08	3.13	1.13	Y	Y
254	rnh-1.3	WBGene00007303	rnh-1.3	C04F12.9	C04F12.9,C04F12.9.1,C04F12.9.2	0.737303	5.03527	7.07735	0.330668	N.A.	N.A.	rnh-1.3 is one of four C. elegans genes that can encode an RNase H ribonuclease; rnh-1.3 transcripts are expressed from the L3 larval stage through adulthood.	182229	37	27	10	19.57	6.12	4.78e-10	3.63e-08	0.88	0.13	Y	N
255	Y39B6A.5	WBGene00012668	Y39B6A.5	Y39B6A.5	Y39B6A.5a,Y39B6A.5b,Y39B6A.5a,Y39B6A.5b	4.18981	6.64333	6.54165	4.06211	N.A.	N.A.	RNA sequencing, microarray, and tiling array studies indicate that Y39B6A.5 is affected by aak-2, lin-15B, hpl-2, hlh-30, clk-1, wrn-1, htz-1, daf-2, npr-1, cco-1, jmjd-3.1, lin-28, dpy-21, sir-2.1, tdp-1, alg-1, ain-2, and tbx-2; RNA sequencing and microarray studies indicate that Y39B6A.5 is affected by Rotenone, Ethanol, Cry5B, Humic substances, and Sirolimus; tiling array, RNA sequencing, and…	180260	44	36	8	21.36	6.11	5.05e-10	3.82e-08	1.02	1.29	Y	Y
257	F15G9.1	WBGene00008865	F15G9.1	F15G9.1	F15G9.1a,F15G9.1b,F15G9.1c,F15G9.1a,F15G9.1c,F15G9.1b	5.2518	7.06064	5.92057	6.23345	hypodermis,muscle cell	larva Ce	F15G9.1 is expressed in the muscle cell and the hypodermis; F15G9.1 is localized to the striated muscle dense body and the striated muscle thin filament.	181184	45	38	7	21.5	6.08	6.18e-10	4.64e-08	0.33	0	Y	N
259	C24B5.4	WBGene00016046	C24B5.4	C24B5.4	C24B5.4,C24B5.4:wp133,C24B5.4	4.80057	0.723446	0.0363192	0.500622	body wall musculature,hypodermis	1.5-fold embryo Ce,2-fold embryo Ce,3-fold embryo Ce,comma embryo Ce,fully-elongated embryo Ce	C24B5.4 is an ortholog of human C11orf54 (chromosome 11 open reading frame 54); C24B5.4 is expressed in the body wall musculature.	182835	43	34	9	20.93	6.06	6.99e-10	5.21e-08	2.14	0.27	Y	N
261	daf-16	WBGene00000912	daf-16	R13H8.1	R13H8.1a,R13H8.1b,R13H8.1c,R13H8.1d,R13H8.1e,R13H8.1f,R13H8.1g,R13H8.1h,R13H8.1i,R13H8.1k,R13H8.1l,R13H8.1m,R13H8.1d:wp144,R13H8.1f:wp214,R13H8.1h,R13H8.1f,R13H8.1i,R13H8.1k,R13H8.1d,R13H8.1b.1,R13H8.1b.2,R13H8.1c.1,R13H8.1c.2,R13H8.1m,R13H8.1l,R13H8.1a,R13H8.1g,R13H8.1e	6.3847	4.56631	5.46156	6.0777	AIYL,AIYR,body wall musculature,Cell,germ line,gonad,gonadal sheath cell,gon_herm_dtc_A,gon_herm_dtc_P,head,head neuron,hypodermis,intestine,muscle cell,nerve ring neuron,neuron,pharynx,rectal gland cell,seam cell,tail neuron,ventral nerve cord,vulva,vulval muscle	1.5-fold embryo Ce,2-fold embryo Ce,3-fold embryo Ce,adult Ce,all stages Ce,comma embryo Ce,elongating embryo Ce,embryo Ce,fully-elongated embryo Ce,L1 larva Ce,L2 larva Ce,L3 larva Ce,L4 larva Ce,larva Ce,postembryonic Ce	daf-16 encodes the sole C. elegans forkhead box O (FOXO) homologue; DAF-16 functions as a transcription factor that acts in the insulin/IGF-1-mediated signaling (IIS) pathway that regulates dauer formation, longevity, fat metabolism, stress response, and innate immunity; DAF-16 regulates these various processes through isoform-specific expression, isoform-specific regulation by different AKT kina…	172981	43	35	8	20.87	6.04	7.84e-10	5.8e-08	1.12	1.23	Y	N
262	DH11.2	WBGene00008436	DH11.2	DH11.2	DH11.2,DH11.2:wp52,DH11.2.1,DH11.2.2	3.54176	2.89876	2.97178	0.507209	N.A.	N.A.	Microarray, tiling array, and RNA sequencing studies indicate that DH11.2 is affected by alg-1, zfp-1, rheb-1, isp-1, hlh-30, daf-16, daf-12, daf-2, mdt-15, npr-1, jmjd-3.1, jmjd-1.2, rbr-2, dpy-21, sir-2.1, crh-1, hcf-1, mir-35, and xpa-1; RNA sequencing and microarray studies indicate that DH11.2 is affected by 1-methylnicotinamide, Rotenone, D-glucopyranose, Sodium arsenite, Bisphenol S, Ethan…	174283	39	31	8	19.83	6.03	8.21e-10	6.04e-08	0.34	0.68	Y	Y
265	nspa-4	WBGene00044272	nspa-4	H12D21.13	H12D21.13,H12D21.13.1,H12D21.13.2	-0.345094	1.83741	0.322366	-2.48575	N.A.	N.A.	Microarray and RNA sequencing studies indicate that nspa-4 is affected by Hydrogen sulfide, Ethanol, Manganese chloride, D-glucopyranose, Sodium arsenite, Multi-walled carbon nanotubes, Cry5B, Quercetin, Hydrolyzable Tannins, Humic substances, Paraquat, Benzene, Colistin, Tyrosol, and Allantoin; RNA sequencing and microarray studies indicate that nspa-4 is enriched in the germ line and in neurons.	3564808	13	12	1	11.32	6.03	8.25e-10	6e-08	2.15	0.74	N	N
268	CC8.2	WBGene00016987	CC8.2	CC8.2	CC8.2a,CC8.2b,CC8.2a,CC8.2b	5.62396	3.46955	4.2967	2.94685	N.A.	N.A.	CC8.2 is an ortholog of human PPP1R3D (protein phosphatase 1 regulatory subunit 3D) and PPP1R3E (protein phosphatase 1 regulatory subunit 3E); RNA sequencing and microarray studies indicate that CC8.2 is affected by Rotenone, Atrazine, Chlorpyrifos, Diazinon, Humic substances, single-walled carbon nanotubes, Paraquat, Sirolimus, and Ag nanoparticles; RNA sequencing and microarray studies indicate…	177126	40	34	6	20.08	6.03	8.33e-10	6e-08	0.76	0.68	Y	N
269	lbp-6	WBGene00002258	lbp-6	W02D3.5	W02D3.5,W02D3.5	8.42087	8.25509	7.72122	3.79538	N.A.	N.A.	lbp-6 is an ortholog of members of the human FABP (Fatty acid binding protein) family including FABP12; lbp-6 is involved in determination of adult lifespan; lbp-6 is predicted to have lipid binding activity and transporter activity, based on protein domain information.	172390	45	41	4	21.31	6.02	8.63e-10	6.19e-08	0.33	0.66	Y	Y
270	F32A5.8	WBGene00017971	F32A5.8	F32A5.8	F32A5.8,F32A5.8:wp88,F32A5.8.1,F32A5.8.2	2.33134	4.38013	2.98589	2.0642	N.A.	N.A.	F32A5.8 is an ortholog of human Wwox (WW domain containing oxidoreductase); microarray, RNA sequencing, and proteomic studies indicate that F32A5.8 is affected by nhr-8, eat-2, emr-1, lem-2, daf-2, jmjd-3.1, jmjd-1.2, glp-1, daf-16, dpy-9, dpy-10, tbx-2, isp-1, and nuo-6; RNA sequencing and microarray studies indicate that F32A5.8 is affected by Rotenone, Cry5B, Hydrolyzable Tannins, Humic substa…	353400	22	21	1	14.74	6.01	9.44e-10	6.74e-08	0.15	0.23	N	N
271	T04G9.7	WBGene00020218	T04G9.7	T04G9.7	T04G9.7,T04G9.7	5.48818	4.46841	10.8985	4.22399	N.A.	N.A.	T04G9.7 is involved in embryo development.	180424	21	21	0	14.36	5.99	1.05e-09	7.46e-08	0.36	0.59	N	N
272	Y53G8B.2	WBGene00021818	Y53G8B.2	Y53G8B.2	Y53G8B.2,Y53G8B.2	1.77724	3.47643	1.85781	0.254258	N.A.	N.A.	Y53G8B.2 is an ortholog of human DGAT2 (diacylglycerol O-acyltransferase 2), MOGAT1 (monoacylglycerol O-acyltransferase 1) and MOGAT2 (monoacylglycerol O-acyltransferase 2); Y53G8B.2 is predicted to have transferase activity, transferring acyl groups other than amino-acyl groups, based on protein domain information.	175417	41	38	3	20.2	5.99	1.07e-09	7.55e-08	0.29	0	N	N
273	gln-3	WBGene00001604	gln-3	Y105C5B.28	Y105C5B.28a,Y105C5B.28b,Y105C5B.28c,Y105C5B.28a,Y105C5B.28b,Y105C5B.28c.1,Y105C5B.28c.2,Y105C5B.28c.3	8.578	7.45798	6.86575	5.07084	N.A.	N.A.	gln-3 is an ortholog of human GLUL (glutamate-ammonia ligase); gln-3 is predicted to have glutamate-ammonia ligase activity, based on protein domain information.	178452	22	18	4	14.69	5.98	1.09e-09	7.73e-08	0.4	0.45	Y	N
274	ptr-20	WBGene00004234	ptr-20	Y53F4B.28	Y53F4B.28,Y53F4B.28	4.57065	2.33321	0.478173	1.49858	N.A.	N.A.	ptr-20 encodes a nematode-specific member of the sterol sensing domain (SSD) proteins, distantly paralogous to Drosophila PATCHED (PTC) and human PTCH (OMIM:601309, mutated in basal cell nevus syndrome); PTR-20 is weakly required for normal molting from L3 to adult stages male tail development; PTR-20 is also required for normal adult alae formation, growth to full size, and locomotion.	175165	38	34	4	19.39	5.97	1.17e-09	8.21e-08	0.11	0.13	N	N
275	R05H10.1	WBGene00011042	R05H10.1	R05H10.1	R05H10.1,R05H10.1	6.49412	0.967086	-0.878616	-0.234452	N.A.	N.A.	RNA sequencing and microarray studies indicate that R05H10.1 is affected by Ethanol, Methylmercuric chloride, Mercuric Chloride, Sodium arsenite, D-glucose, Juglone, Cry5B, Diazinon, Quercetin, R24, and Dafa#1; tiling array and RNA sequencing studies indicate that R05H10.1 is enriched in the coelomocytes, hypodermis, and male.	175144	40	31	9	19.88	5.97	1.21e-09	8.52e-08	0.61	0.28	Y	N
276	C32D5.8	WBGene00016316	C32D5.8	C32D5.8	C32D5.8a,C32D5.8b,C32D5.8:wp130,C32D5.8a,C32D5.8b	8.05846	5.36903	6.83768	5.98099	N.A.	N.A.	C32D5.8 is an ortholog of human NXNL1 (nucleoredoxin-like 1), NXNL2 (nucleoredoxin-like 2) and NXN (nucleoredoxin); C32D5.8 is involved in embryo development and reproduction.	174048	44	38	6	20.87	5.97	1.22e-09	8.53e-08	0.49	0.27	N	N
277	got-2.2	WBGene00015778	got-2.2	C14F11.1	C14F11.1a,C14F11.1b,C14F11.1b.1,C14F11.1b.2,C14F11.1a.1,C14F11.1a.2	8.37643	6.73457	8.33017	6.43208	N.A.	N.A.	got-2.2 is an ortholog of human Got2 (glutamic-oxaloacetic transaminase 2); got-2.2 is predicted to have pyridoxal phosphate binding activity and transaminase activity, based on protein domain information.	180897	46	41	5	21.31	5.95	1.32e-09	9.17e-08	1.19	0.28	N	Y
278	fbxc-7	WBGene00016302	fbxc-7	C32B5.9	C32B5.9,C32B5.9:wp251,C32B5.9	-5.30044	-0.145656	-6.50363	-2.86101	N.A.	N.A.	Microarray and RNA sequencing studies indicate that fbxc-7 is affected by cyc-1, ets-4, bar-1, clk-1, daf-16, daf-2, daf-12, dpy-21, mir-243, and eat-2; microarray studies indicate that fbxc-7 is affected by Resveratrol, Cadmium, Diazinon, Dafa#1, and Sirolimus.	183113	26	24	2	15.9	5.95	1.34e-09	9.32e-08	0.45	0	N	N
280	Y48G1A.2	WBGene00021658	Y48G1A.2	Y48G1A.2	Y48G1A.2,Y48G1A.2	2.89657	1.66693	1.84635	-0.845453	N.A.	N.A.	Microarray and RNA sequencing studies indicate that Y48G1A.2 is affected by Hydrogen sulfide, Methylmercury hydroxide, Rotenone, Atrazine, Hydrolyzable Tannins, Paraquat, and Sirolimus; RNA sequencing studies indicate that Y48G1A.2 is enriched in the germ line and in the AFD neurons.	171625	41	36	5	20.01	5.93	1.54e-09	1.06e-07	0.4	0.25	N	N
281	F23F1.7	WBGene00017748	F23F1.7	F23F1.7	F23F1.7,F23F1.7	4.62002	1.93732	1.32068	4.69345	N.A.	N.A.	Microarray, tiling array, RNA sequencing, and proteomic studies indicate that F23F1.7 is affected by cyc-1, rsr-2, pgrn-1, emr-1, lem-2, daf-2, let-418, chd-3, dpy-21, glp-1, daf-12, daf-16, sir-2.1, rde-4, dpy-10, osm-11, ash-2, and crh-1; RNA sequencing and microarray studies indicate that F23F1.7 is affected by Mianserin, Quercetin, Humic substances, and Sirolimus; tiling array and microarray …	184904	45	37	8	20.96	5.92	1.62e-09	1.11e-07	0.57	0.41	N	N
282	W05B10.4	WBGene00012279	W05B10.4	W05B10.4	W05B10.4,W05B10.4	1.9715	1.68095	1.75389	2.16205	pharynx,pm2,pm6,pm7,vulC,vulD,vulval cell	adult Ce,embryo Ce,L1 larva Ce,L2 larva Ce,L3 larva Ce,L4 larva Ce	W05B10.4 is expressed in the pharynx, vulval cell, vulC, and the vulD.	179736	38	30	8	19.2	5.91	1.68e-09	1.15e-07	0.34	1.14	N	N
283	mtch-1	WBGene00018395	mtch-1	F43E2.7	F43E2.7a,F43E2.7b,F43E2.7a:wp92,F43E2.7a:wp183,F43E2.7b:wp90,F43E2.7a,F43E2.7b	6.75942	6.1311	6.70278	6.81692	anal depressor muscle,body wall musculature,head neuron,mu_int_L,mu_int_R,nervous system,pharynx,rectal epithelium,tail neuron	adult Ce,larva Ce	mtch-1 is an ortholog of human MTCH1 (mitochondrial carrier 1) and MTCH2 (mitochondrial carrier 2); mtch-1 is involved in determination of adult lifespan, embryo development, lipid storage and nematode larval development; mtch-1 is expressed in the pharynx, mu_int_R, mu_int_L, anal depressor muscle, nervous system, rectal epithelium, and the body wall musculature.	174207	46	38	8	21.15	5.91	1.76e-09	1.2e-07	1.37	0.41	N	N
284	B0284.1	WBGene00007131	pals-26	B0284.1	B0284.1,B0284.1:wp168,B0284.1	0.397123	1.5745	0.593425	-1.49565	body wall musculature,coelomocyte,gonadal sheath cell,head neuron,hypodermis,intestine,nervous system,pharynx,rectal epithelium,rectal gland cell,reproductive system,spermatheca,vulva	adult Ce,larva Ce	pals-26 is an ortholog of human ALS2CR12 (amyotrophic lateral sclerosis 2 chromosome region candidate 12); pals-26 is involved in nematode larval development, positive regulation of growth and reproduction; pals-26 is expressed in the pharynx, hypodermis, nervous system, reproductive system, coelomocyte, intestine, rectal gland cell, and the body wall musculature.	181902	46	42	4	21.1	5.89	1.92e-09	1.3e-07	2.55	1.89	Y	N
287	ugt-14	WBGene00019233	ugt-14	H23N18.2	H23N18.2,H23N18.2	0.608716	-1.46637	-3.88946	-5.56097	N.A.	N.A.	ugt-14 is an ortholog of human UGT3A2 (UDP glycosyltransferase family 3 member A2) and UGT3A1 (UDP glycosyltransferase family 3 member A1); ugt-14 is predicted to have transferase activity, transferring hexosyl groups, based on protein domain information.	186767	39	35	4	19.35	5.88	2.06e-09	1.39e-07	0.15	1.12	Y	N
288	Y34F4.2	WBGene00021337	Y34F4.2	Y34F4.2	Y34F4.2a,Y34F4.2b,Y34F4.2:wp183,Y34F4.2a,Y34F4.2b	-2.79818	-0.066576	-4.28507	-1.11557	N.A.	N.A.	RNA sequencing and microarray studies indicate that Y34F4.2 is affected by 1-methylnicotinamide, Tunicamycin, Mianserin, D-glucose, Fluoranthene, Cry5B, Quercetin, Humic substances, single-walled carbon nanotubes, Paraquat, Colistin, and Sirolimus; tiling array and RNA sequencing studies indicate that Y34F4.2 is enriched in the dopaminergic, PVD, OLL, and ASER neurons.	175262	13	12	1	11.03	5.87	2.18e-09	1.46e-07	0	1	N	N
289	thn-1	WBGene00009213	thn-1	F28D1.3	F28D1.3,F28D1.3	-0.560316	-1.10421	-2.99526	-2.97111	N.A.	N.A.	thn-1 is involved in defense response to Gram-negative bacterium, determination of adult lifespan, innate immune response and reproduction.	185060	36	29	7	18.52	5.87	2.24e-09	1.5e-07	0.36	1	N	N
290	ctl-2	WBGene00000831	ctl-2	Y54G11A.5	Y54G11A.5,Y54G11A.5a:wp144,Y54G11A.5b:wp144,Y54G11A.5.1,Y54G11A.5.2	6.04183	5.26771	1.36948	0.945281	N.A.	all stages Ce	ctl-2 encodes one of three C. elegans catalases; CTL-2 exhibits catalase and peroxidase activity in vitro, and thus likely functions in vivo as an antioxidant enzyme that protects cells from reactive oxygen species; ctl-2 activity is required for normal lifespan as well as for the extended lifespan seen in daf-2 mutant animals; in addition, ctl-2 is required for normal egg-laying capacity and for…	175085	46	38	8	20.99	5.86	2.3e-09	1.53e-07	0.21	2.59	N	N
293	Y57G7A.1	WBGene00021965	Y57G7A.1	Y57G7A.1	Y57G7A.1,Y57G7A.1.1,Y57G7A.1.2	0.168025	3.24561	1.43424	1.41602	N.A.	N.A.	RNA sequencing and microarray studies indicate that Y57G7A.1 is affected by htz-1, daf-2, npr-1, rbr-2, daf-16, dcr-1, slr-2, dpy-9, dpy-10, crh-1, octr-1, xpa-1, tbx-2, and nuo-6; RNA sequencing and microarray studies indicate that Y57G7A.1 is affected by Rotenone, Mianserin, Cry5B, Humic substances, and Allantoin; tiling array, RNA sequencing, and microarray studies indicate that Y57G7A.1 is en…	190358	38	27	11	18.93	5.83	2.8e-09	1.84e-07	0.29	2.28	N	N
295	asp-13	WBGene00017881	asp-13	F28A12.4	F28A12.4,F28A12.4.1,F28A12.4.2	2.21951	3.95334	-1.72531	-0.686583	N.A.	N.A.	asp-13 is an ortholog of human CTSE (cathepsin E), pgc (progastricsin), PGA3 (pepsinogen 3, group I (pepsinogen A)) and PGA5 (pepsinogen 5, group I (pepsinogen A)); asp-13 is predicted to have aspartic-type endopeptidase activity, based on protein domain information.	179247	44	33	11	20.38	5.82	2.92e-09	1.91e-07	0.19	0.84	Y	Y
297	acbp-1	WBGene00016655	acbp-1	C44E4.6	C44E4.6,C44E4.6.1,C44E4.6.2,C44E4.6.3	7.09662	7.96029	6.7708	5.69063	N.A.	N.A.	acbp-1 encodes a highly conserved protein containing a functional acyl-CoA-binding binding domain orthologous to human DBI (Diazepam Binding inhibitor) (OMIM: 125950) required for protein stability and ligand binding; acyl-CoA proteins are required for lipid droplet morphology and lipid storage function; acbp-1 mutants have reduced triglycerides, aberrant lipid droplet morphology and number in th…	172071	45	39	6	20.58	5.81	3.15e-09	2.04e-07	0.26	2.19	Y	N
298	Y34F4.1	WBGene00021336	Y34F4.1	Y34F4.1	Y34F4.1a,Y34F4.1b,Y34F4.1:wp183,Y34F4.1b,Y34F4.1a	-1.62311	1.27863	-3.30037	-2.16152	N.A.	N.A.	Microarray and RNA sequencing studies indicate that Y34F4.1 is affected by clk-1, lin-15B, atfs-1, spg-7, eat-2, emr-1, lem-2, wrn-1, daf-2, lin-35, glp-1, hsf-1, rbr-2, mir-60, let-418, chd-3, dpy-21, spr-5, tdp-1, and nuo-6; RNA sequencing and microarray studies indicate that Y34F4.1 is affected by Rotenone, Tunicamycin, Mianserin, Humic substances, Colistin, and Sirolimus; tiling array and RNA…	189591	22	20	2	14.24	5.8	3.32e-09	2.15e-07	0.61	1.88	N	Y
299	aat-1	WBGene00000002	aat-1	F27C8.1	F27C8.1,F27C8.1.1,F27C8.1.2	0.921494	1.93964	1.88315	3.38168	excretory cell,excretory gland cell,gonadal sheath cell,head neuron,intestine,nerve ring,nervous system,Pharyngeal gland cell,pharyngeal neuron,pharynx,rectal gland cell,reproductive system,tail,ventral cord neuron	adult Ce,larva Ce	aat-1 encodes an amino acid transporter catalytic subunit; when co-expressed in Xenopus oocytes with the ATG-2 glycoprotein subunit, AAT-1 is able to facilitate amino acid uptake and exchange, showing a relatively high affinity for small and some large neutral amino acids; in addition, AAT-1 is able to covalently associate with ATG-2 or ATG-1 to form heterodimers in the Xenopus expression system;…	177793	33	26	7	17.52	5.8	3.37e-09	2.17e-07	0.62	1.27	N	N
300	C39D10.3	WBGene00016531	C39D10.3	C39D10.3	C39D10.3a,C39D10.3b,C39D10.3:wp115,C39D10.3:wp154,C39D10.3a:wp184,C39D10.3a,C39D10.3b	-0.602895	3.91345	5.85979	2.72262	body wall musculature	adult Ce,embryo Ce,L1 larva Ce,L2 larva Ce,L3 larva Ce,L4 larva Ce	C39D10.3 is an ortholog of human PCYT2 (phosphate cytidylyltransferase 2, ethanolamine); C39D10.3 is predicted to have catalytic activity, based on protein domain information; C39D10.3 is expressed in the body wall musculature.	181047	41	33	8	19.54	5.78	3.63e-09	2.33e-07	1.41	0.66	N	N
301	pcca-1	WBGene00017864	pcca-1	F27D9.5	F27D9.5,F27D9.5.1,F27D9.5.2	6.98175	7.52183	8.31129	7.01635	body wall musculature,head,intestine,nerve ring,nervous system,neuron	adult Ce,larva Ce	The F27D9.5 gene encodes an ortholog of the human gene PROPIONYL-COA CARBOXYLASE ALPHA SUBUNIT (PCCA), which when mutated leads to propionicaciduria, type I (OMIM:232000).	181026	46	40	6	20.69	5.77	3.86e-09	2.48e-07	0.46	0.91	Y	N
302	frm-4	WBGene00001491	frm-4	C24A11.8	C24A11.8a,C24A11.8b,C24A11.8c,C24A11.8a,C24A11.8b,C24A11.8c	4.98516	4.35231	5.58026	5.61435	body wall musculature,gon_herm_dtc_A,gon_herm_dtc_P,head,head neuron,hypodermis,intestine,mu_int_L,mu_int_R,nerve ring,nervous system,neuron,pharynx,PVDL,PVDR,reproductive system,seam cell,spermatheca,tail,tail neuron,vulva,vulval muscle	adult Ce,larva Ce	frm-4 encodes a predicted transmembrane protein that contains an N-terminal FERM (Band 4.1-ezrin-radixin-moesin) domain; by homology, FRM-4 is predicted to function as a membrane-cytoskeleton linker protein that plays a role in cell adhesion, migration, or organization of cell surface structures; however, as loss of frm-4 activity via large-scale RNAi screens does not result in any obvious abnorm…	172189	37	28	9	18.49	5.77	3.99e-09	2.55e-07	2.1	2.08	N	Y
303	mdl-1	WBGene00003163	mdl-1	R03E9.1	R03E9.1,R03E9.1	7.87676	6.06408	6.77875	7.77843	body wall musculature,CEPDR,CEPVR,dorsal nerve cord,head neuron,hypodermis,intestine,neuron,pharyngeal muscle cell,pharynx,tail,tail neuron,ventral cord neuron,ventral nerve cord,Z1,Z4	adult Ce,fully-elongated embryo Ce,L1 larva Ce,L2 larva Ce,L3 larva Ce,L4 larva Ce	mdl-1 encodes a basic helix-loop-helix (bHLH) protein similar to the vertebrate MAD transcriptional regulators; in vitro, MDL-1 can heterodimerize, and bind an E-box DNA sequence, with MXL-1, a C. elegans MAX-like bHLH protein; when expressed in rat embryonic fibroblasts, MDL-1 is able to suppress c-MYC/RAS-induced cell transformation, in a manner dependent upon an intact, predicted SIN3 interact…	180942	46	36	10	20.65	5.76	4.14e-09	2.64e-07	0	0	Y	Y
304	W02D9.10	WBGene00012216	W02D9.10	W02D9.10	W02D9.10,W02D9.10	7.22446	5.29908	5.77961	6.78336	N.A.	N.A.	Microarray and RNA sequencing studies indicate that W02D9.10 is affected by Lithium Chloride, Rotenone, D-glucose, Cry5B, Ethanol, Resveratrol, Humic substances, Colistin, and Sirolimus; tiling array, RNA sequencing, and microarray studies indicate that W02D9.10 is enriched in the germ line, muscle cell, and intestine and in neurons including the dopaminergic, AFD, PLM, and RID neurons.	173125	46	41	5	20.65	5.76	4.17e-09	2.64e-07	0.84	0.28	Y	Y
305	cex-1	WBGene00023407	cex-1	F56D1.6	F56D1.6,F56D1.6	3.81501	2.94371	8.18	4.34806	gonadal sheath cell,head neuron,intestine,nervous system,reproductive system,RIML,RIMR,tail neuron	adult Ce,larva Ce	cex-1 is an ortholog of human SDF4 (stromal cell derived factor 4); cex-1 is expressed in the nervous system, reproductive system, and the intestine.	186376	44	34	10	20.16	5.76	4.3e-09	2.72e-07	0.23	0.12	N	N
306	fip-6	WBGene00009964	fip-6	F53B6.9	F53B6.9,F53B6.9	0.654866	3.12506	1.10901	-1.71038	N.A.	N.A.	Microarray, tiling array, and RNA sequencing studies indicate that fip-6 is affected by cyc-1, lin-15B, hpl-2, nhr-114, emr-1, lem-2, hlh-30, prg-1, ubc-9, clk-1, wrn-1, daf-2, glp-1, jmjd-1.2, hsf-1, daf-12, daf-16, mir-243, alg-1, and nhr-25; RNA sequencing and microarray studies indicate that fip-6 is affected by Nitric Oxide, Methylmercury hydroxide, Rotenone, Tunicamycin, Juglone, and Colist…	172707	9	9	0	8.95	5.74	4.8e-09	3.02e-07	0.15	1.14	Y	N
307	scrm-1	WBGene00011935	scrm-1	T22H2.5	T22H2.5a,T22H2.5b,T22H2.5c,T22H2.5a:wp114,T22H2.5b:wp114,T22H2.5c,T22H2.5a.1,T22H2.5a.2,T22H2.5b	4.43805	4.1541	4.9454	5.59454	Cell,germ line	N.A.	scrm-1 encodes, by alternative splicing, two isoforms of a putative phospholipid scramblase required for phosphatidylserine exposure and the normally rapid engulfment of apoptotic cells in the germline; SCRM-1 is localized to plasma membranes of embryonic cells from early embryogenesis onward; SCRM-1 is specifically bound by residues 380-550 of WAH-1 in vitro, and WAH-1 binding is required in lip…	173053	37	29	8	18.38	5.73	4.92e-09	3.09e-07	0.5	0.41	N	N
308	col-183	WBGene00000756	col-183	F02D10.1	F02D10.1,F02D10.1	0.132107	-3.67683	-4.7553	-4.86281	N.A.	N.A.	col-183 is involved in body morphogenesis and positive regulation of growth; col-183 is a structural constituent of cuticle, based on protein domain information.	184081	45	32	13	20.31	5.73	4.98e-09	3.12e-07	0.68	0.58	N	N
309	ttr-7	WBGene00020566	ttr-7	T19C3.9	T19C3.9,T19C3.9	4.89378	1.47846	-1.04735	-0.13151	N.A.	N.A.	Microarray, tiling array, RNA sequencing, and proteomic studies indicate that ttr-7 is affected by age-1, hpl-2, nhr-62, eat-2, gld-1, let-7, tatn-1, blmp-1, bar-1, clk-1, daf-2, rbr-2, dpy-21, daf-12, daf-16, and alg-1; RNA sequencing studies indicate that ttr-7 is affected by Manganese chloride; tiling array studies indicate that ttr-7 is enriched in the germline precursor cell and hypodermis a…	175213	9	9	0	8.94	5.73	5.05e-09	3.15e-07	0.29	1	N	N
310	lec-6	WBGene00002269	lec-6	Y55B1AR.1	Y55B1AR.1,Y55B1AR.1	7.19761	7.88891	4.61381	3.54222	intestine,pharynx	N.A.	lec-6 encodes a 'proto' type galectin (beta-galactosyl-binding lectin) containing a single carbohydrate recognition domain; by homology, LEC-6 may play roles in cell adhesion and aggregation, proliferation, or programmed cell death, but as loss of lec-6 activity via large-scale RNAi screens does not result in obvious abnormalities, the precise role of LEC-6 in C. elegans development and/or behavi…	175212	42	34	8	19.59	5.73	5.07e-09	3.15e-07	3.12	3.69	Y	N
311	ttr-39	WBGene00007304	ttr-39	C04G2.1	C04G2.1a,C04G2.1b,C04G2.1b,C04G2.1a	3.56826	2.09602	2.74749	7.99704	N.A.	N.A.	ttr-39 is involved in inductive cell migration.	182231	31	29	2	16.76	5.73	5.17e-09	3.2e-07	1.47	0.12	N	N
312	cpn-3	WBGene00000779	cpn-3	F28H1.2	F28H1.2,F28H1.2	10.067	9.88298	12.3074	8.42424	anal depressor muscle,anal region,anal sphincter muscle,body wall musculature,head neuron,intestinal muscle,vulva,vulval muscle	N.A.	cpn-3 encodes a calponin homolog, most closely related to its paralog CPN-4 in C. elegans; CPN-3 is more similar to the calponin paralogs transgelin (SM22 alpha) or neuronal protein NP25 than to calponin per se.	171986	39	35	4	18.83	5.72	5.39e-09	3.33e-07	0.33	0.29	Y	N
313	ins-35	WBGene00002118	ins-35	K02E2.4	K02E2.4,K02E2.4	-3.32888	2.24169	-1.44317	0.848871	ASEL,ASER,AWCL,AWCR,chemosensory neuron,head neuron,intestine,motor neuron,nerve ring neuron,rectum,sensory neuron,ventral nerve cord	dauer larva Ce,larva Ce	ins-35 encodes one of several insulin-related peptides.	180334	28	21	7	15.88	5.72	5.48e-09	3.38e-07	0	0.13	N	N
314	T22C8.6	WBGene00011927	T22C8.6	T22C8.6	T22C8.6,T22C8.6:wp175,T22C8.6	0.124764	1.1393	-3.14865	-1.69788	N.A.	N.A.	Microarray studies indicate that T22C8.6 is affected by Dafa#1 and Sirolimus; tiling array and RNA sequencing studies indicate that T22C8.6 is enriched in the hypodermis and intestine.	188734	45	37	8	20.25	5.71	5.5e-09	3.38e-07	0.76	0.38	Y	N
315	C35C5.9	WBGene00007958	C35C5.9	C35C5.9	C35C5.9,C35C5.9:wp83,C35C5.9.1,C35C5.9.2	5.86416	2.27994	2.87766	1.23228	N.A.	N.A.	Microarray and RNA sequencing studies indicate that C35C5.9 is affected by Aldicarb, Tunicamycin, Manganese chloride, D-glucose, Cry5B, Hydrolyzable Tannins, Humic substances, Paraquat, adsorbable organic bromine compounds, and Sirolimus; tiling array and microarray studies indicate that C35C5.9 is enriched in the cephalic sheath cell, hypodermis, and intestine and in the dopaminergic neurons.	183231	45	35	10	20.22	5.71	5.8e-09	3.55e-07	0.12	2	Y	N
317	W01B11.6	WBGene00020917	W01B11.6	W01B11.6	W01B11.6,W01B11.6b:wp112,W01B11.6,W01B11.6b:wp251	7.50565	4.1838	5.486	5.93071	N.A.	N.A.	W01B11.6 is an ortholog of human TXNL1 (thioredoxin like 1); W01B11.6 is predicted to have protein disulfide oxidoreductase activity, based on protein domain information.	171903	45	32	13	20.21	5.7	5.95e-09	3.62e-07	0	0.25	N	N
318	gst-7	WBGene00001755	gst-7	F11G11.2	F11G11.2,F11G11.2	6.88091	7.68765	6.13974	5.39009	germ line,head,hypodermis,intestine	adult Ce	gst-7 encodes a predicted glutathione S-transferase.	173842	46	40	6	20.43	5.7	6.02e-09	3.65e-07	0.61	1	Y	Y
320	obr-2	WBGene00008832	obr-2	F14H8.1	F14H8.1a,F14H8.1b,F14H8.1c,F14H8.1:wp111,F14H8.1c,F14H8.1b,F14H8.1a	4.43643	4.22524	3.4009	2.58153	N.A.	N.A.	obr-2 is an ortholog of human OSBPL1A (oxysterol binding protein like 1A) and OSBPL2 (oxysterol binding protein like 2); obr-2 is involved in embryo development and lipid storage.	180003	44	35	9	19.91	5.68	6.61e-09	3.98e-07	0.33	0.4	N	N
321	Y73F4A.3	WBGene00013516	Y73F4A.3	Y73F4A.3	Y73F4A.3,Y73F4A.3	-1.1756	3.42493	2.59359	0.204131	N.A.	N.A.	Microarray and RNA sequencing studies indicate that Y73F4A.3 is affected by Hydrogen sulfide, Methylmercuric chloride, Bisphenol A, Estrogen, Ethanol, Diazinon, Humic substances, Selenium, adsorbable organic bromine compounds, and Sirolimus.	177721	37	28	9	18.19	5.67	6.95e-09	4.18e-07	1.33	0.43	Y	N
322	vap-2	WBGene00011462	vap-2	T05A10.5	T05A10.5a,T05A10.5b,T05A10.5c,T05A10.5:wp209,T05A10.5c,T05A10.5b,T05A10.5a	2.56422	0.375259	-0.694329	0.253913	N.A.	N.A.	vap-2 is an ortholog of human PI16 (peptidase inhibitor 16); microarray, tiling array, and RNA sequencing studies indicate that vap-2 is affected by atx-3, sma-2, sma-4, rsr-2, eat-2, daf-2, ham-3, hyl-2, daf-16, sir-2.1, eri-1, rrf-3, dpy-10, zip-2, daf-19, mir-35, nuo-6, and pmk-1; microarray and RNA sequencing studies indicate that vap-2 is affected by Hydrogen sulfide, Ethanol, Methylmercury …	181273	43	35	8	19.64	5.67	7.06e-09	4.23e-07	0	0.3	N	N
323	C46C2.2	WBGene00008110	C46C2.2	C46C2.2	C46C2.2,C46C2.2:wp92,C46C2.2.1,C46C2.2.2	3.88789	4.62193	6.01694	5.68934	N.A.	N.A.	C46C2.2 is an ortholog of human SLC22A5 (solute carrier family 22 member 5) and SLC22A4 (solute carrier family 22 member 4); C46C2.2 is predicted to have transmembrane transporter activity, based on protein domain information.	177744	43	35	8	19.62	5.67	7.3e-09	4.36e-07	1.11	0.68	Y	Y
324	K03A11.5	WBGene00010522	K03A11.5	K03A11.5	K03A11.5,K03A11.5:wp101,K03A11.5:wp191,K03A11.5	1.11765	1.63492	0.841787	3.6057	N.A.	N.A.	RNA sequencing and microarray studies indicate that K03A11.5 is affected by Bisphenol S, Resveratrol, Sirolimus, and Allantoin; microarray and tiling array studies indicate that K03A11.5 is enriched in the PVD, OLL, DA, VA, and dopaminergic neurons.	181436	38	31	7	18.4	5.66	7.45e-09	4.43e-07	0.29	0.99	N	N
325	F40A3.2	WBGene00018217	F40A3.2	F40A3.2	F40A3.2,F40A3.2	6.55965	3.74311	2.90958	2.1346	N.A.	N.A.	F40A3.2 is an ortholog of human FGG (fibrinogen gamma chain); RNA sequencing and microarray studies indicate that F40A3.2 is affected by Rotenone, Resveratrol, Humic substances, and Sirolimus; tiling array and RNA sequencing studies indicate that F40A3.2 is enriched in the cephalic sheath cell, germline precursor cell, hypodermis, and germ line and in the dopaminergic and RID neurons.	179169	43	32	11	19.6	5.66	7.61e-09	4.51e-07	0.98	1.12	Y	N
329	Y51B9A.9	WBGene00013091	Y51B9A.9	Y51B9A.9	Y51B9A.9,Y51B9A.9	-1.14984	0.683287	-4.65562	-4.38464	N.A.	N.A.	Y51B9A.9 is an ortholog of human MAPK9 (mitogen-activated protein kinase 9), MAPK8 (mitogen-activated protein kinase 8) and MAPK10 (mitogen-activated protein kinase 10); Y51B9A.9 is predicted to have ATP binding activity and protein kinase activity, based on protein domain information.	174489	39	33	6	18.56	5.63	8.78e-09	5.15e-07	0.91	1.99	N	Y
330	kin-16	WBGene00002200	kin-16	M176.7	M176.7,M176.7.1,M176.7.2	3.62905	0.542144	-0.840282	-1.66916	hyp6,hyp7 syncytium	postembryonic Ce	kin-16 encodes a novel receptor protein tyrosine kinase; like kin-15, with which it is cotranscribed, kin-16 encodes a protein that displays some unusual features, including a very small extracellular domain (50 amino acids) that lacks a cysteine-rich region typical of ligand-binding domains of known receptor tyrosine kinases, an unusual amino acid substitution in the subdomain VI motif, and a la…	174499	41	34	7	19.04	5.63	8.91e-09	5.21e-07	1.25	0.36	Y	N
331	F47B8.1	WBGene00009802	F47B8.1	F47B8.1	F47B8.1,F47B8.1	3.88913	-4.51365	-4.64076	-3.88809	N.A.	N.A.	Microarray and tiling array studies indicate that F47B8.1 is affected by cyc-1, age-1, daf-12, rsr-2, and clk-1; microarray studies indicate that F47B8.1 is affected by Resveratrol; microarray studies indicate that F47B8.1 is enriched in the muscle cell.	185894	38	29	9	18.31	5.63	8.95e-09	5.22e-07	1.87	0.13	N	N
332	brp-1	WBGene00000273	brp-1	Y79H2A.1	Y79H2A.1a,Y79H2A.1b,Y79H2A.1c,Y79H2A.1d,Y79H2A.1e,Y79H2A.1b,Y79H2A.1e,Y79H2A.1a,Y79H2A.1d,Y79H2A.1c	10.2514	7.56061	6.81276	7.01104	N.A.	N.A.	brp-1 encodes a glutamine-rich protein that is conserved in nematodes, but that has no known homologies or sequence motifs; BRP-1 is able to bypass the need for the S. cerevisiae mating pheromone MAP kinase cascade to activate the mating pheromone-responsive gene FUSl.	176637	42	35	7	19.24	5.62	9.46e-09	5.49e-07	0	0.46	N	N
333	lipl-2	WBGene00009773	lipl-2	F46B6.8	F46B6.8,F46B6.8	1.2799	3.98678	-2.24129	-0.941911	N.A.	N.A.	lipl-2 is an ortholog of members of the human Lipases family including LIPF; lipl-2 is predicted to have hydrolase activity, acting on ester bonds, based on protein domain information.	185840	46	34	12	20.16	5.62	9.53e-09	5.52e-07	0	1.23	N	Y
334	pfk-1.1	WBGene00022199	pfk-1.1	Y71H10A.1	Y71H10A.1a,Y71H10A.1b:wp129,Y71H10A.1b:wp245,Y71H10A.1b,Y71H10A.1a	5.40036	5.19748	6.67908	6.83382	germ line,hypodermis,neuron,NSML,NSMR,pharynx,ventral cord neuron	adult Ce,embryo Ce,L1 larva Ce,L2 larva Ce,L3 larva Ce,L4 larva Ce	pfk-1.1 encodes two isoforms of a 6-phosphofructokinase (E.C. 2.7.1.11), paralogous to PFK-1.2; pfk-1.1 is an essential gene, and expressed in proximal germline and in several larval and adult tissues (including neurons, hypodermis, and pharyngeal muscle).	180583	37	36	1	18.02	5.62	9.64e-09	5.57e-07	0.99	0	N	N
336	hex-1	WBGene00020509	hex-1	T14F9.3	T14F9.3,T14F9.3.1,T14F9.3.2,T14F9.3.3	5.01719	5.04601	6.95024	6.84492	body wall musculature,coelomocyte,dorsal nerve cord,head neuron,hmc,lateral nerve cord,nerve ring,nervous system,neuron,pharyngeal neuron,pharynx,tail neuron,ventral cord neuron,ventral nerve cord	adult Ce,embryo Ce,L1 larva Ce,L2 larva Ce,L3 larva Ce,L4 larva Ce,larva Ce	hex-1 encodes a beta-N-acetylhexosaminidase that is orthologous to the human gene CERVICAL CANCER PROTO-ONCOGENE 7 (HEXB; OMIM:606873), which when mutated leads to disease.	180533	40	30	10	18.67	5.59	1.11e-08	6.36e-07	1.45	0.36	N	N
337	C50D2.6	WBGene00016809	C50D2.6	C50D2.6	C50D2.6a,C50D2.6b,C50D2.6c,C50D2.6:wp105,C50D2.6a,C50D2.6b,C50D2.6c.1,C50D2.6c.2,C50D2.6c.3,C50D2.6c.4	1.87573	1.94702	1.64489	5.42789	N.A.	N.A.	RNA sequencing and microarray studies indicate that C50D2.6 is affected by Bisphenol S, Chlorpyrifos, Humic substances, Paraquat, Colistin, Allantoin, and Sirolimus; microarray, tiling array, and RNA sequencing studies indicate that C50D2.6 is enriched in the ventral nerve cord, intestine, and body wall musculature and in neurons including PVD, OLL, DA, VA, GABAergic, NSM, I5, SAB, and retrovesic…	3565416	45	35	10	19.82	5.59	1.14e-08	6.54e-07	0.12	0	N	N
338	djr-1.2	WBGene00016789	djr-1.2	C49G7.11	C49G7.11,C49G7.11	-2.5887	-0.0878772	-1.50474	1.85473	coelomocyte,excretory canal,excretory cell,head neuron,hmc,inner labial neuron,intestine,nerve ring,nervous system,PHAL,PHAR,pharyngeal muscle cell,pharyngeal-intestinal valve,pharynx,PHBL,PHBR,rectal epithelium,rectal gland cell,reproductive system,socket cell,spermatheca,tail neuron,ventral cord neuron,ventral nerve cord,vulva	adult Ce,dauer larva Ce,larva Ce	djr-1.2 encodes a glyoxylase orthologous to human DJ-1; DJR-1.2 is expressed throughout the life cycle in a variety of tissues including pharyngeal muscles, the pharyngeal-intestinal valve, the ventral nerve cord, spermatheca, rectal gland cell, inner labial (IL) cells of head neurons, the phasmid (PHA/PHB) neurons, and supporting sheath/socket cells, and in adults is also found in the head mesod…	183625	24	22	2	14.35	5.59	1.16e-08	6.62e-07	2.34	0	Y	N
339	F44A6.5	WBGene00009677	F44A6.5	F44A6.5	F44A6.5,F44A6.5	2.44995	2.82183	-1.20128	-3.95254	N.A.	N.A.	F44A6.5 encodes a novel protein conserved amongst nematodes.	185725	41	32	9	18.87	5.58	1.19e-08	6.75e-07	0	2.8	Y	Y
340	F15E6.3	WBGene00017484	F15E6.3	F15E6.3	F15E6.3,F15E6.3	4.06009	2.55383	0.587761	-0.654894	N.A.	N.A.	F15E6.3 is involved in reproduction.	177195	32	25	7	16.6	5.58	1.23e-08	6.95e-07	0.6	1.12	Y	N
341	M01F1.4	WBGene00010810	M01F1.4	M01F1.4	M01F1.4a,M01F1.4b,M01F1.4:wp52,M01F1.4a,M01F1.4b	3.06251	3.74334	4.11103	3.59678	N.A.	N.A.	M01F1.4 is an ortholog of human TMEM245 (transmembrane protein 245); microarray studies indicate that M01F1.4 is affected by Hydrolyzable Tannins and Sirolimus; tiling array, microarray, and RNA sequencing studies indicate that M01F1.4 is enriched in the coelomocytes and germ line and in the AVE and FLP neurons.	175457	46	36	10	20	5.57	1.24e-08	7.02e-07	0.55	0.12	Y	N
342	W02D7.5	WBGene00020941	W02D7.5	W02D7.5	W02D7.5,W02D7.5:wp109,W02D7.5	-0.132279	-0.10272	0.422903	1.43652	N.A.	N.A.	Microarray and RNA sequencing studies indicate that W02D7.5 is affected by cyc-1, lin-15B, atfs-1, spg-7, clk-1, tdp-1, daf-16, let-418, chd-3, daf-12, dpy-21, sir-2.1, dpy-9, dpy-10, fbf-1, mir-243, daf-2, hcf-1, isp-1, and nuo-6; RNA sequencing and microarray studies indicate that W02D7.5 is affected by Rotenone, Hydrolyzable Tannins, Humic substances, Paraquat, and Sirolimus; RNA sequencing st…	189117	45	36	9	19.74	5.57	1.31e-08	7.37e-07	0.72	1.07	N	Y
343	best-5	WBGene00007404	best-5	C07A9.8	C07A9.8,C07A9.8:wp98,C07A9.8	-2.76055	0.594595	-4.47354	-2.70513	N.A.	N.A.	best-5 is an ortholog of human Best4 (bestrophin 4), Best3 (bestrophin 3), Best2 (bestrophin 2) and Best1 (bestrophin 1); microarray and RNA sequencing studies indicate that best-5 is affected by rde-4, zfp-1, lin-15B, eat-2, clk-1, daf-2, skn-1, swsn-2.2, npr-1, dop-1, rbr-2, dpy-21, ahr-1, tax-6, octr-1, hcf-1, sir-2.1, and nhr-25; microarray and RNA sequencing studies indicate that best-5 is a…	176367	34	28	6	17.06	5.55	1.4e-08	7.88e-07	0.46	0.78	N	Y
344	Y70C5A.3	WBGene00050904	Y70C5A.3	Y70C5A.3	Y70C5A.3,Y70C5A.3	-3.14351	0.279411	-5.8388	-2.74259	N.A.	N.A.	Microarray and RNA sequencing studies indicate that Y70C5A.3 is affected by nhr-114, eat-2, emr-1, lem-2, wrn-1, daf-2, glp-1, jmjd-3.1, hyl-2, hsf-1, mir-60, dpy-10, daf-19, tdp-1, and mir-35; microarray studies indicate that Y70C5A.3 is affected by Tunicamycin, Cry5B, Humic substances, and Sirolimus; tiling array studies indicate that Y70C5A.3 is enriched in the intestine.	6418793	40	32	8	18.53	5.55	1.42e-08	7.94e-07	1.15	1.91	N	Y
345	K09H9.5	WBGene00019597	K09H9.5	K09H9.5	K09H9.5,K09H9.5a:wp124,K09H9.5a:wp175,K09H9.5b:wp175,K09H9.5	5.23644	1.85692	0.0669816	-0.116711	N.A.	N.A.	Microarray and RNA sequencing studies indicate that K09H9.5 is affected by cyc-1, sma-2, age-1, clk-1, daf-2, csr-1, daf-16, dop-1, dpy-21, daf-12, and mir-243; RNA sequencing studies indicate that K09H9.5 is affected by Nicotinic acid, Rotenone, and D-glucose; tiling array and RNA sequencing studies indicate that K09H9.5 is enriched in the hypodermis and germ line and in the PVD and OLL neurons.	187241	9	9	0	8.65	5.54	1.48e-08	8.29e-07	1.83	0.91	Y	N
346	F35F10.6	WBGene00018056	F35F10.6	F35F10.6	F35F10.6,F35F10.6:wp218,F35F10.6.1,F35F10.6.2	4.00124	2.48726	4.59013	-1.80467	N.A.	N.A.	F35F10.6 is an ortholog of human PGPEP1L (pyroglutamyl-peptidase I-like) and PGPEP1 (pyroglutamyl-peptidase I); microarray, tiling array, and RNA sequencing studies indicate that F35F10.6 is affected by lin-35, hpl-2, wdr-23, prg-1, ubc-9, clk-1, tdp-1, daf-2, dop-1, hsf-1, daf-16, lin-14, lin-4, mir-243, isp-1, and nuo-6; microarray and RNA sequencing studies indicate that F35F10.6 is affected b…	185311	40	30	10	18.5	5.54	1.52e-08	8.45e-07	1.05	0.41	N	N
347	F22B8.7	WBGene00009049	F22B8.7	F22B8.7	F22B8.7,F22B8.7:wp132,F22B8.7.1,F22B8.7.2	2.34086	3.95291	4.55426	2.8949	N.A.	N.A.	F22B8.7 is an ortholog of human MARC2 (mitochondrial amidoxime reducing component 2) and MARC1 (mitochondrial amidoxime reducing component 1); F22B8.7 is involved in regulation of protein deneddylation; F22B8.7 is predicted to have catalytic activity, molybdenum ion binding activity, and pyridoxal phosphate binding activity, based on protein domain information; F22B8.7 is localized to the cytopla…	180078	44	35	9	19.4	5.53	1.59e-08	8.84e-07	0.75	0.23	Y	Y
348	fkh-7	WBGene00001439	fkh-7	F26D12.1	F26D12.1a,F26D12.1b,F26D12.1e,F26D12.1f,F26D12.1g,F26D12.1h,F26D12.1i,F26D12.1j,F26D12.1k,F26D12.1l,F26D12.1m,F26D12.1n,F26D12.1o,F26D12.1p,F26D12.1:wp83,F26D12.1:wp96,F26D12.1a:wp115,F26D12.1b:wp115,F26D12.1c:wp115,F26D12.1c:wp240,F26D12.1d:wp122,F26D12.1d:wp240,F26D12.1c,F26D12.1d,F26D12.1k,F26D12.1g,F26D12.1a,F26D12.1j,F26D12.1h.1,F26D12.1h.2,F26D12.1m.1,F26D12.1m.2,F26D12.1l.1,F26D12.1l.2,F26…	3.6707	3.20012	2.7217	3.9865	body wall musculature,head,head neuron,hypodermis,intestine,muscle cell,nerve ring neuron,neuron,pharynx,reproductive system,spermatheca,tail neuron,ventral nerve cord,vulva	1.5-fold embryo Ce,2-fold embryo Ce,3-fold embryo Ce,adult Ce,all stages Ce,bean embryo Ce,comma embryo Ce,L1 larva Ce,L2 larva Ce,L3 larva Ce,L4 larva Ce,larva Ce	fkh-7 encodes one of 15 forkhead transcriptional regulators encoded by the C. elegans genome; by homology, FKH-7 is predicted to function as a transcription factor that regulates gene expression during development; however, as loss of fkh-7 activity via RNA-mediated interference (RNAi) does not result in any obvious abnormalities, the precise role of FKH-7 in C. elegans development and/or behavio…	177340	20	17	3	12.95	5.53	1.6e-08	8.88e-07	0.52	1.13	N	N
349	C16E9.1	WBGene00015865	C16E9.1	C16E9.1	C16E9.1,C16E9.1:wp107,C16E9.1	0.49338	1.72669	-1.00345	1.53057	N.A.	N.A.	C16E9.1 is an ortholog of human MATN2 (matrilin 2) and MATN1 (matrilin 1, cartilage matrix protein); microarray and RNA sequencing studies indicate that C16E9.1 is affected by Hydrogen sulfide, Methylmercury hydroxide, 1-methylnicotinamide, Nicotinic acid, Rotenone, D-glucose, Resveratrol, Quercetin, Hydrolyzable Tannins, Humic substances, Dafa#1, and adsorbable organic bromine compounds; tiling …	182693	40	36	4	18.46	5.53	1.61e-08	8.91e-07	1.23	1.26	N	N
350	ZK742.4	WBGene00022814	ZK742.4	ZK742.4	ZK742.4,ZK742.4	3.19976	2.56877	2.60228	3.73962	N.A.	N.A.	ZK742.4 encodes a predicted NADH:flavin oxidoreductase; by sequence similarity, the product of ZK742.4 is predicted to play a role in lipid metabolism; ZK742.4 expression is regulated by the DAF-16 FOXO transcription factor.	179159	46	32	14	19.81	5.52	1.69e-08	9.29e-07	1.44	0	Y	N
352	ZK1055.7	WBGene00022848	ZK1055.7	ZK1055.7	ZK1055.7,ZK1055.7	4.01062	6.00289	3.58512	3.57183	N.A.	N.A.	ZK1055.7 is involved in innate immune response.	179051	42	34	8	18.83	5.5	1.93e-08	1.06e-06	1.12	1.46	N	N
353	fipr-13	WBGene00010183	fipr-13	F57A8.8	F57A8.8,F57A8.8	3.15106	2.28694	3.40152	1.84905	N.A.	N.A.	Microarray, tiling array, and RNA sequencing studies indicate that fipr-13 is affected by sma-2, sma-4, hpl-2, eat-2, blmp-1, bar-1, hlh-30, clk-1, htz-1, lin-35, npr-1, hsf-1, elli-1, and daf-2; tiling array and RNA sequencing studies indicate that fipr-13 is enriched in the body wall muscle cell and germ line and in the dopaminergic neurons.	3565474	9	9	0	8.58	5.5	1.95e-08	1.07e-06	0.44	0	N	N
355	T28F4.5	WBGene00012140	T28F4.5	T28F4.5	T28F4.5,T28F4.5.1,T28F4.5.2	8.67189	6.50008	6.20491	7.06267	N.A.	N.A.	The T28F4.5 gene encodes a homolog of Death Associated Protein 1 (DAP-1) protein that may be involved in apoptosis.	172503	46	33	13	19.72	5.49	1.97e-08	1.07e-06	1.61	0.45	N	N
356	F59E11.7	WBGene00019113	F59E11.7	F59E11.7	F59E11.7a,F59E11.7b,F59E11.7a,F59E11.7b	0.75215	1.71601	-0.298806	1.85649	AVG	adult Ce,larva Ce	F59E11.7 is expressed in certain interneurons.	179277	41	30	11	18.56	5.49	2.06e-08	1.12e-06	1.59	0.57	Y	N
357	F53E10.1	WBGene00018758	F53E10.1	F53E10.1	F53E10.1,F53E10.1	3.6785	3.69752	1.94023	1.79727	excretory cell,gonadal sheath cell,head,hypodermis,intestine,reproductive system,vulva	adult Ce,larva Ce	F53E10.1 is an ortholog of human MARC2 (mitochondrial amidoxime reducing component 2) and MARC1 (mitochondrial amidoxime reducing component 1); F53E10.1 is predicted to have catalytic activity, molybdenum ion binding activity, and pyridoxal phosphate binding activity, based on protein domain information; F53E10.1 is expressed in the hypodermis, head, reproductive system, intestine, and the excret…	178729	45	37	8	19.47	5.49	2.06e-08	1.11e-06	0.43	2.29	Y	Y
358	ech-7	WBGene00001156	ech-7	Y105E8A.4	Y105E8A.4,Y105E8A.4	4.20265	5.02806	1.22311	2.19465	N.A.	N.A.	ech-7 is an ortholog of human ECHS1 (enoyl-CoA hydratase, short chain 1); ech-7 is predicted to have catalytic activity, based on protein domain information.	173300	22	21	1	13.46	5.47	2.22e-08	1.2e-06	0	0	N	N
360	akt-1	WBGene00000102	akt-1	C12D8.10	C12D8.10a,C12D8.10b,C12D8.10c,C12D8.10b.1,C12D8.10b.2,C12D8.10a.1,C12D8.10a.2,C12D8.10c	5.39003	4.7197	5.07864	6.0719	excretory canal,head neuron,hypodermis,intestine,isthmus,motor neuron,pharyngeal muscle cell,pharyngeal neuron,rectal gland cell,spermatheca,tail neuron,touch receptor neuron,vulva	fully-elongated embryo Ce,postembryonic Ce	akt-1 encodes an ortholog of the serine/threonine kinase Akt/PKB; akt-1 genetically interacts with the insulin signaling pathway and functions to regulate such processes as dauer larval development and salt chemotaxis learning; AKT-1 binds calmodulin in vitro in a calcium-dependent manner; an AKT-1::GFP fusion protein is widely expressed beginning in late stage embryos and continuing through adul…	179424	46	35	11	19.61	5.46	2.33e-08	1.25e-06	0.98	0.23	N	Y
361	Y6E2A.5	WBGene00012399	Y6E2A.5	Y6E2A.5	Y6E2A.5,Y6E2A.5:wp182,Y6E2A.5	-1.86567	-0.110808	-1.07121	0.333609	N.A.	N.A.	Microarray, tiling array, and RNA sequencing studies indicate that Y6E2A.5 is affected by lin-35, cyc-1, lin-15B, hpl-2, nhr-114, eat-2, bar-1, clk-1, wrn-1, daf-2, glp-1, daf-16, npr-1, jmjd-3.1, hsf-1, daf-12, his-24, and hpl-1; RNA sequencing and microarray studies indicate that Y6E2A.5 is affected by Multi-walled carbon nanotubes, Acrylamide, Colistin, and Sirolimus; tiling array, RNA sequenc…	189376	32	30	2	16.27	5.46	2.35e-08	1.25e-06	0.99	0.23	Y	Y
362	K09C4.5	WBGene00019550	K09C4.5	K09C4.5	K09C4.5,K09C4.5:wp128,K09C4.5:wp187,K09C4.5	-1.77386	3.15807	-3.39178	-2.67754	N.A.	N.A.	K09C4.5 is an ortholog of members of the human SLC (Solute carriers) family including SLC2A9; K09C4.5 is involved in lipid storage; K09C4.5 is predicted to have transmembrane transporter activity, based on protein domain information.	187195	44	33	11	19.15	5.46	2.41e-08	1.28e-06	0.63	0.52	N	Y
363	che-10	WBGene00018051	che-10	F35D11.11	F35D11.11a,F35D11.11b,F35D11.11c,F35D11.11d,F35D11.11a:wp154,F35D11.11a:wp164,F35D11.11b:wp154,F35D11.11b:wp164,F35D11.11c:wp154,F35D11.11c:wp164,F35D11.11d:wp88,F35D11.11d:wp92,F35D11.11d:wp197,F35D11.11a,F35D11.11c,F35D11.11d.1,F35D11.11d.2,F35D11.11d.3,F35D11.11b	5.52586	3.32328	3.50567	6.1363	N.A.	N.A.	che-10 encodes, by alternative splicing, at least four isoforms of a rootletin ortholog required for ciliogenesis; che-10(ks69) mutants have strong but not absolute defects in cilium initiation, forming 1-2 short cilia per amphid channel and showing intraflagellar transport (IFT) along these vestigial cilia; che-10(ks69) mutants have no remaining cilia in their phasmid channels, and abnormal IFT …	173801	46	37	9	19.56	5.45	2.53e-08	1.35e-06	0.21	0.23	N	N
364	C03G6.17	WBGene00015402	C03G6.17	C03G6.17	C03G6.17,C03G6.17:wp106,C03G6.17	6.06397	0.291405	2.24275	1.5821	N.A.	N.A.	Microarray and RNA sequencing studies indicate that C03G6.17 is affected by clk-1, daf-2, skn-1, daf-16, hsf-1, dpy-21, daf-12, sir-2.1, tax-6, hcf-1, cdk-4, cyd-1, isp-1, nuo-6, pmk-1, and lin-35; microarray and RNA sequencing studies indicate that C03G6.17 is affected by Tunicamycin, D-glucose, Resveratrol, and Quercetin; microarray, tiling array, and RNA sequencing studies indicate that C03G6.…	182179	35	29	6	16.98	5.44	2.6e-08	1.38e-06	0.38	0.13	Y	N
365	F58B4.3	WBGene00010236	F58B4.3	F58B4.3	F58B4.3a,F58B4.3b,F58B4.3a,F58B4.3b	2.97806	2.97882	4.37908	6.83837	ASEL,ASER,neuron	N.A.	F58B4.3 is expressed in the nervous system.	186495	38	29	9	17.71	5.44	2.62e-08	1.38e-06	0	1.23	N	N
366	F21C10.11	WBGene00017660	F21C10.11	F21C10.11	F21C10.11a,F21C10.11b,F21C10.11:wp155,F21C10.11a,F21C10.11b	2.24661	5.27619	-0.161395	-1.06152	N.A.	N.A.	Microarray and RNA sequencing studies indicate that F21C10.11 is affected by Diallyl trisulfide, Ethanol, Methylmercury hydroxide, 1-methylnicotinamide, Rotenone, Cry5B, Chlorpyrifos, Diazinon, and Colistin; tiling array and RNA sequencing studies indicate that F21C10.11 is enriched in the intestine and amphid sheath cell and in the dopaminergic neurons.	179293	8	8	0	8	5.44	2.65e-08	1.4e-06	1.4	0.61	N	Y
368	scl-25	WBGene00011841	scl-25	T19C9.5	T19C9.5,T19C9.5	0.884094	-3.88359	-3.74616	1.31391	N.A.	N.A.	Microarray and RNA sequencing studies indicate that scl-25 is affected by sma-2, bar-1, clk-1, dpy-21, sir-2.1, lin-14, lin-4, cdk-4, cyd-1, his-24, hpl-1, and hpl-2; microarray studies indicate that scl-25 is affected by Mercuric Chloride, Tunicamycin, Resveratrol, Colistin, Dafa#1, and Sirolimus; tiling array and RNA sequencing studies indicate that scl-25 is enriched in the male and in neurons…	188600	35	29	6	16.88	5.41	3.13e-08	1.64e-06	1	0.13	N	N
369	C38C3.4	WBGene00016513	C38C3.4	C38C3.4	C38C3.4b,C38C3.4a:wp249,C38C3.4b:wp249,C38C3.4a,C38C3.4b	1.03553	1.79011	3.50522	1.17196	N.A.	N.A.	C38C3.4 is an ortholog of human TTBK2 (tau tubulin kinase 2); C38C3.4 is predicted to have ATP binding activity and protein kinase activity, based on protein domain information.	178641	36	33	3	17.12	5.41	3.15e-08	1.65e-06	0.36	0.23	N	N
371	grsp-2	WBGene00012118	grsp-2	T28C6.1	T28C6.1a,T28C6.1b,T28C6.1c,T28C6.1d,T28C6.1e,T28C6.1f,T28C6.1g,T28C6.1:wp109,T28C6.1f.1,T28C6.1f.2,T28C6.1b.1,T28C6.1b.2,T28C6.1g.1,T28C6.1g.2,T28C6.1c,T28C6.1e,T28C6.1a.1,T28C6.1a.2,T28C6.1d	4.71087	2.11219	-0.324726	0.336237	N.A.	N.A.	grsp-2 encodes a glycine-rich protein, predicted to be secreted; grsp-2 transcript levels are up-regulated in response to infection with the fungus Drechmeria coniospora.	177693	39	33	6	17.83	5.4	3.24e-08	1.69e-06	0.38	0.13	Y	N
372	Y4C6B.2	WBGene00021156	Y4C6B.2	Y4C6B.2	Y4C6B.2a,Y4C6B.2b,Y4C6B.2a,Y4C6B.2b	3.57369	0.245523	-1.88011	2.33936	N.A.	N.A.	Y4C6B.2 is involved in locomotion.	189355	22	18	4	13.29	5.4	3.25e-08	1.68e-06	0.95	0.86	N	N
373	flp-34	WBGene00019975	flp-34	R09A1.5	R09A1.5a,R09A1.5b,R09A1.5c,R09A1.5b,R09A1.5a	1.75794	2.46355	1.03499	5.5902	rectal gland cell	adult Ce,larva Ce	flp-34 is expressed in the rectal gland cell.	178606	9	9	0	8.43	5.4	3.29e-08	1.7e-06	0	0.29	N	N
374	C07A12.7	WBGene00015561	C07A12.7	C07A12.7	C07A12.7a,C07A12.7b,C07A12.7c,C07A12.7a.1,C07A12.7a.2,C07A12.7c,C07A12.7b.1,C07A12.7b.2	6.15318	5.42127	4.75832	6.70411	N.A.	N.A.	C07A12.7 is an ortholog of human TOM1L2 (target of myb1 like 2 membrane trafficking protein) and TOM1 (target of myb1 membrane trafficking protein); proteomic, microarray, tiling array, and RNA sequencing studies indicate that C07A12.7 is affected by daf-2, cyc-1, daf-12, wdr-23, gld-1, let-7, glp-1, swsn-2.2, daf-16, dpy-21, hlh-30, cebp-1, dcr-1, alg-1, fbf-1, tdp-1, and eat-2; RNA sequencing a…	180723	45	36	9	19.17	5.4	3.33e-08	1.72e-06	0.99	1.27	N	N
375	flp-1	WBGene00001444	flp-1	F23B2.5	F23B2.5a,F23B2.5b,F23B2.5c,F23B2.5:wp87,F23B2.5a,F23B2.5b,F23B2.5c	7.37376	6.78969	6.22322	11.698	AIAL,AIAR,AIYL,AIYR,AVAL,AVAR,AVEL,AVER,AVKL,AVKR,head neuron,M5 neuron,nerve ring,neuron,RIGL,RIGR,RMGL,RMGR	all stages Ce	flp-1 can encode up to seven distinct, yet highly similar, FMRFamide-related peptides (FaRPs), small neuromodulatory peptides that are characterized by a C-terminal Arg-Phe-amide motif; in C. elegans, FLP-1 peptides are required for regulation of several behaviors, including well-coordinated, sinusoidal movement and the transition between active and inactive states of egg-laying; receptors for th…	177737	44	39	5	18.95	5.4	3.33e-08	1.71e-06	0.56	0.94	N	N
376	T22F7.4	WBGene00020703	T22F7.4	T22F7.4	T22F7.4,T22F7.4:wp154,T22F7.4	1.9655	3.78552	4.50493	6.60105	N.A.	N.A.	RNA sequencing and microarray studies indicate that T22F7.4 is affected by 1-methylnicotinamide, Nicotinic acid, Rotenone, Quercetin, and Colistin; microarray, tiling array, and RNA sequencing studies indicate that T22F7.4 is enriched in the coelomocytes and in neurons including the PVD, OLL, AFD, ASER, and RID neurons.	188758	39	32	7	17.79	5.39	3.44e-08	1.77e-06	2	1.17	N	N
377	W01A8.2	WBGene00012164	W01A8.2	W01A8.2	W01A8.2a,W01A8.2:wp128,W01A8.2b,W01A8.2a,W01A8.2:wp159	0.856649	2.72982	2.36625	0.317953	N.A.	N.A.	W01A8.2 is an ortholog of human C15orf40 (chromosome 15 open reading frame 40); tiling array, RNA sequencing, and microarray studies indicate that W01A8.2 is affected by daf-16, tatn-1, skn-1, glp-1, daf-2, let-418, chd-3, sir-2.1, fbf-1, and isp-1; microarray studies indicate that W01A8.2 is affected by Resveratrol, Cry5B, Quercetin, Humic substances, and Paraquat; RNA sequencing and microarray …	172436	45	38	7	19.13	5.39	3.54e-08	1.81e-06	0.82	0.58	N	N
378	W01A8.8	WBGene00044988	W01A8.8	W01A8.8	W01A8.8a,W01A8.8b,W01A8.8c,W01A8.8a,W01A8.8b.1,W01A8.8b.2	2.77834	3.63563	4.10705	0.0763754	N.A.	N.A.	W01A8.8 is an ortholog of human STC2 (stanniocalcin 2) and STC1 (stanniocalcin 1); W01A8.8 is predicted to have hormone activity, based on protein domain information.	4926920	45	38	7	19.13	5.39	3.54e-08	1.81e-06	1.89	0.29	Y	Y
380	math-45	WBGene00021772	math-45	Y51H7BM.1	Y51H7BM.1,Y51H7BM.1:wp90,Y51H7BM.1:wp94,Y51H7BM.1:wp222,Y51H7BM.1	-1.61789	-4.65928	-5.29536	-4.5243	N.A.	N.A.	Microarray, tiling array, and RNA sequencing studies indicate that math-45 is affected by lin-15B, hpl-2, hcf-1, nhr-114, eat-2, prg-1, clk-1, daf-2, skn-1, jmjd-1.2, hsf-1, rbr-2, dpy-21, elli-1, and mir-243; RNA sequencing and microarray studies indicate that math-45 is affected by Rotenone, Mianserin, D-glucose, and Colistin; tiling array studies indicate that math-45 is enriched in the intest…	173526	9	9	0	8.4	5.38	3.72e-08	1.89e-06	0	2.4	Y	N
381	T23F2.2	WBGene00020735	T23F2.2	T23F2.2	T23F2.2a,T23F2.2b,T23F2.2b,T23F2.2a	1.97823	2.71596	3.72076	4.8924	N.A.	N.A.	T23F2.2 is an ortholog of human COA1 (cytochrome c oxidase assembly factor 1); RNA sequencing and microarray studies indicate that T23F2.2 is affected by wdr-23, emr-1, lem-2, daf-2, glp-1, cco-1, jmjd-3.1, jmjd-1.2, let-418, chd-3, hrp-2, slr-2, mir-243, and mir-35; microarray studies indicate that T23F2.2 is affected by Chlorpyrifos and Diazinon; RNA sequencing and microarray studies indicate t…	180822	35	29	6	16.75	5.37	3.99e-08	2.02e-06	0.43	0	N	N
382	T27E4.7	WBGene00020865	T27E4.7	T27E4.7	T27E4.7,T27E4.7	8.0921	4.74233	3.99655	5.52957	N.A.	N.A.	T27E4.7 is involved in lipid storage.	179285	42	33	9	18.38	5.36	4.1e-08	2.07e-06	0.55	1.55	Y	N
383	C50H2.13	WBGene00008246	C50H2.13	C50H2.13	C50H2.13,C50H2.13	0.542815	1.19739	-3.7233	-1.52882	N.A.	N.A.	RNA sequencing and microarray studies indicate that C50H2.13 is affected by eat-2, daf-16, jmjd-3.1, jmjd-1.2, dpy-21, and daf-2; microarray studies indicate that C50H2.13 is affected by Colistin; tiling array and RNA sequencing studies indicate that C50H2.13 is enriched in the intestine and germ line.	259642	9	9	0	8.35	5.35	4.38e-08	2.2e-06	0	2.16	N	N
384	col-139	WBGene00000712	col-139	F41F3.4	F41F3.4,F41F3.4	7.29246	8.86221	7.25868	5.69043	N.A.	N.A.	col-139 is involved in body morphogenesis and locomotion; col-139 is a structural constituent of cuticle, based on protein domain information.	178857	43	33	10	18.56	5.35	4.4e-08	2.21e-06	1.02	1.97	Y	N
385	ttm-2	WBGene00017840	ttm-2	F26G1.4	F26G1.4,F26G1.4	3.57247	2.67268	0.411267	0.863164	N.A.	N.A.	ttm-2 is an ortholog of members of the human ARRDC (Alpha arrestins) family including ARRDC2; microarray and RNA sequencing studies indicate that ttm-2 is affected by zfp-1, eat-2, daf-2, glp-1, daf-16, jmjd-3.1, jmjd-1.2, mir-60, let-418, chd-3, skn-1, sir-2.1, dcr-1, rde-4, spg-7, and tbx-2; microarray studies indicate that ttm-2 is affected by Tunicamycin, Cry5B, Hydrolyzable Tannins, Humic su…	184995	44	37	7	18.77	5.35	4.47e-08	2.24e-06	0.19	0	Y	N
386	H32K16.2	WBGene00010422	H32K16.2	H32K16.2	H32K16.2,H32K16.2	2.77717	-0.0309221	-2.23102	-4.0454	N.A.	N.A.	Tiling array, RNA sequencing, and microarray studies indicate that H32K16.2 is affected by hpl-2, nhr-62, eat-2, prg-1, tdp-1, csr-1, pgl-1, pgl-3, glh-4, glh-1, daf-2, ham-3, elt-2, cco-1, dpy-27, set-25, met-2, daf-16, and dpy-21; microarray and RNA sequencing studies indicate that H32K16.2 is affected by Methylmercuric chloride, Rotenone, and D-glucose; tiling array and RNA sequencing studies …	3565869	8	8	0	7.86	5.35	4.51e-08	2.25e-06	0	1.1	Y	N
388	Y4C6B.7	WBGene00021161	Y4C6B.7	Y4C6B.7	Y4C6B.7a,Y4C6B.7b,Y4C6B.7:wp183,Y4C6B.7b,Y4C6B.7a	4.22256	5.27607	7.32484	3.28249	N.A.	N.A.	Microarray and RNA sequencing studies indicate that Y4C6B.7 is affected by sma-2, prg-1, tdp-1, daf-2, glp-1, hsf-1, daf-12, daf-16, dpy-21, and hcf-1; RNA sequencing studies indicate that Y4C6B.7 is affected by Rotenone; tiling array and RNA sequencing studies indicate that Y4C6B.7 is enriched in the body wall muscle cell and germ line and in the dopaminergic neurons.	3565268	9	9	0	8.33	5.34	4.68e-08	2.33e-06	0.18	0.23	Y	N
389	cyp-33C2	WBGene00016697	cyp-33C2	C45H4.17	C45H4.17a,C45H4.17b,C45H4.17a,C45H4.17b	-0.762878	-0.915703	-2.88243	-0.417096	intestine	N.A.	cyp-33C2 is an ortholog of human RP11-400G3.5 and members of the CYP2 (Cytochrome P4502) family including CYP2C9; cyp-33C2 is predicted to have heme binding activity, iron ion binding activity, and oxidoreductase activity, acting on paired donors, with incorporation or reduction of molecular oxygen, based on protein domain information; cyp-33C2 is expressed in the intestine.	178695	30	23	7	15.38	5.33	4.79e-08	2.37e-06	0	0.81	Y	N
390	T26C5.4	WBGene00012034	T26C5.4	T26C5.4	T26C5.4,T26C5.4	1.34872	1.91274	2.65132	3.45904	N.A.	N.A.	T26C5.4 is involved in embryo development.	188916	45	31	14	18.92	5.33	5e-08	2.47e-06	0.88	0.23	Y	N
391	ZK512.7	WBGene00013986	ZK512.7	ZK512.7	ZK512.7,ZK512.7	7.38651	3.87769	3.99211	2.67961	N.A.	N.A.	ZK512.7 is involved in reproduction.	176290	46	37	9	19.13	5.33	5.04e-08	2.48e-06	0.34	0	N	N
392	C11G10.1	WBGene00007525	C11G10.1	C11G10.1	C11G10.1,C11G10.1:wp178,C11G10.1	5.69749	0.953848	-0.863859	-0.38825	N.A.	N.A.	RNA sequencing and microarray studies indicate that C11G10.1 is affected by Multi-walled carbon nanotubes, Quercetin, Hydrolyzable Tannins, Humic substances, Sirolimus, and Allantoin; tiling array studies indicate that C11G10.1 is enriched in the hypodermis.	182521	45	34	11	18.87	5.31	5.41e-08	2.66e-06	1.98	0.54	Y	N
393	gst-41	WBGene00001789	gst-41	R13D7.7	R13D7.7,R13D7.7	-0.0909466	-1.83781	0.659205	-0.323911	N.A.	N.A.	gst-41 is an ortholog of human GSTP1 (glutathione S-transferase pi 1); microarray, tiling array, RNA sequencing, and proteomic studies indicate that gst-41 is affected by daf-16, lin-35, hpl-2, rsr-2, daf-2, rsks-1, blmp-1, prg-1, clk-1, wrn-1, jmjd-1.2, set-25, met-2, dep-1, daf-12, dpy-21, crh-1, tax-6, and isp-1; RNA sequencing and microarray studies indicate that gst-41 is affected by Rotenon…	179127	33	25	8	16.08	5.31	5.51e-08	2.7e-06	1.46	0.29	N	N
394	col-103	WBGene00000677	col-103	F56B3.1	F56B3.1,F56B3.1	10.1284	6.9189	7.42042	6.66214	N.A.	N.A.	col-103 encodes a collagen.	176901	32	26	6	15.81	5.3	5.71e-08	2.79e-06	0.61	0	Y	N
395	C02F12.5	WBGene00015355	C02F12.5	C02F12.5	C02F12.5,C02F12.5:wp171,C02F12.5	4.24289	1.1061	2.86724	0.145857	nervous system,reproductive system,spermatheca,tail neuron	adult Ce,larva Ce	C02F12.5 encodes a putatively secreted protein with a Kunitz/bovine pancreatic trypsin inhibitor domain; C02F12.5 has no obvious function in mass RNAi assays.	180656	39	31	8	17.49	5.3	5.77e-08	2.82e-06	3.36	0.86	Y	N
396	F54D5.3	WBGene00010049	F54D5.3	F54D5.3	F54D5.3,F54D5.3:wp52,F54D5.3	5.80459	6.67519	0.0285698	1.95113	N.A.	L4 larva Ce	RNA sequencing and microarray studies indicate that F54D5.3 is affected by Rotenone, Estrogen, Progesterone, Ethanol, Deoxyglucose, Acrylamide, Fluoranthene, Hydrolyzable Tannins, Humic substances, Paraquat, and Allantoin; tiling array, RNA sequencing, and microarray studies indicate that F54D5.3 is enriched in the intestine, pharyngeal muscle cell, and germ line.	174773	44	33	11	18.6	5.3	5.89e-08	2.87e-06	0.23	1.61	N	Y
397	F23F1.6	WBGene00017747	F23F1.6	F23F1.6	F23F1.6,F23F1.6	1.47255	0.836356	0.0186123	-1.30245	N.A.	N.A.	F23F1.6 is an ortholog of human SLC7A4 (solute carrier family 7 member 4); F23F1.6 is involved in determination of adult lifespan and lipid storage; F23F1.6 is predicted to have amino acid transmembrane transporter activity, based on protein domain information.	184903	32	28	4	15.79	5.3	5.93e-08	2.88e-06	0.59	0.75	Y	N
398	T07G12.5	WBGene00011596	T07G12.5	T07G12.5	T07G12.5a,T07G12.5b,T07G12.5c,T07G12.5c,T07G12.5b,T07G12.5a	-2.02024	-1.81257	-3.65552	-2.76368	N.A.	N.A.	T07G12.5 is an ortholog of human SLC23A3 (solute carrier family 23 member 3), SLC23A2 (solute carrier family 23 member 2) and SLC23A1 (solute carrier family 23 member 1); T07G12.5 is predicted to have transporter activity, based on protein domain information.	177946	37	28	9	17.01	5.3	5.94e-08	2.88e-06	1.21	1.45	Y	N
399	F16B4.7	WBGene00017509	F16B4.7	F16B4.7	F16B4.7,F16B4.7	1.19603	-0.76426	-0.54019	2.271	N.A.	N.A.	Microarray, tiling array, and RNA sequencing studies indicate that F16B4.7 is affected by vhl-1, rsr-2, daf-2, dpy-21, daf-12, daf-16, his-24, hpl-1, and hpl-2; RNA sequencing and microarray studies indicate that F16B4.7 is affected by Rotenone, Progesterone, Resveratrol, Cadmium, Diazinon, and single-walled carbon nanotubes.	178646	43	32	11	18.36	5.29	6.11e-08	2.96e-06	0.73	2.59	N	N
401	F53B1.8	WBGene00018739	F53B1.8	F53B1.8	F53B1.8a,F53B1.8b,F53B1.8:wp188,F53B1.8:wp242,F53B1.8b,F53B1.8a	4.40626	3.00856	4.88086	5.55555	N.A.	N.A.	F53B1.8 is an ortholog of members of the human SLC (Solute carriers) family including SLCO5A1; F53B1.8 is predicted to have transporter activity, based on protein domain information.	180528	27	25	2	14.39	5.27	6.96e-08	3.35e-06	0.64	0.13	N	N
402	B0507.2	WBGene00015219	B0507.2	B0507.2	B0507.2,B0507.2:wp90,B0507.2	3.98124	4.16116	4.37343	5.03863	N.A.	N.A.	B0507.2 is an ortholog of human BROX (BRO1 domain and CAAX motif containing); microarray, proteomic, RNA sequencing, and tiling array studies indicate that B0507.2 is affected by cyc-1, nhr-8, gld-1, let-7, clk-1, daf-2, hsf-1, mes-2, sir-2.1, dcr-1, spg-7, and nuo-6; microarray studies indicate that B0507.2 is affected by Fluoranthene, Cry5B, Diazinon, and Sirolimus; tiling array, RNA sequencing…	179255	46	37	9	18.92	5.26	7.04e-08	3.38e-06	1.71	1.14	Y	Y
403	snf-3	WBGene00004902	snf-3	T13B5.1	T13B5.1,T13B5.1	6.29953	3.75292	5.90268	5.69639	ADEL,ADER,AQR,excretory canal,excretory cell,head neuron,hypodermis,inner labial neuron,nervous system,neuron,outer labial neuron,tail hypodermis,vulval cell	adult Ce,larva Ce	snf-3 is an ortholog of human SLC6A8 (solute carrier family 6 member 8); snf-3 is involved in amino-acid betaine transport; snf-3 exhibits amino-acid betaine transmembrane transporter activity and is predicted to have neurotransmitter:sodium symporter activity, based on protein domain information; snf-3 is expressed in the hypodermis, nervous system, excretory cell, and the vulval cell.	173493	37	29	8	16.9	5.26	7.22e-08	3.46e-06	0.38	0.56	Y	N
406	C07E3.3	WBGene00007414	C07E3.3	C07E3.3	C07E3.3a,C07E3.3b,C07E3.3:wp90,C07E3.3b,C07E3.3a	3.09121	3.58477	1.50158	1.07272	N.A.	N.A.	Microarray and RNA sequencing studies indicate that C07E3.3 is affected by Diallyl trisulfide, Rotenone, D-glucose, Cry5B, Chlorpyrifos, Quercetin, Humic substances, single-walled carbon nanotubes, Paraquat, Colistin, and Sirolimus; tiling array studies indicate that C07E3.3 is enriched in the intestine and pharyngeal muscle cell.	174601	22	18	4	12.89	5.24	8.18e-08	3.89e-06	0.8	0.35	Y	N
407	plin-1	WBGene00007024	plin-1	W01A8.1	W01A8.1a,W01A8.1b,W01A8.1c,W01A8.1c.1,W01A8.1c.2,W01A8.1b.1,W01A8.1b.2,W01A8.1b.3,W01A8.1a.1,W01A8.1a.2	7.85165	7.425	6.64087	4.2726	germ line	adult Ce	plin-1 encodes a mammalian perilipin homolog, the similarity appears clearly in profile-to-sequence (PSI-BLAST) and profile-to-profile (HHpred) searches; mammalian perilipin family proteins coat lipid droplets (LDs) sub-cellularly and are known to regulate the size and formation of LDs; perilipins are also known to interact with adipose triglyceride lipases (ATGL) and hormone sensitive lipases (H…	172437	46	35	11	18.8	5.23	8.49e-08	4.02e-06	1.15	1.63	Y	Y
408	F49C12.6	WBGene00009876	F49C12.6	F49C12.6	F49C12.6,F49C12.6	1.61087	0.706305	-2.548	-2.91176	excretory cell	adult Ce,fully-elongated embryo Ce,L1 larva Ce,L2 larva Ce,L3 larva Ce,L4 larva Ce	F49C12.6 is an ortholog of human TMEM144 (transmembrane protein 144); F49C12.6 is expressed in the excretory cell.	186030	40	31	9	17.48	5.23	8.62e-08	4.07e-06	0.24	1.42	N	N
409	T25B2.2	WBGene00020786	T25B2.2	T25B2.2	T25B2.2a,T25B2.2b,T25B2.2c,T25B2.2:wp147,T25B2.2b.1,T25B2.2b.2,T25B2.2c,T25B2.2a.1,T25B2.2a.2	2.92553	2.71942	2.9315	2.67018	N.A.	N.A.	Tiling array, RNA sequencing, and microarray studies indicate that T25B2.2 is affected by rsr-2, nhr-62, eat-2, tatn-1, hlh-30, clk-1, daf-2, glp-1, hyl-2, daf-12, and mir-243; microarray and RNA sequencing studies indicate that T25B2.2 is affected by Aldicarb, Ethanol, Rotenone, Manganese chloride, D-glucose, Atrazine, Chlorpyrifos, Diazinon, and single-walled carbon nanotubes; RNA sequencing st…	180887	31	25	6	15.33	5.22	8.74e-08	4.12e-06	0.45	0.89	N	N
410	C25E10.12	WBGene00016101	C25E10.12	C25E10.12	C25E10.12,C25E10.12	5.04485	2.77562	2.95706	3.88829	arcade cell,head neuron,hypodermis,intestine,nervous system,seam cell	adult Ce,larva Ce	C25E10.12 encodes one of three C. elegans metallophoshopesterase that are related to human 239FB, which is encoded by a gene in the 11p13-p14 chromosomal region associated with various tumors and WAGR (Wilms' tumor, aniridia, genitourinary anomalies, and mental retardation) syndrome; large-scale expression studies suggest that C25E10.12 is expressed in a number of different tissues including the …	182896	36	29	7	16.52	5.21	9.19e-08	4.32e-06	1.79	1	Y	N
411	F40H3.1	WBGene00018249	F40H3.1	F40H3.1	F40H3.1a,F40H3.1b,F40H3.1:wp155,F40H3.1a,F40H3.1b	4.6347	2.70253	3.99263	4.37251	N.A.	N.A.	Microarray, RNA sequencing, and tiling array studies indicate that F40H3.1 is affected by cyc-1, daf-2, swsn-2.2, mes-6, slr-2, rnp-8, tdp-1, xpa-1, nuo-6, and eat-2; RNA sequencing and microarray studies indicate that F40H3.1 is affected by D-glucose, Hydrolyzable Tannins, and Ethosuximide; RNA sequencing studies indicate that F40H3.1 is enriched in the germ line.	185570	46	33	13	18.72	5.21	9.58e-08	4.49e-06	1.12	2.3	N	Y
412	vamp-8	WBGene00007200	vamp-8	B0513.9	B0513.9a,B0513.9b,B0513.9a,B0513.9b	1.49964	5.40423	3.2408	3.70265	nervous system,pharynx,tail neuron	adult Ce,larva Ce	vamp-8 is an ortholog of human VAMP8 (vesicle associated membrane protein 8); vamp-8 is expressed in the pharynx and the nervous system.	178349	9	9	0	8.13	5.2	9.77e-08	4.57e-06	1.73	0	Y	N
413	Y51F10.7	WBGene00021768	Y51F10.7	Y51F10.7	Y51F10.7,Y51F10.7	5.53142	6.50312	0.779119	2.5862	N.A.	N.A.	Microarray and RNA sequencing studies indicate that Y51F10.7 is affected by Cholesterol, Lathosterol, Diallyl trisulfide, Rotenone, Diazinon, Cry5B, Quercetin, Hydrolyzable Tannins, Humic substances, Sirolimus, and Ag nanoparticles; microarray, tiling array, and RNA sequencing studies indicate that Y51F10.7 is enriched in the intestine, pharyngeal muscle cell, and germ line and in the PVD and OLL…	171761	32	29	3	15.52	5.2	9.79e-08	4.57e-06	0.36	2.4	Y	Y
414	K02D7.1	WBGene00019298	K02D7.1	K02D7.1	K02D7.1a,K02D7.1b,K02D7.1b,K02D7.1a.1,K02D7.1a.2	7.41094	5.7555	4.39354	4.72812	intestine	adult Ce,larva Ce	K02D7.1 is orthologous to the human gene PURINE NUCLEOSIDE PHOSPHORYLASE (NP; OMIM:164050), which when mutated leads to disease.	176851	46	36	10	18.69	5.2	9.99e-08	4.66e-06	0.29	0.27	Y	Y
415	Y39A3CR.5	WBGene00021445	Y39A3CR.5	Y39A3CR.5	Y39A3CR.5,Y39A3CR.5:wp99,Y39A3CR.5	0.828896	1.04413	1.96245	-1.75009	N.A.	N.A.	Microarray and RNA sequencing studies indicate that Y39A3CR.5 is affected by cyc-1, clk-1, htz-1, lin-35, dpy-21, alg-1, mir-243, aak-2, tax-6, daf-2, tbx-2, and nhr-25; RNA sequencing studies indicate that Y39A3CR.5 is enriched in the Z4 and Z1.	189727	36	30	6	16.43	5.19	1.08e-07	5.01e-06	0.44	0	N	N
416	H03A11.1	WBGene00010356	H03A11.1	H03A11.1	H03A11.1,H03A11.1	4.06021	4.58352	4.84523	4.29926	N.A.	N.A.	H03A11.1 encodes an FAM20 ortholog; murine FAM20A is a secreted protein expressed in hematopoietic cells.	181616	44	33	11	18.22	5.18	1.08e-07	5.01e-06	1.15	0.12	Y	N
417	bgal-1	WBGene00011832	bgal-1	T19B10.3	T19B10.3,T19B10.3:wp138,T19B10.3.1,T19B10.3.2	2.50479	3.37661	6.2993	2.19359	hmc	adult Ce,larva Ce	The T19B10.3 gene encodes an ortholog of the human gene GALACTOSIDASE, BETA 1 (GLB1), which when mutated leads to gangliosidosis type I (OMIM:230500).	188583	42	32	10	17.77	5.18	1.12e-07	5.18e-06	1.93	0.84	Y	N
418	C27B7.9	WBGene00007765	C27B7.9	C27B7.9	C27B7.9,C27B7.9	6.00296	-0.963504	2.24067	-1.08063	N.A.	N.A.	RNA sequencing, tiling array, proteomic, and microarray studies indicate that C27B7.9 is affected by aak-2, hpl-2, prp-8, daf-2, blmp-1, bar-1, clk-1, ham-3, swsn-2.2, npr-1, jmjd-3.1, dpy-21, cco-1, mir-243, alg-1, and nasp-1; RNA sequencing and microarray studies indicate that C27B7.9 is affected by 1-methylnicotinamide, Methylmercuric chloride, Manganese chloride, D-glucose, Juglone, and Colis…	3565797	9	9	0	8.06	5.16	1.22e-07	5.61e-06	0.47	0	Y	N
419	C47E12.12	WBGene00008155	C47E12.12	C47E12.12	C47E12.12,C47E12.12:wp211,C47E12.12	-0.846496	-0.305122	-1.93855	-0.198259	N.A.	N.A.	Tiling array, RNA sequencing, and microarray studies indicate that C47E12.12 is affected by hpl-2, eat-2, alg-3, alg-4, clk-1, csr-1, npr-1, jmjd-3.1, jmjd-1.2, daf-2, daf-12, daf-16, and dpy-21; RNA sequencing studies indicate that C47E12.12 is affected by Manganese chloride and D-glucose; tiling array and RNA sequencing studies indicate that C47E12.12 is enriched in the body wall muscle cell, g…	3565389	8	8	0	7.59	5.16	1.23e-07	5.68e-06	0.15	0.99	N	N
420	F15E6.4	WBGene00017485	F15E6.4	F15E6.4	F15E6.4,F15E6.4	5.05064	4.63126	2.79873	-2.92145	N.A.	N.A.	Microarray and RNA sequencing studies indicate that F15E6.4 is affected by Methylmercuric chloride, Rotenone, Tunicamycin, Acrylamide, Cry5B, Hydrolyzable Tannins, Humic substances, and Colistin; tiling array and RNA sequencing studies indicate that F15E6.4 is enriched in the hypodermis and in the ASER and PLM neurons.	177193	40	29	11	17.25	5.15	1.28e-07	5.85e-06	0.55	0.75	Y	N
421	mca-1	WBGene00003151	mca-1	W09C2.3	W09C2.3a,W09C2.3b,W09C2.3c,W09C2.3d,W09C2.3:wp92,W09C2.3b,W09C2.3d,W09C2.3c,W09C2.3a	6.14586	4.23698	3.01804	2.18474	excretory canal	N.A.	mca-1 encodes one of three C. elegans plasma membrane Ca2+ ATPases (PMCAs); by homology, MCA-1 is predicted to function as a molecular pump that couples ATP hydrolysis to extrusion of cytosolic Ca2+; when expressed in insect cells, MCA-1 exhibits calcium-pumping ATPase activity and binding to human calmodulin; large-scale RNAi screens indicate that mca-1 activity is required for normal coordinate…	177795	38	33	5	16.77	5.15	1.33e-07	6.08e-06	0.34	0.29	N	N
422	ZC204.12	WBGene00022562	ZC204.12	ZC204.12	ZC204.12,ZC204.12	2.34015	5.35051	1.95745	0.437089	head neuron,intestine,pharynx	adult Ce,embryo Ce,L1 larva Ce,L2 larva Ce,L3 larva Ce,L4 larva Ce	ZC204.12 is expressed in the pharynx, intestine, and the head neurons.	173536	46	35	11	18.5	5.14	1.34e-07	6.12e-06	0	0.68	N	N
423	swm-1	WBGene00023417	swm-1	C25E10.9	C25E10.9,C25E10.9b:wp252,C25E10.9	2.91714	5.04324	7.0907	2.90687	N.A.	N.A.	swm-1 encodes a putative secreted TIL-domain protease inhibitor that, in males, inhibits unpolarized round spermatids from remodelling themselves into motile spermatozoa until their transfer to a hermaphrodite; SWM-1 is also required for efficient sperm transfer, and thus for male fertility; SWM-1 is biologically active from spermatogenesis in L4 larvae onward into adulthood, and functions non-au…	182893	45	36	9	18.29	5.14	1.35e-07	6.15e-06	0.47	1.49	Y	N
424	flp-12	WBGene00001455	flp-12	C05E11.8	C05E11.8a,C05E11.8:wp175,C05E11.8b:wp252,C05E11.8b,C05E11.8a	3.40488	5.21476	5.28568	9.11564	AVHL,AVHR,AVJL,AVJR,BAGL,BAGR,BDUL,BDUR,CP9,nerve ring,PDA,PVR,R1AL,R1AR,R1BL,R1BR,R4AL,R4AR,R4BL,R4BR,R5AL,R5AR,R5BL,R5BR,R7AL,R7AR,R7BL,R7BR,SAADL,SAADR,SAAVL,SAAVR,SDQL,SDQR,SMBDL,SMBDR,SMBVL,SMBVR	all stages Ce	flp-12 encodes a predicted FMRFamide-like peptide neurotransmitter that affects locomotion when injected into A. suum; expressed in the ASE and PVM sensory neurons.	180732	32	28	4	15.34	5.14	1.36e-07	6.2e-06	0.15	0	N	N
425	C06B3.6	WBGene00007365	C06B3.6	C06B3.6	C06B3.6,C06B3.6.1,C06B3.6.2	5.67566	6.15548	4.95991	3.56168	N.A.	N.A.	C06B3.6 is an ortholog of human EPHX1 (epoxide hydrolase 1); microarray and RNA sequencing studies indicate that C06B3.6 is affected by Diallyl trisulfide, Ethanol, 1-methylnicotinamide, Rotenone, Sodium arsenite, D-glucose, Bisphenol S, Cry5B, Quercetin, Humic substances, R24, Sirolimus, and Ag nanoparticles; tiling array, RNA sequencing, and microarray studies indicate that C06B3.6 is enriched …	182293	45	36	9	18.28	5.14	1.38e-07	6.24e-06	1.01	0.23	Y	Y
426	C01A2.2	WBGene00007214	C01A2.2	C01A2.2	C01A2.2a,C01A2.2b,C01A2.2a,C01A2.2b	2.35403	3.22927	0.29674	0.276384	N.A.	N.A.	Microarray studies indicate that C01A2.2 is affected by Quercetin, Colistin, and Dafa#1; tiling array studies indicate that C01A2.2 is enriched in the germline precursor cell and hypodermis.	173208	41	30	11	17.41	5.14	1.39e-07	6.3e-06	0.41	1.23	Y	N
427	gnrr-2	WBGene00007614	gnrr-2	C15H11.2	C15H11.2a,C15H11.2b,C15H11.2b:wp236,C15H11.2a,C15H11.2b	0.818244	3.26896	1.93951	4.47974	N.A.	N.A.	gnrr-2 is involved in embryo development; gnrr-2 is predicted to have G-protein coupled receptor activity, based on protein domain information.	182647	43	34	9	17.83	5.13	1.43e-07	6.44e-06	1.63	0.13	N	N
428	C06G3.3	WBGene00015549	C06G3.3	C06G3.3	C06G3.3,C06G3.3	2.79774	0.528847	4.41503	2.28869	N.A.	N.A.	Microarray, RNA sequencing, and tiling array studies indicate that C06G3.3 is affected by rheb-1, cyc-1, lin-15B, spe-44, daf-2, rsks-1, ubc-9, clk-1, htz-1, lin-35, daf-16, jmjd-3.1, elli-1, ain-1, and isp-1; microarray and RNA sequencing studies indicate that C06G3.3 is affected by Tunicamycin, Mianserin, Quercetin, single-walled carbon nanotubes, and Sirolimus.	177472	42	33	9	17.61	5.13	1.44e-07	6.47e-06	2.22	0.39	Y	N
429	F55C10.5	WBGene00010109	F55C10.5	F55C10.5	F55C10.5,F55C10.5	3.41822	5.34808	5.314	5.90755	N.A.	N.A.	F55C10.5 is an ortholog of members of the human PPP1R (Protein phosphatase 1 regulatory subunits) family including PPP1R14A; RNA sequencing and microarray studies indicate that F55C10.5 is affected by eat-2, hlh-30, daf-2, daf-16, swsn-2.2, jmjd-3.1, hsf-1, daf-12, dpy-21, and alg-1; tiling array and RNA sequencing studies indicate that F55C10.5 is enriched in the ventral nerve cord and germ line…	3564818	9	9	0	8.01	5.13	1.48e-07	6.64e-06	0.35	1.29	N	N
430	F45D3.4	WBGene00009724	F45D3.4	F45D3.4	F45D3.4a,F45D3.4b,F45D3.4a.1,F45D3.4a.2,F45D3.4b.1,F45D3.4b.2	8.0134	4.74705	2.52569	3.91621	N.A.	N.A.	RNA sequencing and microarray studies indicate that F45D3.4 is affected by Ethanol, 1-methylnicotinamide, Rotenone, Bisphenol A, Cry5B, Ivermectin, Quercetin, Humic substances, R24, single-walled carbon nanotubes, and Sirolimus; microarray, tiling array, and RNA sequencing studies indicate that F45D3.4 is enriched in the germline precursor cell, hypodermis, germ line, intestine, body wall muscula…	179718	44	33	11	18.01	5.12	1.49e-07	6.7e-06	1.49	3.82	Y	N
431	nex-2	WBGene00003589	nex-2	T07C4.9	T07C4.9a,T07C4.9b,T07C4.9a,T07C4.9b.1,T07C4.9b.2	4.30318	7.29223	5.76839	3.69619	pharynx	adult Ce,embryo Ce,L1 larva Ce,L2 larva Ce,L3 larva Ce,L4 larva Ce,larva Ce	nex-2 encodes an annexin, a member of a family of calcium-dependent phospholipid binding proteins; by homology, NEX-2 could function in a number of processes, such as membrane fusion, cytoskeletal interactions, and intracellular signaling; however, as loss of nex-2 function via RNA-mediated interference (RNAi) does not result in any abnormalities, the precise role of NEX-2 in C. elegans developme…	176446	44	34	10	18	5.12	1.52e-07	6.79e-06	0.18	0.23	N	N
432	T03F6.4	WBGene00011400	T03F6.4	T03F6.4	T03F6.4,T03F6.4:wp90,T03F6.4	1.54309	2.84082	2.43402	3.44011	N.A.	N.A.	Microarray, tiling array, and RNA sequencing studies indicate that T03F6.4 is affected by age-1, hpl-2, nhr-62, eat-2, blmp-1, drh-3, clk-1, daf-2, swsn-2.2, lin-14, lin-4, ain-1, ain-2, dpy-9, dpy-10, tax-6, daf-19, mir-35, and nuo-6; RNA sequencing and microarray studies indicate that T03F6.4 is affected by Rotenone, D-glucose, Neurotoxins, Hydrolyzable Tannins, single-walled carbon nanotubes, …	188023	30	25	5	14.78	5.12	1.52e-07	6.78e-06	0.6	0	N	N
433	F02C12.1	WBGene00008515	F02C12.1	F02C12.1	F02C12.1,F02C12.1:wp83,F02C12.1:wp187,F02C12.1:wp234,F02C12.1	3.47099	3.94185	4.02652	0.729156	N.A.	N.A.	F02C12.1 is predicted to have zinc ion binding activity, based on protein domain information.	181461	40	31	9	17.14	5.12	1.53e-07	6.8e-06	1.5	0.4	N	Y
434	T04C12.3	WBGene00011428	T04C12.3	T04C12.3	T04C12.3,T04C12.3.1,T04C12.3.2	5.57458	5.14942	5.02373	9.62844	N.A.	N.A.	Microarray and RNA sequencing studies indicate that T04C12.3 is affected by Aldicarb, Nicotinic acid, Rotenone, Multi-walled carbon nanotubes, D-glucose, Atrazine, Chlorpyrifos, Humic substances, Paraquat, and Ethosuximide; microarray, tiling array, and RNA sequencing studies indicate that T04C12.3 is enriched in neurons including the GABAergic, BAG, dopaminergic, PVD, OLL, NSM, AFD, ASER, and DA…	179532	33	26	7	15.51	5.12	1.55e-07	6.89e-06	0.56	0.36	N	N
435	H16D19.3	WBGene00010401	H16D19.3	H16D19.3	H16D19.3,H16D19.3:wp192,H16D19.3	-0.913956	-3.39429	-4.55049	-4.05424	seam cell	adult Ce,fully-elongated embryo Ce,L1 larva Ce,L2 larva Ce,L3 larva Ce,L4 larva Ce	H16D19.3 is expressed in the seam cell.	186747	46	35	11	18.4	5.12	1.55e-07	6.89e-06	0.53	2.92	N	N
436	vem-1	WBGene00006890	vem-1	K07E3.8	K07E3.8,K07E3.8a:wp252,K07E3.8.1,K07E3.8.2	5.35634	5.60453	4.40325	4.95673	AVAL,AVAR,AVG,CEPDL,CEPDR,intestine,nerve ring,pharyngeal muscle cell,RIVL,RIVR,RMDDL,RMDDR,RMDL,RMDR,RMDVL,RMDVR,ventral nerve cord	adult Ce,elongating embryo Ce,enclosing embryo Ce,fully-elongated embryo Ce,gastrulating embryo Ce,L1 larva Ce,L2 larva Ce,L3 larva Ce,L4 larva Ce	vem-1 encodes a transmembrane protein that contains a cytochrome b5-like heme/steroid-binding domain and is orthologous to mammalian VEMA, a membrane-associated progesterone receptor component; in C. elegans, vem-1 is required for proper axonal guidance of ventral nerve cord neurons; vem-1 interacts genetically with unc-40, whose protein product also interacts with VEM-1; a VEM-1::GFP reporter fu…	181066	45	37	8	18.19	5.12	1.56e-07	6.92e-06	0.26	0.53	N	Y
437	pqn-44	WBGene00004131	pqn-44	F55A12.9	F55A12.9a,F55A12.9b,F55A12.9c,F55A12.9d,F55A12.9d.1,F55A12.9d.2,F55A12.9a,F55A12.9c,F55A12.9b	7.03536	6.16371	6.47361	7.45775	head neuron,nerve ring,nervous system,neuron,pharyngeal neuron,pharynx,reproductive system,seam cell,tail neuron,ventral cord neuron,vulva,vulval muscle	adult Ce,larva Ce	The protein product of this gene is predicted to contain a glutamine/asparagine (Q/N)-rich ('prion') domain, by the algorithm of Michelitsch and Weissman (as of the WS77 release of WormBase, i.e., in wormpep77).	172187	43	35	8	17.75	5.11	1.63e-07	7.18e-06	0.15	0.23	Y	N
438	cpg-3	WBGene00011063	cpg-3	R06C7.4	R06C7.4,R06C7.4.1,R06C7.4.2,R06C7.4.3	6.6443	3.6723	5.83088	3.32707	germ line	adult Ce	cgp-3 encodes a putatively secreted protein with an N-terminal low-complexity domain containing 15 potential chondroitin attachment sites, and a C-terminal EGF-like region; cpg-3 mRNA is enriched in oogenesis, but CPG-3 has no obvious function in mass RNAi assays.	172465	44	33	11	17.95	5.11	1.65e-07	7.28e-06	0.6	0.13	N	N
439	ttr-35	WBGene00017688	ttr-35	F22A3.2	F22A3.2,F22A3.2:wp142,F22A3.2	1.68035	4.85155	5.5528	-0.285725	N.A.	N.A.	ttr-35 is involved in striated muscle myosin thick filament assembly.	180925	46	39	7	18.36	5.1	1.66e-07	7.28e-06	1.75	1.12	N	N
440	abf-6	WBGene00000017	abf-6	T22H6.7	T22H6.7,T22H6.7	2.83369	3.40003	3.57759	3.57438	N.A.	N.A.	abf-6 encodes a homolog of the antibacterial factor ASABF from Ascaris suum; ABF-6 may play a role in innate immunity, though at present the only evidence for its having an antimicrobial humoral function is its sequence similarity.	181418	9	9	0	7.97	5.1	1.68e-07	7.35e-06	0.61	0.17	N	N
441	R53.5	WBGene00011274	R53.5	R53.5	R53.5,R53.5.1,R53.5.2	3.38047	5.48229	5.28552	4.0865	coelomocyte,head neuron,hmc,hypodermis,intestine,muscle cell,nerve ring,nervous system,pharynx,rectal gland cell,ventral cord neuron,ventral nerve cord	adult Ce,larva Ce	R53.5 is an ortholog of human FAM213A (family with sequence similarity 213 member A); R53.5 is involved in reproduction; R53.5 is expressed in the muscle cell, pharynx, hmc, hypodermis, nervous system, coelomocyte, intestine, and the rectal gland cell.	174555	34	29	5	15.7	5.1	1.7e-07	7.43e-06	1.53	0.48	Y	Y
442	R05H10.7	WBGene00011046	R05H10.7	R05H10.7	R05H10.7,R05H10.7	4.43322	-2.51988	-3.56132	-0.753152	N.A.	N.A.	RNA sequencing studies indicate that R05H10.7 is affected by daf-2, npr-1, and dpy-21; microarray and RNA sequencing studies indicate that R05H10.7 is affected by Mercuric Chloride, Tunicamycin, Multi-walled carbon nanotubes, and Colistin; RNA sequencing studies indicate that R05H10.7 is enriched in the male.	3565038	7	7	0	7	5.09	1.8e-07	7.84e-06	0.24	1.23	N	N
443	F08G12.5	WBGene00008588	F08G12.5	F08G12.5	F08G12.5,F08G12.5:wp131,F08G12.5	3.25943	2.55013	2.60463	2.33404	N.A.	N.A.	RNA sequencing, tiling array, and microarray studies indicate that F08G12.5 is affected by ham-3, swsn-2.2, npr-1, jmjd-3.1, elli-1, sir-2.1, dcr-1, ain-2, tax-6, daf-19, tdp-1, and tbx-2; microarray studies indicate that F08G12.5 is affected by Hydrogen sulfide, Diazinon, Copper sulfate, and Sirolimus; tiling array, microarray, and RNA sequencing studies indicate that F08G12.5 is enriched in the…	184211	44	37	7	17.87	5.08	1.86e-07	8.09e-06	0.21	0	Y	N
444	F23F1.2	WBGene00017743	F23F1.2	F23F1.2	F23F1.2,F23F1.2:wp179,F23F1.2	0.350927	3.8865	-0.804226	0.999503	N.A.	N.A.	F23F1.2 is an ortholog of human EFCAB6 (EF-hand calcium binding domain 6); F23F1.2 is predicted to have calcium ion binding activity, based on protein domain information.	184900	41	30	11	17.22	5.08	1.91e-07	8.29e-06	2.29	1.27	Y	N
446	C03G6.5	WBGene00015393	C03G6.5	C03G6.5	C03G6.5,C03G6.5:wp154,C03G6.5:wp220,C03G6.5	-0.278483	3.18947	2.62959	-1.49227	N.A.	N.A.	C03G6.5 is involved in locomotion.	179123	7	7	0	6.98	5.08	1.94e-07	8.37e-06	1.86	1	Y	N
447	C33E10.8	WBGene00016349	C33E10.8	C33E10.8	C33E10.8,C33E10.8:wp107,C33E10.8	0.574812	-0.893887	-2.45885	-3.92339	N.A.	N.A.	This gene encodes a protein containing an F-box, a motif predicted to mediate protein-protein interactions either with homologs of yeast Skp-1p or with other proteins.	183164	41	35	6	17.19	5.07	1.99e-07	8.58e-06	0.47	0.29	N	N
448	E04F6.4	WBGene00017124	E04F6.4	E04F6.4	E04F6.4,E04F6.4	-0.427574	1.93794	-0.992047	-1.3955	N.A.	N.A.	E04F6.4 is an ortholog of human PLD5 (phospholipase D family member 5) and PLD3 (phospholipase D family member 3); E04F6.4 is involved in embryo development, hermaphrodite genitalia development and nematode larval development; E04F6.4 is predicted to have catalytic activity, based on protein domain information.	174179	36	28	8	16.08	5.07	1.99e-07	8.58e-06	0.23	0	N	N
449	F41B4.1	WBGene00018257	F41B4.1	F41B4.1	F41B4.1,F41B4.1	4.22681	3.44888	6.87999	3.22927	N.A.	N.A.	Microarray, proteomic, and RNA sequencing studies indicate that F41B4.1 is affected by clk-1, cyc-1, gld-1, let-7, daf-2, npr-1, jmjd-1.2, let-418, chd-3, dpy-21, rde-4, dpy-10, tax-6, tdp-1, tbx-2, and eat-2; microarray studies indicate that F41B4.1 is affected by Resveratrol, Humic substances, single-walled carbon nanotubes, Dafa#1, and Sirolimus; tiling array, RNA sequencing, and microarray st…	180952	42	32	10	17.39	5.07	2.04e-07	8.74e-06	0	0	N	N
450	Y43F8B.1	WBGene00012812	Y43F8B.1	Y43F8B.1	Y43F8B.1a,Y43F8B.1b,Y43F8B.1c,Y43F8B.1d,Y43F8B.1e,Y43F8B.1:wp87,Y43F8B.1a.1,Y43F8B.1a.2,Y43F8B.1c,Y43F8B.1e,Y43F8B.1d,Y43F8B.1b	5.51619	7.17149	8.70209	4.92148	N.A.	N.A.	RNA sequencing and microarray studies indicate that Y43F8B.1 is affected by Rotenone, D-glucose, Chlorpyrifos, Diazinon, Humic substances, and Sirolimus; RNA sequencing and microarray studies indicate that Y43F8B.1 is enriched in the germ line and muscle cell.	180279	43	35	8	17.59	5.06	2.08e-07	8.9e-06	0.32	0.23	N	N
451	elo-6	WBGene00001244	elo-6	F41H10.8	F41H10.8,F41H10.8	5.50441	6.99094	3.13023	2.12983	amphid neuron,intestine,nerve ring,vulva	N.A.	The elo-6 gene encodes a paralog of elo-1 and elo-2, each of which encodes a polyunsaturated fatty acid (PUFA) elongase; ELO-6 may be required for a normally high growth rate.	177321	39	29	10	16.73	5.06	2.08e-07	8.89e-06	0.53	1	Y	Y
452	far-5	WBGene00001389	far-5	F15B9.3	F15B9.3a,F15B9.3b,F15B9.3:wp101,F15B9.3a,F15B9.3b.1,F15B9.3b.2	3.19287	2.54035	0.241286	-3.53823	male	adult Ce,adult hermaphrodite Ce,embryo Ce,L1 larva Ce,L2 larva Ce,L3 larva Ce,L4 larva Ce	far-5 encodes a member of a class of fatty acid-and retinol-binding proteins that are known to be secreted by parasitic nematodes and plants; far-5 binds lipid in fluorescence-based assays, however, the precise function of far-5 is not known.	184522	33	26	7	15.35	5.06	2.08e-07	8.89e-06	0.46	1.12	Y	N
453	F46H5.3	WBGene00018519	F46H5.3	F46H5.3	F46H5.3a,F46H5.3b,F46H5.3a:wp128,F46H5.3b.1,F46H5.3b.2,F46H5.3b.3,F46H5.3b.4,F46H5.3a.1,F46H5.3a.2,F46H5.3a.3,F46H5.3a.4	10.7404	10.6167	12.1665	9.86688	N.A.	N.A.	F46H5.3 is an ortholog of human CKMT2 (creatine kinase, mitochondrial 2), CKM (creatine kinase, M-type), CKB (creatine kinase B) and CKMT1B (creatine kinase, mitochondrial 1B); F46H5.3 is predicted to have kinase activity, based on protein domain information.	180986	45	37	8	17.99	5.06	2.14e-07	9.12e-06	0.7	0.36	N	N
454	C04F12.8	WBGene00007302	C04F12.8	C04F12.8	C04F12.8,C04F12.8	5.94695	3.71488	5.40187	5.38948	N.A.	N.A.	C04F12.8 is an ortholog of human DUSP21 (dual specificity phosphatase 21), DUSP18 (dual specificity phosphatase 18) and DUSP14 (dual specificity phosphatase 14); C04F12.8 is predicted to have protein tyrosine/serine/threonine phosphatase activity, based on protein domain information; C04F12.8 is localized to the striated muscle myosin thick filament.	182228	35	27	8	15.79	5.05	2.19e-07	9.31e-06	0	0.13	Y	N
456	thn-2	WBGene00009215	thn-2	F28D1.5	F28D1.5,F28D1.5.1,F28D1.5.2	3.82053	2.80722	-0.832031	-0.000195716	N.A.	N.A.	thn-2 is involved in defense response to Gram-negative bacterium.	178187	44	32	12	17.73	5.04	2.31e-07	9.76e-06	0	1.15	N	N
457	hsp-25	WBGene00002023	hsp-25	C09B8.6	C09B8.6a,C09B8.6b,C09B8.6c,C09B8.6c,C09B8.6a,C09B8.6b	9.07236	6.85392	8.99149	6.82836	body wall musculature,gonad,pharynx,spermatheca	adult Ce,all stages Ce	hsp-25 encodes a member of the small heat shock family of proteins; HSP-25 is expressed throughout development and in vitro, exhibits chaperone activity; HSP-25 localizes to: 1) dense bodies and M lines in body wall muscle, 2) the lining of the pharynx, and 3) to cell-cell junctions in the spermathecal wall; consistent with a role in myofibril organization, HSP-25 binds vinculin and alpha-actinin…	180872	45	35	10	17.88	5.03	2.5e-07	1.06e-05	0	0.26	N	N
458	cdr-4	WBGene00010470	cdr-4	K01D12.11	K01D12.11,K01D12.11	3.57103	6.94865	4.78105	4.08231	intestine,pharynx,pm5,pm6,pm7	N.A.	cdr-4 encodes a predicted transmembrane protein that is a member of the CDR (cadmium responsive) family of proteins; cdr-4 expression is upregulated in response to cadmium treatment.	259654	45	32	13	17.88	5.03	2.52e-07	1.06e-05	1	1	Y	N
459	F39G3.2	WBGene00018207	F39G3.2	F39G3.2	F39G3.2,F39G3.2:wp107,F39G3.2	-1.36915	1.05925	4.1597	-1.61771	N.A.	N.A.	Microarray and RNA sequencing studies indicate that F39G3.2 is affected by bar-1, daf-2, jmjd-1.2, hsf-1, let-418, daf-16, dpy-21, sir-2.1, and crh-1; microarray and RNA sequencing studies indicate that F39G3.2 is affected by Methylmercuric chloride, Rotenone, Manganese chloride, Resveratrol, Quercetin, Hydrolyzable Tannins, and Humic substances; tiling array, RNA sequencing, and microarray studi…	185501	44	37	7	17.66	5.02	2.59e-07	1.09e-05	1.33	0.23	N	N
460	ZK632.9	WBGene00014016	ZK632.9	ZK632.9	ZK632.9,ZK632.9:wp52,ZK632.9.1,ZK632.9.2	9.49665	7.2226	8.20137	7.00351	N.A.	N.A.	ZK632.9 is involved in negative regulation of vulval development and reproduction.	176394	45	36	9	17.86	5.02	2.61e-07	1.1e-05	1.86	0.23	Y	Y
462	ins-33	WBGene00002116	ins-33	W09C5.4	W09C5.4,W09C5.4	5.13945	2.42587	1.54482	0.123405	head muscle,head neuron,hypodermis,intestine,tail	L2 larva Ce	ins-33 encodes an insulin-like peptide of the insulin superfamily of proteins (OMIM:176730, 147440); INS-33 is one of 38 insulin-like peptides in C. elegans; loss of INS-33 function can result in embryonic lethality, slow growth, and lack of coordination; additionally, INS-33 appears to be a direct downstream target of LIN-14, a nuclear protein and key regulator of the temporal sequence of postem…	189313	39	32	7	16.54	5	2.84e-07	1.18e-05	1.48	1	Y	N
463	pmp-5	WBGene00004062	pmp-5	T10H9.5	T10H9.5a,T10H9.5b,T10H9.5c,T10H9.5b:wp121,T10H9.5c,T10H9.5a,T10H9.5b	2.21428	3.42118	3.36894	-1.7514	hypodermis,intestine	adult Ce,larva Ce	pmp-5 is an ortholog of human ABCD4 (ATP binding cassette subfamily D member 4); pmp-5 is predicted to have ATP binding activity and ATPase activity, coupled to transmembrane movement of substances, based on protein domain information; pmp-5 is expressed in the hypodermis and the intestine.	179056	34	26	8	15.4	5	2.88e-07	1.2e-05	1.73	1.36	Y	Y
464	F46H5.5	WBGene00018521	F46H5.5	F46H5.5	F46H5.5,F46H5.5	-2.4574	-0.299936	2.31434	3.35486	N.A.	N.A.	Microarray, tiling array, and RNA sequencing studies indicate that F46H5.5 is affected by clk-1, hpl-2, daf-2, rsks-1, ubc-9, wrn-1, glp-1, jmjd-3.1, mir-243, lin-54, daf-19, tdp-1, and eat-2; microarray studies indicate that F46H5.5 is affected by Resveratrol and Sirolimus; tiling array, RNA sequencing, and microarray studies indicate that F46H5.5 is enriched in neurons including the DA, VA, BAG…	185881	34	29	5	15.29	4.96	3.48e-07	1.45e-05	1.21	1.29	N	N
465	cutl-24	WBGene00021396	cutl-24	Y38C1AA.5	Y38C1AA.5a,Y38C1AA.5b,Y38C1AA.5c,Y38C1AA.5:wp98,Y38C1AA.5:wp129,Y38C1AA.5a,Y38C1AA.5b,Y38C1AA.5c	-1.22012	2.31362	-0.910378	2.11955	N.A.	N.A.	RNA sequencing and microarray studies indicate that cutl-24 is affected by eat-2, tatn-1, daf-2, hyl-2, chd-3, dcr-1, ain-1, ain-2, crh-1, daf-19, hcf-1, sir-2.1, and gei-8; RNA sequencing and microarray studies indicate that cutl-24 is affected by D-glucose, Cry5B, Colistin, Tyrosol, adsorbable organic bromine compounds, and Sirolimus; microarray studies indicate that cutl-24 is enriched in the …	176831	22	19	3	12.22	4.96	3.54e-07	1.47e-05	0.66	0.38	N	N
466	Y53F4B.23	WBGene00013169	Y53F4B.23	Y53F4B.23	Y53F4B.23,Y53F4B.23:wp109,Y53F4B.23:wp239,Y53F4B.23	4.11861	0.396788	-1.00969	-2.54169	N.A.	N.A.	Y53F4B.23 is involved in determination of adult lifespan.	190220	34	29	5	15.28	4.96	3.54e-07	1.47e-05	0.23	0	N	N
467	clc-2	WBGene00000523	clc-2	C01C10.1	C01C10.1,C01C10.1	1.39757	0.564674	-1.22	0.249379	hypodermis,seam cell	all stages Ce	clc-2 encodes a claudin homolog, closely similar to CLC-1, that is required for normal cohesion of apical junctions in epithelia; claudins are integral membrane proteins with four transmembrane sequences that are found in mammalian tight junctions (TJs), induce TJs when transgenically expressed in cells normally lacking them, and can mediate the specific conductance of of specific ions (e.g., mag…	180999	42	35	7	17.03	4.96	3.6e-07	1.49e-05	0.34	0.5	N	N
469	T03E6.8	WBGene00011397	T03E6.8	T03E6.8	T03E6.8,T03E6.8:wp90,T03E6.8:wp220,T03E6.8.1,T03E6.8.2	-2.44905	0.617227	-4.37166	-2.22133	N.A.	N.A.	T03E6.8 is involved in lipid storage.	180112	28	24	4	13.78	4.94	3.91e-07	1.61e-05	0	0	N	N
470	acp-6	WBGene00022245	acp-6	Y73B6BL.24	Y73B6BL.24,Y73B6BL.24	9.27945	5.41127	7.01358	8.35539	N.A.	N.A.	acp-6 is an ortholog of members of the human ACP (Acid phosphatases) family including ACP6; acp-6 is predicted to have acid phosphatase activity, based on protein domain information.	177407	21	18	3	11.87	4.93	4.06e-07	1.67e-05	0.19	1.64	N	N
472	D1086.2	WBGene00008389	D1086.2	D1086.2	D1086.2a,D1086.2b,D1086.2b,D1086.2a	-0.30135	-0.398006	3.03203	-0.269957	N.A.	N.A.	RNA sequencing and microarray studies indicate that D1086.2 is affected by wdr-23, ubc-9, clk-1, daf-2, npr-1, daf-16, dpy-21, daf-12, sir-2.1, dcr-1, tax-6, nhr-25, and lin-35; microarray studies indicate that D1086.2 is affected by Tryptophan, Cry5B, Quercetin, Humic substances, and Sirolimus; tiling array, RNA sequencing, and microarray studies indicate that D1086.2 is enriched in the body wal…	183931	37	25	12	15.81	4.91	4.54e-07	1.86e-05	0.29	0	Y	N
473	alh-11	WBGene00000117	alh-11	F42G9.5	F42G9.5a,F42G9.5b,F42G9.5a,F42G9.5b.1,F42G9.5b.2	4.3388	3.76286	3.11345	4.35031	N.A.	N.A.	alh-11 is an ortholog of human ALDH9A1 (aldehyde dehydrogenase 9 family member A1); alh-11 is predicted to have oxidoreductase activity, based on protein domain information.	185679	42	34	8	16.86	4.91	4.64e-07	1.89e-05	0.34	0.45	Y	Y
474	R05D8.7	WBGene00019885	R05D8.7	R05D8.7	R05D8.7,R05D8.7	1.70421	0.229675	0.495715	2.16654	N.A.	N.A.	R05D8.7 is an ortholog of human HSD17B14 (hydroxysteroid 17-beta dehydrogenase 14); R05D8.7 is involved in embryo development.	187608	23	21	2	12.37	4.9	4.67e-07	1.9e-05	0.36	0.45	N	N
475	R04D3.2	WBGene00011010	R04D3.2	R04D3.2	R04D3.2,R04D3.2	0.297293	-0.950839	0.80603	-3.15133	N.A.	N.A.	RNA sequencing and microarray studies indicate that R04D3.2 is affected by Methylmercury hydroxide, Ethanol, Quercetin, Hydrolyzable Tannins, Paraquat, Colistin, and Sirolimus; tiling array and RNA sequencing studies indicate that R04D3.2 is enriched in the germline precursor cell and germ line.	181451	45	36	9	17.46	4.9	4.69e-07	1.91e-05	0.34	0.23	N	N
476	F23D12.7	WBGene00009091	F23D12.7	F23D12.7	F23D12.7,F23D12.7	0.0706436	4.63849	5.92817	1.08314	N.A.	N.A.	RNA sequencing and microarray studies indicate that F23D12.7 is affected by aak-2, glp-1, jmjd-1.2, daf-16, daf-2, and alg-1; microarray and RNA sequencing studies indicate that F23D12.7 is affected by Hydrogen sulfide, Rotenone, and D-glucose; tiling array and RNA sequencing studies indicate that F23D12.7 is enriched in the body wall muscle cell and muscle cell and in the PVD and OLL neurons.	3565907	9	9	0	7.66	4.9	4.71e-07	1.91e-05	0.57	0.61	Y	N
477	C18E9.9	WBGene00007689	C18E9.9	C18E9.9	C18E9.9,C18E9.9	4.03904	5.96997	3.05199	1.38095	N.A.	N.A.	C18E9.9 is involved in innate immune response.	182792	46	36	10	17.66	4.9	4.72e-07	1.91e-05	1.7	0.46	Y	N
478	Y39A3CL.4	WBGene00021442	Y39A3CL.4	Y39A3CL.4	Y39A3CL.4a,Y39A3CL.4b,Y39A3CL.4c,Y39A3CL.4a:wp130,Y39A3CL.4a,Y39A3CL.4c.1,Y39A3CL.4c.2,Y39A3CL.4b	4.6014	3.47955	3.97474	3.99447	N.A.	N.A.	Y39A3CL.4 is involved in cellular response to DNA damage stimulus and determination of adult lifespan.	175325	34	30	4	15.11	4.9	4.72e-07	1.9e-05	0.35	0.23	Y	N
479	F35B12.3	WBGene00009383	F35B12.3	F35B12.3	F35B12.3,F35B12.3:wp87,F35B12.3	2.9397	4.09418	2.73252	2.13002	N.A.	N.A.	RNA sequencing and microarray studies indicate that F35B12.3 is affected by Rotenone, Bisphenol A, Cry5B, Resveratrol, Acrylamide, Cadmium, Chlorpyrifos, Diazinon, Quercetin, Hydrolyzable Tannins, single-walled carbon nanotubes, Selenium, Colistin, and Allantoin; microarray studies indicate that F35B12.3 is enriched in the PVD, OLL, and FLP neurons.	185258	40	28	12	16.43	4.9	4.75e-07	1.91e-05	0.8	0	N	N
480	F11A5.15	WBGene00008680	F11A5.15	F11A5.15	F11A5.15,F11A5.15	1.60949	-4.53287	-3.58139	-3.84091	N.A.	N.A.	Tiling array, microarray, and RNA sequencing studies indicate that F11A5.15 is affected by hpl-2, bar-1, clk-1, dop-1, daf-12, daf-16, and mir-243; microarray studies indicate that F11A5.15 is affected by Hydrogen sulfide; tiling array studies indicate that F11A5.15 is enriched in neurons.	3565598	9	9	0	7.65	4.9	4.87e-07	1.96e-05	1.15	1	N	N
481	fbxa-98	WBGene00007453	fbxa-98	C08F11.5	C08F11.5a,C08F11.5b,C08F11.5a,C08F11.5b	-1.55582	1.1901	-5.63246	-3.53295	N.A.	N.A.	This gene encodes a protein containing an F-box, a motif predicted to mediate protein-protein interactions either with homologs of yeast Skp-1p or with other proteins; this gene's encoded protein also contains an FTH/DUF38 motif, which may also mediate protein-protein interaction.	182421	39	32	7	16.17	4.89	5.06e-07	2.03e-05	0.69	1.36	N	N
482	xtr-1	WBGene00006965	xtr-1	F54F7.4	F54F7.4,F54F7.4:wp252,F54F7.4	-2.70128	1.46152	-0.387489	1.12253	N.A.	N.A.	xtr-1 encodes a protein with similarity to TRA-2A and TRA-2B in a region known as the MX region, hypothesized to be a protein-protein interaction domain involved in negatively regulating tra-2 activity in the germ line.	192057	40	27	13	16.37	4.89	5.15e-07	2.06e-05	1.69	0.64	Y	N
484	F47B8.3	WBGene00009804	F47B8.3	F47B8.3	F47B8.3,F47B8.3	2.20709	2.71741	2.32627	3.45489	DD neuron,head muscle,head neuron,hypodermis,intestinal cell,pharyngeal cell,VD neuron	adult Ce,L1 larva Ce,L2 larva Ce,L3 larva Ce,L4 larva Ce	F47B8.3 is an ortholog of human GLRX5 (glutaredoxin 5); F47B8.3 is involved in lipid storage; F47B8.3 is predicted to have electron carrier activity and protein disulfide oxidoreductase activity, based on protein domain information; F47B8.3 is expressed in certain ventral cord neurons, pharyngeal cell, hypodermis, intestinal cell, head neurons, and the head muscle.	185896	42	33	9	16.77	4.88	5.36e-07	2.13e-05	0.34	0.29	Y	N
485	F17A9.5	WBGene00017537	F17A9.5	F17A9.5	F17A9.5,F17A9.5	5.14502	3.38356	2.96652	1.78336	N.A.	N.A.	F17A9.5 is predicted to have FMN binding activity and oxidoreductase activity, based on protein domain information.	184611	44	34	10	17.14	4.87	5.65e-07	2.25e-05	0.15	0.45	Y	N
486	arrd-25	WBGene00007296	arrd-25	C04C11.2	C04C11.2,C04C11.2.1,C04C11.2.2	4.82337	5.71386	6.08865	6.71256	N.A.	N.A.	arrd-25 is an ortholog of members of the human ARRDC (Alpha arrestins) family including ARRDC2; tiling array, proteomic, RNA sequencing, and microarray studies indicate that arrd-25 is affected by daf-12, gld-1, let-7, emr-1, lem-2, clk-1, jmjd-1.2, dpy-21, ain-1, slr-2, and daf-2; RNA sequencing and microarray studies indicate that arrd-25 is affected by 1-methylnicotinamide, Cadmium, Chlorpyrif…	181514	44	34	10	17.11	4.86	5.87e-07	2.33e-05	0.26	0.29	N	N
487	F23F12.12	WBGene00017756	F23F12.12	F23F12.12	F23F12.12,F23F12.12	4.98034	1.91132	-0.138314	-1.01976	N.A.	N.A.	Microarray and RNA sequencing studies indicate that F23F12.12 is affected by Hydrogen sulfide, Rotenone, Deoxyglucose, Tunicamycin, Manganese chloride, Atrazine, Quercetin, Humic substances, R24, Paraquat, Dafa#1, and Sirolimus; RNA sequencing studies indicate that F23F12.12 is enriched in the germ line and in the AFD and ASER neurons.	175927	22	19	3	11.98	4.86	5.91e-07	2.34e-05	0.15	0.58	N	Y
488	grd-13	WBGene00001702	grd-13	W05E7.3	W05E7.3,W05E7.3	3.22075	3.77964	1.19566	1.021	intestine,isthmus,metacorpus,procorpus,rectal epithelium,seam cell	adult Ce,L1 larva Ce,L2 larva Ce,L3 larva Ce,L4 larva Ce,larva Ce	grd-13 encodes a hedgehog-like protein, with an N-terminal signal sequence and a C-terminal Ground domain; GRD-13 is expressed in posterior intestine and seam cells; the Ground domain is predicted to form a cysteine-crosslinked protein involved in intercellular signalling, and it has subtle similarity to the N-terminal Hedge domain of HEDGEHOG proteins; GRD-13 is required for normal growth to ful…	3565619	31	29	2	14.28	4.86	5.91e-07	2.34e-05	0.29	0.12	N	N
489	F11E6.3	WBGene00008707	F11E6.3	F11E6.3	F11E6.3,F11E6.3.1,F11E6.3.2	9.8158	8.648	7.85636	7.14227	N.A.	N.A.	Microarray and RNA sequencing studies indicate that F11E6.3 is affected by Diallyl trisulfide, Nicotinic acid, Rotenone, Manganese chloride, D-glucose, Bisphenol A, Cry5B, Cholestanol, Deoxyglucose, Quercetin, Humic substances, and Sirolimus; tiling array, RNA sequencing, and microarray studies indicate that F11E6.3 is enriched in the cephalic sheath cell, germ line, and intestine and in the NSM …	178533	45	33	12	17.29	4.85	6.05e-07	2.38e-05	1.19	0.3	Y	N
490	kcc-1	WBGene00006504	kcc-1	R13A1.2	R13A1.2a,R13A1.2b,R13A1.2c,R13A1.2d,R13A1.2e,R13A1.2:wp237,R13A1.2c,R13A1.2d,R13A1.2e,R13A1.2a,R13A1.2b	4.30039	4.94686	3.50012	2.48094	gon_herm_dtc_A,gon_herm_dtc_P,intestine,pharyngeal muscle cell,tail neuron,ventral nerve cord,vulva	N.A.	kcc-1 is an ortholog of members of the human SLC (Solute carriers) family including SLC12A4; kcc-1 is involved in chloride transport, embryo development, locomotion and potassium ion transport; kcc-1 exhibits potassium ion symporter activity; kcc-1 is expressed in the gon_herm_dtc_P, gon_herm_dtc_A, pharyngeal muscle cell, intestine, ventral nerve cord, vulva, and the tail neurons.	177495	42	32	10	16.68	4.85	6.1e-07	2.4e-05	0.51	0.45	N	N
491	sox-4	WBGene00015716	sox-4	C12D12.5	C12D12.5a,C12D12.5b,C12D12.5:wp179,C12D12.5:wp223,C12D12.5b,C12D12.5a	2.19857	3.27197	1.3539	4.08645	neuron	N.A.	sox-4 is involved in innate immune response; sox-4 is expressed in the nervous system.	182547	40	31	9	16.26	4.85	6.12e-07	2.4e-05	0.98	0.75	Y	Y
492	Y26E6A.3	WBGene00012514	Y26E6A.3	Y26E6A.3	Y26E6A.3,Y26E6A.3	7.05319	3.43686	3.48461	3.01389	N.A.	N.A.	Y26E6A.3 is an ortholog of human C16orf13; RNA sequencing studies indicate that Y26E6A.3 is affected by Rotenone and Manganese chloride; tiling array and RNA sequencing studies indicate that Y26E6A.3 is enriched in the excretory cell, germ line, and amphid sheath cell and in the GABAergic neurons.	3564786	9	9	0	7.58	4.85	6.13e-07	2.4e-05	1.15	0.51	N	N
493	lfi-1	WBGene00022500	lfi-1	ZC8.4	ZC8.4a,ZC8.4b,ZC8.4d,ZC8.4e,ZC8.4b:wp145,ZC8.4c:wp145,ZC8.4b,ZC8.4a.1,ZC8.4a.2,ZC8.4e,ZC8.4d	7.89438	6.20568	5.52572	8.82195	N.A.	N.A.	lfi-1 encodes, by alternative splicing, at least four isoforms of a large coiled-coil protein paralogous to F35D11.11, and possibly orthologous to rootletin (the structural protein comprising ciliary rootlets); LFI-1 is also homologous to the Parascaris univalens Mitotic Antigen, PUMA1; LFI-1 was initially identified in yeast two-hybrid screens for proteins that interact with the coiled-coil prot…	180771	40	29	11	16.25	4.85	6.27e-07	2.45e-05	2.82	0.27	N	N
494	T07D1.2	WBGene00020301	T07D1.2	T07D1.2	T07D1.2,T07D1.2.1,T07D1.2.2	5.93958	3.89534	5.09257	5.57229	E,Ea,Ep	N.A.	T07D1.2 is an ortholog of human RMND5A (required for meiotic nuclear division 5 A) and RMND5B (required for meiotic nuclear division 5 B); T07D1.2 is expressed in the E, Ep, and the Ea.	180548	36	29	7	15.38	4.84	6.35e-07	2.48e-05	0.34	0.25	Y	Y
495	T19D2.1	WBGene00020567	T19D2.1	T19D2.1	T19D2.1,T19D2.1:wp212,T19D2.1	1.43964	2.51103	-0.0756053	-0.677497	rectal epithelium,rectal gland cell	adult Ce,larva Ce	T19D2.1 is an ortholog of human PAPLN (papilin, proteoglycan like sulfated glycoprotein) and members of the ADAMTS (ADAM metallopeptidases with thrombospondin type 1 motif) family including ADAMTS2 and ADAMTSL (ADAMTS like) family including THSD4; T19D2.1 is predicted to have metalloendopeptidase activity, based on protein domain information; T19D2.1 is expressed in the rectal gland cell and the …	180675	31	26	5	14.24	4.84	6.41e-07	2.5e-05	1.33	1.02	Y	N
497	cyp-34A5	WBGene00015040	cyp-34A5	B0213.10	B0213.10,B0213.10	-0.202617	-0.044175	-2.57352	-2.493	N.A.	N.A.	cyp-34A5 is an ortholog of human CYP21A2 (cytochrome P450 family 21 subfamily A member 2) and members of the CYP2 (Cytochrome P4502) family including CYP2E1; cyp-34A5 is predicted to have heme binding activity, iron ion binding activity, and oxidoreductase activity, acting on paired donors, with incorporation or reduction of molecular oxygen, based on protein domain information.	181847	40	34	6	16.19	4.83	6.85e-07	2.66e-05	0.76	0.45	N	N
498	R11D1.3	WBGene00011244	R11D1.3	R11D1.3	R11D1.3,R11D1.3	1.36099	2.01054	0.69698	-4.18886	amphid sheath cell	N.A.	R11D1.3 is expressed in the amphid sheath cell.	187804	45	32	13	17.2	4.83	6.9e-07	2.67e-05	0.52	0.36	N	N
499	Y69E1A.5	WBGene00013477	Y69E1A.5	Y69E1A.5	Y69E1A.5,Y69E1A.5.1,Y69E1A.5.2	4.73511	6.05073	8.44001	5.09001	N.A.	N.A.	Y69E1A.5 is an ortholog of human Pebp1 (phosphatidylethanolamine binding protein 1); RNA sequencing, proteomic, and microarray studies indicate that Y69E1A.5 is affected by Manganese chloride, D-glucose, Nicotine, Chlorpyrifos, Diazinon, and Hydrolyzable Tannins; tiling array, RNA sequencing, and microarray studies indicate that Y69E1A.5 is enriched in the body wall muscle cell, germ line, and mu…	190551	46	36	10	17.37	4.82	7.17e-07	2.77e-05	1.5	0.28	N	N
500	C08H9.15	WBGene00007474	C08H9.15	C08H9.15	C08H9.15,C08H9.15	8.24495	2.85474	3.40269	2.29015	N.A.	N.A.	RNA sequencing and microarray studies indicate that C08H9.15 is affected by eat-2, emr-1, lem-2, daf-2, npr-1, jmjd-3.1, and daf-16; RNA sequencing studies indicate that C08H9.15 is affected by Rotenone; tiling array and RNA sequencing studies indicate that C08H9.15 is enriched in the germline precursor cell, hypodermis, and germ line.	3564883	9	9	0	7.54	4.82	7.2e-07	2.78e-05	0.27	1.47	Y	N
501	cyp-33C3	WBGene00018262	cyp-33C3	F41B5.4	F41B5.4,F41B5.4	2.62356	0.0809694	-2.242	-0.139565	N.A.	N.A.	cyp-33C3 is an ortholog of human RP11-400G3.5 and members of the CYP2 (Cytochrome P4502) family including CYP2C9; cyp-33C3 is predicted to have heme binding activity, iron ion binding activity, and oxidoreductase activity, acting on paired donors, with incorporation or reduction of molecular oxygen, based on protein domain information.	3565571	42	32	10	16.57	4.82	7.25e-07	2.79e-05	0.23	1.13	Y	N
502	gst-8	WBGene00001756	gst-8	F11G11.1	F11G11.1,F11G11.1	-2.49139	0.633626	-4.04437	-3.62729	N.A.	N.A.	gst-8 encodes a predicted glutathione S-transferase.	184364	41	38	3	16.31	4.8	7.86e-07	3.02e-05	0.21	0.26	Y	N
503	F46H5.7	WBGene00018522	F46H5.7	F46H5.7	F46H5.7a,F46H5.7b,F46H5.7c,F46H5.7c,F46H5.7a.1,F46H5.7a.2,F46H5.7b.1,F46H5.7b.2	7.46685	7.01629	8.24796	5.30064	N.A.	N.A.	Microarray, tiling array, and RNA sequencing studies indicate that F46H5.7 is affected by cyc-1, daf-16, aak-2, daf-12, daf-2, glp-1, dpy-21, hlh-30, sir-2.1, ain-1, and dpy-10; RNA sequencing and microarray studies indicate that F46H5.7 is affected by Cry5B, Cadmium, Quercetin, Hydrolyzable Tannins, Humic substances, and Sirolimus; proteomic and RNA sequencing studies indicate that F46H5.7 is en…	180987	45	33	12	17.1	4.8	7.97e-07	3.06e-05	0.72	0.84	N	Y
505	tkt-1	WBGene00008506	tkt-1	F01G10.1	F01G10.1,F01G10.1.1,F01G10.1.2	7.88259	8.17588	6.70244	6.17238	intestine,pharynx,reproductive system,vulva	adult Ce,larva Ce	tkt-1 encodes an ortholog of the human gene TRANSKETOLASE (TKT; OMIM:606781), which when mutated leads to Wernicke-Korsakoff syndrome (OMIM:277730).	177906	45	39	6	17.09	4.79	8.14e-07	3.11e-05	1.56	1.36	Y	Y
506	skr-4	WBGene00004810	skr-4	Y60A3A.18	Y60A3A.18,Y60A3A.18	5.10395	3.94218	-0.419293	0.815404	intestine	N.A.	The skr-4 gene encodes a homolog of Skp1 in S. cerevisiae that has no known function in vivo, since skr-4(RNAi) animals are at least superficially normal.	191762	22	19	3	11.82	4.79	8.21e-07	3.13e-05	0.62	1	N	N
507	F57B10.9	WBGene00019006	spg-20	F57B10.9	F57B10.9,F57B10.9	1.36296	3.73033	3.63653	4.18239	amphid neuron,dorsal nerve cord,head neuron,lateral nerve cord,nerve ring,nervous system,neuron,pharyngeal neuron,phasmid neuron,tail neuron,touch receptor neuron,ventral cord neuron	adult Ce,larva Ce	spg-20 is an ortholog of human SPG20 (spastic paraplegia 20 (Troyer syndrome)); spg-20 is expressed in the nervous system.	172369	44	34	10	16.87	4.79	8.34e-07	3.17e-05	1.28	0	Y	N
508	enol-1	WBGene00011884	enol-1	T21B10.2	T21B10.2a,T21B10.2b,T21B10.2c,T21B10.2c.1,T21B10.2c.2,T21B10.2b.1,T21B10.2b.2,T21B10.2b.3,T21B10.2a.1,T21B10.2a.2,T21B10.2a.3	9.69342	8.64928	9.75008	9.52129	AMsoL,AMsoR,anal depressor muscle,body wall musculature,gon_herm_dtc_A,gon_herm_dtc_P,head,head neuron,intestine,nerve ring,nervous system,pharynx,rectal epithelium,rectal gland cell,reproductive system,spermatheca,tail neuron,uterine muscle,ventral cord neuron,vulva,vulval muscle	adult Ce,larva Ce	enol-1 is orthologous to human ENOLASE 1 (also CRYSTALLIN, TAU; ENO1; OMIM:172430), which when mutated leads to spherocytic red cell enolase deficiency.	174423	44	35	9	16.86	4.79	8.47e-07	3.22e-05	0.34	0.23	Y	N
509	decr-1.1	WBGene00018380	decr-1.1	F43C11.3	F43C11.3,F43C11.3	-1.08775	1.61239	-1.46344	-2.78089	N.A.	N.A.	RNA sequencing and microarray studies indicate that decr-1.1 is affected by Ethanol, Methylmercury hydroxide, Methylmercuric chloride, Rotenone, Manganese chloride, D-glucose, Fluoranthene, Quercetin, Paraquat, Dafa#1, adsorbable organic bromine compounds, Sirolimus, and Ag nanoparticles; tiling array and RNA sequencing studies indicate that decr-1.1 is enriched in the hypodermis and germ line.	185697	35	27	8	14.97	4.78	8.63e-07	3.27e-05	0	0.23	N	N
510	T20B12.7	WBGene00020604	T20B12.7	T20B12.7	T20B12.7,T20B12.7	7.01195	6.19647	6.45377	6.34679	N.A.	N.A.	T20B12.7 is an ortholog of human CIAPIN1 (cytokine induced apoptosis inhibitor 1); T20B12.7 is involved in embryo development, gamete generation and nematode larval development; T20B12.7 is predicted to have iron-sulfur cluster binding activity, based on protein domain information.	176051	36	29	7	15.19	4.78	8.72e-07	3.3e-05	0.41	0.57	Y	N
511	F17E9.2	WBGene00017539	F17E9.2	F17E9.2	F17E9.2,F17E9.2:wp231,F17E9.2	0.54868	-3.73324	-1.49717	-5.02492	N.A.	N.A.	Microarray, tiling array, and RNA sequencing studies indicate that F17E9.2 is affected by atx-3, cyc-1, nhr-114, rsr-2, tatn-1, daf-2, jmjd-3.1, sir-2.1, eri-1, mir-243, his-24, hpl-1, hpl-2, and eat-2; microarray studies indicate that F17E9.2 is affected by Aldicarb, Methylmercuric chloride, Tunicamycin, Atrazine, Humic substances, Colistin, Dafa#1, and Sirolimus.	184618	46	34	12	17.23	4.78	8.75e-07	3.3e-05	0.95	0	N	N
512	skr-3	WBGene00004809	skr-3	F44G3.6	F44G3.6,F44G3.6	6.17178	6.69807	4.81503	4.40782	intestine,pharynx	N.A.	skr-3 encodes a homolog of Skp1 in S. cerevisiae; skr-3 transcripts are upregulated in response to pathogenic bacteria, and skr-3(RNAi) results in enhanced susceptibility to infection.	180081	44	36	8	16.82	4.77	9.03e-07	3.4e-05	0.23	1.83	N	Y
513	M28.10	WBGene00010901	M28.10	M28.10	M28.10,M28.10.1,M28.10.2	2.57283	2.94376	-1.64621	-2.16771	N.A.	N.A.	Microarray, RNA sequencing, and tiling array studies indicate that M28.10 is affected by lin-15B, lin-35, prg-1, clk-1, tdp-1, elt-2, jmjd-3.1, hyl-2, let-418, chd-3, elli-1, dpy-9, dpy-10, osm-7, osm-11, alg-1, spg-7, tbx-2, and eat-2; RNA sequencing, proteomic, and microarray studies indicate that M28.10 is affected by Manganese chloride, Nicotine, Deoxyglucose, Cadmium, Fluoranthene, Chlorpyri…	187463	22	19	3	11.77	4.77	9.08e-07	3.41e-05	0.34	1.13	N	Y
514	ist-1	WBGene00002163	ist-1	C54D1.3	C54D1.3b,C54D1.3c,C54D1.3:wp128,C54D1.3b,C54D1.3c	2.26999	1.97257	2.99372	4.88928	N.A.	N.A.	ist-1 encodes a pleckstrin homology (PH) and phosphotyrosine binding (PTB) domain-containing insulin receptor substrate (IRS) homolog that negatively regulates lifespan and dauer development; IST-1 potentiates insulin-like signaling, although it is not absolutely required for such signaling under most conditions; in addition to acting through the AGE-1/PI3K branch of the insulin-like signaling pa…	180978	36	27	9	15.16	4.77	9.08e-07	3.41e-05	2.36	0.75	N	N
515	ugt-39	WBGene00017329	ugt-39	F10D2.2	F10D2.2a,F10D2.2b,F10D2.2a:wp142,F10D2.2a,F10D2.2b	0.312678	1.22195	-2.84231	-4.57604	N.A.	N.A.	ugt-39 is an ortholog of human UGT3A2 (UDP glycosyltransferase family 3 member A2) and UGT3A1 (UDP glycosyltransferase family 3 member A1); ugt-39 is predicted to have transferase activity, transferring hexosyl groups, based on protein domain information.	3564933	44	35	9	16.8	4.77	9.35e-07	3.5e-05	0.3	0.29	N	N
516	K06A4.7	WBGene00010597	K06A4.7	K06A4.7	K06A4.7,K06A4.7	1.30983	4.57539	1.49652	2.31834	N.A.	N.A.	Microarray and RNA sequencing studies indicate that K06A4.7 is affected by cyc-1, isp-1, age-1, nhr-8, prg-1, elt-2, daf-2, npr-1, cco-1, jmjd-1.2, hyl-2, hsf-1, rbr-2, let-418, chd-3, lin-28, skn-1, alg-1, and ain-2; RNA sequencing and microarray studies indicate that K06A4.7 is affected by 1-methylnicotinamide, Methylmercuric chloride, Rotenone, and Colistin; RNA sequencing and microarray studi…	259638	9	9	0	7.44	4.76	9.71e-07	3.63e-05	0.47	1.29	Y	Y
517	C54F6.5	WBGene00016923	C54F6.5	C54F6.5	C54F6.5,C54F6.5:wp154,C54F6.5:wp236,C54F6.5	0.564431	4.03677	4.93344	-0.892264	N.A.	N.A.	Microarray studies indicate that C54F6.5 is affected by Hydrogen sulfide, Mercuric Chloride, Tunicamycin, Chlorpyrifos, Diazinon, single-walled carbon nanotubes, Dafa#1, and Sirolimus; tiling array, RNA sequencing, and microarray studies indicate that C54F6.5 is enriched in the germ line, muscle cell, and body wall musculature and in the dopaminergic neurons.	179137	39	30	9	15.74	4.76	9.91e-07	3.7e-05	1.34	1.13	Y	N
518	chil-7	WBGene00007472	chil-7	C08H9.13	C08H9.13,C08H9.13:wp210,C08H9.13	-1.09154	-4.27442	-4.21874	-3.46536	N.A.	N.A.	chil-7 is an ortholog of human OVGP1 (oviductal glycoprotein 1) and members of the CHI (Chitinases) family including CHI3L1; chil-7 is predicted to have chitin binding activity, based on protein domain information.	182437	30	26	4	13.74	4.75	1.01e-06	3.75e-05	0.41	1.29	Y	N
519	add-2	WBGene00000073	add-2	F57F5.4	F57F5.4a,F57F5.4b,F57F5.4a.1,F57F5.4a.2,F57F5.4a.3,F57F5.4b	4.19553	1.78065	1.80761	2.5783	N.A.	N.A.	add-2 encodes a protein containing an alpha-adducin-like head domain that while highly similar in sequence to the head domain of vertebrate and Drosophila adducins, atypically resides at the C-, rather than N-, terminus of the protein; by homology, ADD-2 is predicted to be a cell membrane-associated cytoskeletal protein that mediates cytoskeletal rearrangements in response to activation of signal…	179647	13	11	2	8.96	4.75	1.01e-06	3.77e-05	0.68	1	Y	N
520	fbxa-107	WBGene00012564	fbxa-107	Y37H2A.4	Y37H2A.4,Y37H2A.4	2.22033	0.22813	-1.04447	-1.45824	N.A.	N.A.	This gene encodes a protein containing an F-box, a motif predicted to mediate protein-protein interactions either with homologs of yeast Skp-1p or with other proteins; this gene's encoded protein also contains an FTH/DUF38 motif, which may also mediate protein-protein interaction.	189628	22	17	5	11.72	4.75	1.02e-06	3.77e-05	0.3	0.29	N	N
521	ZK909.6	WBGene00014150	ZK909.6	ZK909.6	ZK909.6,ZK909.6:wp156,ZK909.6	3.57319	4.20333	5.20952	4.69125	N.A.	N.A.	Tiling array, RNA sequencing, and microarray studies indicate that ZK909.6 is affected by hpl-2, rsr-2, emr-1, lem-2, bar-1, hlh-30, tdp-1, daf-2, jmjd-3.1, hsf-1, and alg-1; RNA sequencing studies indicate that ZK909.6 is affected by Rotenone; tiling array and RNA sequencing studies indicate that ZK909.6 is enriched in the hypodermis, germ line, and muscle cell and in the dopaminergic, AFD, ASER…	3565097	9	9	0	7.42	4.74	1.06e-06	3.92e-05	0.15	1.29	Y	N
522	ugt-23	WBGene00007650	ugt-23	C17G1.3	C17G1.3a,C17G1.3b,C17G1.3a,C17G1.3b.1,C17G1.3b.2	0.0954794	3.21489	-1.91275	-0.48995	N.A.	N.A.	ugt-23 is an ortholog of human UGT3A2 (UDP glycosyltransferase family 3 member A2) and UGT3A1 (UDP glycosyltransferase family 3 member A1); ugt-23 is involved in gastrulation; ugt-23 is predicted to have transferase activity, transferring hexosyl groups, based on protein domain information.	181205	38	31	7	15.47	4.73	1.1e-06	4.07e-05	0.97	2	Y	Y
523	lys-8	WBGene00003097	lys-8	C17G10.5	C17G10.5,C17G10.5.1,C17G10.5.2	4.47228	7.6852	2.73488	2.55656	g1AL,g1AR,g1P,g2L,g2R,head neuron,intestine,tail neuron	adult Ce,L1 larva Ce,L2 larva Ce,L3 larva Ce,L4 larva Ce	lys-8 encodes a putative lysozyme required for normal longevity, probably because it prevents killing of C. elegans by bacteria infecting its gut; LYS-8 is expressed in intestine up to the terminal bulb of the pharynx, as well as in g1 and g2 pharyngeal gland cells; LYS-8 expression is induced by infection with Serratia marcescens, Pseudomonas aeruginosa, or (weakly) by Microbacterium nematophilu…	173944	46	34	12	17.05	4.73	1.14e-06	4.22e-05	0.75	2.15	Y	Y
524	F41C6.7	WBGene00018280	F41C6.7	F41C6.7	F41C6.7,F41C6.7:wp108,F41C6.7	-2.81298	1.08865	-4.89986	-3.38362	N.A.	N.A.	F41C6.7 is predicted to have cation transmembrane transporter activity, based on protein domain information.	185601	33	31	2	14.36	4.73	1.15e-06	4.22e-05	0.61	2.93	Y	Y
525	sams-5	WBGene00006416	sams-5	T13A10.11	T13A10.11a,T13A10.11b:wp240,T13A10.11b,T13A10.11a.1,T13A10.11a.2	2.63942	3.70097	3.75607	-1.92668	body region,excretory gland cell,gonadal sheath cell,intestine,MI neuron,nervous system,pharyngeal neuron,rectal gland cell,reproductive system,spermatheca	adult Ce,larva Ce	sams-5 is an ortholog of human MAT1A (methionine adenosyltransferase 1A) and MAT2A (methionine adenosyltransferase 2A); sams-5 is involved in embryo development, hermaphrodite genitalia development, locomotion, nematode larval development, positive regulation of growth and secretion by cell; sams-5 is predicted to have ATP binding activity and methionine adenosyltransferase activity, based on pro…	177389	45	32	13	16.84	4.72	1.16e-06	4.25e-05	1.19	0.98	N	N
527	cpz-2	WBGene00000789	cpz-2	M04G12.2	M04G12.2,M04G12.2	3.12742	6.46156	0.104942	1.13094	N.A.	N.A.	cpz-2 is an ortholog of human CTSZ (cathepsin Z); cpz-2 is predicted to have cysteine-type peptidase activity, based on protein domain information.	179818	45	37	8	16.84	4.72	1.17e-06	4.28e-05	0.69	1	N	Y
528	F10F2.2	WBGene00008654	F10F2.2	F10F2.2	F10F2.2,F10F2.2:wp209,F10F2.2	1.58562	4.4964	0.277933	1.60044	intestinal cell	adult Ce,L1 larva Ce,L2 larva Ce,L3 larva Ce,L4 larva Ce	F10F2.2 is an ortholog of human PFAS (phosphoribosylformylglycinamidine synthase); F10F2.2 is predicted to have phosphoribosylformylglycinamidine synthase activity, based on protein domain information; F10F2.2 is expressed in the intestinal cell.	175608	44	32	12	16.63	4.72	1.18e-06	4.32e-05	0.15	2.28	N	Y
529	C55A6.4	WBGene00008333	C55A6.4	C55A6.4	C55A6.4,C55A6.4	4.4489	1.95803	1.3282	-1.69399	N.A.	N.A.	Microarray and RNA sequencing studies indicate that C55A6.4 is affected by Tunicamycin, Bisphenol A, Juglone, Acrylamide, Diazinon, Cry5B, Humic substances, Paraquat, and Ag nanoparticles; tiling array, RNA sequencing, and microarray studies indicate that C55A6.4 is enriched in the hypodermis, germ line, male, and intestine.	183833	39	29	10	15.63	4.72	1.18e-06	4.32e-05	1.12	0.61	N	N
530	mak-1	WBGene00010681	mak-1	K08F8.1	K08F8.1a,K08F8.1b,K08F8.1c,K08F8.1d,K08F8.1e,K08F8.1b.1,K08F8.1b.2,K08F8.1b.3,K08F8.1a.1,K08F8.1a.2,K08F8.1a.3,K08F8.1d.1,K08F8.1d.2,K08F8.1c.1,K08F8.1c.2,K08F8.1c.3,K08F8.1c.4,K08F8.1e.1,K08F8.1e.2,K08F8.1e.3,K08F8.1e.4,K08F8.1e.5,K08F8.1e.6	9.43672	5.60957	6.86948	5.36731	body wall muscle cell,body wall musculature,excretory cell,hypodermis,intestine,pharynx,tail	adult Ce,larva Ce	mak-1 is an ortholog of human MAPKAPK2 (mitogen-activated protein kinase-activated protein kinase 2) and MAPKAPK3 (mitogen-activated protein kinase-activated protein kinase 3); mak-1 is involved in embryo development; mak-1 is predicted to have ATP binding activity and protein kinase activity, based on protein domain information; mak-1 is expressed in the pharynx, hypodermis, tail, intestine, exc…	174398	41	31	10	16.03	4.72	1.19e-06	4.34e-05	1.8	1.13	N	N
531	F40A3.3	WBGene00018218	F40A3.3	F40A3.3	F40A3.3a,F40A3.3b,F40A3.3c,F40A3.3:wp142,F40A3.3c,F40A3.3a,F40A3.3b	5.99502	5.96465	6.25892	5.56484	N.A.	N.A.	F40A3.3 is an ortholog of human Pebp1 (phosphatidylethanolamine binding protein 1); F40A3.3 is localized to the mitochondrion.	179168	46	37	9	17	4.71	1.21e-06	4.41e-05	0.88	0.51	Y	N
532	glb-22	WBGene00011251	glb-22	R11H6.3	R11H6.3a,R11H6.3b,R11H6.3c,R11H6.3:wp230,R11H6.3c,R11H6.3a,R11H6.3b	1.45371	1.9166	1.01059	6.42651	head neuron,lateral nerve cord,tail neuron,ventral cord neuron,ventral nerve cord	N.A.	glb-22 encodes a globin with no obvious function in mass RNAi assays.	187832	39	30	9	15.61	4.71	1.23e-06	4.44e-05	0.26	1	N	N
534	tyr-2	WBGene00010661	tyr-2	K08E3.1	K08E3.1,K08E3.1	5.10956	4.97376	2.1377	3.06831	hypodermis,uterine muscle	N.A.	tyr-2 is an ortholog of human TYR (tyrosinase), TYRP1 (tyrosinase related protein 1) and DCT (dopachrome tautomerase); tyr-2 is involved in apoptotic process and cellular metabolic process; tyr-2 exhibits dopachrome isomerase activity and is predicted to have oxidoreductase activity, based on protein domain information; tyr-2 is expressed in the uterine muscle and the hypodermis.	176810	42	34	8	16.21	4.71	1.23e-06	4.43e-05	1.09	0.36	N	N
535	ins-10	WBGene00002093	ins-10	T08G5.12	T08G5.12,T08G5.12	-2.09187	0.883181	0.86806	4.87765	coelomocyte,head muscle,I5 neuron,intestine,M4 neuron,MC neuron,motor neuron,nerve ring neuron,pharyngeal neuron,rectum,RIS,somatic neuron,tail neuron,ventral nerve cord,vulva	larva Ce	ins-10 encodes an insulin-like peptide.	3565431	6	6	0	6	4.71	1.23e-06	4.45e-05	0	1.84	N	N
536	F45E1.5	WBGene00018466	F45E1.5	F45E1.5	F45E1.5,F45E1.5:wp142,F45E1.5	-0.630395	0.2391	1.532	2.82577	N.A.	N.A.	F45E1.5 encodes a protein containing a region of similarity to carboxypeptidase A and a C-terminal coiled-coil region; phylogenetic analyses suggest that the product of F45E1.5 is a unique C. elegans EFhd (EF-hand) isoform that diverged from an efhd/aif1 precursor gene present in Bilateria.	185794	38	33	5	15.39	4.71	1.24e-06	4.45e-05	0.8	0.51	N	N
537	let-767	WBGene00002891	let-767	C56G2.6	C56G2.6a,C56G2.6b,C56G2.6c,C56G2.6b,C56G2.6a.1,C56G2.6a.2,C56G2.6c	6.0539	7.24327	5.38943	4.86043	hypodermis,intestine,pharynx	adult Ce,adult hermaphrodite Ce,embryo Ce,L1 larva Ce,L2 larva Ce,L3 larva Ce,L4 larva Ce	let-767 encodes a steroid dehydrogenase required for embryogenesis, molting, and female reproduction; LET-767 is orthologous to human HSD17B3 (OMIM:605573, mutated in pseudohermaphroditism), HSD17B12 (OMIM:609574), and HSDL1; in vitro, LET-767 catalytically converts androstenedione and estrone into testosterone and estradiol, and in vivo probably catalyzes the synthesis of endogeneous steroid hor…	175895	44	32	12	16.6	4.71	1.25e-06	4.48e-05	0.83	1.48	Y	Y
538	lec-5	WBGene00002268	lec-5	ZK1248.16	ZK1248.16,ZK1248.16.1,ZK1248.16.2	6.25442	8.0221	9.77955	4.46296	N.A.	N.A.	lec-5 is an ortholog of human LGALS4 (galectin 4); lec-5 is predicted to have carbohydrate binding activity, based on protein domain information; lec-5 is localized to the membrane raft.	173992	44	30	14	16.59	4.71	1.26e-06	4.51e-05	1.22	0	Y	N
539	fbxc-43	WBGene00045297	fbxc-43	C16A11.9	C16A11.9,C16A11.9	-3.55084	0.308546	-1.71287	-1.67242	N.A.	N.A.	Microarray, RNA sequencing, and tiling array studies indicate that fbxc-43 is affected by nhr-114, eat-2, drh-3, csr-1, daf-2, npr-1, jmjd-3.1, hsf-1, rbr-2, mes-2, dpy-21, daf-16, rde-4, aak-2, tax-6, isp-1, and nuo-6; microarray studies indicate that fbxc-43 is affected by Hydrolyzable Tannins, Paraquat, and Sirolimus; RNA sequencing studies indicate that fbxc-43 is enriched in the germ line.	6418620	22	20	2	11.61	4.71	1.26e-06	4.52e-05	1.54	0	N	N
540	srg-32	WBGene00005189	srg-32	T21C9.7	T21C9.7,T21C9.7:wp93,T21C9.7	-3.45467	-3.50025	-5.00759	-0.514654	N.A.	N.A.	srg-32 is predicted to have transmembrane signaling receptor activity, based on protein domain information.	188687	43	35	8	16.38	4.7	1.28e-06	4.57e-05	1.02	0.66	N	N
541	F17B5.1	WBGene00008905	F17B5.1	F17B5.1	F17B5.1a,F17B5.1b,F17B5.1a	-5.51071	1.33814	-5.40328	-1.96565	N.A.	N.A.	F17B5.1 is an ortholog of human NXNL2 (nucleoredoxin-like 2) and NXN (nucleoredoxin); RNA sequencing and microarray studies indicate that F17B5.1 is affected by Ethanol, Tunicamycin, Progesterone, Resveratrol, Chlorpyrifos, Cry5B, Quercetin, and single-walled carbon nanotubes.	173182	37	27	10	15.15	4.7	1.29e-06	4.6e-05	2.55	0.46	Y	Y
542	R08E5.1	WBGene00019961	R08E5.1	R08E5.1	R08E5.1a,R08E5.1b,R08E5.1:wp188,R08E5.1:wp245,R08E5.1b.1,R08E5.1b.2,R08E5.1a	4.69958	-0.861974	-0.0656283	0.0348296	N.A.	N.A.	Microarray and RNA sequencing studies indicate that R08E5.1 is affected by Aldicarb, Hydrogen sulfide, Methylmercuric chloride, Rotenone, Diazinon, and Colistin.	178794	35	26	9	14.7	4.69	1.35e-06	4.8e-05	0.21	0	Y	N
543	gei-15	WBGene00001572	gei-15	M03A8.4	M03A8.4,M03A8.4:wp104,M03A8.4:wp221,M03A8.4	4.01626	5.27689	7.76776	3.25739	N.A.	N.A.	gei-15 is involved in determination of adult lifespan; gei-15 is localized to the cell junction and the striated muscle dense body.	24104769	42	32	10	16.15	4.69	1.36e-06	4.82e-05	0.29	0.13	N	N
544	ZK1055.6	WBGene00022847	ZK1055.6	ZK1055.6	ZK1055.6a,ZK1055.6b,ZK1055.6c,ZK1055.6c,ZK1055.6b,ZK1055.6a	2.89445	3.82785	2.00773	2.35957	N.A.	N.A.	Microarray studies indicate that ZK1055.6 is affected by Aldicarb, Methylmercuric chloride, Resveratrol, Cry5B, Humic substances, and Sirolimus; microarray, tiling array, and RNA sequencing studies indicate that ZK1055.6 is enriched in the coelomocytes, germ line, Z4, and Z1 and in the PVD, OLL, AVA, and AFD neurons.	179050	42	32	10	16.14	4.69	1.37e-06	4.87e-05	1.12	1.46	N	N
545	best-14	WBGene00009340	best-14	F32G8.4	F32G8.4,F32G8.4:wp137,F32G8.4	5.62213	4.3426	2.69858	2.10959	N.A.	N.A.	best-14 is an ortholog of human Best4 (bestrophin 4), Best3 (bestrophin 3), Best2 (bestrophin 2) and Best1 (bestrophin 1); RNA sequencing and microarray studies indicate that best-14 is affected by D-glucose, Resveratrol, Humic substances, single-walled carbon nanotubes, Paraquat, and Sirolimus; tiling array and RNA sequencing studies indicate that best-14 is enriched in the hypodermis and germ l…	179471	43	32	11	16.31	4.68	1.42e-06	5.04e-05	0.87	1.23	Y	N
546	Y22D7AR.10	WBGene00021263	Y22D7AR.10	Y22D7AR.10	Y22D7AR.10,Y22D7AR.10	6.5726	5.62768	7.96994	3.60686	N.A.	N.A.	Microarray and RNA sequencing studies indicate that Y22D7AR.10 is affected by Aldicarb, Hydrogen sulfide, Ethanol, 1-methylnicotinamide, Rotenone, Tunicamycin, Mianserin, and Chlorpyrifos; proteomic and chronogram analysis studies indicate that Y22D7AR.10 is enriched in the germ line and intestine.	175321	9	8	1	7.32	4.68	1.43e-06	5.06e-05	0.15	0.23	N	N
547	elo-2	WBGene00001240	elo-2	F11E6.5	F11E6.5,F11E6.5	6.24637	6.38588	3.91721	4.00838	intestine,pharyngeal muscle cell,tail,uterus,ventral nerve cord	adult Ce,fully-elongated embryo Ce,L1 larva Ce,L2 larva Ce,L3 larva Ce,L4 larva Ce	elo-2 encodes a palmitic acid elongase, homologous to polyunsaturated fatty acid (PUFA) elongases such as ELO-1, that is required for normally rapid growth, normally large body size, fertility, and for the quantitative regulation of the ultradian defecation rhythm; the joint action of ELO-2 with ELO-1 is strongly required for 20-carbon PUFA production and for general viability; loss of el-2 activ…	178532	46	34	12	16.87	4.67	1.47e-06	5.19e-05	0.61	0.91	Y	Y
548	F13D12.3	WBGene00008739	F13D12.3	F13D12.3	F13D12.3,F13D12.3	7.05171	3.67598	3.66402	1.45448	head,rectal epithelium	N.A.	F13D12.3 is expressed in the head and the rectal epithelium.	174797	46	39	7	16.87	4.67	1.47e-06	5.18e-05	0.12	0.36	Y	N
550	F20D1.3	WBGene00008975	F20D1.3	F20D1.3	F20D1.3,F20D1.3:wp83,F20D1.3	8.05866	6.39982	6.88496	6.80974	anterior gonad arm	N.A.	F20D1.3 is expressed in the anterior gonad arm.	181593	46	36	10	16.85	4.67	1.51e-06	5.3e-05	0.27	0.61	Y	N
551	ketn-1	WBGene00004130	ketn-1	F54E2.3	F54E2.3a,F54E2.3b,F54E2.3c,F54E2.3d,F54E2.3e,F54E2.3f,F54E2.3g,F54E2.3h,F54E2.3i,F54E2.3j,F54E2.3k,F54E2.3l,F54E2.3a:wp143,F54E2.3a:wp176,F54E2.3a:wp240,F54E2.3b:wp240,F54E2.3c:wp240,F54E2.3d:wp240,F54E2.3b,F54E2.3a,F54E2.3e,F54E2.3k,F54E2.3f,F54E2.3j,F54E2.3h,F54E2.3c,F54E2.3i,F54E2.3g,F54E2.3d,F54E2.3l	5.1734	7.36693	8.61602	4.26637	anal depressor muscle,body wall musculature,male gonad,muscle cell,pharyngeal muscle cell,pharynx,reproductive system,vulva,vulval muscle	adult Ce,larva Ce,postembryonic Ce	ketn-1 encodes an ortholog of kettin (in D. melanogaster, SALLIMUS), an invertebrate isoform or paralog of titin; ketn-1 is transcriptionally upregulated two-fold by hypoxia, requires both HIF-1 and VHL-1 for this induction, and contains three predicted HIF-1 binding sites in its predicted 5' regulatory region; ketn-1's induction by hypoxia correlates with upregulation of other genes required for…	178740	39	30	9	15.47	4.67	1.51e-06	5.3e-05	1.15	0.12	N	N
552	gpa-12	WBGene00001674	gpa-12	F18G5.3	F18G5.3,F18G5.3	3.24279	3.09414	0.363481	-0.689083	excretory cell,head neuron,hypodermis,interneuron,intestine,muscle cell,nerve ring,pharyngeal muscle cell,pharynx,tail neuron,ventral cord neuron	adult Ce,embryo Ce,L1 larva Ce,L2 larva Ce,L3 larva Ce,L4 larva Ce	gpa-12 encodes a member of the G protein alpha subunit family of heterotrimeric GTPases that is orthologous to members of the mammalian Galpha G12/G13 family; GPA-12 activity is required for antifungal innate immunity and genetic analyses indicate that GPA-12 functions upstream of phospholipase Cs PLC-3 and EGL-8 as well as the TPA-1 protein kinase C in this process; genetic analyses also suggest…	181157	38	30	8	15.24	4.66	1.57e-06	5.48e-05	2	0	Y	N
553	E04F6.6	WBGene00017126	E04F6.6	E04F6.6	E04F6.6,E04F6.6	3.10573	2.63745	0.488802	0.610541	N.A.	N.A.	E04F6.6 is involved in lipid storage and nematode larval development.	174182	36	28	8	14.8	4.66	1.61e-06	5.63e-05	0.63	0.26	Y	N
554	ccch-1	WBGene00009532	ccch-1	F38B7.1	F38B7.1a,F38B7.1b,F38B7.1a:wp87,F38B7.1b:wp87,F38B7.1a,F38B7.1b	7.23387	5.07584	5.93444	4.94334	body wall musculature,cholinergic neuron,GABAergic neuron,head neuron,intestine,pharynx,reproductive system,somatic neuron,tail neuron,vulval muscle	adult Ce,larva Ce	ccch-1 encodes a CCCH tandem zinc finger (TZF) protein; based upon its sequence similarity to human tristetraprolin and ERF-2 the product of F38B7.1 is predicted to function as an RNA-binding protein that specifically binds to UAUU repeats.	179584	44	35	9	16.42	4.65	1.62e-06	5.64e-05	0.31	0.36	Y	N
555	Y11D7A.10	WBGene00012434	Y11D7A.10	Y11D7A.10	Y11D7A.10a,Y11D7A.10c,Y11D7A.10d,Y11D7A.10b:wp242,Y11D7A.10c,Y11D7A.10a.1,Y11D7A.10a.2,Y11D7A.10d	7.75082	5.29194	6.40065	5.83663	N.A.	N.A.	Microarray and RNA sequencing studies indicate that Y11D7A.10 is affected by clk-1, cyc-1, isp-1, nhr-114, eat-2, htz-1, npr-1, jmjd-3.1, jmjd-1.2, sir-2.1, and nuo-6; microarray and RNA sequencing studies indicate that Y11D7A.10 is affected by Hydrogen sulfide, D-glucose, Chlorpyrifos, and Diazinon; RNA sequencing and microarray studies indicate that Y11D7A.10 is enriched in the germ line, intes…	177747	46	38	8	16.8	4.65	1.62e-06	5.64e-05	1.47	0	Y	N
556	gsy-1	WBGene00001793	gsy-1	Y46G5A.31	Y46G5A.31,Y46G5A.31	5.99707	5.73978	6.5893	5.95104	N.A.	N.A.	gsy-1 is orthologous to the human gene GLYCOGEN SYNTHASE 1 (GYS1; OMIM:138570); deficiencies of GYS1 may be associated with susceptibility to type 2 diabetes.	174924	38	31	7	15.21	4.65	1.63e-06	5.67e-05	0.46	1.29	Y	N
557	gsnl-1	WBGene00010593	gsnl-1	K06A4.3	K06A4.3,K06A4.3	4.10123	5.19001	7.25526	3.02066	anal depressor muscle,body wall musculature,hypodermis,mu_int_L,mu_int_R,reproductive system,vulval muscle	adult Ce,larva Ce	gsnl-1 encodes one of three C. elegans gelsolin-related proteins; GSNL-1 contains four gelsolin-like (G) domains; GSNL-1 is predicted to function in vivo as an actin regulatory protein and in vitro, demonstrates actin filament severing activity; GSNL-1 also exhibits calcium-dependent capping of the barbed ends of actin filaments and stays bound to the side of actin filaments; GSNL-1 additionally …	179328	36	26	10	14.78	4.65	1.67e-06	5.78e-05	1	0	N	N
558	acs-3	WBGene00020343	acs-3	T08B1.6	T08B1.6,T08B1.6	5.0117	2.65954	1.17805	1.4384	excretory cell,head,intestine,seam cell,tail,vulva	adult Ce,embryo Ce,L1 larva Ce,L2 larva Ce,L3 larva Ce,L4 larva Ce	acs-3 is an ortholog of human ACSL5 (acyl-CoA synthetase long-chain family member 5); acs-3 is involved in defense response and embryo development; acs-3 is predicted to have catalytic activity, based on protein domain information; acs-3 is expressed in the head, tail, seam cell, intestine, excretory cell, and the vulva.	178677	38	28	10	15.19	4.65	1.69e-06	5.83e-05	1.74	0	N	N
559	C04E12.6	WBGene00015436	C04E12.6	C04E12.6	C04E12.6:wp252	-2.58689	-0.83861	-2.70519	3.12703	N.A.	N.A.	C04E12.6 is an ortholog of human PGPEP1L (pyroglutamyl-peptidase I-like) and PGPEP1 (pyroglutamyl-peptidase I); microarray studies indicate that C04E12.6 is affected by cyc-1, sma-2, sma-4, lin-35, ubc-9, clk-1, sir-2.1, and rrf-2; microarray studies indicate that C04E12.6 is affected by Tunicamycin, Resveratrol, and Sirolimus.	182211	31	24	7	13.65	4.64	1.78e-06	6.13e-05	0.66	0.82	N	N
560	acs-19	WBGene00007969	acs-19	C36A4.9	C36A4.9a,C36A4.9b,C36A4.9a.1,C36A4.9a.2,C36A4.9b	7.65588	6.04485	6.36671	6.777	dorsal nerve cord,gonadal sheath cell,head neuron,hypodermis,intestine,nerve ring,nervous system,neuron	adult Ce,L1 larva Ce,L2 larva Ce,L3 larva Ce,L4 larva Ce,larva Ce	acs-19 is an ortholog of human ACSS2 (acyl-CoA synthetase short-chain family member 2); acs-19 is involved in lipid storage; acs-19 is predicted to have AMP binding activity and acetate-CoA ligase activity, based on protein domain information; acs-19 is expressed in the hypodermis, nervous system, and the intestine.	175500	45	31	14	16.52	4.63	1.82e-06	6.28e-05	0.29	1.4	Y	N
561	T28A11.2	WBGene00020869	T28A11.2	T28A11.2	T28A11.2,T28A11.2:wp175,T28A11.2a:wp251,T28A11.2	0.78943	4.39352	5.82615	1.45511	N.A.	N.A.	Microarray, tiling array, and RNA sequencing studies indicate that T28A11.2 is affected by hlh-30, daf-16, sma-2, sma-4, tdp-1, glp-1, hpk-1, npr-1, jmjd-3.1, jmjd-1.2, hyl-2, hsf-1, rbr-2, elli-1, sir-2.1, slr-2, dpy-9, and nuo-6; RNA sequencing and microarray studies indicate that T28A11.2 is affected by 1-methylnicotinamide, Rotenone, Resveratrol, Cry5B, Colistin, and Sirolimus; tiling array, …	189009	42	33	9	15.94	4.63	1.83e-06	6.29e-05	0	0.23	N	N
562	B0238.13	WBGene00015077	B0238.13	B0238.13	B0238.13:wp248	-5.17491	-4.33226	-2.58255	-1.90666	N.A.	N.A.	Microarray studies indicate that B0238.13 is affected by Tryptophan, Fluoranthene, R24, single-walled carbon nanotubes, Colistin, Allantoin, and Sirolimus.	178913	33	28	5	14.06	4.62	1.89e-06	6.49e-05	0.75	0.75	N	N
563	gpd-4	WBGene00001686	gpd-4	F33H1.2	F33H1.2,F33H1.2.1,F33H1.2.2	3.45678	3.92567	3.21113	2.55364	germ line	adult Ce,embryo Ce,L1 larva Ce,L2 larva Ce,L3 larva Ce,L4 larva Ce	gpd-4 encodes one of four C. elegans glyceraldehyde-3-phosphate dehydrogenases (GAPDHs); by homology, GPD-4 is predicted to reversibly catalyze the oxidation and phosphorylation of glyceraldehyde-3-phosphate to 1,3-diphosphoglycerate during glycolysis; GPD-4 is required for embryonic and larval development; in C. elegans, GPD-4 and GPD-1 constitute the minor GAPDH isoenzymes and are expressed pri…	174578	37	31	6	14.89	4.62	1.94e-06	6.64e-05	0.58	0.46	Y	N
565	lec-2	WBGene00002265	lec-2	F52H3.7	F52H3.7a,F52H3.7b,F52H3.7a:wp92,F52H3.7b.1,F52H3.7b.2,F52H3.7a.1,F52H3.7a.2	9.44109	7.47674	9.35239	8.87745	N.A.	N.A.	lec-2 encodes a 'tandem repeat' type galectin (beta-galactosyl-binding lectin) containing two, tandemly arranged carbohydrate recognition domains; by homology, LEC-2 may play roles in cell adhesion and aggregation, proliferation, or programmed cell death.	174560	22	19	3	11.36	4.6	2.09e-06	7.13e-05	0	0.23	Y	N
566	atic-1	WBGene00016957	atic-1	C55F2.1	C55F2.1a,C55F2.1b,C55F2.1c,C55F2.1a:wp96,C55F2.1a:wp241,C55F2.1b:wp82,C55F2.1b:wp134,C55F2.1c:wp241,C55F2.1b,C55F2.1c,C55F2.1a	4.31441	4.72823	4.15256	5.94589	N.A.	N.A.	atic-1 is an ortholog of human ATIC (5-aminoimidazole-4-carboxamide ribonucleotide formyltransferase/IMP cyclohydrolase); atic-1 is involved in reproduction; atic-1 is predicted to have IMP cyclohydrolase activity and phosphoribosylaminoimidazolecarboxamide formyltransferase activity, based on protein domain information.	177576	45	33	12	16.43	4.6	2.09e-06	7.12e-05	0.26	0.49	N	N
567	ZC443.1	WBGene00013896	ZC443.1	ZC443.1	ZC443.1,ZC443.1:wp51,ZC443.1	3.39098	2.67084	3.51139	4.72957	N.A.	N.A.	ZC443.1 is an ortholog of human AKR1E2 (aldo-keto reductase family 1 member E2), AKR1B15 (aldo-keto reductase family 1 member B15) and AKR1B10 (aldo-keto reductase family 1 member B10); ZC443.1 is predicted to have oxidoreductase activity, based on protein domain information.	179756	27	22	5	12.59	4.59	2.22e-06	7.55e-05	0	0	N	N
569	col-98	WBGene00000673	col-98	F14F7.1	F14F7.1,F14F7.1	8.47552	6.81081	6.99522	6.11901	N.A.	N.A.	col-98 is an ortholog of human COL26A1 (collagen type XXVI alpha 1 chain) and members of the COL (Collagens) family including COL9A1; col-98 is involved in body morphogenesis and locomotion; col-98 is a structural constituent of cuticle, based on protein domain information.	176724	41	30	11	15.56	4.57	2.41e-06	8.17e-05	1.17	0	Y	N
570	F45D3.3	WBGene00009723	F45D3.3	F45D3.3	F45D3.3,F45D3.3	9.02779	4.29689	3.80921	2.97163	N.A.	N.A.	Microarray, tiling array, and RNA sequencing studies indicate that F45D3.3 is affected by alg-1, hpl-2, pgrn-1, daf-2, tcer-1, dop-1, hsf-1, let-418, chd-3, sir-2.1, ain-2, spr-5, mir-243, hcf-1, and tdp-1; RNA sequencing and microarray studies indicate that F45D3.3 is affected by Ethanol, Rotenone, Bisphenol A, Cry5B, Humic substances, Paraquat, and Sirolimus; tiling array, RNA sequencing, and m…	179717	45	37	8	16.32	4.57	2.42e-06	8.18e-05	0.55	0.87	Y	N
571	AC3.5	WBGene00007071	AC3.5	AC3.5	AC3.5a,AC3.5b,AC3.5:wp119,AC3.5a.1,AC3.5a.2,AC3.5b	5.77112	4.73112	2.99972	2.00001	N.A.	N.A.	AC3.5 is an ortholog of human ERAP1 (endoplasmic reticulum aminopeptidase 1) and members of the M1 metallopeptidases family including NPEPPS; AC3.5 is predicted to have metallopeptidase activity and zinc ion binding activity, based on protein domain information.	179447	41	32	9	15.55	4.57	2.43e-06	8.22e-05	0.68	0.38	N	N
572	F01D5.1	WBGene00008492	F01D5.1	F01D5.1	F01D5.1,F01D5.1	-0.80197	4.23556	-3.8435	-3.39374	N.A.	N.A.	F01D5.1 is involved in innate immune response.	175049	39	29	10	15.15	4.57	2.46e-06	8.29e-05	0.31	3.59	Y	Y
573	ZC412.3	WBGene00013884	ZC412.3	ZC412.3	ZC412.3a,ZC412.3b,ZC412.3a.1,ZC412.3a.2,ZC412.3a.3,ZC412.3b.1,ZC412.3b.2,ZC412.3b.3	5.2298	5.67615	7.58971	5.47202	N.A.	N.A.	RNA sequencing and microarray studies indicate that ZC412.3 is affected by Nicotinic acid, Rotenone, Resveratrol, Diazinon, Humic substances, and Sirolimus; tiling array, RNA sequencing, and microarray studies indicate that ZC412.3 is enriched in the body wall muscle cell, muscle cell, and body wall musculature and in neurons including the PLM neurons.	3565691	40	30	10	15.34	4.57	2.49e-06	8.39e-05	1.86	0.23	N	N
575	F13E9.11	WBGene00008760	F13E9.11	F13E9.11	F13E9.11a,F13E9.11b,F13E9.11:wp109,F13E9.11a,F13E9.11b	3.06443	2.94504	2.59665	6.01352	N.A.	N.A.	F13E9.11 is an ortholog of human CECR6 (cat eye syndrome chromosome region, candidate 6); microarray and RNA sequencing studies indicate that F13E9.11 is affected by sma-2, sma-4, lin-39, ubc-9, gld-2, daf-2, hlh-30, dcr-1, ain-2, spr-5, osm-11, tax-6, and nhr-25; RNA sequencing and microarray studies indicate that F13E9.11 is affected by 1-methylnicotinamide, Methylmercuric chloride, Cry5B, Quer…	177980	22	16	6	11.27	4.56	2.51e-06	8.41e-05	0.46	0.12	N	N
576	T07D3.4	WBGene00020307	T07D3.4	T07D3.4	T07D3.4a,T07D3.4b,T07D3.4a,T07D3.4b.1,T07D3.4b.2	0.0774468	2.11583	-4.45228	-1.77574	N.A.	N.A.	T07D3.4 is orthologous to the human gene, Fukutin (FKTN, also called FCMD).	173469	40	32	8	15.33	4.56	2.51e-06	8.4e-05	1.22	1.36	Y	Y
577	Y73B6BL.31	WBGene00022252	Y73B6BL.31	Y73B6BL.31	Y73B6BL.31a,Y73B6BL.31b,Y73B6BL.31:wp134,Y73B6BL.31a,Y73B6BL.31b	1.61522	2.26476	4.3951	1.85683	N.A.	N.A.	Y73B6BL.31 is an ortholog of human SLC35F3 (solute carrier family 35 member F3) and SLC35F4 (solute carrier family 35 member F4); microarray, tiling array, and RNA sequencing studies indicate that Y73B6BL.31 is affected by sma-2, daf-12, wdr-23, eat-2, daf-16, npr-1, cco-1, jmjd-3.1, jmjd-1.2, daf-2, hyl-2, hsf-1, mir-60, chd-3, let-418, and dpy-21; RNA sequencing and microarray studies indicate …	177408	9	9	0	7.14	4.56	2.55e-06	8.51e-05	0	0.38	Y	Y
578	asah-1	WBGene00010769	asah-1	K11D2.2	K11D2.2,K11D2.2.1,K11D2.2.2,K11D2.2.3	3.60958	3.74366	-1.42064	1.55345	intestine	adult Ce,larva Ce	asah-1 is an ortholog of human ASAH1 (N-acylsphingosine amidohydrolase 1); asah-1 is involved in determination of adult lifespan; asah-1 is expressed in the intestine.	173120	46	34	12	16.45	4.56	2.61e-06	8.71e-05	0.45	2.45	N	Y
579	C27A7.8	WBGene00007758	C27A7.8	C27A7.8	C27A7.8a,C27A7.8b,C27A7.8:wp156,C27A7.8b,C27A7.8a	2.35528	0.311384	-1.67745	0.528184	N.A.	N.A.	Microarray and RNA sequencing studies indicate that C27A7.8 is affected by ubc-9, clk-1, npr-1, daf-2, hyl-2, let-418, chd-3, his-24, hpl-1, hpl-2, and nasp-1; microarray and RNA sequencing studies indicate that C27A7.8 is affected by Hydrogen sulfide, 1-methylnicotinamide, Methylmercuric chloride, Rotenone, Tunicamycin, Manganese chloride, D-glucose, and Colistin; tiling array and RNA sequencing…	3565832	9	8	1	7.13	4.56	2.61e-06	8.7e-05	0.41	0.84	N	N
580	grd-10	WBGene00001699	grd-10	F09D12.1	F09D12.1,F09D12.1	7.57848	4.42733	2.66753	3.27001	seam cell	adult Ce,embryo Ce,L1 larva Ce,L2 larva Ce,L3 larva Ce,L4 larva Ce,larva Ce	grd-10 encodes a hedgehog-like protein, with an N-terminal signal sequence and a C-terminal Ground domain; GRD-10 is expressed in seam cells; the Ground domain is predicted to form a cysteine-crosslinked protein involved in intercellular signalling, and it has subtle similarity to the N-terminal Hedge domain of HEDGEHOG proteins; GRD-10 is weakly required for normal molting; GRD-10 is also requir…	184239	37	27	10	14.7	4.55	2.62e-06	8.73e-05	0	0.26	N	N
582	K11G12.6	WBGene00019657	K11G12.6	K11G12.6	K11G12.6a,K11G12.6b,K11G12.6:wp101,K11G12.6:wp153,K11G12.6b:wp184,K11G12.6b,K11G12.6a	4.52036	2.99659	3.97518	3.86467	N.A.	N.A.	K11G12.6 is an ortholog of human LMF2 (lipase maturation factor 2); microarray and RNA sequencing studies indicate that K11G12.6 is affected by cyc-1, npr-1, hsf-1, dpy-21, sir-2.1, daf-2, hcf-1, isp-1, and nuo-6; microarray studies indicate that K11G12.6 is affected by Quercetin, Hydrolyzable Tannins, and Paraquat; microarray and RNA sequencing studies indicate that K11G12.6 is enriched in the g…	180941	41	36	5	15.49	4.55	2.64e-06	8.75e-05	1.15	0.23	N	N
583	Y37D8A.2	WBGene00012544	Y37D8A.2	Y37D8A.2	Y37D8A.2,Y37D8A.2	5.45866	6.30181	8.57165	4.68334	N.A.	N.A.	Y37D8A.2 is an ortholog of human PLBD2 (phospholipase B domain containing 2); microarray, proteomic, RNA sequencing, and tiling array studies indicate that Y37D8A.2 is affected by cyc-1, K10D11.2, gld-1, let-7, wdr-5.1, tdp-1, daf-2, npr-1, rbr-2, mes-2, mes-6, sir-2.1, gei-8, dnj-14, and eat-2; RNA sequencing and microarray studies indicate that Y37D8A.2 is affected by Rotenone and Deoxyglucose;…	176698	43	29	14	15.87	4.55	2.66e-06	8.8e-05	0	0.53	N	N
584	unc-43	WBGene00006779	unc-43	K11E8.1	K11E8.1a,K11E8.1b,K11E8.1d,K11E8.1e,K11E8.1f,K11E8.1g,K11E8.1h,K11E8.1i,K11E8.1k,K11E8.1l,K11E8.1m,K11E8.1n,K11E8.1o,K11E8.1p,K11E8.1q,K11E8.1r,K11E8.1s,K11E8.1t,K11E8.1a:wp52,K11E8.1a:wp191,K11E8.1b:wp52,K11E8.1c:wp52,K11E8.1c:wp229,K11E8.1b.1,K11E8.1b.2,K11E8.1b.3,K11E8.1l.1,K11E8.1l.2,K11E8.1l.3,K11E8.1i.1,K11E8.1i.2,K11E8.1i.3,K11E8.1k.1,K11E8.1k.2,K11E8.1k.3,K11E8.1a,K11E8.1f.1,K11E8.1f.2,K1…	6.77937	5.5658	6.47912	7.82942	AWCL,AWCR,copulatory spicule,dorsal nerve cord,gonadal sheath cell,head neuron,intestine,nerve ring,nervous system,neuron,oocyte,postcloacal sensillum,spicule protractor muscle,spicule retractor muscle,tail neuron,ventral cord neuron,ventral nerve cord	adult Ce,larva Ce	unc-43 encodes the C. elegans ortholog of type II calcium/calmodulin-dependent protein kinase (CaMKII); unc-43 activity is required for a number of processes, including locomotion, neuronal cell fate specification and regulation of synaptic density, egg laying, defecation, and meiotic maturation; in regulating some of these processes, unc-43 acts in concert with MAPKKK and G protein signaling pat…	177921	22	19	3	11.24	4.55	2.67e-06	8.8e-05	0.38	0.45	Y	Y
585	C05C12.4	WBGene00007336	C05C12.4	C05C12.4	C05C12.4,C05C12.4:wp150,C05C12.4	0.960765	3.96346	-2.76011	-1.43536	N.A.	N.A.	RNA sequencing and microarray studies indicate that C05C12.4 is affected by D-glucose, Resveratrol, and Colistin; tiling array, RNA sequencing, and microarray studies indicate that C05C12.4 is enriched in the intestine and germ line and in the AFD neurons.	182252	30	24	6	13.17	4.55	2.7e-06	8.88e-05	1.78	0.61	N	Y
586	R11H6.4	WBGene00011252	R11H6.4	R11H6.4	R11H6.4a,R11H6.4b,R11H6.4c,R11H6.4:wp185,R11H6.4a,R11H6.4c,R11H6.4b	3.2119	4.29895	5.70196	0.980565	N.A.	N.A.	Microarray and RNA sequencing studies indicate that R11H6.4 is affected by cyc-1, eat-2, ahr-1, hlh-30, clk-1, daf-2, ham-3, hsf-1, chd-3, sir-2.1, daf-19, cye-1, cdk-2, tdp-1, and nuo-6; RNA sequencing and microarray studies indicate that R11H6.4 is affected by Rotenone, Manganese chloride, Cry5B, Quercetin, Hydrolyzable Tannins, and Humic substances; tiling array and RNA sequencing studies indi…	187833	40	31	9	15.28	4.55	2.71e-06	8.93e-05	0.12	0	N	N
588	T26H5.4	WBGene00012069	T26H5.4	T26H5.4	T26H5.4a,T26H5.4b,T26H5.4a,T26H5.4b	-1.65492	1.87051	-4.56995	-3.92002	N.A.	N.A.	Microarray and RNA sequencing studies indicate that T26H5.4 is affected by cyc-1, lin-15B, age-1, wdr-23, nhr-8, ubc-9, clk-1, elt-2, npr-1, dpy-21, hrp-2, sir-2.1, and rrf-2; microarray studies indicate that T26H5.4 is affected by Methylmercuric chloride, Tunicamycin, Resveratrol, Chlorpyrifos, Diazinon, Cry5B, Quercetin, and Colistin.	188957	39	34	5	15.07	4.54	2.76e-06	9.06e-05	0.4	2.01	N	Y
589	Y75B8A.11	WBGene00013548	Y75B8A.11	Y75B8A.11	Y75B8A.11a,Y75B8A.11:wp230,Y75B8A.11b,Y75B8A.11a	1.42056	3.50983	-0.285438	6.31957	N.A.	N.A.	Microarray, RNA sequencing, and tiling array studies indicate that Y75B8A.11 is affected by cyc-1, cep-1, clk-1, daf-2, jmjd-3.1, elli-1, and nuo-6; microarray and RNA sequencing studies indicate that Y75B8A.11 is affected by Hydrogen sulfide, Rotenone, D-glucose, adsorbable organic bromine compounds, Allantoin, and Sirolimus; tiling array, RNA sequencing, and microarray studies indicate that Y75…	190703	45	33	12	16.2	4.54	2.85e-06	9.33e-05	0	0.46	N	N
591	pdk-1	WBGene00003965	pdk-1	H42K12.1	H42K12.1a,H42K12.1b,H42K12.1b,H42K12.1a	3.69889	2.63941	2.93289	3.7456	gonad,head neuron,hypodermis,intestine,pharynx,tail neuron,ventral nerve cord	fully-elongated embryo Ce,postembryonic Ce	pdk-1 encodes the C. elegans 3-phosphoinositide-dependent kinase 1 ortholog; PDK-1 is a component of the DAF-2/insulin receptor-like signaling pathway and accordingly, functions to regulate such processes as dauer larvae formation, longevity, and salt chemotaxis learning; genetic analyses indicate that, in regulating dauer arrest, PDK-1 acts downstream of AGE-1/PI3K and upstream of the AKT-1 and …	180475	40	33	7	15.22	4.53	2.95e-06	9.61e-05	0.63	0	N	N
592	unc-38	WBGene00006774	unc-38	F21F3.5	F21F3.5,F21F3.5	-2.52943	1.23879	2.85039	4.54273	anal depressor muscle,anal sphincter muscle,anterior oblique muscle,body wall musculature,diagonal muscle,dorsal nerve cord,gubernacular erector muscle,gubernacular retractor muscle,longitudinal male muscle,nerve ring,nervous system,oblique male muscle,posterior oblique muscle,SPCL,SPCR,spicule protractor muscle,spicule retractor muscle,ventral nerve cord	N.A.	unc-38 encodes a nicotinic acetylcholine receptor (nAChR) alpha subunit; UNC-38 is required for normal locomotion and egg-laying, and functions as a subunit of a ligand-gated ion channel that likely mediates fast actions of acetylcholine at neuromuscular junctions and in the nervous system; when coexpressed with ACR-2, ACR-3, UNC-29, and LEV-1, non-alpha nAChR subunits, the resulting multimer can…	172105	44	32	12	15.97	4.52	3.02e-06	9.84e-05	0	0	N	N
593	C26B9.1	WBGene00016131	C26B9.1	C26B9.1	C26B9.1a,C26B9.1b,C26B9.1a.1,C26B9.1a.2,C26B9.1b	4.33429	1.94627	2.1997	2.31961	N.A.	N.A.	C26B9.1 is an ortholog of human C9orf91; RNA sequencing and microarray studies indicate that C26B9.1 is affected by lin-35, dpy-21, sir-2.1, daf-2, hcf-1, tdp-1, mir-35, and xpa-1; microarray studies indicate that C26B9.1 is affected by Atrazine, Cadmium, Humic substances, and single-walled carbon nanotubes; microarray and RNA sequencing studies indicate that C26B9.1 is enriched in the germ line …	180807	34	29	5	13.97	4.52	3.05e-06	9.91e-05	0.45	1.03	Y	N
595	F01F1.14	WBGene00017168	F01F1.14	F01F1.14	F01F1.14,F01F1.14	-4.50082	-0.948146	-0.217376	-1.54829	N.A.	N.A.	Microarray, tiling array, and RNA sequencing studies indicate that F01F1.14 is affected by cyc-1, daf-12, glp-1, skn-1, dpy-21, and ash-2; microarray studies indicate that F01F1.14 is affected by Hydrogen sulfide and Tryptophan; microarray and RNA sequencing studies indicate that F01F1.14 is enriched in the germ line and in the FLP and AFD neurons.	175830	45	34	11	16.12	4.51	3.19e-06	0.000103	1.41	0.4	N	N
596	T21D12.12	WBGene00020651	T21D12.12	T21D12.12	T21D12.12,T21D12.12	3.93751	3.89168	3.30123	2.03897	N.A.	N.A.	T21D12.12 is an ortholog of human TFPI2 (tissue factor pathway inhibitor 2), TFPI (tissue factor pathway inhibitor) and WFDC8 (WAP four-disulfide core domain 8); T21D12.12 is predicted to have serine-type endopeptidase inhibitor activity, based on protein domain information.	188695	38	29	9	14.76	4.51	3.23e-06	0.000105	1.47	1.23	Y	N
598	lmp-1	WBGene00003053	lmp-1	C03B1.12	C03B1.12,C03B1.12	6.39462	6.31949	6.92073	6.20839	coelomocyte,germ line,intestinal cell,intestine	adult Ce,all stages Ce	lmp-1 encodes a protein with similarity to vertebrate lysosome-associated membrane proteins CD68, and appears to be the only protein in C. elegans that has a GYXX (phi) vertebrate lysosomal targeting sequence at its carboxy terminus; LMP-1 is widely expressed in the early embryo, with later expression seen in the intestine, coelomocytes, and neurons; LMP-1 localizes to lysosomes and is recruited …	180912	44	34	10	15.9	4.5	3.35e-06	0.000108	0.83	1.43	Y	Y
599	C54F6.6	WBGene00016924	C54F6.6	C54F6.6	C54F6.6,C54F6.6:wp154,C54F6.6:wp216,C54F6.6	3.05614	1.67255	1.38211	-3.83174	N.A.	N.A.	Microarray and RNA sequencing studies indicate that C54F6.6 is affected by age-1, atfs-1, spg-7, nhr-114, daf-2, mut-2, dcr-1, ain-1, ash-2, alg-1, isp-1, and nuo-6; microarray and RNA sequencing studies indicate that C54F6.6 is affected by Tryptophan, Multi-walled carbon nanotubes, Diazinon, Quercetin, Humic substances, and Sirolimus; RNA sequencing studies indicate that C54F6.6 is enriched in t…	183805	43	36	7	15.71	4.5	3.36e-06	0.000108	1.04	0.12	N	N
600	fipr-22	WBGene00007989	fipr-22	C37A5.2	C37A5.2,C37A5.2	0.276096	0.620195	-0.744383	-1.48037	N.A.	N.A.	Microarray and RNA sequencing studies indicate that fipr-22 is affected by cyc-1, blmp-1, bar-1, hlh-30, prg-1, clk-1, daf-2, daf-16, ham-3, jmjd-1.2, dop-1, hsf-1, daf-12, dpy-21, ain-1, ain-2, and nasp-1; RNA sequencing and microarray studies indicate that fipr-22 is affected by Rotenone, D-glucose, Progesterone, and Acrylamide; tiling array studies indicate that fipr-22 is enriched in the excr…	259409	26	19	7	12.12	4.5	3.37e-06	0.000108	1.55	0.43	Y	N
601	F52E4.5	WBGene00018702	F52E4.5	F52E4.5	F52E4.5,F52E4.5:wp228,F52E4.5	3.51236	6.02606	3.84616	2.30085	N.A.	N.A.	Microarray studies indicate that F52E4.5 is affected by Cry5B, Humic substances, Paraquat, Sirolimus, and Ag nanoparticles; tiling array and RNA sequencing studies indicate that F52E4.5 is enriched in the hypodermis and in the dopaminergic, NSM, and PLM neurons.	180595	41	29	12	15.31	4.5	3.42e-06	0.00011	1.01	0	Y	N
603	D2030.12	WBGene00008421	D2030.12	D2030.12	D2030.12,D2030.12	1.78575	2.00213	0.212114	0.390555	N.A.	N.A.	Microarray and RNA sequencing studies indicate that D2030.12 is affected by clk-1, unc-39, and daf-2.	3565410	9	9	0	7.02	4.48	3.67e-06	0.000117	1.29	0.27	Y	N
604	C25E10.5	WBGene00016095	C25E10.5	C25E10.5	C25E10.5,C25E10.5	4.15288	2.87287	1.41866	2.19503	N.A.	N.A.	C25E10.5 is an ortholog of human MFSD8 (major facilitator superfamily domain containing 8); RNA sequencing and microarray studies indicate that C25E10.5 is affected by Bisphenol A, Atrazine, Quercetin, and Sirolimus; tiling array and RNA sequencing studies indicate that C25E10.5 is enriched in the excretory cell and amphid sheath cell and in the GABAergic, AFD, and PLM neurons.	179280	44	35	9	15.83	4.48	3.67e-06	0.000117	0.31	0	N	N
605	tag-97	WBGene00006462	tag-97	C33A11.4	C33A11.4a,C33A11.4b,C33A11.4:wp83,C33A11.4b,C33A11.4a	3.6379	2.79586	3.8818	6.27429	ALML,ALMR,amphid neuron,CANL,CANR,excretory cell,excretory gland cell,head neuron,intestine,lateral nerve cord,nerve ring,nervous system,neuron,phasmid neuron,PLML,PLMR,rectal epithelium,tail neuron,ventral cord neuron	adult Ce,L1 larva Ce,L2 larva Ce,L3 larva Ce,L4 larva Ce,larva Ce	svh-5 is an ortholog of human ELF5 (E74 like ETS transcription factor 5), ELF3 (E74 like ETS transcription factor 3) and EHF (ETS ous factor); svh-5 is predicted to have sequence-specific DNA binding activity and transcription factor activity, sequence-specific DNA binding, based on protein domain information; svh-5 is expressed in the nervous system, intestine, excretory gland cell, rectal epith…	181627	43	36	7	15.61	4.47	3.84e-06	0.000122	0.19	0.13	N	N
606	lgc-43	WBGene00008076	lgc-43	C43F9.9	C43F9.9,C43F9.9.1,C43F9.9.2	0.754244	1.07588	-1.75526	-0.968413	N.A.	N.A.	lgc-43 is an ortholog of members of the human GABR (Gamma-aminobutyric acid type A receptor subunits) family including GABRG2; lgc-43 is predicted to have extracellular ligand-gated ion channel activity, based on protein domain information.	259591	9	9	0	7	4.47	3.91e-06	0.000125	1.19	0.53	Y	N
607	unc-25	WBGene00006762	unc-25	Y37D8A.23	Y37D8A.23a,Y37D8A.23b,Y37D8A.23c,Y37D8A.23a.1,Y37D8A.23a.2,Y37D8A.23b,Y37D8A.23c	4.55707	4.34941	3.83266	8.78756	AVL,DD neuron,DD1,DD2,DD3,DD4,DD5,DD6,DVB,neuron,RIS,RMED,RMEL,RMER,RMEV,VD neuron,VD1,VD2,VD3,VD4,VD5,VD6,VD7,VD8,VD9,VD10,VD11,VD12,VD13	L1 larva Ce	unc-25 encodes the C. elegans ortholog of the GABA neurotransmitter biosynthetic enzyme, glutamic acid decarboxylase (GAD); unc-25 activity is required for GABA synthesis and thus for normal synaptic transmission and GABA-mediated behaviors; UNC-25 is expressed specifically in the 26 GABAergic neurons as soon as they are generated and localizes to cell bodies, axonal branches, and synaptic region…	176713	42	31	11	15.4	4.47	3.98e-06	0.000127	0.33	0	N	N
608	T25F10.3	WBGene00020806	T25F10.3	T25F10.3	T25F10.3,T25F10.3.1,T25F10.3.2	5.10411	4.27415	1.97349	3.64212	N.A.	N.A.	T25F10.3 is an ortholog of human GAS6 (growth arrest specific 6) and MEGF6 (multiple EGF like domains 6); RNA sequencing and microarray studies indicate that T25F10.3 is affected by D-glucose, Resveratrol, Atrazine, Hydrolyzable Tannins, single-walled carbon nanotubes, Dafa#1, adsorbable organic bromine compounds, and Sirolimus; microarray and RNA sequencing studies indicate that T25F10.3 is enri…	179067	35	28	7	14.01	4.47	3.98e-06	0.000126	1.67	0.13	N	N
609	comt-5	WBGene00021492	comt-5	Y40B10A.7	Y40B10A.7,Y40B10A.7	1.3185	1.85112	-0.464212	0.115424	N.A.	N.A.	comt-5 is an ortholog of human COMTD1 (catechol-O-methyltransferase domain containing 1); comt-5 is predicted to have O-methyltransferase activity, based on protein domain information.	178684	29	22	7	12.71	4.47	4e-06	0.000127	0.21	0.48	N	N
610	alh-1	WBGene00000107	alh-1	F54D8.3	F54D8.3a,F54D8.3b,F54D8.3a.1,F54D8.3a.2,F54D8.3b.1,F54D8.3b.2,F54D8.3b.3,F54D8.3b.4	6.79028	7.81133	7.37576	5.34997	head neuron,hmc,intestine,nervous system,neuron,pharynx,PVT,rectal gland cell	adult Ce,embryo Ce,larva Ce	alh-1 is orthologous to the human gene ALDEHYDE DEHYDROGENASE 2, MITOCHONDRIAL (ALDH2; OMIM:100650), in which a polymorphism can lead to acute ethanol intolerance.	175691	46	37	9	16.12	4.46	4.1e-06	0.00013	0.33	0.68	Y	Y
611	col-142	WBGene00000715	col-142	T15B7.4	T15B7.4,T15B7.4	6.96732	6.63787	6.56615	5.28892	N.A.	N.A.	col-142 is an ortholog of human SFTPD (surfactant protein D) and COL26A1 (collagen type XXVI alpha 1 chain) and members of the COL (Collagens) family including COL9A1; col-142 is a structural constituent of cuticle, based on protein domain information.	188514	46	33	13	16.11	4.46	4.14e-06	0.000131	0	0.12	Y	N
612	T20D4.7	WBGene00020613	T20D4.7	T20D4.7	T20D4.7,T20D4.7:wp252,T20D4.7	-0.993703	0.573042	-1.57673	-1.88374	N.A.	N.A.	T20D4.7 is an ortholog of human NXNL1 (nucleoredoxin-like 1), NXNL2 (nucleoredoxin-like 2) and NXN (nucleoredoxin); microarray and RNA sequencing studies indicate that T20D4.7 is affected by Aldicarb, Multi-walled carbon nanotubes, and Diazinon; tiling array and RNA sequencing studies indicate that T20D4.7 is enriched in the body wall muscle cell, hypodermis, Z4, Z1, and muscle cell.	188643	43	35	8	15.56	4.46	4.14e-06	0.000131	2.77	1.23	N	N
614	Y73B6BL.35	WBGene00022254	Y73B6BL.35	Y73B6BL.35	Y73B6BL.35a,Y73B6BL.35b,Y73B6BL.35a,Y73B6BL.35b	3.48885	4.35289	5.59017	8.51244	N.A.	N.A.	Microarray and RNA sequencing studies indicate that Y73B6BL.35 is affected by cyc-1, wdr-23, prg-1, daf-2, cco-1, jmjd-1.2, rbr-2, dpy-21, ain-2, and mir-243; RNA sequencing studies indicate that Y73B6BL.35 is affected by Multi-walled carbon nanotubes and D-glucose; tiling array, RNA sequencing, and microarray studies indicate that Y73B6BL.35 is enriched in neurons.	177402	9	9	0	6.98	4.46	4.17e-06	0.000131	0.6	0.53	N	N
615	dim-1	WBGene00001000	dim-1	C18A11.7	C18A11.7a,C18A11.7b,C18A11.7b,C18A11.7a	6.77365	8.48633	10.167	6.31513	body wall musculature	1.5-fold embryo Ce,2-fold embryo Ce,3-fold embryo Ce,adult Ce,fully-elongated embryo Ce,L1 larva Ce,L2 larva Ce,L3 larva Ce,L4 larva Ce	dim-1 encodes novel proteins containing three immunoglobulin-like repeats in the carboxy terminus; dim-1 was originally identified in screens for mutations that suppress locomotion defects caused by aberrant muscle assembly in animals carrying a missense mutation in unc-112, which encodes a pleckstrin homology domain-containing protein required for the early stages of muscle assembly; loss-of-fun…	181062	45	32	13	15.91	4.45	4.26e-06	0.000134	0.62	0.42	Y	N
616	F52E10.4	WBGene00009935	F52E10.4	F52E10.4	F52E10.4a,F52E10.4b,F52E10.4c,F52E10.4d,F52E10.4d,F52E10.4a,F52E10.4c,F52E10.4b	2.1308	3.21301	2.46976	3.47189	N.A.	N.A.	Microarray and RNA sequencing studies indicate that F52E10.4 is affected by cyc-1, hlh-30, lin-15B, wdr-23, jmjd-3.1, cec-4, sir-2.1, ahr-1, dpy-10, osm-8, and tdp-1; RNA sequencing and microarray studies indicate that F52E10.4 is affected by Rotenone, Resveratrol, Hydrolyzable Tannins, Colistin, adsorbable organic bromine compounds, Sirolimus, and Ag nanoparticles; tiling array studies indicate …	181702	32	24	8	13.32	4.45	4.35e-06	0.000136	0.55	0.17	N	N
617	glt-5	WBGene00001623	glt-5	Y53C12A.2	Y53C12A.2,Y53C12A.2	2.95883	1.70397	-2.05496	-2.48818	pharynx	N.A.	glt-5 encodes an ortholog of glutamate/aspartate and neutral amino acid transporters.	174530	42	32	10	15.33	4.45	4.37e-06	0.000137	0.93	3.05	Y	N
618	osm-11	WBGene00003891	osm-11	F11C7.5	F11C7.5,F11C7.5.1,F11C7.5.2	13.1397	6.3936	7.60178	6.97601	coelomocyte,hypodermis,P3.p hermaphrodite,P4.p hermaphrodite,P5.p hermaphrodite,P6.p hermaphrodite,P7.p hermaphrodite,P8.p hermaphrodite,seam cell,spermatheca,uterus	1.5-fold embryo Ce,2-fold embryo Ce,3-fold embryo Ce,adult Ce,comma embryo Ce,embryo Ce,fully-elongated embryo Ce,L1 larva Ce,L2 larva Ce,L3 larva Ce,L4 larva Ce	osm-11 encodes a protein required for normal osmosensation, osmotic resistance, and defecation rhythm, and for fully normal growth rate; OSM-11 has no clear orthologs outside of nematodes, but is paralogous to DOS-1, OSM-7, and K02F3.7, has a predicted signal sequence with 12 conserved cysteine residues, and may be secreted; osm-11 mutants have abnormally high levels of internal glycerol, defecti…	181772	45	36	9	15.88	4.44	4.42e-06	0.000138	0.19	1.52	Y	N
619	cyp-25A2	WBGene00007964	cyp-25A2	C36A4.2	C36A4.2,C36A4.2:wp133,C36A4.2	-1.68442	4.76408	-1.61546	-1.05528	N.A.	N.A.	cyp-25A2 is an ortholog of human TBXAS1 (thromboxane A synthase 1) and members of the CYP3 (Cytochrome P4503) family including CYP3A43; cyp-25A2 is predicted to have heme binding activity, iron ion binding activity, and oxidoreductase activity, acting on paired donors, with incorporation or reduction of molecular oxygen, based on protein domain information.	175495	45	35	10	15.88	4.44	4.42e-06	0.000138	1.05	0.74	Y	Y
620	F41E7.2	WBGene00009618	F41E7.2	F41E7.2	F41E7.2,F41E7.2:wp77,F41E7.2.1,F41E7.2.2,F41E7.2.3	0.204504	0.277237	-0.434336	-1.38166	N.A.	N.A.	F41E7.2 is an ortholog of human SLC9B2 (solute carrier family 9 member B2) and SLC9B1 (solute carrier family 9 member B1); F41E7.2 is predicted to have solute:proton antiporter activity, based on protein domain information.	181235	34	27	7	13.74	4.44	4.43e-06	0.000138	0.21	0.77	N	N
621	F59A7.2	WBGene00019090	F59A7.2	F59A7.2	F59A7.2,F59A7.2	4.66715	3.45293	0.809008	-0.698392	N.A.	N.A.	F59A7.2 is involved in defense response to Gram-negative bacterium.	178682	40	29	11	14.93	4.44	4.5e-06	0.00014	0.37	0.26	N	N
622	ZC449.4	WBGene00022614	ZC449.4	ZC449.4	ZC449.4,ZC449.4:wp133,ZC449.4	1.73223	2.11258	4.3835	6.5755	N.A.	N.A.	Tiling array, RNA sequencing, and microarray studies indicate that ZC449.4 is affected by daf-16, daf-2, jmjd-1.2, ain-2, cdk-4, and cyd-1; RNA sequencing and microarray studies indicate that ZC449.4 is affected by Rotenone, D-glucose, and Humic substances; tiling array, RNA sequencing, and microarray studies indicate that ZC449.4 is enriched in the ventral nerve cord and body wall musculature an…	191172	33	26	7	13.5	4.43	4.6e-06	0.000143	0.12	0.13	N	N
623	gst-20	WBGene00001768	gst-20	Y48E1B.10	Y48E1B.10,Y48E1B.10	6.89011	5.71362	5.09285	3.6585	N.A.	N.A.	gst-20 is an ortholog of members of the human GST (Soluble glutathione S-transferases) family including HPGDS; gst-20 is involved in determination of adult lifespan.	175008	45	33	12	15.84	4.43	4.66e-06	0.000144	0.34	0.41	Y	Y
624	F58F9.7	WBGene00019060	acox-3	F58F9.7	F58F9.7,F58F9.7.1,F58F9.7.2,F58F9.7.3	3.40804	3.99365	0.484009	0.777849	N.A.	N.A.	acox-3 is an ortholog of human ACOX3 (acyl-CoA oxidase 3, pristanoyl); acox-3 is predicted to have FAD binding activity and acyl-CoA oxidase activity, based on protein domain information.	177386	43	29	14	15.47	4.43	4.7e-06	0.000145	1.12	1	Y	Y
624	acox-3	WBGene00019060	acox-3	F58F9.7	F58F9.7,F58F9.7.1,F58F9.7.2,F58F9.7.3	-0.0953759	1.35584	-4.17613	-2.67498	N.A.	N.A.	acox-3 is an ortholog of human ACOX3 (acyl-CoA oxidase 3, pristanoyl); acox-3 is predicted to have FAD binding activity and acyl-CoA oxidase activity, based on protein domain information.	184167	43	29	14	15.47	4.43	4.7e-06	0.000145	1.12	1	Y	Y
625	grsp-3	WBGene00016403	grsp-3	C34D4.11	C34D4.11a,C34D4.11b,C34D4.11a,C34D4.11b	0.68892	0.85608	-1.30664	-2.73799	N.A.	N.A.	Microarray, tiling array, and RNA sequencing studies indicate that grsp-3 is affected by cyc-1, hpl-2, eat-2, daf-2, jmjd-3.1, jmjd-1.2, dop-1, hsf-1, rbr-2, dpy-21, daf-12, daf-16, sir-2.1, crh-1, tax-6, and tdp-1; RNA sequencing and microarray studies indicate that grsp-3 is affected by Rotenone, Manganese chloride, D-glucose, Resveratrol, Fluoranthene, Dafa#1, and Sirolimus; chronogram analysi…	183209	45	36	9	15.81	4.42	4.84e-06	0.000149	1.02	1.02	Y	N
626	scd-2	WBGene00004740	scd-2	T10H9.2	T10H9.2,T10H9.2:wp121,T10H9.2:wp220,T10H9.2	1.90569	1.65316	1.84323	5.70844	AIAL,AIAR,amphid neuron,body wall musculature,head neuron,intestine,nerve ring,nervous system,neuron,NSML,NSMR,phasmid neuron,PVT,tail neuron,ventral cord neuron	adult Ce,larva Ce	scd-2 encodes the homolog of the anaplastic lymphoma kinase (ALK) receptor tyrosine kinase (RTK) (OMIM:105590, involved in the development of non-Hodgkin's lymphoma in humans); the ALK family of receptor tyrosine kinases belong to the insulin receptor superfamily; scd-2 was initially identified in a naturally occuring desert oasis strain of C. elegans that fails to respond to the dauer pheromone …	179054	43	35	8	15.44	4.42	4.85e-06	0.000149	0.11	0.12	N	N
627	rskn-2	WBGene00008311	rskn-2	C54G4.1	C54G4.1a,C54G4.1b,C54G4.1:wp90,C54G4.1a,C54G4.1b	5.84175	4.65025	5.06091	5.6108	anal depressor muscle,body wall musculature,head neuron,mu_int_L,mu_int_R,nerve ring,nervous system,reproductive system,spermatheca,tail neuron,uterine muscle,ventral cord neuron,vulva,vulval muscle	adult Ce,larva Ce	rskn-2 is an ortholog of human RPS6KA5 (ribosomal protein S6 kinase A5) and RPS6KA4 (ribosomal protein S6 kinase A4); rskn-2 is involved in embryo development, nematode larval development and reproduction; rskn-2 is predicted to have ATP binding activity, magnesium ion binding activity, and protein serine/threonine kinase activity, based on protein domain information; rskn-2 is expressed in the m…	172581	41	31	10	15.05	4.42	4.96e-06	0.000153	0.33	0.29	Y	N
628	T04C12.7	WBGene00011429	T04C12.7	T04C12.7	T04C12.7,T04C12.7	0.496542	-2.53314	-0.0374353	-3.47982	N.A.	N.A.	RNA sequencing, microarray, and tiling array studies indicate that T04C12.7 is affected by wdr-23, eat-2, emr-1, lem-2, bar-1, clk-1, wrn-1, daf-2, ham-3, npr-1, set-25, met-2, dpy-21, elli-1, and daf-16; microarray and RNA sequencing studies indicate that T04C12.7 is affected by Tunicamycin, Manganese chloride, D-glucose, and Colistin; tiling array studies indicate that T04C12.7 is enriched in t…	179530	7	7	0	6.09	4.42	5.01e-06	0.000154	0.68	0.5	N	N
630	flp-28	WBGene00044686	flp-28	W07E11.4	W07E11.4,W07E11.4	7.51344	6.40352	6.08907	10.745	N.A.	N.A.	Tiling array, microarray, and RNA sequencing studies indicate that flp-28 is affected by hpl-2, clk-1, glp-1, tcer-1, jmjd-3.1, let-418, chd-3, daf-2, alg-1, and ain-2; RNA sequencing studies indicate that flp-28 is affected by Rotenone; RNA sequencing and microarray studies indicate that flp-28 is enriched in neurons.	181220	9	9	0	6.91	4.41	5.08e-06	0.000156	0.55	0	N	N
631	R186.1	WBGene00011305	R186.1	R186.1	R186.1,R186.1	-0.112871	1.54918	1.77343	-1.40113	N.A.	N.A.	R186.1 is an ortholog of human Tango2 (transport and golgi organization 2); R186.1 is involved in embryo development.	179780	36	33	3	14.05	4.41	5.14e-06	0.000157	0.46	0.36	Y	N
632	C04E12.5	WBGene00015435	C04E12.5	C04E12.5	C04E12.5a,C04E12.5b,C04E12.5:wp106,C04E12.5a,C04E12.5b	-0.610625	-1.4581	-3.59459	0.453693	N.A.	N.A.	Microarray, tiling array, and RNA sequencing studies indicate that C04E12.5 is affected by sma-2, sma-4, rsr-2, ubc-9, fbf-1, clk-1, daf-2, daf-16, jmjd-3.1, jmjd-1.2, dop-1, hsf-1, rbr-2, dpy-21, and daf-12; microarray studies indicate that C04E12.5 is affected by Tunicamycin.	182210	31	26	5	13	4.41	5.17e-06	0.000158	0.49	0.53	N	N
633	C17G10.7	WBGene00015919	C17G10.7	C17G10.7	C17G10.7,C17G10.7	4.52309	1.17388	1.14992	4.17964	N.A.	N.A.	C17G10.7 is involved in lipid storage.	173949	41	32	9	14.99	4.4	5.44e-06	0.000166	0.46	1.23	Y	N
634	srj-14	WBGene00005602	srj-14	C03G6.3	C03G6.3a,C03G6.3b,C03G6.3a	-0.629538	0.226551	2.22805	-2.52618	N.A.	N.A.	RNA sequencing, microarray, and tiling array studies indicate that srj-14 is affected by wdr-23, emr-1, lem-2, clk-1, daf-2, glp-1, npr-1, cec-4, elli-1, daf-16, tax-6, tdp-1, and nhr-25; microarray and RNA sequencing studies indicate that srj-14 is affected by Tryptophan, Rotenone, single-walled carbon nanotubes, and Sirolimus.	179124	38	30	8	14.41	4.4	5.46e-06	0.000166	0.21	0.45	N	N
635	C50F7.6	WBGene00016846	C50F7.6	C50F7.6	C50F7.6a,C50F7.6b,C50F7.6a,C50F7.6b	0.935811	2.50397	4.87505	3.34738	N.A.	N.A.	C50F7.6 is an ortholog of human PDZD4 (PDZ domain containing 4), PDZRN3 (PDZ domain containing ring finger 3) and PDZRN4 (PDZ domain containing ring finger 4); microarray, RNA sequencing, and tiling array studies indicate that C50F7.6 is affected by cyc-1, emr-1, lem-2, prg-1, wrn-1, jmjd-3.1, jmjd-1.2, mes-2, mes-6, dpy-21, eri-1, ain-1, ain-2, ash-2, daf-2, and eat-2; microarray studies indicat…	177553	44	33	11	15.5	4.39	5.74e-06	0.000174	0.12	0	N	N
636	ttr-48	WBGene00022515	ttr-48	ZC64.2	ZC64.2,ZC64.2.1,ZC64.2.2	4.16592	6.34472	6.51661	2.56006	N.A.	N.A.	ttr-48 is involved in lipid storage.	191072	37	28	9	14.17	4.39	5.75e-06	0.000174	1.85	1.59	Y	Y
637	Y48C3A.3	WBGene00012987	Y48C3A.3	Y48C3A.3	Y48C3A.3,Y48C3A.3	2.85502	3.98188	3.54347	3.85029	N.A.	N.A.	Y48C3A.3 is an ortholog of human FAXC (failed axon connections); microarray, proteomic, and RNA sequencing studies indicate that Y48C3A.3 is affected by clk-1, cyc-1, age-1, gld-1, let-7, daf-2, jmjd-1.2, daf-12, daf-16, tdp-1, tbx-2, nhr-25, isp-1, nuo-6, and lin-35; microarray studies indicate that Y48C3A.3 is affected by Humic substances; microarray, tiling array, and RNA sequencing studies in…	190020	39	28	11	14.56	4.38	5.81e-06	0.000176	0.15	0	N	N
639	F13H10.6	WBGene00008777	F13H10.6	F13H10.6	F13H10.6a,F13H10.6b,F13H10.6a.1,F13H10.6a.2	8.35841	5.11463	4.82057	4.87684	N.A.	N.A.	Microarray, tiling array, and RNA sequencing studies indicate that F13H10.6 is affected by cyc-1, sam-10, lin-15B, hpl-2, wrn-1, daf-2, jmjd-3.1, lin-28, hlh-30, mir-243, alg-1, and nhr-25; RNA sequencing studies indicate that F13H10.6 is affected by Rotenone and Cry5B; RNA sequencing and tiling array studies indicate that F13H10.6 is enriched in the germ line and muscle cell and in the NSM, AFD,…	260099	9	9	0	6.85	4.38	6.04e-06	0.000182	0.29	0.69	N	N
640	gly-6	WBGene00001631	gly-6	H38K22.5	H38K22.5a,H38K22.5b,H38K22.5c,H38K22.5d,H38K22.5d:wp205,H38K22.5c.1,H38K22.5c.2,H38K22.5a.1,H38K22.5a.2,H38K22.5d,H38K22.5b.1,H38K22.5b.2	7.2101	3.33998	2.92772	2.62838	N.A.	N.A.	gly-6 is an ortholog of human WBSCR17 (Williams-Beuren syndrome chromosome region 17) and members of the GALNT (Polypeptide N-acetylgalactosaminyltransferases) family including GALNT18; RNA sequencing and microarray studies indicate that gly-6 is affected by D-glucose, Diazinon, Humic substances, Paraquat, and Sirolimus; microarray, tiling array, and RNA sequencing studies indicate that gly-6 is …	175558	41	29	12	14.9	4.37	6.09e-06	0.000184	0.99	0.23	N	N
641	snt-1	WBGene00004921	snt-1	F31E8.2	F31E8.2a,F31E8.2b,F31E8.2b,F31E8.2a	3.85343	3.43507	3.61014	8.10052	dorsal nerve cord,DVB,Excretory duct,nerve ring,neuron,pharyngeal nerve process,spermatheca,tail neuron,uterine toroidal epithelial cell,uv1,vas deferens,ventral nerve cord	adult Ce	snt-1 encodes two proteins, SNT-1A and SNT-1B, orthologous to synaptotagmin; SNT-1 is required for synaptic vesicle exocytosis and neurotransmitter release as well as for synaptic vesicle recycling via clathrin-mediated endocytosis; accordingly, snt-1 activity is required for a variety of behaviors including pharyngeal pumping, locomotion, and defecation; SNT-1A and SNT-1B isoforms are expressed …	174120	43	34	9	15.26	4.37	6.19e-06	0.000186	2.49	0.48	N	N
642	alh-4	WBGene00000110	alh-4	T05H4.13	T05H4.13a,T05H4.13b,T05H4.13c,T05H4.13c.1,T05H4.13c.2,T05H4.13b.1,T05H4.13b.2,T05H4.13a.1,T05H4.13a.2	6.92314	5.2523	4.44047	4.37062	N.A.	N.A.	alh-4 is an ortholog of members of the human ALDH (Aldehyde dehydrogenases) family including ALDH3A2; alh-4 is involved in determination of adult lifespan, embryo development, nematode larval development and reproduction; alh-4 is predicted to have aldehyde dehydrogenase [NAD(P)+] activity, based on protein domain information.	179026	46	37	9	15.78	4.36	6.44e-06	0.000194	0.15	1.52	N	N
643	T14B1.1	WBGene00011763	T14B1.1	T14B1.1	T14B1.1,T14B1.1.1,T14B1.1.2,T14B1.1.3	3.49203	2.15727	3.76762	5.10743	head neuron,hyp7 syncytium,hypodermis,muscle cell,neuron,seam cell,ventral nerve cord,vulval muscle	adult Ce,L1 larva Ce,L2 larva Ce,L3 larva Ce,L4 larva Ce	T14B1.1 is involved in lipid storage; T14B1.1 is expressed in the muscle cell, hypodermis, and the nervous system.	181181	39	30	9	14.47	4.36	6.54e-06	0.000196	2.2	1.49	N	N
644	grd-5	WBGene00001694	grd-5	F41E6.2	F41E6.2,F41E6.2	10.6313	7.31721	6.13782	6.59528	anterior arcade cell,hypodermis,pharyngeal neuron,rectal epithelium,seam cell,vulB1,vulB2,vulD	adult Ce,L4 larva Ce	grd-5 encodes a hedgehog-like protein, with an N-terminal signal sequence and a C-terminal Ground domain; GRD-5 is expressed in adult anterior and posterior seam cells, overlapping GRD-3 expression; the Ground domain is predicted to form a cysteine-crosslinked protein involved in intercellular signalling, and it has subtle similarity to the N-terminal Hedge domain of HEDGEHOG proteins; GRD-5 is w…	179244	45	30	15	15.55	4.35	6.85e-06	0.000205	1.22	0.41	N	N
645	sid-5	WBGene00017445	sid-5	F14B8.2	F14B8.2,F14B8.2	5.90611	3.57991	4.74888	4.27297	embryonic cell,intestine,muscle cell,neuron,somatic cell,somatic gonad,spermatheca	N.A.	sid-5 is expressed in the muscle cell, spermatheca, nervous system, intestine, somatic gonad, embryonic cell, and the somatic cell.	184450	43	30	13	15.17	4.34	7.01e-06	0.00021	0.76	0.61	N	N
646	flp-20	WBGene00001463	flp-20	E01H11.3	E01H11.3,E01H11.3:wp154,E01H11.3	4.17879	3.53305	3.65213	7.417	AIBL,AIBR,ALML,ALMR,ASEL,ASER,AVM,LUAL,LUAR,nerve ring,PLML,PLMR,PVCL,PVCR,PVM,PVR,PVT,RIBL,RIBR	N.A.	flp-20 encodes two copies of a single FMRFamide-related short peptide neurotransmitter; the precise role of this peptide in C. elegans neurotransmission is not yet known.	181165	9	8	1	6.79	4.33	7.33e-06	0.000219	0.26	0	N	N
647	gst-1	WBGene00001749	gst-1	R107.7	R107.7,R107.7.1,R107.7.2	7.5441	9.00343	7.44925	6.81159	DA neuron	N.A.	gst-1 encodes a putative glutathione S-transferase of the pi class; GST-1 is required for sperm to normally migrate towards a PUFA-based signal exuded by oocytes; gst-1(RNAi) hermaphrodites are infertile, both through aberrant loss of their own sperm and through failure of males to effectively inseminate them.	176281	46	33	13	15.63	4.32	7.77e-06	0.000232	0.52	0	N	N
648	F46F2.5	WBGene00009789	F46F2.5	F46F2.5	F46F2.5,F46F2.5:wp178,F46F2.5:wp208,F46F2.5	4.41999	1.35743	2.25071	3.26668	N.A.	N.A.	Tiling array, RNA sequencing, and microarray studies indicate that F46F2.5 is affected by daf-16, hpl-2, eat-2, blmp-1, bar-1, prg-1, tcer-1, npr-1, dpy-21, daf-12, daf-2, and sir-2.1; microarray studies indicate that F46F2.5 is affected by Hydrogen sulfide; RNA sequencing studies indicate that F46F2.5 is enriched in the AFD neurons.	3565739	9	9	0	6.77	4.32	7.79e-06	0.000232	1.68	0.68	Y	N
649	sri-21	WBGene00005533	sri-21	T24A6.4	T24A6.4,T24A6.4	-3.93173	-2.12663	-4.81234	0.767594	N.A.	N.A.	Microarray and RNA sequencing studies indicate that sri-21 is affected by cyc-1, dpy-21, sir-2.1, and ain-1; microarray and RNA sequencing studies indicate that sri-21 is affected by Tunicamycin and Multi-walled carbon nanotubes; tiling array studies indicate that sri-21 is enriched in neurons.	191901	35	25	10	13.56	4.32	7.86e-06	0.000233	0.35	0	N	N
650	F41E7.7	WBGene00009623	F41E7.7	F41E7.7	F41E7.7a,F41E7.7b,F41E7.7:wp204,F41E7.7b,F41E7.7a	-1.07277	3.3876	2.38116	6.90602	N.A.	N.A.	Microarray and RNA sequencing studies indicate that F41E7.7 is affected by clk-1, daf-2, dpy-21, slr-2, tax-6, gei-8, tbx-2, isp-1, and nuo-6; RNA sequencing and microarray studies indicate that F41E7.7 is affected by D-glucose and Humic substances; tiling array, RNA sequencing, and microarray studies indicate that F41E7.7 is enriched in the ventral nerve cord and in neurons.	185625	36	25	11	13.74	4.31	8.11e-06	0.000241	1.6	0.36	N	N
651	camt-1	WBGene00020251	camt-1	T05C1.4	T05C1.4a,T05C1.4b,T05C1.4c,T05C1.4c,T05C1.4b,T05C1.4a	4.8759	3.89637	4.99407	6.28698	N.A.	N.A.	T05C1.4 encodes, by alternative splicing, two members of the CAMTA family of calmodulin-binding transcriptional activators that are required for embryonic development; CAMTA proteins are conserved in animals and plants but absent from unicellular eukaryotes, and may thus represent a transcriptional activator specific to multicellular organisms; the common organization of CAMTA proteins is to have…	173786	45	39	6	15.42	4.31	8.12e-06	0.00024	0.19	0.59	N	N
652	T27F6.8	WBGene00012107	T27F6.8	T27F6.8	T27F6.8,T27F6.8.1,T27F6.8.2	6.30861	1.87154	1.77293	0.523579	N.A.	N.A.	This gene encodes a protein containing an F-box, a motif predicted to mediate protein-protein interactions either with homologs of yeast Skp-1p or with other proteins.	189005	46	36	10	15.53	4.29	8.94e-06	0.000264	0.76	0	N	N
653	F55B11.4	WBGene00010086	F55B11.4	F55B11.4	F55B11.4,F55B11.4	0.691911	4.85457	0.613079	0.210688	tail	N.A.	F55B11.4 is involved in lipid storage; F55B11.4 is expressed in the tail.	178384	42	30	12	14.8	4.29	9.11e-06	0.000269	2.54	1.81	N	Y
654	C32D5.7	WBGene00016315	C32D5.7	C32D5.7	C32D5.7,C32D5.7	0.470575	2.96601	1.79703	3.52484	N.A.	N.A.	Tiling array, RNA sequencing, and microarray studies indicate that C32D5.7 is affected by daf-12, prg-1, cco-1, jmjd-3.1, jmjd-1.2, let-418, chd-3, dpy-21, sir-2.1, fbf-1, mir-243, aak-2, daf-2, hcf-1, and nuo-6; microarray studies indicate that C32D5.7 is affected by Resveratrol, Cry5B, Sirolimus, and Allantoin; RNA sequencing and microarray studies indicate that C32D5.7 is enriched in the germ …	174047	44	36	8	15.16	4.29	9.13e-06	0.000269	0.64	1.42	Y	Y
657	cytb-5.1	WBGene00007848	cytb-5.1	C31E10.7	C31E10.7,C31E10.7:wp132,C31E10.7.1,C31E10.7.2	6.53199	6.50807	5.59065	4.75418	N.A.	N.A.	cytb-5.1 encodes a protein orthologous to cytochrome b5; a CYTB-5.1 reporter fusion protein, when expressed in the distal tip cell, exhibits perinuclear localization, consistent with localization to the endoplasmic reticulum.	181510	45	33	12	15.33	4.28	9.21e-06	0.00027	0.61	0	N	Y
658	F08B12.4	WBGene00008572	F08B12.4	F08B12.4	F08B12.4a,F08B12.4b,F08B12.4c,F08B12.4d,F08B12.4e,F08B12.4f,F08B12.4g,F08B12.4h,F08B12.4i,F08B12.4:wp40,F08B12.4d,F08B12.4f,F08B12.4h,F08B12.4i,F08B12.4b.1,F08B12.4b.2,F08B12.4g,F08B12.4c.1,F08B12.4c.2,F08B12.4e,F08B12.4a	7.48941	9.42649	9.29885	6.94808	N.A.	N.A.	F08B12.4 is localized to the nucleus.	181333	46	32	14	15.48	4.28	9.48e-06	0.000278	0.26	0.36	Y	N
659	lipl-1	WBGene00010062	lipl-1	F54F3.3	F54F3.3,F54F3.3	-2.04803	0.6853	-4.50936	-4.00038	intestine	adult Ce,larva Ce	lipl-1 is an ortholog of members of the human Lipases family including LIPF; lipl-1 is involved in lipid storage; lipl-1 is predicted to have hydrolase activity, acting on ester bonds, based on protein domain information; lipl-1 is expressed in the intestine; lipl-1 is localized to the lysosome.	179771	42	29	13	14.76	4.28	9.53e-06	0.000279	0.82	1.41	N	Y
660	F14D12.1	WBGene00017463	F14D12.1	F14D12.1	F14D12.1a,F14D12.1b,F14D12.1a:wp204,F14D12.1b:wp204,F14D12.1a,F14D12.1b	3.8725	1.24141	0.0951701	0.52041	N.A.	N.A.	F14D12.1 is an ortholog of human DOK7 (docking protein 7); microarray and RNA sequencing studies indicate that F14D12.1 is affected by zfp-1, cyc-1, sma-2, sma-4, dop-1, let-418, chd-3, and ain-2; microarray studies indicate that F14D12.1 is affected by Hydrogen sulfide, Tunicamycin, Atrazine, Fluoranthene, and Sirolimus; microarray and RNA sequencing studies indicate that F14D12.1 is enriched in…	180829	45	36	9	15.29	4.27	9.67e-06	0.000282	0.35	0.99	N	N
661	ugt-40	WBGene00017331	ugt-40	F10D2.5	F10D2.5,F10D2.5:wp142,F10D2.5	0.291612	-0.741226	-1.17331	-2.93986	N.A.	N.A.	ugt-40 is an ortholog of human UGT3A2 (UDP glycosyltransferase family 3 member A2) and UGT3A1 (UDP glycosyltransferase family 3 member A1); ugt-40 is predicted to have transferase activity, transferring hexosyl groups, based on protein domain information.	184292	34	25	9	13.22	4.27	9.76e-06	0.000285	1.15	0.67	N	N
663	F13D11.3	WBGene00017428	F13D11.3	F13D11.3	F13D11.3,F13D11.3:wp187,F13D11.3	0.947882	3.2583	5.52275	2.64566	N.A.	N.A.	F13D11.3 is an ortholog of members of the human Atypical dual specificity phosphatases family including DUSP28; F13D11.3 is predicted to have protein tyrosine/serine/threonine phosphatase activity, based on protein domain information.	180847	46	33	13	15.45	4.27	9.86e-06	0.000287	0.34	0	Y	N
664	dcar-1	WBGene00007395	dcar-1	C06H5.7	C06H5.7,C06H5.7:wp87,C06H5.7.1,C06H5.7.2	6.83051	3.18657	2.25531	1.96726	amphid neuron,ASHL,ASHR,ASIL,ASIR,hyp7 syncytium,PVQL,PVQR,uterine toroidal epithelial cell,uv1	N.A.	dcar-1 is an ortholog of human NPFFR1 (neuropeptide FF receptor 1), NPFFR2 (neuropeptide FF receptor 2) and QRFPR (pyroglutamylated RFamide peptide receptor); dcar-1 is involved in chemosensory behavior, defense response to fungus and response to wounding; dcar-1 is expressed in certain interneurons, all amphid neurons, hyp7 syncytium, uterine toroidal epithelial cell, and the uv1; dcar-1 is loca…	259679	22	18	4	10.55	4.27	9.94e-06	0.000289	0.33	1.89	N	N
665	cyp-14A3	WBGene00010707	cyp-14A3	K09A11.4	K09A11.4,K09A11.4	0.622802	-4.68504	-3.10352	-3.84318	head neuron,intestine,nervous system,PVT,rectal gland cell,tail neuron	adult Ce,larva Ce	cyp-14A3 encodes one of ~80 C. elegans cytochrome P450s: membrane-associated, heme-containing NADPH-dependent monooxygenases that catalyze the oxidative metabolism of a variety of exogenous compounds and endogenous substrates; large-scale expression studies reveal cyp-14A3 expression in the intestine and some neurons; cyp-14A3 expression is upregulated in response to the tetrachlorobiphenyl PCB52…	187185	37	27	10	13.79	4.27	9.97e-06	0.000289	0.26	0.39	N	N
666	hgo-1	WBGene00001843	hgo-1	W06D4.1	W06D4.1,W06D4.1:wp67,W06D4.1	9.15031	4.17621	3.67815	4.75955	body wall musculature,hypodermis,intestine,pharynx,vulval muscle	adult Ce,larva Ce	hgo-1 encodes a putative homogentisate 1,2-dioxygenase, orthologous to human HGD (OMIM:607474, mutated in alkaptonuria), that is required for normal resistance to hypertonic stress; HGO-1 is expressed in larval and adult hypodermis and intestine, and in larval pharynx; HGO-1 is required for the tyrosinemic phenotype of K10C2.4(RNAi) animals.	172726	45	34	11	15.24	4.26	1.04e-05	0.0003	0.19	1.36	Y	Y
667	nhr-4	WBGene00003603	nhr-4	F32B6.1	F32B6.1,F32B6.1	3.43607	1.87224	2.17284	4.18823	amphid neuron,ciliated neuron,head neuron,intestine,nervous system,neuron,pharynx,phasmid neuron,sensory neuron,tail,tail neuron	adult Ce,L2 larva Ce,L3 larva Ce,L4 larva Ce,larva Ce	nhr-4 is predicted to encode a nuclear hormone receptor (NHR); expression may peak during the late larval stages, based on mRNA expression analysis.	177839	44	33	11	15.05	4.25	1.05e-05	0.000305	0.35	0	N	N
668	tatn-1	WBGene00009628	tatn-1	F42D1.2	F42D1.2,F42D1.2	8.91424	6.45792	4.49637	3.75502	body wall musculature,hypodermis,intestine,muscle cell,pharynx,reproductive system,vulval muscle	adult Ce,larva Ce	tatn-1 encodes a putative tyrosine aminotransferase, orthologous to human TAT (OMIM:276600, mutated in type II tyrosinemia); tatn-1 is expressed in larval and adult pharynx, hypodermis, body wall muscle, and intestine, and in adult vulval muscle and reproductive system; tatn-1 is required for the tyrosinemic phenotype of fah-1(RNAi) animals.	181574	40	31	9	14.32	4.25	1.06e-05	0.000305	0.38	0.54	Y	Y
669	C17C3.3	WBGene00015889	C17C3.3	C17C3.3	C17C3.3,C17C3.3:wp104,C17C3.3	-5.10211	-0.346147	0.0820491	-5.112	N.A.	N.A.	C17C3.3 is an ortholog of human ACOT8 (acyl-CoA thioesterase 8); C17C3.3 is predicted to have acyl-CoA hydrolase activity, based on protein domain information.	182714	31	25	6	12.55	4.25	1.06e-05	0.000305	1.21	2.69	Y	Y
670	inx-11	WBGene00002133	inx-11	W04D2.3	W04D2.3a,W04D2.3b,W04D2.3b,W04D2.3a.1,W04D2.3a.2	0.57787	1.36966	2.42833	0.520712	anterior arcade cell,body wall musculature,CEPshDL,CEPshDR,CEPshVL,CEPshVR,corpus,DVC,g1AL,g1AR,g1P,g2L,g2R,head neuron,hyp8,hyp9,hyp10,hyp11,intestine,K' cell,LUAL,LUAR,pharyngeal epithelial cell,pm1,pm2,pm3,pm4,pm5,pm6,pm7,pm8,posterior arcade cell,spermatid,spermatocyte,terminal bulb,uterine muscle,uterine seam cell,uterus,virL,virR,vulval muscle	2-fold embryo Ce,3-fold embryo Ce,adult Ce,fully-elongated embryo Ce,larva Ce	inx-11 encodes a predicted member of the innexin family; expressed in the pharynx, a few head neurons, the tail hypodermis, posterior intestine and in some vulval and uterine muscles.	179710	42	32	10	14.68	4.25	1.06e-05	0.000305	0.29	0.4	N	N
671	ptr-12	WBGene00004226	ptr-12	K07A3.2	K07A3.2a,K07A3.2:wp124,K07A3.2:wp129,K07A3.2a:wp153,K07A3.2b:wp153,K07A3.2b:wp243,K07A3.2b,K07A3.2a	3.98682	2.61738	0.644155	2.54314	N.A.	N.A.	ptr-12 encodes a nematode-specific member of the sterol sensing domain (SSD) proteins, distantly paralogous to Drosophila PATCHED (PTC) and human PTCH (OMIM:601309, mutated in basal cell nevus syndrome); PTR-12 is weakly required for normal molting from L4 to adult stages growth to full size; PTR-12 is also required for normal locomotion.	171816	22	20	2	10.49	4.24	1.11e-05	0.000318	0.54	0	N	N
672	nep-4	WBGene00016896	nep-4	C53B7.7	C53B7.7,C53B7.7:wp107,C53B7.7	0.641342	2.26129	1.81259	0.938594	N.A.	N.A.	C53B7.7 encodes a neprilysin; neprilysins are thermolysin-like zinc metallopeptidases, found on the outer surface of animal cells, that negatively regulate small signalling peptides (e.g., enkephalin, tachykinin, insulin, and natriuretic peptides) by cleaving them; C53B7.7 has no clear orthologs in other organisms.	183746	45	33	12	15.15	4.23	1.15e-05	0.000331	0.42	0.44	N	N
673	spp-13	WBGene00004998	spp-13	F08F1.6	F08F1.6,F08F1.6	-0.764916	5.32436	-0.576296	-0.158218	N.A.	N.A.	spp-13 is an ortholog of human SFTPB (surfactant protein B), PSAPL1 (prosaposin-like 1 (gene/pseudogene)) and PSAP (prosaposin); RNA sequencing and microarray studies indicate that spp-13 is affected by Ethanol, Methylmercury hydroxide, D-glucose, Atrazine, Colistin, Dafa#1, adsorbable organic bromine compounds, and Sirolimus; tiling array and microarray studies indicate that spp-13 is enriched i…	184191	38	29	9	13.88	4.23	1.15e-05	0.000331	0.72	0.59	Y	N
674	F14F9.5	WBGene00017468	F14F9.5	F14F9.5	F14F9.5,F14F9.5:wp106,F14F9.5	0.904557	2.75189	5.05294	1.9653	N.A.	N.A.	F14F9.5 is involved in cellular response to DNA damage stimulus.	184485	37	30	7	13.68	4.23	1.18e-05	0.000338	1.56	0	N	N
675	C17C3.15	WBGene00015896	C17C3.15	C17C3.15	C17C3.15,C17C3.15	4.11817	1.74603	2.21749	-2.41485	N.A.	N.A.	Microarray, tiling array, and RNA sequencing studies indicate that C17C3.15 is affected by cyc-1, daf-16, sma-2, nhr-62, eat-2, emr-1, lem-2, bar-1, hlh-30, prg-1, clk-1, pgl-1, pgl-3, glh-4, glh-1, daf-2, jmjd-3.1, dop-1, and dpy-21; RNA sequencing and microarray studies indicate that C17C3.15 is affected by 1-methylnicotinamide, Sodium arsenite, Chlorpyrifos, and Diazinon.	3565825	7	7	0	5.83	4.23	1.19e-05	0.000341	0.63	0.13	N	N
676	F37C4.5	WBGene00018145	F37C4.5	F37C4.5	F37C4.5a,F37C4.5b,F37C4.5a.1,F37C4.5a.2,F37C4.5a.3,F37C4.5b	8.86241	8.09414	8.08132	7.58721	N.A.	N.A.	RNA sequencing and microarray studies indicate that F37C4.5 is affected by 1-methylnicotinamide, D-glucose, Testosterone, Resveratrol, Deoxyglucose, Cry5B, Quercetin, Humic substances, Paraquat, and Sirolimus; RNA sequencing and microarray studies indicate that F37C4.5 is enriched in the germ line and muscle cell and in neurons including ASER, PLM, I5, DA, SAB, and retrovesicular ganglion.	177146	42	32	10	14.59	4.22	1.2e-05	0.000343	0	0.23	N	N
677	vhp-1	WBGene00006923	vhp-1	F08B1.1	F08B1.1a,F08B1.1b,F08B1.1c,F08B1.1a.1,F08B1.1a.2,F08B1.1a.3,F08B1.1b.1,F08B1.1b.2,F08B1.1c.1,F08B1.1c.2,F08B1.1c.3	6.00026	6.14577	5.5001	6.39025	hypodermis,intestine,neuron,pharynx,vulva	adult Ce,embryo Ce,L1 larva Ce,L2 larva Ce,L3 larva Ce,L4 larva Ce	vhp-1 encodes a MAP kinase phosphatase (MKP); VHP-1 activity is required for regulation of the KGB-1/JNK-like MAPK-mediated stress response pathway.	173904	46	35	11	15.29	4.22	1.21e-05	0.000346	0.18	0.6	N	N
678	Y105C5A.13	WBGene00013637	Y105C5A.13	Y105C5A.13	Y105C5A.13a,Y105C5A.13b,Y105C5A.13:wp114,Y105C5A.13a,Y105C5A.13b	-0.59791	0.670433	-5.22015	-4.88784	N.A.	N.A.	RNA sequencing, tiling array, and microarray studies indicate that Y105C5A.13 is affected by aak-2, daf-12, nhr-114, prp-8, ahr-1, drh-3, prg-1, hlh-30, clk-1, wrn-1, lin-35, glp-1, daf-16, elt-2, hsf-1, dpy-21, hrp-2, and daf-2; microarray and RNA sequencing studies indicate that Y105C5A.13 is affected by Copper sulfate, Methylmercury hydroxide, Rotenone, Tunicamycin, and Neurotoxins.	178441	26	18	8	11.38	4.22	1.23e-05	0.000349	0.8	2.04	N	Y
679	C08E3.1	WBGene00015593	C08E3.1	C08E3.1	C08E3.1,C08E3.1	-2.67065	6.02295	-3.38565	-2.49554	N.A.	N.A.	Microarray, RNA sequencing, and tiling array studies indicate that C08E3.1 is affected by zfp-1, aak-2, age-1, nhr-8, emr-1, lem-2, ubc-9, clk-1, bar-1, daf-16, elt-2, jmjd-3.1, jmjd-1.2, hsf-1, dpy-21, and elli-1; RNA sequencing and microarray studies indicate that C08E3.1 is affected by Methylmercury hydroxide, Mercuric Chloride, Tunicamycin, Acrylamide, and Colistin; RNA sequencing and microar…	182395	26	18	8	11.38	4.22	1.23e-05	0.000348	0.49	0.42	N	N
680	cab-1	WBGene00000277	cab-1	C23H4.1	C23H4.1,C23H4.1.1,C23H4.1.2,C23H4.1.3,C23H4.1.4	7.61558	6.97485	6.97827	10.6391	N.A.	N.A.	Novel protein which has a C-terminal motif weakly homologous to mouse NPDC-1 and is involved in synaptic regulation; it is expressed in various neurons including ventral cord and tail ganglion neurons; it physically interacts with AEX-3, which is a guanine nucleotide exchange factor for the Rab3 GTPase.	181382	45	34	11	15.1	4.22	1.23e-05	0.000349	0.34	0.61	Y	N
681	cyp-34A7	WBGene00015042	cyp-34A7	B0213.12	B0213.12,B0213.12	0.401238	-0.675506	-1.7777	-3.25071	N.A.	N.A.	cyp-34A7 is an ortholog of human CYP21A2 (cytochrome P450 family 21 subfamily A member 2) and members of the CYP2 (Cytochrome P4502) family including CYP2E1; cyp-34A7 is predicted to have heme binding activity, iron ion binding activity, and oxidoreductase activity, acting on paired donors, with incorporation or reduction of molecular oxygen, based on protein domain information.	181849	41	31	10	14.39	4.22	1.24e-05	0.000351	0.44	0	N	N
682	Y54G11A.7	WBGene00013216	Y54G11A.7	Y54G11A.7	Y54G11A.7,Y54G11A.7:wp92,Y54G11A.7	3.21924	4.06109	3.39751	4.1744	head neuron,hypodermis,intestine,nerve ring,nervous system,pharyngeal-intestinal valve,pharynx,rectal epithelium,tail neuron,ventral cord neuron	adult Ce,larva Ce	Y54G11A.7 is an ortholog of human TTC38 (tetratricopeptide repeat domain 38); Y54G11A.7 is involved in embryo development; Y54G11A.7 is expressed in the pharynx, hypodermis, nervous system, pharyngeal-intestinal valve, and the intestine.	175084	46	35	11	15.27	4.22	1.24e-05	0.000351	1.97	0.73	N	N
683	cyp-13B1	WBGene00008519	cyp-13B1	F02C12.5	F02C12.5,F02C12.5a:wp252,F02C12.5b:wp144,F02C12.5	-1.44179	2.34571	-2.61402	-0.701647	N.A.	N.A.	cyp-13B1 encodes one of ~80 C. elegans cytochrome P450s: membrane-associated, heme-containing NADPH-dependent monooxygenases that catalyze the oxidative metabolism of a variety of exogenous compounds and endogenous substrates.	181462	26	19	7	11.37	4.22	1.25e-05	0.000352	0.15	0.84	Y	Y
684	aldo-1	WBGene00011474	aldo-1	T05D4.1	T05D4.1,T05D4.1.1,T05D4.1.2	7.87859	8.19379	10.066	9.92234	anal depressor muscle,body wall musculature,dorsal nerve cord,gonad,head neuron,intestinal muscle,lateral nerve cord,mu_int_L,mu_int_R,nerve ring,nervous system,neuron,reproductive system,spermathecal-uterine junction,spermathecal-uterine valve cell,tail neuron,ventral cord neuron,ventral nerve cord,vulva,vulval muscle	adult Ce,larva Ce	aldo-1 is orthologous to the human gene ALDOLASE A, FRUCTOSE-BISPHOSPHATE (ALDOA; OMIM:103850), which when mutated leads to aldolase A deficiency.	176788	46	37	9	15.26	4.21	1.26e-05	0.000356	0.19	0.29	N	N
685	F18C5.10	WBGene00017563	F18C5.10	F18C5.10	F18C5.10,F18C5.10.1,F18C5.10.2	6.49984	3.91125	5.6061	5.70712	N.A.	N.A.	Tiling array, microarray, and RNA sequencing studies indicate that F18C5.10 is affected by daf-16, sam-10, egl-5, daf-12, emr-1, lem-2, bar-1, gld-2, daf-2, cco-1, jmjd-3.1, jmjd-1.2, mes-2, unc-39, eri-1, dcr-1, ain-1, ain-2, tdp-1, and nasp-1; RNA sequencing and microarray studies indicate that F18C5.10 is affected by 1-methylnicotinamide, Methylmercuric chloride, Atrazine, Cry5B, Humic substan…	174082	22	18	4	10.42	4.21	1.27e-05	0.000358	0.68	1.6	Y	N
686	C24G6.2	WBGene00016059	C24G6.2	C24G6.2	C24G6.2a,C24G6.2b,C24G6.2a,C24G6.2b	4.00493	3.62689	1.79803	0.662256	N.A.	N.A.	C24G6.2 is an ortholog of human MST1R (macrophage stimulating 1 receptor) and Met (MET proto-oncogene, receptor tyrosine kinase); C24G6.2 is predicted to have protein tyrosine kinase activity, based on protein domain information.	178936	43	34	9	14.72	4.21	1.28e-05	0.000361	0.12	0.46	Y	N
687	gpd-1	WBGene00001683	gpd-1	T09F3.3	T09F3.3,T09F3.3.1,T09F3.3.2	4.23554	4.00015	4.68807	1.78624	germ line	adult Ce,embryo Ce,L1 larva Ce,L2 larva Ce,L3 larva Ce,L4 larva Ce	gpd-1 encodes one of four C. elegans glyceraldehyde-3-phosphate dehydrogenases (GAPDHs); by homology, GPD-1 is predicted to reversibly catalyze the oxidation and phosphorylation of glyceraldehyde-3-phosphate to 1,3-diphosphoglycerate during glycolysis; GPD-1 is required for embryogenesis, normal body morphology, and gonad development; in C. elegans, GPD-1 and GPD-4 constitute the minor GAPDH isoe…	174603	46	35	11	15.24	4.21	1.29e-05	0.000363	0.56	0	Y	N
689	alh-5	WBGene00000111	alh-5	T08B1.3	T08B1.3,T08B1.3	4.67404	2.82918	-0.952298	-2.19507	N.A.	N.A.	alh-5 is an ortholog of members of the human ALDH (Aldehyde dehydrogenases) family including ALDH3B2; alh-5 is predicted to have aldehyde dehydrogenase [NAD(P)+] activity, based on protein domain information.	178680	34	25	9	13.01	4.2	1.33e-05	0.000372	0.68	1	Y	Y
690	C14H10.1	WBGene00007591	zipt-13	C14H10.1	C14H10.1,C14H10.1:wp178,C14H10.1	5.98464	4.42945	4.9147	3.49595	N.A.	N.A.	zipt-13 is an ortholog of human SLC39A13 (solute carrier family 39 member 13); zipt-13 is predicted to have metal ion transmembrane transporter activity, based on protein domain information.	181233	46	31	15	15.21	4.2	1.34e-05	0.000376	0.94	0.17	N	N
692	prk-1	WBGene00004182	prk-1	C06E8.3	C06E8.3a,C06E8.3b,C06E8.3c,C06E8.3d,C06E8.3d,C06E8.3b,C06E8.3c,C06E8.3a	3.96318	4.053	5.00072	4.74005	head neuron,intestine,nervous system,tail neuron	adult Ce,larva Ce	prk-1 is an ortholog of human PIM2 (Pim-2 proto-oncogene, serine/threonine kinase), PIM1 (Pim-1 proto-oncogene, serine/threonine kinase) and PIM3 (Pim-3 proto-oncogene, serine/threonine kinase); prk-1 is predicted to have ATP binding activity and protein kinase activity, based on protein domain information; prk-1 is expressed in the nervous system and the intestine.	175980	32	25	7	12.59	4.19	1.37e-05	0.000381	0.64	0	N	N
693	emre-1	WBGene00008980	emre-1	F20D1.10	F20D1.10,F20D1.10.1,F20D1.10.2,F20D1.10.3	4.79897	3.87108	5.36863	4.8701	body wall musculature,nervous system,tail neuron	adult Ce,larva Ce	emre-1 is expressed in the nervous system and the body wall musculature; emre-1 is localized to the mitochondrion.	181594	22	19	3	10.38	4.19	1.37e-05	0.000381	0.27	0.61	Y	N
694	memo-1	WBGene00016500	memo-1	C37C3.8	C37C3.8a,C37C3.8b,C37C3.8c,C37C3.8a:wp90,C37C3.8a.1,C37C3.8a.2,C37C3.8b.1,C37C3.8b.2,C37C3.8c	5.02093	4.36611	4.56938	5.96675	N.A.	N.A.	memo-1 is an ortholog of human MEMO1 (mediator of cell motility 1); microarray, tiling array, and RNA sequencing studies indicate that memo-1 is affected by zfp-1, sma-2, sma-4, daf-12, wdr-23, eat-2, clk-1, htz-1, ham-3, sir-2.1, alg-1, daf-2, hcf-1, and ain-2; microarray studies indicate that memo-1 is affected by Tunicamycin, Resveratrol, Atrazine, Cry5B, Chlorpyrifos, Diazinon, Humic substanc…	179163	46	38	8	15.18	4.19	1.39e-05	0.000386	0.36	0.26	N	N
695	dhs-12	WBGene00000975	dhs-12	K08F4.9	K08F4.9,K08F4.9	6.57018	4.18542	5.0737	3.69872	N.A.	N.A.	dhs-12 encodes a predicted short-chain dehydrogenase.	177888	46	34	12	15.17	4.19	1.41e-05	0.00039	1.41	0.17	Y	N
696	flp-24	WBGene00016028	flp-24	C24A1.1	C24A1.1,C24A1.1:wp88,C24A1.1:wp142,C24A1.1.1,C24A1.1.2	2.42137	5.48395	3.90271	7.91076	ALA	N.A.	flp-24 is involved in embryo development; flp-24 is expressed in certain interneurons.	182824	45	33	12	14.99	4.19	1.43e-05	0.000395	0.34	0.23	N	N
698	K02E7.6	WBGene00019311	K02E7.6	K02E7.6	K02E7.6:wp93,K02E7.6:wp251	-0.319221	0.772319	-3.15181	-1.6705	N.A.	N.A.	RNA sequencing and microarray studies indicate that K02E7.6 is affected by Methylmercury hydroxide, 1-methylnicotinamide, Multi-walled carbon nanotubes, D-glucose, Bisphenol S, Progesterone, and Ag nanoparticles; microarray, tiling array, and RNA sequencing studies indicate that K02E7.6 is enriched in the hypodermis, germ line, gon_male_dtc posterior, gon_male_dtc anterior, Z1.p, and Z4.a and in …	173488	42	29	13	14.45	4.18	1.45e-05	0.0004	1.03	1.73	Y	Y
700	F57C2.5	WBGene00010197	F57C2.5	F57C2.5	F57C2.5a,F57C2.5b,F57C2.5c,F57C2.5a:wp246,F57C2.5c,F57C2.5a.1,F57C2.5a.2,F57C2.5b	5.36789	3.9552	4.47041	3.47987	N.A.	N.A.	F57C2.5 is an ortholog of human APMAP (adipocyte plasma membrane associated protein); F57C2.5 is predicted to have strictosidine synthase activity, based on protein domain information; F57C2.5 is localized to the sarcoplasmic reticulum.	175112	44	35	9	14.79	4.18	1.47e-05	0.000406	0.11	0	Y	Y
701	R09A8.5	WBGene00011154	R09A8.5	R09A8.5	R09A8.5,R09A8.5	0.965838	3.09245	3.3236	4.45924	anal depressor muscle,anal sphincter muscle,body wall musculature,hyp8,hyp9,hyp10,hyp11,pharyngeal muscle cell,virL,virR	adult Ce,embryo Ce,L1 larva Ce,L2 larva Ce,L3 larva Ce,L4 larva Ce	R09A8.5 is expressed in the anal depressor muscle, hyp11, hyp10, hyp9, hyp8, virR, virL, pharyngeal muscle cell, anal sphincter muscle, and the body wall musculature.	187724	41	35	6	14.25	4.18	1.48e-05	0.000407	0.98	0	Y	N
702	F20D6.11	WBGene00017640	F20D6.11	F20D6.11	F20D6.11,F20D6.11	4.22312	3.5384	3.97218	4.85371	anal depressor muscle,body wall musculature,pharynx,reproductive system,spermatheca,tail	adult Ce,larva Ce	F20D6.11 encodes a putative flavin-adenine dinucleotide (FAD)-binding oxidoreductase orthologous to human AIFM3 (AIFL), and paralogous to WAH-1 and mammalian PDCD8; F20D6.11 is expressed in pharynx, anal depressor and body wall muscles, the reproductive system (including spermatheca), and unidentified tail cells; given its orthology to AIFM3, F20D6.11 may promote apoptosis.	179196	45	33	12	14.96	4.18	1.48e-05	0.000407	1.62	1.46	Y	N
703	flp-7	WBGene00001450	flp-7	F49E10.3	F49E10.3,F49E10.3	4.2058	2.85712	3.70266	7.27748	ALA,AVG,nerve ring,PDA,PHAL,PHAR,PHBL,PHBR,PVWL,PVWR,RICL,RICR,RMDVL,RMDVR,SAADL,SAADR,SAAVL,SAAVR,SMDVL,SMDVR	all stages Ce	flp-7 encodes an MVRFamide-containing peptide that, upon injection into A. suum, produces paralysis and loss of locomotory waveforms, increased body length, and decreased cAMP production.	180854	44	34	10	14.78	4.18	1.49e-05	0.000408	0	0	N	N
704	mec-3	WBGene00003167	mec-3	F01D4.6	F01D4.6a,F01D4.6c,F01D4.6:wp49,F01D4.6b:wp243,F01D4.6a,F01D4.6c	-0.857171	-0.125996	-1.06555	3.77839	AIZL,AIZR,ALML,ALMR,AVM,FLPL,FLPR,head neuron,PLML,PLMR,PVDL,PVDR,PVM,touch receptor neuron,ventral nerve cord,vulva	adult Ce,fully-elongated embryo Ce,L1 larva Ce,L2 larva Ce,L3 larva Ce,L4 larva Ce	mec-3 encodes a founding member of the LIM (Lin-11, Isl-1, Mec-3) homeodomain family of transcriptional regulators; during C. elegans development, MEC-3 activity is required for proper differentiation and maturation of the mechanosensory neurons; MEC-3 is expressed in the mechanosensory neurons, where initiation of expression is dependent upon the UNC-86 homeodomain protein and maintenance of exp…	177938	35	26	9	13.12	4.17	1.52e-05	0.000415	1.33	0	N	N
705	col-124	WBGene00000698	col-124	C24F3.6	C24F3.6,C24F3.6.1,C24F3.6.2	11.6084	8.97272	9.65143	7.45326	N.A.	N.A.	col-124 is an ortholog of human SFTPD (surfactant protein D); col-124 is a structural constituent of cuticle, based on protein domain information.	177901	16	12	4	8.77	4.17	1.53e-05	0.000418	0.26	0.54	N	N
706	T23F2.5	WBGene00020738	T23F2.5	T23F2.5	T23F2.5,T23F2.5	6.17611	5.926	7.39813	5.32728	N.A.	N.A.	Microarray and RNA sequencing studies indicate that T23F2.5 is affected by cyc-1, sma-2, aak-2, htz-1, lin-35, npr-1, hsf-1, let-418, chd-3, sir-2.1, dcr-1, lin-54, and nuo-6; microarray studies indicate that T23F2.5 is affected by Humic substances and Sirolimus; tiling array, RNA sequencing, and microarray studies indicate that T23F2.5 is enriched in the hypodermis, germ line, and intestine and …	180823	46	34	12	15.1	4.17	1.54e-05	0.000422	0	0.13	N	N
707	Y54G2A.11	WBGene00021876	Y54G2A.11	Y54G2A.11	Y54G2A.11a,Y54G2A.11b,Y54G2A.11b,Y54G2A.11a	6.19836	4.011	4.60144	4.99134	N.A.	N.A.	Microarray and RNA sequencing studies indicate that Y54G2A.11 is affected by Heme, 1-methylnicotinamide, Rotenone, D-glucose, Chlorpyrifos, Diazinon, Quercetin, Hydrolyzable Tannins, Humic substances, Dafa#1, and Sirolimus; chronogram analysis, tiling array, RNA sequencing, and microarray studies indicate that Y54G2A.11 is enriched in the intestine, ventral nerve cord, hypodermis, germ line, and …	177058	22	17	5	10.31	4.17	1.55e-05	0.000423	1	0	N	N
708	hlh-33	WBGene00021446	hlh-33	Y39A3CR.6	Y39A3CR.6,Y39A3CR.6	3.63762	2.18046	2.51361	1.60447	N.A.	N.A.	hlh-33 is predicted to have protein dimerization activity, based on protein domain information.	189728	25	19	6	11.01	4.17	1.55e-05	0.000423	0.44	0	N	N
709	F42F12.3	WBGene00009635	F42F12.3	F42F12.3	F42F12.3,F42F12.3	1.89709	3.0781	1.76098	1.56139	N.A.	N.A.	F42F12.3 is an ortholog of human SRD5A1 (steroid 5 alpha-reductase 1) and SRD5A2 (steroid 5 alpha-reductase 2); F42F12.3 is involved in innate immune response; F42F12.3 is predicted to have 3-oxo-5-alpha-steroid 4-dehydrogenase activity, based on protein domain information.	185670	43	36	7	14.56	4.16	1.59e-05	0.000433	0.87	0	Y	Y
710	cyp-13A12	WBGene00008810	cyp-13A12	F14F7.3	F14F7.3,F14F7.3	-4.07116	0.732225	-5.15368	-3.46333	marginal cell	N.A.	cyp-13A12 encodes one of ~80 C. elegans cytochrome P450s: membrane-associated, heme-containing NADPH-dependent monooxygenases that catalyze the oxidative metabolism of a variety of exogenous compounds and endogenous substrates.	184473	41	32	9	14.2	4.16	1.6e-05	0.000433	0	0.74	N	Y
711	hda-5	WBGene00009663	hda-5	F43G6.11	F43G6.11,F43G6.11b:wp231,F43G6.11	3.71806	1.67761	-1.06479	-1.00522	N.A.	N.A.	hda-5 is an ortholog of human HDAC10 (histone deacetylase 10); RNA sequencing and microarray studies indicate that hda-5 is affected by Rotenone, Mianserin, Cry5B, Humic substances, and Colistin; tiling array, RNA sequencing, and microarray studies indicate that hda-5 is enriched in the intestine and in neurons including dopaminergic, I5, DA, SAB, and retrovesicular ganglion.	174811	42	29	13	14.38	4.16	1.6e-05	0.000433	1.82	0.13	N	N
712	C28H8.4	WBGene00016195	C28H8.4	C28H8.4	C28H8.4,C28H8.4.1,C28H8.4.2	6.39324	5.65784	5.99709	4.58248	N.A.	N.A.	C28H8.4 is an ortholog of human KDELR3 (KDEL endoplasmic reticulum protein retention receptor 3), KDELR1 (KDEL endoplasmic reticulum protein retention receptor 1) and KDELR2 (KDEL endoplasmic reticulum protein retention receptor 2); C28H8.4 is involved in embryo development; C28H8.4 is predicted to have ER retention sequence binding activity, based on protein domain information.	175833	46	36	10	15.07	4.16	1.6e-05	0.000434	0.9	0.8	N	N
713	acs-13	WBGene00022037	acs-13	Y65B4BL.5	Y65B4BL.5a,Y65B4BL.5b,Y65B4BL.5c,Y65B4BL.5c,Y65B4BL.5a,Y65B4BL.5b	6.20519	6.97053	5.81424	5.83325	body wall musculature,head,hypodermis,intestine,pharynx	adult Ce,larva Ce	acs-13 is an ortholog of human ACSL5 (acyl-CoA synthetase long-chain family member 5), ACSL6 (acyl-CoA synthetase long-chain family member 6) and ACSL1 (acyl-CoA synthetase long-chain family member 1); acs-13 is predicted to have catalytic activity, based on protein domain information; acs-13 is expressed in the pharynx, hypodermis, head, intestine, and the body wall musculature.	171643	42	33	9	14.37	4.16	1.61e-05	0.000434	1.21	1.58	Y	Y
714	C54D10.13	WBGene00045400	C54D10.13	C54D10.13	C54D10.13,C54D10.13	-1.80493	2.00075	-1.61357	-1.50024	N.A.	N.A.	Microarray and RNA sequencing studies indicate that C54D10.13 is affected by nhr-114, htz-1, lin-35, daf-2, npr-1, hsf-1, mir-60, skn-1, daf-16, and dpy-21; tiling array and RNA sequencing studies indicate that C54D10.13 is enriched in the intestine, pharyngeal muscle cell, Z4, and Z1 and in the PVD and OLL neurons.	6418712	9	9	0	6.51	4.16	1.62e-05	0.000437	1.6	1.17	Y	Y
715	R07G3.8	WBGene00019944	R07G3.8	R07G3.8	R07G3.8,R07G3.8	3.22034	3.08922	3.62549	4.32435	dorsal nerve cord,head neuron,nervous system,neuron,reproductive system,tail neuron,ventral cord neuron,ventral nerve cord,vulva,vulval muscle	adult Ce,fully-elongated embryo Ce,L1 larva Ce,L2 larva Ce,L3 larva Ce,L4 larva Ce	R07G3.8 is an ortholog of human FAM49A (family with sequence similarity 49 member A) and FAM49B (family with sequence similarity 49 member B); R07G3.8 is expressed in the nervous system and the reproductive system.	174234	45	36	9	14.88	4.15	1.64e-05	0.000442	0.29	0	Y	N
716	gstk-2	WBGene00017054	gstk-2	D2024.7	D2024.7,D2024.7	2.66969	3.18579	2.4119	1.14409	body wall musculature,intestine,pharynx	adult Ce,elongating embryo Ce,fully-elongated embryo Ce,L1 larva Ce,L2 larva Ce,L3 larva Ce,L4 larva Ce	gstk-2 encodes one of two C. elegans kappa class glutathione transferases; while gstk-2(RNAi) animals exhibit no obvious developmental or morphological abnormalities, animals doubly mutant for gstk-2 and gstk-1 exhibit decreased respiration and a lower concentration of the monounsaturated fatty acid cis-vaccenic acid; GSTK-2 is expressed primarily in the pharynx, muscles, and epidermis and locali…	177498	45	35	10	14.88	4.15	1.64e-05	0.000443	1.26	1.19	Y	N
717	T02C5.1	WBGene00020158	T02C5.1	T02C5.1	T02C5.1a,T02C5.1b,T02C5.1a,T02C5.1b	3.94434	6.67019	3.52713	3.44962	N.A.	N.A.	The T02C5.1 gene encodes a protein that may be involved in apoptosis; it has some similarity to the tumor necrosis factor (TNF) receptor of vertebrates.	180568	40	30	10	13.99	4.15	1.65e-05	0.000444	0.29	1.52	N	N
718	npa-1	WBGene00003786	npa-1	VC5.3	VC5.3a,VC5.3b,VC5.3c:wp252,VC5.3a,VC5.3b	4.49039	8.3937	1.96356	4.97897	N.A.	N.A.	npa-1 encodes a large polyprotein precursor that is posttranslationally cleaved to multiple units of ~14.5kDa, each of which is a strong binding protein for fatty acids and retinol (Vitamin A); the lipid binding sites of NPA-1-derived peptides are unusually apolar; NPA-1-derived peptides probably are carrier proteins that enable distribution of these lipids within nematodes; NPA-1-derived peptide…	179095	45	32	13	14.86	4.15	1.68e-05	0.00045	0.65	2.53	Y	Y
719	aakg-5	WBGene00011276	aakg-5	R53.7	R53.7a,R53.7b,R53.7a.1,R53.7a.2,R53.7b	4.51441	4.20196	4.74323	4.93473	excretory cell,gonadal sheath cell,intestine,nerve ring neuron,neuron,pharyngeal epithelial cell,pharyngeal neuron,phasmid sheath cell,phasmid socket cell,preanal ganglion,rectal epithelium,rectal valve cell,seam cell,sensory neuron,spermatheca,ventral cord neuron,vulva	N.A.	aakg-5 encodes one of five C. elegans AMP kinase (AMPK) gamma regulatory subunits.	174556	46	32	14	15.03	4.15	1.68e-05	0.000452	0.6	0.45	Y	Y
720	K02A6.3	WBGene00019294	K02A6.3	K02A6.3	K02A6.3a,K02A6.3b,K02A6.3b:wp128,K02A6.3b.1,K02A6.3b.2,K02A6.3b.3,K02A6.3a	3.77251	2.8173	4.01037	4.27895	N.A.	N.A.	This gene encodes a protein containing an F-box, a motif predicted to mediate protein-protein interactions either with homologs of yeast Skp-1p or with other proteins.	181077	43	33	10	14.51	4.15	1.69e-05	0.000453	0.6	0.61	Y	Y
721	T19D12.2	WBGene00020577	T19D12.2	T19D12.2	T19D12.2a,T19D12.2b,T19D12.2c,T19D12.2:wp94,T19D12.2d:wp142,T19D12.2a.1,T19D12.2a.2,T19D12.2c.1,T19D12.2c.2,T19D12.2c.3,T19D12.2b.1,T19D12.2b.2	4.20316	2.02508	-0.887841	0.95668	N.A.	N.A.	T19D12.2 is involved in embryo development and reproduction.	174099	45	31	14	14.84	4.14	1.73e-05	0.000462	1.55	2.88	Y	Y
722	F35B12.9	WBGene00009388	F35B12.9	F35B12.9	F35B12.9,F35B12.9	6.39105	4.50336	4.28768	0.161009	N.A.	N.A.	Microarray and RNA sequencing studies indicate that F35B12.9 is affected by cyc-1, sma-2, sma-4, nhr-114, tatn-1, daf-2, hpk-1, cco-1, jmjd-3.1, jmjd-1.2, ain-1, dpy-9, dpy-10, osm-8, octr-1, mir-35, and tbx-2; RNA sequencing and microarray studies indicate that F35B12.9 is affected by 1-methylnicotinamide, Rotenone, D-glucose, Humic substances, and Allantoin; tiling array and RNA sequencing stud…	179591	42	33	9	14.32	4.14	1.73e-05	0.000461	0.15	0.13	N	N
723	slc-17.7	WBGene00022788	slc-17.7	ZK682.2	ZK682.2,ZK682.2.1,ZK682.2.2	3.85918	3.24293	4.47862	5.8357	N.A.	N.A.	slc-17.7 is an ortholog of members of the human SLC (Solute carriers) family including SLC17A3; slc-17.7 is involved in lipid storage.	179308	42	33	9	14.31	4.14	1.73e-05	0.000463	0.57	0.43	N	N
724	snt-4	WBGene00004924	snt-4	T23H2.2	T23H2.2,T23H2.2	6.10954	4.96764	5.48712	9.83009	dorsal nerve cord,head neuron,intestine,lateral nerve cord,nerve ring,nervous system,neuron,tail neuron,ventral cord neuron	adult Ce,larva Ce	snt-4 is an ortholog of human Syt4 (synaptotagmin 4) and SYT11 (synaptotagmin 11); snt-4 is expressed in the nervous system and the intestine.	172346	42	29	13	14.31	4.14	1.74e-05	0.000463	0.26	0	N	N
725	C35C5.8	WBGene00007957	C35C5.8	C35C5.8	C35C5.8a,C35C5.8b,C35C5.8b:wp102,C35C5.8a,C35C5.8b	3.34958	0.543886	-1.01589	-0.25427	N.A.	N.A.	RNA sequencing and microarray studies indicate that C35C5.8 is affected by Rotenone, Tunicamycin, Ethanol, D-glucose, Acrylamide, Chlorpyrifos, Diazinon, Cry5B, Quercetin, single-walled carbon nanotubes, Colistin, and Sirolimus; tiling array studies indicate that C35C5.8 is enriched in the hypodermis and in the dopaminergic neurons.	181342	43	30	13	14.49	4.14	1.74e-05	0.000463	1.09	0.4	Y	Y
726	C44E12.1	WBGene00016657	C44E12.1	C44E12.1	C44E12.1,C44E12.1	4.70672	1.61149	2.37858	1.21651	N.A.	N.A.	C44E12.1 is predicted to have hydrolase activity, based on protein domain information.	181023	38	28	10	13.58	4.14	1.76e-05	0.000467	0.98	0.68	N	N
727	spp-8	WBGene00004993	spp-8	C28C12.5	C28C12.5,C28C12.5	4.52357	4.85296	-0.219376	1.12414	N.A.	N.A.	spp-8 is an ortholog of human PSAP (prosaposin) and PSAPL1 (prosaposin-like 1 (gene/pseudogene)); RNA sequencing and microarray studies indicate that spp-8 is affected by 1-methylnicotinamide, Mianserin, D-glucose, Progesterone, Deoxyglucose, Atrazine, Chlorpyrifos, Humic substances, single-walled carbon nanotubes, and Sirolimus; sage analysis, microarray, tiling array, and RNA sequencing studies…	177652	46	32	14	14.99	4.13	1.78e-05	0.000472	0.84	1.69	N	Y
728	H19N07.3	WBGene00010407	H19N07.3	H19N07.3	H19N07.3a,H19N07.3b,H19N07.3a.1,H19N07.3a.2,H19N07.3a.3,H19N07.3b.1,H19N07.3b.2	4.43543	2.88728	1.92537	4.3168	somatic cell	N.A.	H19N07.3 is expressed in the somatic cell; H19N07.3 is localized to the nucleus.	179539	44	35	9	14.61	4.13	1.85e-05	0.000489	0.61	0.36	Y	Y
729	dmd-7	WBGene00019521	dmd-7	K08B12.2	K08B12.2a,K08B12.2b,K08B12.2a,K08B12.2b	6.5976	4.30949	4.88181	4.7996	body wall musculature,excretory cell,hypodermis,intestine,pharynx,rectum,vulval muscle	adult Ce,elongating embryo Ce,fully-elongated embryo Ce,L1 larva Ce,L2 larva Ce,L3 larva Ce,L4 larva Ce	dmd-7 is an ortholog of human DMRT2 (doublesex and mab-3 related transcription factor 2), DMRT3 (doublesex and mab-3 related transcription factor 3), DMRTA2 (DMRT like family A2), DMRTC1B (DMRT like family C1B), DMRTC2 (DMRT like family C2), DMRTB1 (DMRT like family B with proline rich C-terminal 1) and DMRTA1 (DMRT like family A1); dmd-7 is predicted to have sequence-specific DNA binding activit…	179012	45	34	11	14.77	4.12	1.89e-05	0.000501	0.72	0.13	Y	Y
730	F16B4.5	WBGene00017507	F16B4.5	F16B4.5	F16B4.5a,F16B4.5b,F16B4.5b:wp249,F16B4.5b,F16B4.5a	1.73287	1.7092	2.62376	4.0246	N.A.	N.A.	F16B4.5 is involved in embryo development, nematode larval development and reproduction.	178647	41	32	9	14.06	4.12	1.92e-05	0.000508	0.29	0	N	N
731	hrg-2	WBGene00010473	hrg-2	K01D12.14	K01D12.14,K01D12.14:wp141,K01D12.14	-3.63181	0.721661	-1.34608	-1.69905	hypodermis	N.A.	hrg-2 is an ortholog of human FAXC (failed axon connections); hrg-2 exhibits heme binding activity; hrg-2 is expressed in the hypodermis.	24104699	26	19	7	11.1	4.11	1.95e-05	0.000515	0.34	0.25	N	N
733	dlhd-1	WBGene00020741	dlhd-1	T23F4.3	T23F4.3,T23F4.3	-1.89354	-0.311267	-4.11384	-3.3988	N.A.	N.A.	dlhd-1 is predicted to have hydrolase activity, based on protein domain information.	188808	38	27	11	13.46	4.1	2.08e-05	0.000547	0.49	1.58	Y	N
734	dhs-30	WBGene00000993	dhs-30	T25G12.7	T25G12.7,T25G12.7:wp129,T25G12.7	3.75905	4.57891	4.1742	2.96603	N.A.	N.A.	dhs-30 encodes a member of the short-chain dehydrogenases/reductases family (SDR) homologous to HSD, which when mutated leads to cortisol 11-beta ketoreductase deficiency (OMIM:218030).	181761	42	34	8	14.17	4.1	2.08e-05	0.000548	1.36	1	Y	Y
735	F35F10.5	WBGene00018055	F35F10.5	F35F10.5	F35F10.5,F35F10.5:wp251,F35F10.5	-4.93557	0.505901	1.39449	-2.03538	N.A.	N.A.	RNA sequencing and microarray studies indicate that F35F10.5 is affected by wdr-23, eat-2, nhr-62, ubc-9, clk-1, wrn-1, tdp-1, daf-2, glp-1, skn-1, jmjd-3.1, jmjd-1.2, dop-1, hsf-1, daf-16, sir-2.1, and dcr-1; RNA sequencing and microarray studies indicate that F35F10.5 is affected by Ethanol, Tunicamycin, D-glucose, Humic substances, and Sirolimus; tiling array, RNA sequencing, and microarray st…	185310	26	19	7	11.06	4.1	2.1e-05	0.00055	0.67	0	N	N
736	ensa-1	WBGene00010730	ensa-1	K10C3.2	K10C3.2,K10C3.2	6.05643	5.32964	5.69777	6.59683	N.A.	N.A.	ensa-1 encodes the C. elegans ortholog of alpha-endosulfine, a conserved family of cAMP-regulated phosphoproteins; loss of ensa-1 activity results in viable and fertile animals with only slight cell cycle delays in the embryonic blastomeres AB and P1; when expressed in Xenopus oocytes, however, a phosphomimetic ENSA-1 mutant is able to suppress activity of the PP2A/B55 phosphatase.	172837	31	26	5	12.11	4.1	2.1e-05	0.00055	0.41	1.27	N	N
737	bir-2	WBGene00000250	bir-2	C50B8.2	C50B8.2,C50B8.2	3.1314	2.28179	2.54839	0.888836	N.A.	adult Ce,embryo Ce	The bir-2 gene encodes a protein with two BIR domains that may be involved in apoptosis.	179841	44	34	10	14.51	4.1	2.11e-05	0.000552	1.21	0.41	Y	N
738	gst-42	WBGene00001790	gst-42	D1053.1	D1053.1,D1053.1	7.29935	4.51488	3.31121	1.88868	intestine	N.A.	gst-42 is orthologous to the human gene GLUTATHIONE TRANSFERASE ZETA-1 (also known as MALEYLACETOACETATE ISOMERASE; GSTZ1; OMIM:603758), which when mutated is thought to lead to a variety of type I tyrosinemia.	183911	41	30	11	13.98	4.09	2.12e-05	0.000555	0.26	1.56	Y	Y
740	cyp-34A6	WBGene00015041	cyp-34A6	B0213.11	B0213.11a,B0213.11b,B0213.11c,B0213.11:wp106,B0213.11c,B0213.11b,B0213.11a	-0.863287	-0.077557	1.16414	0.628668	N.A.	N.A.	cyp-34A6 is an ortholog of human CYP21A2 (cytochrome P450 family 21 subfamily A member 2) and members of the CYP2 (Cytochrome P4502) family including CYP2E1; cyp-34A6 is predicted to have heme binding activity, iron ion binding activity, and oxidoreductase activity, acting on paired donors, with incorporation or reduction of molecular oxygen, based on protein domain information.	181848	33	25	8	12.49	4.09	2.15e-05	0.000561	1.22	0.45	Y	N
741	sth-1	WBGene00006060	sth-1	ZC513.12	ZC513.12,ZC513.12	-0.375766	4.34201	2.83291	-1.15905	germ line,spermatheca	adult Ce,L4 larva Ce	sth-1 is expressed in the spermatheca and the germ line; sth-1 is localized to the plasma membrane.	179188	9	8	1	6.41	4.09	2.16e-05	0.000563	0.15	2.68	N	N
743	mboa-2	WBGene00010408	mboa-2	H19N07.4	H19N07.4a,H19N07.4b,H19N07.4a:wp245,H19N07.4b.1,H19N07.4b.2,H19N07.4a.1,H19N07.4a.2	4.7252	2.42084	3.25006	3.24663	N.A.	N.A.	mboa-2 encodes a sterol O-acyltransferase orthologous to Drosophila MIDWAY, and to human DGAT1 (OMIM:604900); MBOA-2 has acyl-CoA:diacylglycerol O-acyltransferase activity when expressed in yeast; MBOA-2 has no obvious function in mass RNAi assays.	179540	38	30	8	13.42	4.09	2.19e-05	0.000568	0.61	0.36	Y	Y
744	F55A11.6	WBGene00010079	F55A11.6	F55A11.6	F55A11.6a,F55A11.6b,F55A11.6c,F55A11.6d,F55A11.6e,F55A11.6:wp99,F55A11.6a:wp175,F55A11.6b:wp175,F55A11.6c,F55A11.6d,F55A11.6a,F55A11.6b,F55A11.6e.1,F55A11.6e.2	5.80459	2.85374	4.93934	2.15273	N.A.	N.A.	F55A11.6 encodes a protein most similar to glutathione S-transferases; as loss of F55A11.6 activity via large-scale RNAi results in no obvious defects, the precise role of F55A11.6 in C. elegans development and/or behavior is not yet known.	179613	9	9	0	6.4	4.08	2.23e-05	0.000578	0.33	0.29	Y	N
745	F47G3.1	WBGene00018576	F47G3.1	F47G3.1	F47G3.1,F47G3.1	3.06093	-0.0488978	-2.32203	-0.222707	N.A.	N.A.	Microarray and RNA sequencing studies indicate that F47G3.1 is affected by cyc-1, lin-15B, pgrn-1, emr-1, lem-2, blmp-1, daf-2, glp-1, jmjd-3.1, jmjd-1.2, dpy-21, daf-12, daf-16, sir-2.1, crh-1, and let-60; microarray studies indicate that F47G3.1 is affected by Resveratrol, Atrazine, Cry5B, Chlorpyrifos, Diazinon, Quercetin, Allantoin, and Sirolimus; tiling array studies indicate that F47G3.1 is…	180543	35	29	6	12.83	4.08	2.28e-05	0.000589	0	1.01	N	N
746	clec-17	WBGene00008477	clec-17	E03H4.10	E03H4.10,E03H4.10	2.39297	1.12381	-4.28723	-0.924487	N.A.	N.A.	clec-17 is an ortholog of human CLEC3B (C-type lectin domain family 3 member B) and CLEC3A (C-type lectin domain family 3 member A); microarray and RNA sequencing studies indicate that clec-17 is affected by Heme, Hydrogen sulfide, Methylmercury hydroxide, 1-methylnicotinamide, Nicotinic acid, Sodium arsenite, D-glucose, Bisphenol A, Resveratrol, Atrazine, Cry5B, Chlorpyrifos, Diazinon, Quercetin…	173111	35	24	11	12.83	4.08	2.28e-05	0.000589	0.71	1	N	N
747	Y42H9AR.5	WBGene00021540	Y42H9AR.5	Y42H9AR.5	Y42H9AR.5,Y42H9AR.5	3.36203	1.26715	-0.616214	-0.182189	N.A.	N.A.	Microarray and RNA sequencing studies indicate that Y42H9AR.5 is affected by lin-35, tatn-1, hlh-30, wrn-1, daf-2, daf-12, daf-16, dpy-21, ain-1, and ain-2; microarray and RNA sequencing studies indicate that Y42H9AR.5 is affected by Methylmercuric chloride, Rotenone, and Atrazine; tiling array, RNA sequencing, and microarray studies indicate that Y42H9AR.5 is enriched in the germline precursor c…	259581	9	9	0	6.39	4.08	2.3e-05	0.000594	2.1	0.41	Y	N
748	T06E4.14	WBGene00077691	T06E4.14	T06E4.14	T06E4.14,T06E4.14	-4.00169	9.52707	-1.27975	3.77219	N.A.	N.A.	RNA sequencing and microarray studies indicate that T06E4.14 is affected by Ethanol, Methylmercury hydroxide, 1-methylnicotinamide, Rotenone, Manganese chloride, D-glucose, and Resveratrol; tiling array, RNA sequencing, and microarray studies indicate that T06E4.14 is enriched in the pharyngeal muscle cell and intestine.	6418768	24	20	4	10.55	4.07	2.33e-05	0.000599	0	0.43	N	N
749	Y43C5A.3	WBGene00012783	Y43C5A.3	Y43C5A.3	Y43C5A.3,Y43C5A.3	4.54477	1.28762	1.86279	0.779857	hyp7 syncytium,hypodermis,ventral cord blast cell	adult Ce,L2 larva Ce,L3 larva Ce,L4 larva Ce	Y43C5A.3 is involved in defense response to Gram-negative bacterium and killing of cells of other organism; Y43C5A.3 exhibits double-stranded DNA binding activity; Y43C5A.3 is expressed in the hypodermis and the ventral cord blast cell.	189848	45	30	15	14.58	4.07	2.4e-05	0.000618	0.36	0.28	Y	N
750	flp-10	WBGene00001453	flp-10	T06C10.4	T06C10.4,T06C10.4	6.19277	4.51864	7.3566	6.83132	AIML,AIMR,ASIL,ASIR,AUAL,AUAR,BAGL,BAGR,BDUL,BDUR,DVB,nerve ring,PQR,PVR,URXL,URXR,vulD	all stages Ce	flp-10 encodes a FMRFamide-related neuropeptide; in males, flp-10 activity is required for a sensory transduction pathway that negatively regulates the frequency of certain substeps of turning behavior during mating; a flp-10::gfp reporter is expressed in a number of neurons including AIM, ASI, AUA, BAG, BDU, DVB, PQR, PVR, and URX, and in the vulD cells.	177574	44	34	10	14.4	4.06	2.42e-05	0.000621	0	0.57	N	N
752	R08E5.3	WBGene00019963	R08E5.3	R08E5.3	R08E5.3,R08E5.3	6.24212	3.63686	2.91175	2.11691	intestine	adult Ce,L1 larva Ce,L2 larva Ce,L3 larva Ce,L4 larva Ce	R08E5.3 is expressed in the intestine.	178795	39	25	14	13.49	4.05	2.54e-05	0.000651	0.21	0	Y	N
753	W03G1.5	WBGene00021011	W03G1.5	W03G1.5	W03G1.5,W03G1.5	-1.70333	2.32248	0.442519	3.0272	N.A.	N.A.	W03G1.5 is involved in determination of adult lifespan.	189167	44	35	9	14.35	4.05	2.58e-05	0.00066	0.73	0.76	N	N
756	T19H5.4	WBGene00011849	T19H5.4	T19H5.4	T19H5.4a,T19H5.4b,T19H5.4b.1,T19H5.4b.2,T19H5.4a	7.29247	3.89168	4.7328	6.53102	N.A.	N.A.	Tiling array, microarray, and RNA sequencing studies indicate that T19H5.4 is affected by daf-16, sma-2, gld-2, ham-3, dpy-21, sir-2.1, ain-1, fbf-1, crh-1, tax-6, daf-2, xpa-1, and nuo-6; microarray studies indicate that T19H5.4 is affected by Diazinon, Paraquat, and Sirolimus; RNA sequencing studies indicate that T19H5.4 is enriched in the germ line and in the AFD neurons.	174503	45	38	7	14.51	4.04	2.62e-05	0.000668	0.29	0.61	Y	N
757	T14A8.2	WBGene00020497	T14A8.2	T14A8.2	T14A8.2a,T14A8.2b,T14A8.2c,T14A8.2:wp166,T14A8.2b,T14A8.2a,T14A8.2c	3.25016	4.42105	1.48655	1.42598	N.A.	N.A.	T14A8.2 is involved in striated muscle myosin thick filament assembly.	188490	42	29	13	14	4.04	2.62e-05	0.000667	1	0	Y	N
758	T04F8.7	WBGene00011445	T04F8.7	T04F8.7	T04F8.7a,T04F8.7b,T04F8.7:wp178,T04F8.7a,T04F8.7b	1.55894	4.02401	1.61278	-0.287341	N.A.	N.A.	Microarray and RNA sequencing studies indicate that T04F8.7 is affected by sma-2, hcf-1, nhr-114, wdr-23, eat-2, daf-2, npr-1, hsf-1, mir-60, chd-3, daf-16, skn-1, hlh-30, crh-1, tax-6, and ain-2; microarray and RNA sequencing studies indicate that T04F8.7 is affected by Tunicamycin, Cry5B, Quercetin, Hydrolyzable Tannins, Humic substances, Colistin, and Allantoin; tiling array and microarray stu…	188067	39	30	9	13.46	4.04	2.65e-05	0.000673	0.3	0.89	N	Y
759	nmr-1	WBGene00003774	nmr-1	F07F6.6	F07F6.6,F07F6.6.1,F07F6.6.2	-1.26161	-1.52967	-0.324665	3.33658	AVAL,AVAR,AVDL,AVDR,AVEL,AVER,AVG,gonadal sheath cell,oocyte,PVCL,PVCR,RIML,RIMR	N.A.	nmr-1 encodes an NMDA-type ionotropic glutamate receptor subunit that affects the duration of forward movement which is important during foraging behavior, and also affects osmotic avoidance; the slow kinetics typical of NMDA-dependent currents are likely important for its effect on forward movement.	173929	34	25	9	12.54	4.04	2.65e-05	0.000673	0.23	0.73	N	N
760	sek-6	WBGene00012162	sek-6	VZC374L.1	VZC374L.1,VZC374L.1	-2.22504	1.05899	-0.377052	-1.12469	N.A.	N.A.	sek-6 is an ortholog of human MAP2K4 (mitogen-activated protein kinase kinase 4); sek-6 is predicted to have ATP binding activity and protein kinase activity, based on protein domain information.	189074	21	21	0	9.78	4.04	2.66e-05	0.000675	1.21	2.64	N	Y
761	col-176	WBGene00000749	col-176	ZC373.7	ZC373.7,ZC373.7	0.923979	6.16322	0.602288	2.39828	N.A.	N.A.	col-176 is an ortholog of human SFTPD (surfactant protein D); col-176 is involved in body morphogenesis; col-176 is a structural constituent of cuticle, based on protein domain information.	181219	41	31	10	13.81	4.04	2.66e-05	0.000674	0	0.4	N	N
762	nhr-43	WBGene00003633	nhr-43	C29E6.5	C29E6.5a,C29E6.5b,C29E6.5b,C29E6.5a	5.26128	1.66997	-0.161298	1.55374	dorsal nerve cord,excretory cell,head neuron,hypodermis,intestine	adult Ce,fully-elongated embryo Ce,L1 larva Ce,L2 larva Ce,L3 larva Ce,L4 larva Ce	nhr-43 is predicted to encode a nuclear hormone receptor (NHR); the primary sequence of nhr-43 reveals that it has a leucine instead of a methionine that is conserved within the NHR superfamily at the carboxyl boundary of the DNA-binding domain.	178121	43	33	10	14.14	4.04	2.7e-05	0.000685	0.61	1.13	Y	N
763	dhs-15	WBGene00000978	dhs-15	R05D8.10	R05D8.10,R05D8.10	2.31777	0.0404963	-0.0277894	1.20696	N.A.	N.A.	dhs-15 encodes a member of the short chain dehydrogenase/reductase family.	178739	28	22	6	11.31	4.03	2.75e-05	0.000696	0.34	0.15	N	N
764	Y38F1A.8	WBGene00012610	Y38F1A.8	Y38F1A.8	Y38F1A.8,Y38F1A.8	2.93689	2.51027	-1.55301	0.141744	N.A.	N.A.	Y38F1A.8 is an ortholog of human PGAP2 (post-GPI attachment to proteins 2); microarray and RNA sequencing studies indicate that Y38F1A.8 is affected by lin-35, zfp-1, nhr-114, csr-1, daf-16, jmjd-3.1, jmjd-1.2, daf-2, sir-2.1, ain-2, dpy-9, fbf-1, mir-243, tax-6, octr-1, mir-35, and pmk-1; microarray studies indicate that Y38F1A.8 is affected by Progesterone, Cadmium, Chlorpyrifos, Diazinon, R24,…	189674	43	34	9	14.13	4.03	2.76e-05	0.000696	0.56	0	N	N
765	ugt-36	WBGene00017315	ugt-36	F09G2.6	F09G2.6,F09G2.6:wp142,F09G2.6	0.600092	-0.266773	-4.06002	-4.30165	N.A.	N.A.	ugt-36 is an ortholog of human UGT3A2 (UDP glycosyltransferase family 3 member A2) and UGT3A1 (UDP glycosyltransferase family 3 member A1); ugt-36 is predicted to have transferase activity, transferring hexosyl groups, based on protein domain information.	184266	41	37	4	13.77	4.03	2.8e-05	0.000707	0.69	1	Y	N
766	Y37A1B.17	WBGene00044989	Y37A1B.17	Y37A1B.17	Y37A1B.17a,Y37A1B.17b,Y37A1B.17c,Y37A1B.17d,Y37A1B.17a:wp191,Y37A1B.17b,Y37A1B.17d,Y37A1B.17c.1,Y37A1B.17c.2,Y37A1B.17a	5.40762	4.21077	5.10194	5.90164	N.A.	N.A.	Y37A1B.17 is an ortholog of human ARHGEF37 (Rho guanine nucleotide exchange factor 37), DNMBP (dynamin binding protein) and ARHGEF38 (Rho guanine nucleotide exchange factor 38); Y37A1B.17 is involved in locomotion; Y37A1B.17 is predicted to have Rho guanyl-nucleotide exchange factor activity, based on protein domain information.	4926960	37	29	8	13.05	4.03	2.82e-05	0.000711	0.99	0	Y	N
767	cdr-6	WBGene00010471	cdr-6	K01D12.12	K01D12.12,K01D12.12	5.24471	5.80214	5.28637	4.85402	intestine,pharynx,rectal gland cell	adult Ce,larva Ce	cdr-6 encodes a predicted transmembrane protein that is a member of the C. elegans CDR (cadmium responsive) family of proteins; loss of cdr-6 activity results in shortened lifespan, but has no effect on sensitivity to cadmium or other metals; cdr-6 is expressed postembryonically in pharyngeal and intestinal cells, as well as the rectal gland cell.	179703	44	34	10	14.27	4.02	2.87e-05	0.000721	0.19	0.42	Y	Y
768	T05H4.15	WBGene00020276	T05H4.15	T05H4.15	T05H4.15a,T05H4.15b,T05H4.15c,T05H4.15b,T05H4.15c,T05H4.15a	-0.54944	0.472657	-0.828354	0.910193	N.A.	N.A.	T05H4.15 is involved in embryo development.	179030	33	25	8	12.28	4.02	2.88e-05	0.000724	2	0.79	Y	Y
769	glb-23	WBGene00020045	glb-23	R13A1.8	R13A1.8,R13A1.8	-2.11596	1.34529	1.84077	4.72992	head neuron,lateral nerve cord,ventral cord neuron,ventral nerve cord	adult Ce,dauer larva Ce,embryo Ce,L1 larva Ce,L2 larva Ce,L3 larva Ce,L4 larva Ce	glb-23 encodes a globin; glb-23 transcription is higher in L3 and dauers than in young adults; glb-23 has no obvious function in mass RNAi assays.	187853	32	24	8	12.08	4.02	2.94e-05	0.000738	0.31	0.13	N	N
770	octr-1	WBGene00006411	octr-1	F14D12.6	F14D12.6a,F14D12.6b,F14D12.6:wp102,F14D12.6:wp108,F14D12.6a,F14D12.6b	-0.523668	0.500343	3.86417	4.62555	ADEL,ADER,AIYL,AIYR,ASHL,ASHR,ASIL,ASIR,body region,CEPDL,CEPDR,CEPVL,CEPVR,gonadal sheath cell,head neuron,intestine,nerve ring,nervous system,neuron,reproductive system,sensory neuron,spermatheca,tail,tail neuron,uterine muscle,uterine toroidal epithelial cell,ventral cord neuron	adult Ce,larva Ce	octr-1 encodes a predicted G-protein-coupled seven-transmembrane domain biogenic amine receptor; OCTR-1, along with SER-3, plays a role in antagonistically modulating aversive behavior mediated by ASH neuronal signalling, with OCTR-1 signalling mediated by GOA-1 (G (o); OCTR-1 also plays a role in regulating the innate immune response and the unfolded protein response; an OCTR-1::GFP fusion prote…	184469	45	35	10	14.4	4.01	2.98e-05	0.000746	0.15	0.23	N	N
771	col-125	WBGene00000699	col-125	C29F4.1	C29F4.1,C29F4.1	6.96843	10.0747	4.15275	4.5495	N.A.	N.A.	col-125 is an ortholog of human MARCO (macrophage receptor with collagenous structure); col-125 is involved in body morphogenesis, lipid storage, locomotion and nematode larval development; col-125 is a structural constituent of cuticle, based on protein domain information.	178029	34	29	5	12.43	4.01	3.07e-05	0.000767	0.34	0	N	N
772	ZK632.10	WBGene00014017	ZK632.10	ZK632.10	ZK632.10,ZK632.10.1,ZK632.10.2	5.41158	5.23941	7.45188	5.57887	N.A.	N.A.	Microarray, tiling array, and RNA sequencing studies indicate that ZK632.10 is affected by cgh-1, age-1, daf-16, daf-12, tatn-1, prg-1, jmjd-3.1, sir-2.1, ain-1, fbf-1, rnp-8, gld-1, daf-2, and hcf-1; RNA sequencing and microarray studies indicate that ZK632.10 is affected by Rotenone, Fluoranthene, Cry5B, and Sirolimus; RNA sequencing and microarray studies indicate that ZK632.10 is enriched in …	176395	46	34	12	14.54	4.01	3.07e-05	0.000767	1.86	0.23	Y	Y
773	cyp-14A1	WBGene00010705	cyp-14A1	K09A11.2	K09A11.2,K09A11.2	-1.3477	-2.07359	-2.67134	-4.43202	N.A.	N.A.	cyp-14A1 encodes one of ~80 C. elegans cytochrome P450s: membrane-associated, heme-containing NADPH-dependent monooxygenases that catalyze the oxidative metabolism of a variety of exogenous compounds and endogenous substrates.	187183	35	26	9	12.62	4.01	3.08e-05	0.000768	0.73	0.61	Y	N
774	C51E3.9	WBGene00008254	C51E3.9	C51E3.9	C51E3.9a,C51E3.9b,C51E3.9a,C51E3.9b	4.34295	5.85748	7.71679	4.06676	N.A.	N.A.	Microarray, RNA sequencing, and proteomic studies indicate that C51E3.9 is affected by clk-1, cyc-1, lin-39, daf-2, gld-1, let-7, emr-1, lem-2, bar-1, npr-1, let-418, chd-3, and ain-2; RNA sequencing and microarray studies indicate that C51E3.9 is affected by D-glucose and Chlorpyrifos; tiling array, RNA sequencing, and microarray studies indicate that C51E3.9 is enriched in the body wall muscle …	266923	9	9	0	6.28	4.01	3.09e-05	0.00077	0.61	0.29	Y	N
777	F41E6.5	WBGene00018286	F41E6.5	F41E6.5	F41E6.5a,F41E6.5b,F41E6.5:wp86,F41E6.5:wp188,F41E6.5a,F41E6.5b.1,F41E6.5b.2	4.64011	2.24178	0.59057	-0.256585	intestine,pharynx	adult Ce,larva Ce	F41E6.5 is an ortholog of human HAO2 (hydroxyacid oxidase 2) and HAO1 (hydroxyacid oxidase 1); F41E6.5 is predicted to have FMN binding activity and oxidoreductase activity, based on protein domain information; F41E6.5 is expressed in the pharynx and the intestine.	179241	38	31	7	13.14	4	3.18e-05	0.000789	0.12	2.4	Y	Y
778	Y77E11A.2	WBGene00022307	Y77E11A.2	Y77E11A.2	Y77E11A.2,Y77E11A.2:wp134,Y77E11A.2	6.33154	5.3977	4.64683	4.07863	N.A.	N.A.	Y77E11A.2 is an ortholog of human NADK2 (NAD kinase 2, mitochondrial); Y77E11A.2 is predicted to have NAD+ kinase activity, based on protein domain information.	176954	39	31	8	13.32	4	3.18e-05	0.000789	0.33	1.61	N	N
779	lgc-22	WBGene00017483	lgc-22	F15E6.2	F15E6.2a,F15E6.2b,F15E6.2:wp114,F15E6.2b,F15E6.2a	5.10416	4.24312	0.346118	0.597873	N.A.	N.A.	lgc-22 is an ortholog of human TYRP1 (tyrosinase related protein 1), DCT (dopachrome tautomerase) and TYR (tyrosinase); lgc-22 is predicted to have extracellular ligand-gated ion channel activity, based on protein domain information.	184533	39	25	14	13.31	3.99	3.24e-05	0.000802	1.19	1	N	N
781	W04G3.5	WBGene00012258	W04G3.5	W04G3.5	W04G3.5a,W04G3.5b,W04G3.5b,W04G3.5a.1,W04G3.5a.2	5.91766	4.23853	5.27486	4.86074	intestine,pharynx	adult Ce	W04G3.5 is an ortholog of human PRPSAP2 (phosphoribosyl pyrophosphate synthetase associated protein 2) and PRPSAP1 (phosphoribosyl pyrophosphate synthetase associated protein 1); W04G3.5 is predicted to have magnesium ion binding activity and ribose phosphate diphosphokinase activity, based on protein domain information; W04G3.5 is expressed in the pharynx and the intestine.	181299	32	26	6	11.99	3.99	3.36e-05	0.00083	0.15	2.36	Y	N
782	nhr-113	WBGene00003703	nhr-113	ZK1025.9	ZK1025.9,ZK1025.9	-3.58743	0.664527	-4.90169	-3.17075	seam cell	adult Ce,fully-elongated embryo Ce,L1 larva Ce,L2 larva Ce,L3 larva Ce,L4 larva Ce	nhr-113 encodes a nuclear receptor that is most highly conserved amongst nematode species.	173033	33	25	8	12.16	3.98	3.44e-05	0.000847	0.12	1.02	N	N
783	T04A6.1	WBGene00020200	T04A6.1	T04A6.1	T04A6.1a,T04A6.1b,T04A6.1:wp82,T04A6.1a,T04A6.1b	2.13504	2.65583	5.46335	2.34358	anal depressor muscle,anal sphincter muscle,body wall musculature,reproductive system,vulval muscle	adult Ce,L1 larva Ce,L2 larva Ce,L3 larva Ce,L4 larva Ce,larva Ce	T04A6.1 is expressed in the anal depressor muscle, reproductive system, anal sphincter muscle, and the body wall musculature.	188035	41	30	11	13.6	3.98	3.5e-05	0.000862	0.79	0.23	N	N
784	fbxa-6	WBGene00008352	fbxa-6	cTel54X.1	cTel54X.1,cTel54X.1	-0.642559	-6.09301	-3.9972	0.0244172	N.A.	N.A.	This gene encodes a protein containing an F-box, a motif predicted to mediate protein-protein interactions either with homologs of yeast Skp-1p or with other proteins; this gene's encoded protein also contains an FTH/DUF38 motif, which may also mediate protein-protein interaction.	183881	40	30	10	13.42	3.97	3.52e-05	0.000867	0.61	2.15	N	Y
785	W01C9.1	WBGene00012175	W01C9.1	W01C9.1	W01C9.1,W01C9.1:wp111,W01C9.1	-1.75347	-0.023693	2.27879	-2.23376	N.A.	N.A.	Microarray, tiling array, and RNA sequencing studies indicate that W01C9.1 is affected by cyc-1, rsr-2, clk-1, csr-1, pgl-1, pgl-3, glh-4, glh-1, daf-2, npr-1, jmjd-3.1, elli-1, daf-12, dpy-21, and sir-2.1; microarray and RNA sequencing studies indicate that W01C9.1 is affected by Hydrogen sulfide, Methylmercuric chloride, Rotenone, Resveratrol, Colistin, and Dafa#1; microarray and RNA sequencing…	189088	32	24	8	11.95	3.97	3.54e-05	0.00087	2.38	0.23	N	N
786	pifk-1	WBGene00018076	pifk-1	F35H12.4	F35H12.4,F35H12.4:wp150,F35H12.4	3.85873	2.29033	3.44109	2.80969	head,head neuron,intestine,nerve ring,nervous system,pharynx,reproductive system,seam cell,tail,vulva	adult Ce,larva Ce	pifk-1 is an ortholog of human PI4KB (phosphatidylinositol 4-kinase beta); pifk-1 is involved in endoplasmic reticulum unfolded protein response; pifk-1 is predicted to have kinase activity, based on protein domain information; pifk-1 is expressed in the pharynx, nervous system, head, tail, reproductive system, seam cell, and the intestine.	180443	42	33	9	13.75	3.97	3.57e-05	0.000876	0	0.43	Y	Y
787	pgp-4	WBGene00003998	pgp-4	F42E11.1	F42E11.1a,F42E11.1b,F42E11.1:wp208,F42E11.1a,F42E11.1b	-1.43058	2.25353	1.58208	1.68575	body wall musculature,excretory canal,excretory cell,head neuron,nerve ring,nervous system	adult Ce,larva Ce	pgp-4 encodes an ATP-binding protein that is a member of the P-glycoprotein subclass of the ATP-binding cassette (ABC) transporter superfamily; PGP-4 is predicted to function as a transmembrane protein that couples energy to transport of various molecules across membranes; RNAi experiments demonstrate that pgp-4 is required for efficient RNAi in the germline; pgp-4 promoter-gfp fusion proteins ar…	181327	33	27	6	12.13	3.97	3.6e-05	0.000881	0.34	1.04	N	N
788	F46A9.1	WBGene00009754	F46A9.1	F46A9.1	F46A9.1,F46A9.1	0.422121	2.83029	0.644179	-0.810786	N.A.	N.A.	RNA sequencing and microarray studies indicate that F46A9.1 is affected by Nicotinic acid, Rotenone, Manganese chloride, D-glucose, Atrazine, Humic substances, single-walled carbon nanotubes, Paraquat, Colistin, and Sirolimus; RNA sequencing studies indicate that F46A9.1 is enriched in the germ line and male.	172772	38	25	13	13.05	3.97	3.62e-05	0.000886	0.82	1.81	Y	N
789	W08E12.8	WBGene00021089	W08E12.8	W08E12.8	W08E12.8a,W08E12.8b,W08E12.8:wp175,W08E12.8a,W08E12.8b.1,W08E12.8b.2	0.986468	0.0460219	-1.96127	-0.866104	N.A.	N.A.	Microarray, tiling array, and RNA sequencing studies indicate that W08E12.8 is affected by clk-1, age-1, daf-12, tatn-1, emr-1, lem-2, ubc-9, htz-1, lin-35, daf-16, dpy-21, mir-243, crh-1, tax-6, daf-2, tbx-2, nhr-25, and oga-1; RNA sequencing and microarray studies indicate that W08E12.8 is affected by Nicotinic acid, D-glucose, Bisphenol S, Chlorpyrifos, Diazinon, single-walled carbon nanotubes…	189295	39	30	9	13.22	3.97	3.63e-05	0.000888	1	0.45	Y	N
790	Y80D3A.9	WBGene00013587	Y80D3A.9	Y80D3A.9	Y80D3A.9,Y80D3A.9	3.84601	2.66702	2.33719	1.29437	N.A.	N.A.	Y80D3A.9 is an ortholog of human Tango2 (transport and golgi organization 2); microarray, proteomic, and RNA sequencing studies indicate that Y80D3A.9 is affected by lin-35, age-1, gld-1, let-7, clk-1, wrn-1, skn-1, glp-1, mdt-15, hpk-1, elt-2, npr-1, cco-1, jmjd-3.1, jmjd-1.2, sir-2.1, ain-1, fbf-1, nhr-66, and spg-7; RNA sequencing and microarray studies indicate that Y80D3A.9 is affected by D-…	190742	35	28	7	12.49	3.96	3.67e-05	0.000897	0	0.97	Y	Y
791	F46F2.3	WBGene00009787	F46F2.3	F46F2.3	F46F2.3,F46F2.3	7.99816	6.37619	5.53813	3.04386	hypodermis	N.A.	F46F2.3 is involved in embryo development; F46F2.3 is expressed in the hypodermis.	181619	44	30	14	14.04	3.96	3.81e-05	0.000928	1.82	0	N	N
792	F41C3.8	WBGene00018274	F41C3.8	F41C3.8	F41C3.8a,F41C3.8b,F41C3.8:wp154,F41C3.8b,F41C3.8a	-0.112015	3.0298	1.84936	1.73751	I3 neuron,I6 neuron,intestine,neuron,pharyngeal muscle cell	adult Ce,embryo Ce,L1 larva Ce,L2 larva Ce,L3 larva Ce,L4 larva Ce	F41C3.8 is involved in defense response to Gram-negative bacterium and innate immune response; F41C3.8 is expressed in the pharyngeal muscle cell, nervous system, and the intestine.	173814	42	31	11	13.69	3.95	3.85e-05	0.000937	0.69	0.43	N	N
793	ldp-1	WBGene00017719	ldp-1	F22F7.1	F22F7.1a,F22F7.1b,F22F7.1b:wp249,F22F7.1a,F22F7.1b.1,F22F7.1b.2	5.67632	6.42073	4.72685	4.34861	body region,body wall musculature,head,head neuron,intestine,nerve ring,nervous system,neuron,pharynx,tail,tail neuron	adult Ce,larva Ce	ldp-1 is an ortholog of human SCCPDH (saccharopine dehydrogenase (putative)); ldp-1 is predicted to have oxidoreductase activity, based on protein domain information; ldp-1 is expressed in the nervous system, body region, and the body wall musculature.	178692	46	34	12	14.35	3.95	3.88e-05	0.000943	1.38	0.61	Y	Y
794	acl-4	WBGene00018657	acl-4	F49H12.6	F49H12.6a,F49H12.6b,F49H12.6b,F49H12.6a	5.41892	4.68601	4.96166	4.43043	anal depressor muscle,body wall musculature,hypodermis,intestine,pharynx,reproductive system,vulval muscle	adult Ce,larva Ce	acl-4 encodes a phosphate acyltransferase; ACL-4 is predicted to be a membrane protein that functions in phospholipid biosynthesis; acl-4 expression can be detected in the pharynx, intestine, hypodermis, muscle, and reproductive system.	180519	36	28	8	12.63	3.95	3.91e-05	0.000949	0.76	0	Y	N
796	dyf-17	WBGene00012673	dyf-17	Y39B6A.11	Y39B6A.11,Y39B6A.11	-0.900086	0.490466	-0.619299	1.97792	nervous system	adult Ce,embryo Ce,L1 larva Ce,L2 larva Ce,L3 larva Ce,L4 larva Ce	dyf-17 is expressed in the nervous system; dyf-17 is localized to the ciliary transition zone.	189733	36	27	9	12.6	3.94	4.07e-05	0.000986	0.53	0.29	N	N
797	Y39F10A.1	WBGene00021452	Y39F10A.1	Y39F10A.1	Y39F10A.1,Y39F10A.1	-0.590708	2.2303	4.2536	4.56574	N.A.	N.A.	Microarray, tiling array, proteomic, and RNA sequencing studies indicate that Y39F10A.1 is affected by cyc-1, rsr-2, gld-1, let-7, prg-1, jmjd-3.1, jmjd-1.2, tbx-2, ain-2, and nuo-6; RNA sequencing and microarray studies indicate that Y39F10A.1 is affected by Rotenone, Cadmium, Fluoranthene, Paraquat, and Sirolimus; tiling array, RNA sequencing, and microarray studies indicate that Y39F10A.1 is e…	173464	43	33	10	13.78	3.93	4.24e-05	0.00103	0.7	0.13	N	N
798	chpf-2	WBGene00019108	chpf-2	F59D6.7	F59D6.7a,F59D6.7:wp220,F59D6.7b,F59D6.7a	4.25425	0.0944611	-2.99991	-0.515897	excretory cell,hermaphrodite,male,ray	N.A.	chpf-2 is an ortholog of human CHP1 (calcineurin like EF-hand protein 1) and CHP2 (calcineurin like EF-hand protein 2); chpf-2 is predicted to have calcium ion binding activity, based on protein domain information; chpf-2 is expressed in the excretory cell, in the hermaphrodite, and in the male.	186617	44	32	12	13.94	3.93	4.27e-05	0.00103	0.67	1.33	Y	N
799	T20D4.11	WBGene00020617	T20D4.11	T20D4.11	T20D4.11,T20D4.11	-2.36398	3.15683	3.42048	-0.121044	N.A.	N.A.	RNA sequencing and microarray studies indicate that T20D4.11 is affected by D-glucose, Resveratrol, Acrylamide, Atrazine, Chlorpyrifos, Diazinon, Cry5B, Humic substances, Colistin, Ethosuximide, and Sirolimus; tiling array and RNA sequencing studies indicate that T20D4.11 is enriched in the body wall muscle cell and muscle cell and in the PVD and OLL neurons.	188647	35	24	11	12.36	3.92	4.36e-05	0.00105	0	0	N	N
800	amt-1	WBGene00000133	amt-1	C05E11.4	C05E11.4,C05E11.4	-2.22393	-1.50223	-6.46894	-2.42728	N.A.	N.A.	amt-1 encodes a transmembrane transporter that by homology, is predicted to transport ammonium ions across the plasma membrane; as loss of amt-1 activity via large-scale RNAi screens does not result in any obvious abnormalities, the precise role of AMT-1 in C. elegans development and/or behavior is not yet known.	180729	36	29	7	12.54	3.92	4.43e-05	0.00107	0.68	0.61	Y	N
801	ZK809.8	WBGene00014088	ZK809.8	ZK809.8	ZK809.8a,ZK809.8b,ZK809.8a,ZK809.8b	6.27344	5.99551	8.32585	5.45374	N.A.	N.A.	ZK809.8 is involved in positive regulation of growth.	178093	42	32	10	13.58	3.92	4.44e-05	0.00107	0.93	0.97	N	N
802	W02H5.8	WBGene00020962	W02H5.8	W02H5.8	W02H5.8,W02H5.8.1,W02H5.8.2	5.26716	2.2425	2.37308	1.42387	intestine	adult Ce,larva Ce	W02H5.8 is an ortholog of human TKFC (triokinase and FMN cyclase); W02H5.8 is predicted to have ATP binding activity and glycerone kinase activity, based on protein domain information; W02H5.8 is expressed in the intestine.	178730	36	28	8	12.53	3.92	4.45e-05	0.00107	0.36	1	N	N
803	clh-4	WBGene00000531	clh-4	T06F4.2	T06F4.2a,T06F4.2b,T06F4.2a:wp142,T06F4.2a,T06F4.2b	-0.468227	0.924927	-3.82037	-3.20548	excretory cell	adult Ce,L1 larva Ce,L2 larva Ce,L3 larva Ce,L4 larva Ce	clh-4 is an ortholog of members of the human CLCN (Chloride voltage-gated channels) family including CLCN2; clh-4 is predicted to have catalytic activity and voltage-gated chloride channel activity, based on protein domain information; clh-4 is expressed in the excretory cell.	180687	42	33	9	13.58	3.92	4.46e-05	0.00107	0.41	0.48	N	N
804	msp-65	WBGene00003458	msp-65	ZK354.1	ZK354.1,ZK354.1	3.28196	4.21503	4.4974	-1.73853	hermaphrodite gonad,male gonad,oocyte,sperm,spermatheca,uterus	N.A.	msp-65 encodes a protein that belongs to a family of proteins called the Major Sperm Proteins (MSPs) that is conserved in nematodes; this family consists of closely related, small, basic proteins that make up 15% of sperm protein; this multigene family consists of over fifty genes, including many pseudogenes; MSPs are involved in both extracellular signaling and cytoskeletal functions during repr…	177311	43	32	11	13.74	3.92	4.46e-05	0.00107	0.61	0.58	N	N
805	ptr-8	WBGene00004222	ptr-8	F44F4.4	F44F4.4,F44F4.4	4.03639	2.34693	0.583696	0.536626	hypodermis,rectum	adult Ce,L1 larva Ce,L2 larva Ce,L3 larva Ce,L4 larva Ce	ptr-8 encodes a nematode-specific member of the sterol sensing domain (SSD) proteins, distantly paralogous to Drosophila PATCHED (PTC) and human PTCH (OMIM:601309, mutated in basal cell nevus syndrome); PTR-8 is weakly required for normal molting from L4 to adult stages; PTR-8 is also required for normal growth to full size and locomotion; PTR-8 is expressed in hypodermis.	174678	46	34	12	14.23	3.92	4.48e-05	0.00107	0	0.27	N	N
806	C04E6.13	WBGene00015427	C04E6.13	C04E6.13	C04E6.13,C04E6.13	1.08269	4.6854	4.22864	8.62642	N.A.	N.A.	RNA sequencing, microarray, and tiling array studies indicate that C04E6.13 is affected by wdr-23, clk-1, tdp-1, and elli-1; RNA sequencing studies indicate that C04E6.13 is affected by Rotenone; tiling array and RNA sequencing studies indicate that C04E6.13 is enriched in neurons including the DA, VA, BAG, dopaminergic, PVD, and OLL neurons.	353442	7	7	0	5.41	3.91	4.52e-05	0.00108	0.44	0.17	N	N
807	nas-15	WBGene00003534	nas-15	T04G9.2	T04G9.2,T04G9.2:wp142,T04G9.2	-4.27321	6.18568	-1.7616	0.962374	marginal cell,pm3,pm4,pm5,pm6	N.A.	nas-15 encodes an astacin-like metalloprotease.	180426	33	27	6	11.96	3.91	4.57e-05	0.00109	0.91	0	N	N
808	nlp-17	WBGene00003755	nlp-17	Y45F10A.5	Y45F10A.5,Y45F10A.5	2.62509	6.23867	0.60704	7.78678	N.A.	N.A.	nlp-17 is involved in body morphogenesis.	178319	43	29	14	13.72	3.91	4.6e-05	0.0011	0.12	0.13	N	N
809	Y95B8A.2	WBGene00022383	Y95B8A.2	Y95B8A.2	Y95B8A.2,Y95B8A.2	2.78932	4.56897	-0.83043	1.81282	N.A.	N.A.	RNA sequencing and microarray studies indicate that Y95B8A.2 is affected by 1-methylnicotinamide, Rotenone, D-glucose, Neurotoxins, Atrazine, Diazinon, Colistin, Dafa#1, and adsorbable organic bromine compounds; tiling array and RNA sequencing studies indicate that Y95B8A.2 is enriched in the hypodermis, Z4, and Z1.	171676	37	26	11	12.69	3.91	4.6e-05	0.0011	0.21	0	Y	N
811	T22F3.3	WBGene00020696	T22F3.3	T22F3.3	T22F3.3a,T22F3.3b,T22F3.3c,T22F3.3d,T22F3.3a,T22F3.3b,T22F3.3c,T22F3.3d	8.55752	7.25568	8.86684	8.09316	germ line	adult Ce	T22F3.3 is orthologous to the human glycogen phosphorylase isozymes found in the muscle (PYGM), liver (PYGL) and brain (PYGB); T22F3.3 is down-regulated in efl-1/E2F transcription factor and dpl-1/DP (E2F-heterodimerization partner) mutants and has putative E2F consensus sites.	178777	40	30	10	13.19	3.9	4.72e-05	0.00112	1.37	1.29	N	N
812	R09B5.11	WBGene00019979	R09B5.11	R09B5.11	R09B5.11,R09B5.11.1,R09B5.11.2	4.64516	2.12168	0.682215	-0.0371834	seam cell	embryo Ce,L1 larva Ce,L2 larva Ce	R09B5.11 is an ortholog of members of the human SLC (Solute carriers) family including SLC2A14; R09B5.11 is predicted to have substrate-specific transmembrane transporter activity, based on protein domain information; R09B5.11 is expressed in the seam cell.	178634	43	36	7	13.7	3.9	4.72e-05	0.00112	0.5	2.15	N	N
813	clec-145	WBGene00013013	clec-145	Y48E1B.16	Y48E1B.16,Y48E1B.16	-3.69494	0.0874405	3.99404	1.50168	N.A.	N.A.	Microarray and RNA sequencing studies indicate that clec-145 is affected by spe-44, set-2, htz-1, daf-2, glp-1, sir-2.1, dcr-1, alg-1, hcf-1, and eat-2; microarray and RNA sequencing studies indicate that clec-145 is affected by Methylmercuric chloride, Rotenone, Resveratrol, Cry5B, Quercetin, Humic substances, single-walled carbon nanotubes, and Selenium; tiling array studies indicate that clec-…	175003	44	30	14	13.86	3.9	4.72e-05	0.00112	0.46	0.41	N	N
816	F52H3.5	WBGene00009947	F52H3.5	F52H3.5	F52H3.5,F52H3.5	5.32504	4.19456	1.10032	-0.654545	hypodermis,intestine,Pharyngeal gland cell,pharynx	adult Ce,larva Ce	F52H3.5 is an ortholog of human TTC36 (tetratricopeptide repeat domain 36); F52H3.5 is expressed in the pharynx, hypodermis, and the intestine.	174562	45	34	11	14	3.9	4.88e-05	0.00115	0.57	0.57	N	N
817	abf-1	WBGene00000012	abf-1	C50F2.9	C50F2.9,C50F2.9	1.74671	0.850057	2.5066	-0.00660448	amphid neuron,body wall musculature,head neuron,intestine,pharyngeal lumen,pharynx	adult Ce,embryo Ce,L1 larva Ce,L2 larva Ce,L3 larva Ce,L4 larva Ce	The abf-1 gene encodes a homolog of the antibacterial factor ASABF from Ascaris suum; it is closely related to abf-2.	266827	22	19	3	9.66	3.89	4.93e-05	0.00116	1	0.13	N	N
818	cyp-34A4	WBGene00020386	cyp-34A4	T09H2.1	T09H2.1,T09H2.1	0.241085	0.340968	-0.318411	-0.728911	N.A.	N.A.	cyp-34A4 is an ortholog of human CYP21A2 (cytochrome P450 family 21 subfamily A member 2) and members of the CYP2 (Cytochrome P4502) family including CYP2E1; cyp-34A4 is predicted to have heme binding activity, iron ion binding activity, and oxidoreductase activity, acting on paired donors, with incorporation or reduction of molecular oxygen, based on protein domain information.	188350	43	30	13	13.66	3.89	4.94e-05	0.00117	0.49	2.74	N	N
819	tom-1	WBGene00006594	tom-1	M01A10.2	M01A10.2a,M01A10.2b,M01A10.2e,M01A10.2f,M01A10.2g,M01A10.2h,M01A10.2i,M01A10.2a:wp102,M01A10.2a:wp160,M01A10.2b:wp183,M01A10.2c:wp102,M01A10.2c:wp246,M01A10.2d:wp246,M01A10.2e,M01A10.2a,M01A10.2h,M01A10.2i,M01A10.2g,M01A10.2f,M01A10.2b	3.98298	3.76274	3.92257	6.82234	head neuron,tail neuron,ventral cord neuron	N.A.	tom-1 encodes a tomosyn ortholog that inhibits synaptic vesicle priming; TOM-1 is orthologous to human tomosyn-1 and tomosyn-2, and to Drosophila lethal(2)giant larvae; TOM-1 protein binds RIC-4 (SNAP-25) and UNC-64 (syntaxin) in vitro; tom-1 has two hypomorphic mutant alleles, tom-1(nu468) and tom-1(ok285), which confer aldicarb hypersensitivity, probably from excess cholinergic neurotransmissio…	172209	43	31	12	13.64	3.89	5.07e-05	0.00119	1.12	0.45	Y	N
820	Y4C6B.3	WBGene00021157	Y4C6B.3	Y4C6B.3	Y4C6B.3a,Y4C6B.3b,Y4C6B.3c,Y4C6B.3:wp240,Y4C6B.3a,Y4C6B.3b,Y4C6B.3c	2.71837	-0.604436	0.0126676	-2.22715	N.A.	N.A.	Y4C6B.3 is an ortholog of members of the human SLC (Solute carriers) family including SLC17A1; RNA sequencing and microarray studies indicate that Y4C6B.3 is affected by D-glucose, Humic substances, and Copper sulfate; tiling array and RNA sequencing studies indicate that Y4C6B.3 is enriched in the germline precursor cell and male and in the dopaminergic neurons.	177313	37	27	10	12.6	3.88	5.15e-05	0.00121	0.36	1.95	N	N
821	F25E2.3	WBGene00017781	F25E2.3	F25E2.3	F25E2.3,F25E2.3:wp108,F25E2.3	3.56389	2.65974	2.86598	0.110435	N.A.	N.A.	F25E2.3 is an ortholog of human ACOT8 (acyl-CoA thioesterase 8); F25E2.3 is predicted to have acyl-CoA hydrolase activity, based on protein domain information.	180429	44	29	15	13.79	3.88	5.16e-05	0.00121	0.33	0.23	N	Y
822	cnc-10	WBGene00012152	cnc-10	VK10D6R.1	VK10D6R.1,VK10D6R.1	3.39689	4.82792	3.66262	4.42508	N.A.	N.A.	cnc-10 encodes one of eleven C. elegans caenacin peptides.	3565147	9	9	0	6.09	3.88	5.17e-05	0.00121	1.07	0.49	Y	N
823	pgp-10	WBGene00004004	pgp-10	C54D1.1	C54D1.1,C54D1.1:wp173,C54D1.1	1.3823	0.408322	-2.45901	-1.19254	hypodermis,intestine	adult Ce,larva Ce	pgp-10 encodes an ATP-binding protein that is a member of the P-glycoprotein subclass of the ATP-binding cassette (ABC) transporter superfamily; PGP-10 is predicted to function as a transmembrane protein that couples energy to transport of various molecules across membranes, but as loss of pgp-10 activity via RNAi results in no obvious defects, the exact role of pgp-10 in C. elegans development a…	180981	29	24	5	11.1	3.88	5.18e-05	0.00122	0.29	2.23	N	N
824	slc-36.3	WBGene00012629	slc-36.3	Y38H6C.17	Y38H6C.17,Y38H6C.17:wp154,Y38H6C.17	-3.70859	0.60897	0.649183	0.775935	N.A.	N.A.	Y38H6C.17 encodes a putative amino acid transporter orthologous to human SLC36A1; Y38H6C.17 inhibits CEP-1- and HUS-1-dependent germline apoptosis, as do BMK-1, RAD-50, and RAD-51; Y38H6C.17 has 11 predicted transmembrane alpha-helices; Y38H6C.17 has multiple C. elegans paralogs and additional non-nematode orthologs, including budding yeast AVT3 and AVT4.	189698	40	29	11	13.11	3.88	5.22e-05	0.00122	1	0.23	N	N
825	ZC190.5	WBGene00022539	ZC190.5	ZC190.5	ZC190.5,ZC190.5:wp220,ZC190.5	-4.34194	-3.71423	1.20379	-3.21355	N.A.	N.A.	Tiling array, RNA sequencing, and microarray studies indicate that ZC190.5 is affected by daf-12, emr-1, lem-2, clk-1, hsf-1, let-418, and chd-3.	191095	37	32	5	12.59	3.88	5.22e-05	0.00122	0.41	0.64	N	N
827	C54D1.7	WBGene00016914	C54D1.7	C54D1.7	C54D1.7,C54D1.7	3.22536	1.186	-1.41889	-3.41837	N.A.	N.A.	Microarray, tiling array, and RNA sequencing studies indicate that C54D1.7 is affected by cyc-1, hpl-2, emr-1, lem-2, clk-1, tdp-1, daf-2, dpy-21, unc-39, daf-12, daf-16, and ain-2; tiling array studies indicate that C54D1.7 is enriched in the hypodermis.	259713	9	8	1	6.09	3.88	5.28e-05	0.00123	0.87	1.17	Y	N
828	lbp-1	WBGene00002253	lbp-1	F40F4.3	F40F4.3,F40F4.3.1,F40F4.3.2	7.79716	5.49343	9.34463	7.28475	hmc,hypodermis,intestine,rectal gland cell,reproductive system,vulval muscle	adult Ce,larva Ce	lbp-1 encodes a predicted secreted fatty acid binding protein (FABP) that is similar to the Ascaris suum secreted FABP As-p18; by homology, LBP-1 is predicted to function in sequestering or transporting small hydrophobic molecules such as lipids and steroid hormones; an lbp-1::gfp promoter fusion is expressed in the embryo, beginning at gastrulation, in presumptive hypodermal precursors; lbp-1::g…	180616	36	27	9	12.4	3.88	5.3e-05	0.00123	1	0.75	N	N
829	Y76A2B.5	WBGene00013577	Y76A2B.5	Y76A2B.5	Y76A2B.5,Y76A2B.5.1,Y76A2B.5.2	7.66987	6.3616	7.59349	7.04522	body wall musculature,gonad,vulva	adult Ce,embryo Ce,L1 larva Ce,L2 larva Ce,L3 larva Ce,L4 larva Ce	Y76A2B.5 is an ortholog of human MMADHC (methylmalonic aciduria and homocystinuria, cblD type); Y76A2B.5 is involved in cellular response to DNA damage stimulus; Y76A2B.5 is expressed in the body wall musculature.	176786	45	38	7	13.93	3.88	5.31e-05	0.00124	0	1.12	N	N
830	C41G7.9	WBGene00077771	C41G7.9	C41G7.9	C41G7.9a,C41G7.9b,C41G7.9b,C41G7.9a.1,C41G7.9a.2	6.23617	5.86359	6.47851	6.49862	N.A.	N.A.	C41G7.9 is an ortholog of human TSPO (translocator protein) and TSPO2 (translocator protein 2); microarray, RNA sequencing, and proteomic studies indicate that C41G7.9 is affected by atfs-1, spg-7, emr-1, lem-2, clk-1, daf-16, dep-1, daf-12, dpy-21, fbf-1, daf-2, hcf-1, sir-2.1, tdp-1, isp-1, and nuo-6; RNA sequencing and microarray studies indicate that C41G7.9 is affected by Rotenone, Atrazine,…	7040157	22	22	0	9.61	3.88	5.31e-05	0.00123	1.41	0.51	Y	N
831	K06H6.1	WBGene00019449	K06H6.1	K06H6.1	K06H6.1,K06H6.1	-5.33788	2.58809	-4.6229	-3.40376	seam cell	N.A.	K06H6.1 is expressed in the seam cell.	187070	33	27	6	11.85	3.87	5.35e-05	0.00124	0.45	0	N	N
832	F49E8.6	WBGene00018637	F49E8.6	F49E8.6	F49E8.6,F49E8.6	4.97665	2.91869	3.83876	5.69428	N.A.	N.A.	Tiling array, RNA sequencing, and microarray studies indicate that F49E8.6 is affected by daf-12, jmjd-3.1, sir-2.1, and nuo-6; microarray and RNA sequencing studies indicate that F49E8.6 is affected by Aldicarb, Rotenone, Mianserin, Cadmium, and Paraquat; microarray and RNA sequencing studies indicate that F49E8.6 is enriched in the germ line and in neurons including the PVD, OLL, NSM, and ASER …	177531	46	35	11	14.08	3.87	5.37e-05	0.00124	0.61	0	Y	N
833	F40F8.12	WBGene00044917	F40F8.12	F40F8.12	F40F8.12,F40F8.12	-1.01164	-0.932555	-1.83385	0.614056	N.A.	N.A.	Microarray studies indicate that F40F8.12 is affected by sma-2, sma-4, bar-1, clk-1, sir-2.1, daf-2, alg-1, and nuo-6; RNA sequencing and microarray studies indicate that F40F8.12 is affected by Mianserin and Colistin; RNA sequencing and microarray studies indicate that F40F8.12 is enriched in the germ line, HOB, CEM, male, and intestine and in the IL2 and ray type B neurons.	4927044	40	28	12	13.09	3.87	5.38e-05	0.00124	0	0	N	N
834	F28C1.3	WBGene00009201	F28C1.3	F28C1.3	F28C1.3a,F28C1.3b,F28C1.3c,F28C1.3d,F28C1.3:wp20,F28C1.3:wp87,F28C1.3d,F28C1.3a,F28C1.3c,F28C1.3b	4.7741	3.15444	4.33785	5.79515	N.A.	N.A.	F28C1.3 is an ortholog of human PPP1R37 (protein phosphatase 1 regulatory subunit 37); microarray, tiling array, and RNA sequencing studies indicate that F28C1.3 is affected by cyc-1, daf-16, daf-12, csr-1, npr-1, cco-1, jmjd-3.1, jmjd-1.2, hsf-1, dpy-21, sir-2.1, ain-1, ain-2, slr-2, alg-1, fbf-1, mir-35, and nuo-6; RNA sequencing and microarray studies indicate that F28C1.3 is affected by Roten…	179708	43	36	7	13.59	3.87	5.4e-05	0.00125	0.26	0.36	Y	N
836	C31H5.7	WBGene00007858	C31H5.7	C31H5.7	C31H5.7,C31H5.7	-0.73186	-1.88341	-1.46965	-0.856561	N.A.	N.A.	Tiling array and microarray studies indicate that C31H5.7 is affected by daf-16, nhr-114, ubc-9, clk-1, daf-2, and sir-2.1; microarray studies indicate that C31H5.7 is affected by Colistin; tiling array, RNA sequencing, and microarray studies indicate that C31H5.7 is enriched in the intestine, gon_male_dtc posterior, gon_male_dtc anterior, Z1.p, Z4.a, Z4, Z1, and male and in the dopaminergic neur…	3565903	22	17	5	9.6	3.87	5.47e-05	0.00126	1.38	0.36	Y	N
837	T07D10.3	WBGene00011583	T07D10.3	T07D10.3	T07D10.3,T07D10.3:wp101,T07D10.3	3.97574	-0.326261	-1.45241	-0.920193	seam cell	adult Ce,embryo Ce,L1 larva Ce,L2 larva Ce,L3 larva Ce,L4 larva Ce	T07D10.3 is expressed in the seam cell.	188228	46	31	15	14.05	3.86	5.56e-05	0.00128	0.53	2.92	N	N
838	D2030.2	WBGene00008412	D2030.2	D2030.2	D2030.2a,D2030.2b,D2030.2a.1,D2030.2a.2,D2030.2a.3,D2030.2b.1,D2030.2b.2,D2030.2b.3,D2030.2b.4	5.36825	4.08874	4.708	3.77308	intestine,rectal gland cell	adult Ce,larva Ce	D2030.2 is an ortholog of human CLPX (caseinolytic mitochondrial matrix peptidase chaperone subunit); D2030.2 is involved in nematode larval development and striated muscle myosin thick filament assembly; D2030.2 is predicted to have ATP binding activity, based on protein domain information; D2030.2 is expressed in the intestine and the rectal gland cell.	172511	37	28	9	12.53	3.86	5.67e-05	0.0013	1.21	0.23	Y	Y
839	K08E4.2	WBGene00010666	K08E4.2	K08E4.2	K08E4.2a,K08E4.2b,K08E4.2b,K08E4.2a	0.192656	2.32201	1.64311	2.62568	N.A.	N.A.	K08E4.2 is an ortholog of human CPTP (ceramide-1-phosphate transfer protein), GLTPD2 (glycolipid transfer protein domain containing 2) and GLTP (glycolipid transfer protein) and members of the PLEKH (Pleckstrin homology domain containing) family including PLEKHA3; K08E4.2 is predicted to have glycolipid binding activity and glycolipid transporter activity, based on protein domain information.	178144	46	33	13	14.03	3.86	5.68e-05	0.00131	1.48	0.13	Y	N
840	F39B2.3	WBGene00009554	F39B2.3	F39B2.3	F39B2.3,F39B2.3	4.7906	3.48776	3.91579	3.19866	N.A.	N.A.	F39B2.3 encodes an NADH quinone oxidoreductase.	173346	45	31	14	13.87	3.86	5.7e-05	0.00131	0.71	2.02	Y	N
841	C05D12.2	WBGene00007340	C05D12.2	C05D12.2	C05D12.2,C05D12.2:wp90,C05D12.2	0.421932	1.09726	0.455714	1.88108	N.A.	N.A.	C05D12.2 is an ortholog of human GNPTAB (N-acetylglucosamine-1-phosphate transferase alpha and beta subunits); microarray and RNA sequencing studies indicate that C05D12.2 is affected by clk-1, daf-2, glp-1, daf-16, jmjd-1.2, hsf-1, dpy-21, sir-2.1, dpy-10, osm-7, osm-11, and pmk-1; RNA sequencing and microarray studies indicate that C05D12.2 is affected by Rotenone, Quercetin, and Sirolimus.	174741	39	28	11	12.86	3.85	5.79e-05	0.00133	0.95	0.12	N	N
842	R02F11.3	WBGene00019841	R02F11.3	R02F11.3	R02F11.3a,R02F11.3b,R02F11.3:wp125,R02F11.3:wp131,R02F11.3a,R02F11.3b	5.08789	3.39434	4.43974	4.68599	N.A.	N.A.	R02F11.3 is predicted to have cation transmembrane transporter activity, based on protein domain information.	178869	43	32	11	13.52	3.85	5.82e-05	0.00133	0	0.29	N	N
843	gap-2	WBGene00001516	gap-2	ZK899.8	ZK899.8a,ZK899.8b,ZK899.8c,ZK899.8d,ZK899.8e,ZK899.8f,ZK899.8g,ZK899.8h,ZK899.8i,ZK899.8j,ZK899.8k,ZK899.8l,ZK899.8g:wp52,ZK899.8k,ZK899.8a,ZK899.8b,ZK899.8c,ZK899.8d,ZK899.8e,ZK899.8h,ZK899.8f,ZK899.8l,ZK899.8i.1,ZK899.8i.2,ZK899.8g,ZK899.8j	4.13231	4.14609	3.64224	4.04206	gonad,head muscle,head neuron,pharyngeal muscle cell,pharynx,pm6,seam cell,tail,uterine muscle,vulva,vulval muscle	postembryonic Ce	gap-2 encodes a Ras GTPase-activating protein (RasGAP) that is orthologous to mammalian nGAP and synGAP (OMIM:606136, OMIM:603384, synGAP is essential for postnatal survival and neuronal development); by homology, GAP-2 is predicted to function as a negative regulator of Ras signaling by enhancing the intrinsically weak Ras GTPase activity; gap-2 loss-of-function mutations partially suppress the …	181172	44	34	10	13.69	3.85	5.82e-05	0.00133	0.87	2.06	N	N
844	clec-8	WBGene00012582	clec-8	Y38E10A.4	Y38E10A.4,Y38E10A.4:wp143,Y38E10A.4	-2.71085	-1.55995	-5.08466	-3.45742	N.A.	N.A.	clec-8 is an ortholog of human CLEC3B (C-type lectin domain family 3 member B) and CLEC3A (C-type lectin domain family 3 member A); RNA sequencing and microarray studies indicate that clec-8 is affected by daf-2, hpk-1, npr-1, hsf-1, skn-1, dpy-21, daf-16, eri-1, mut-2, rrf-3, alg-1, tdp-1, and nuo-6; microarray studies indicate that clec-8 is affected by Tunicamycin, Cry5B, Humic substances, Dib…	174893	33	28	5	11.78	3.85	5.9e-05	0.00135	0.29	3.74	Y	Y
845	ins-23	WBGene00002106	ins-23	M04D8.3	M04D8.3,M04D8.3	1.7903	0.17722	6.3891	3.71564	amphid neuron,gonadal sheath cell,head neuron,inner labial neuron,intestinal muscle,nerve ring,outer labial neuron,pharynx,sensory neuron,ventral nerve cord	adult Ce,fully-elongated embryo Ce,L1 larva Ce,L2 larva Ce,L3 larva Ce,L4 larva Ce	ins-23 encodes an insulin-like peptide of the insulin superfamily of proteins (OMIM:176730, 147440); INS-23 is one of 38 insulin-like peptides in C. elegans, and is expressed in amphid sensory neurons, labial neurons, the nerve ring, and ventral nerve cord neurons; as loss of INS-23 function via RNA-mediated interference does not results in any abnormalities, the precise role of INS-23 in C. eleg…	191691	37	29	8	12.47	3.84	6.12e-05	0.0014	0.11	0.65	N	N
846	T24C2.5	WBGene00011984	T24C2.5	T24C2.5	T24C2.5,T24C2.5	4.77606	1.77347	-1.78388	1.54155	N.A.	N.A.	RNA sequencing and microarray studies indicate that T24C2.5 is affected by Rotenone, D-glucopyranose, Humic substances, and Sirolimus; tiling array, RNA sequencing, and microarray studies indicate that T24C2.5 is enriched in the intestine and in the dopaminergic neurons.	188842	30	23	7	11.18	3.84	6.16e-05	0.0014	0.3	3.23	N	Y
847	F15A8.6	WBGene00017478	F15A8.6	F15A8.6	F15A8.6a,F15A8.6b,F15A8.6:wp86,F15A8.6a,F15A8.6b	1.2715	3.88894	3.57137	5.28116	N.A.	N.A.	F15A8.6 is involved in lipid storage.	180715	43	30	13	13.48	3.84	6.16e-05	0.0014	0.29	0	N	N
848	Y46G5A.20	WBGene00012910	Y46G5A.20	Y46G5A.20	Y46G5A.20,Y46G5A.20	2.41745	2.85562	-2.52313	-0.550318	N.A.	N.A.	Microarray and RNA sequencing studies indicate that Y46G5A.20 is affected by Hydrogen sulfide, 1-methylnicotinamide, Cry5B, Quercetin, Humic substances, single-walled carbon nanotubes, Colistin, and Dafa#1; tiling array and microarray studies indicate that Y46G5A.20 is enriched in the intestine and muscle cell and in neurons including dopaminergic, PVD, OLL, I5, DA, SAB, and retrovesicular gangli…	174915	22	16	6	9.52	3.84	6.21e-05	0.00141	0.83	0.23	Y	Y
849	sbt-1	WBGene00011392	sbt-1	T03D8.3	T03D8.3,T03D8.3	7.64332	6.85733	7.29092	11.4285	neuron,pharynx	N.A.	sbt-1 encodes the C. elegans ortholog of the neuroendocrine chaperone 7B2; by homology, SBT-1 is predicted to function in the maturation/activation of the EGL-3/PC2 proprotein convertase; accordingly, mass spectrometry analysis indicates that sbt-1 activity is required for production of some neuropeptides; sbt-1 mutant animals are also aldicarb resistant, suggesting that SBT-1 is required for nor…	180366	45	34	11	13.78	3.83	6.31e-05	0.00143	1.14	1.27	N	Y
850	lys-2	WBGene00003091	lys-2	Y22F5A.5	Y22F5A.5,Y22F5A.5	2.64877	6.0438	-1.70406	-1.11568	N.A.	N.A.	lys-2 is one of ten C. elegans lysozyme genes; as such, lys-2 can be predicted to have a role in lysozymal function including immune function.	179429	40	30	10	12.96	3.83	6.32e-05	0.00144	1.41	1.59	N	Y
851	pab-2	WBGene00003903	pab-2	F18H3.3	F18H3.3a,F18H3.3b,F18H3.3b:wp229,F18H3.3b,F18H3.3a.1,F18H3.3a.2,F18H3.3a.3,F18H3.3a.4	8.02469	6.49391	7.58384	8.04601	N.A.	N.A.	pab-2 encodes a polyadenylate-binding protein 1 homolog with high similarity to human PABP 1.	181473	42	28	14	13.28	3.83	6.44e-05	0.00146	0.79	1.38	N	Y
852	nfki-1	WBGene00007877	nfki-1	C33A11.1	C33A11.1,C33A11.1.1,C33A11.1.2	5.73474	4.61809	5.64831	8.04652	N.A.	N.A.	nfki-1 is an ortholog of human PPP1R13L (protein phosphatase 1 regulatory subunit 13 like); nfki-1 is predicted to have transcription factor binding activity, based on protein domain information.	181625	39	30	9	12.77	3.83	6.46e-05	0.00146	0.29	0.23	N	N
853	T23F11.6	WBGene00011957	T23F11.6	T23F11.6	T23F11.6,T23F11.6:wp179,T23F11.6	-0.128216	3.50016	1.08128	-1.64811	N.A.	N.A.	T23F11.6 is an ortholog of human FAM46B (family with sequence similarity 46 member B), FAM46C (family with sequence similarity 46 member C), FAM46D (family with sequence similarity 46 member D) and FAM46A (family with sequence similarity 46 member A); tiling array, microarray, and RNA sequencing studies indicate that T23F11.6 is affected by daf-16, sma-2, daf-12, nhr-8, ubc-9, daf-2, npr-1, let-4…	3565839	9	8	1	6	3.82	6.55e-05	0.00148	0.15	0.75	Y	Y
854	Y105C5A.24	WBGene00013643	Y105C5A.24	Y105C5A.24	Y105C5A.24,Y105C5A.24:wp114,Y105C5A.24	0.639514	1.47657	-3.20548	-3.01972	N.A.	N.A.	Y105C5A.24 is an ortholog of human mos (v-mos Moloney murine sarcoma viral oncogene) and MAP3K7 (mitogen-activated protein kinase kinase kinase 7); Y105C5A.24 is involved in reproduction; Y105C5A.24 is predicted to have ATP binding activity and protein kinase activity, based on protein domain information.	190882	36	30	6	12.23	3.82	6.62e-05	0.0015	0.55	1	Y	Y
855	lev-1	WBGene00002974	lev-1	F09E8.7	F09E8.7a,F09E8.7b,F09E8.7a,F09E8.7b	-0.821581	2.96298	4.16717	3.60817	body wall musculature,dorsal nerve cord,nerve ring,ventral cord neuron,ventral nerve cord	N.A.	lev-1 encodes a non-alpha subunit of nicotinic acetylcholine receptor (nAChR) which, when mutated, confers resistance to levamisole; LEV-1 is required for completely normal locomotion, regulation of egg-laying behavior, and forms a cation channel when coexpressed with UNC-38 or UNC-63 and UNC-29; LEV-1 falls into the 'UNC-29' class of nAChR subunits, which includes UNC-29, ACR-2, and ACR-3; a LEV…	178269	40	30	10	12.92	3.82	6.62e-05	0.00149	0.34	0.74	N	N
856	F41C3.2	WBGene00018268	F41C3.2	F41C3.2	F41C3.2,F41C3.2:wp152,F41C3.2	5.28423	3.89637	-2.15174	-3.61342	body wall musculature,uterine muscle	adult Ce,adult hermaphrodite Ce,embryo Ce,fully-elongated embryo Ce,L1 larva Ce,L2 larva Ce,L3 larva Ce,L4 larva Ce	F41C3.2 is an ortholog of members of the human SLC (Solute carriers) family including SLC17A1; F41C3.2 is involved in cell development; F41C3.2 is expressed in the uterine muscle and the body wall musculature.	173821	45	30	15	13.73	3.82	6.71e-05	0.00151	1.6	1.01	Y	N
857	F40F9.10	WBGene00009586	F40F9.10	F40F9.10	F40F9.10,F40F9.10:wp193,F40F9.10	-2.65636	2.98357	1.67393	0.0286821	anal depressor muscle,body wall musculature,pharynx	adult Ce,larva Ce	F40F9.10 is an ortholog of human TRMT12 (tRNA methyltransferase 12); F40F9.10 is expressed in the pharynx, anal depressor muscle, and the body wall musculature.	179363	40	32	8	12.91	3.82	6.72e-05	0.00151	0.26	0	N	N
859	mup-4	WBGene00003497	mup-4	K07D8.1	K07D8.1,K07D8.1	7.09085	5.54215	3.66045	2.28228	body wall musculature,hypodermis,pharynx,seam cell,touch receptor neuron	3-fold embryo Ce,adult Ce,fully-elongated embryo Ce,larva Ce	The mup-4 gene encodes a novel transmembrane protein required for junctional attachments between hypodermis and muscle, and between the apical epithelial surface and the cuticular matrix.	176060	40	28	12	12.9	3.81	6.83e-05	0.00153	0.32	0.29	Y	N
860	trx-1	WBGene00015062	trx-1	B0228.5	B0228.5a,B0228.5b,B0228.5b,B0228.5a	-1.33263	-0.92195	1.27101	3.05986	ASJL,ASJR,head neuron,intestine	3-fold embryo Ce,adult Ce,embryo Ce,fully-elongated embryo Ce,L1 larva Ce,L2 larva Ce,L3 larva Ce,L4 larva Ce,larva Ce	trx-1 encodes a thioredoxin, a small redox protein that functions as a protein-disulfide reductase; loss of trx-1 activity via a deletion mutation and RNAi indicates that trx-1 is required for normal adult lifespan; in vitro, TRX-1 is capable of reducing protein disulfide bonds in the presence of a mammalian thioredoxin reductase; a TRX-1::GFP fusion protein is expressed in the ASJL/R amphid chem…	181863	31	27	4	11.29	3.81	6.93e-05	0.00155	0.55	0.13	N	N
861	sek-4	WBGene00018035	sek-4	F35C8.2	F35C8.2,F35C8.2:wp141,F35C8.2:wp221,F35C8.2	-3.72415	2.06221	-3.82902	-2.60129	N.A.	N.A.	sek-4 is an ortholog of human MAP2K7 (mitogen-activated protein kinase kinase 7), MAP2K3 (mitogen-activated protein kinase kinase 3) and MAP2K6 (mitogen-activated protein kinase kinase 6); sek-4 is predicted to have ATP binding activity and protein kinase activity, based on protein domain information.	180811	44	34	10	13.54	3.81	6.96e-05	0.00156	0.6	1.12	N	Y
862	T20D4.12	WBGene00020618	T20D4.12	T20D4.12	T20D4.12,T20D4.12:wp153,T20D4.12	-4.55702	0.756452	-1.04746	-0.719666	N.A.	N.A.	Microarray and RNA sequencing studies indicate that T20D4.12 is affected by Hydrogen sulfide, Ethanol, Tunicamycin, Resveratrol, Cry5B, Chlorpyrifos, Diazinon, adsorbable organic bromine compounds, and Sirolimus; tiling array and RNA sequencing studies indicate that T20D4.12 is enriched in the cephalic sheath cell, hypodermis, and muscle cell and in the dopaminergic, PVD, and OLL neurons.	188648	33	27	6	11.66	3.81	6.97e-05	0.00156	0.67	0.36	N	N
863	npr-26	WBGene00011372	npr-26	T02D1.6	T02D1.6a,T02D1.6b,T02D1.6c,T02D1.6:wp78,T02D1.6:wp245,T02D1.6a,T02D1.6c,T02D1.6b	-0.0175245	0.302233	-0.0238529	4.601	N.A.	N.A.	npr-26 is predicted to have G-protein coupled receptor activity, based on protein domain information.	24104836	27	22	5	10.5	3.81	7.01e-05	0.00157	0.52	0.29	N	N
864	nlp-11	WBGene00003749	nlp-11	ZK1320.10	ZK1320.10,ZK1320.10	7.18133	5.24886	5.64088	10.5921	head neuron,IL1 neuron,inner labial neuron,PVDL,PVDR,tail neuron,ventral cord neuron	bean embryo Ce,blastula embryo Ce,enclosing embryo Ce,gastrulating embryo Ce	nlp-11 is involved in lipid storage; nlp-11 is expressed in all inner labial neurons, all ventral cord neurons, head neurons, tail neurons, and certain mechanosensory neurons.	191566	44	30	14	13.52	3.8	7.1e-05	0.00158	0.11	0.15	N	N
865	ins-6	WBGene00002089	ins-6	ZK84.6	ZK84.6,ZK84.6	1.78306	2.15823	3.61803	7.39811	amphid neuron,ASIL,ASIR,ASJL,ASJR,coelomocyte,head muscle,head neuron,inner labial neuron,intestine,nerve ring,outer labial neuron,PVT,tail,tail neuron,uterus,ventral nerve cord	2-fold embryo Ce,adult Ce,dauer larva Ce,fully-elongated embryo Ce,L1 larva Ce,L1-L2 lethargus Ce,L2 larva Ce,L3 larva Ce,L4 larva Ce	ins-6 encodes predicted type-beta insulin-like molecule that lacks a C peptide domain; expressed throughout development and in some neurons beginning in the two-fold elongated embryo.	191687	31	24	7	11.27	3.8	7.12e-05	0.00159	0	1.17	N	N
866	F46G11.2	WBGene00018515	F46G11.2	F46G11.2	F46G11.2,F46G11.2:wp133,F46G11.2:wp142,F46G11.2	0.90074	2.09098	-0.943951	0.111587	N.A.	N.A.	Tiling array, microarray, and RNA sequencing studies indicate that F46G11.2 is affected by hpl-2, nhr-114, rsr-2, emr-1, lem-2, ubc-9, daf-2, dop-1, dpy-21, dpy-10, crh-1, octr-1, nhr-23, oga-1, and pmk-1; RNA sequencing and microarray studies indicate that F46G11.2 is affected by D-glucose, single-walled carbon nanotubes, Dafa#1, and Sirolimus; tiling array and RNA sequencing studies indicate th…	185878	29	25	4	10.89	3.8	7.12e-05	0.00159	0.33	1.12	N	N
867	F46C5.1	WBGene00009778	F46C5.1	F46C5.1	F46C5.1,F46C5.1	7.66359	0.73966	-0.201876	-2.87493	N.A.	N.A.	Microarray and RNA sequencing studies indicate that F46C5.1 is affected by Hydrogen sulfide, 1-methylnicotinamide, Rotenone, Ethanol, Acrylamide, Atrazine, Diazinon, Cry5B, single-walled carbon nanotubes, and Sirolimus; tiling array and microarray studies indicate that F46C5.1 is enriched in the intestine and in neurons including the DA and VA neurons.	174411	45	30	15	13.67	3.8	7.21e-05	0.0016	0.32	1.86	Y	N
868	C46E1.3	WBGene00008116	C46E1.3	C46E1.3	C46E1.3,C46E1.3	-0.879344	-0.43074	-3.17578	-0.94704	amphid sheath cell,excretory canal	N.A.	C46E1.3 is predicted to have GTP binding activity, based on protein domain information; C46E1.3 is expressed in the excretory canal and the amphid sheath cell.	181635	8	8	0	5.62	3.8	7.23e-05	0.00161	0	0.23	N	N
870	zyx-1	WBGene00006999	zyx-1	F42G4.3	F42G4.3a,F42G4.3b,F42G4.3c,F42G4.3d,F42G4.3e,F42G4.3b:wp229,F42G4.3e.1,F42G4.3e.2,F42G4.3a.1,F42G4.3a.2,F42G4.3c,F42G4.3d,F42G4.3b	7.48081	6.87232	9.06117	7.46187	anal sphincter muscle,body wall musculature,head neuron,intestine,muscle cell,nervous system,neuron,pharynx,reproductive system,spermatheca,vulva,vulval muscle	adult Ce,larva Ce	zyx-1 encodes a LIM domain protein and is most similar to vertebrate Zyxin; the vertebrate zyxin sub-family also includes migfilin, TRIP6 and LPP; the ZYX-1 protein is expressed in striated body wall muscle and localizes at dense bodies/Z-discs and in the nucleus; ZYX-1 physically interacts with P granule components (GLH proteins) and several dense body and M-line proteins, including DEB-1 (Vincu…	174951	22	17	5	9.42	3.8	7.36e-05	0.00163	0.21	0	Y	N
871	sto-1	WBGene00006063	sto-1	F08C6.4	F08C6.4a,F08C6.4b,F08C6.4:wp176,F08C6.4b,F08C6.4a	3.22785	3.32293	3.83048	2.14411	head neuron,nerve ring,nervous system,pharynx,tail neuron	larva Ce	sto-1 is expressed in the pharynx and the nervous system.	181017	44	35	9	13.49	3.8	7.37e-05	0.00163	0	0.92	N	N
872	Y43B11AR.1	WBGene00021543	Y43B11AR.1	Y43B11AR.1	Y43B11AR.1,Y43B11AR.1:wp154,Y43B11AR.1	7.48276	4.38094	5.52927	7.14241	N.A.	N.A.	RNA sequencing and microarray studies indicate that Y43B11AR.1 is affected by eat-2, hsf-1, let-418, chd-3, daf-2, tdp-1, and nuo-6; RNA sequencing and microarray studies indicate that Y43B11AR.1 is affected by Rotenone, Manganese chloride, Atrazine, Cadmium, Chlorpyrifos, Diazinon, Hydrolyzable Tannins, Humic substances, and Paraquat; tiling array and RNA sequencing studies indicate that Y43B11A…	189846	22	18	4	9.42	3.79	7.39e-05	0.00163	0.15	0.17	N	N
873	F55G1.7	WBGene00018903	F55G1.7	F55G1.7	F55G1.7a,F55G1.7b,F55G1.7c,F55G1.7d,F55G1.7:wp208,F55G1.7b,F55G1.7a,F55G1.7c,F55G1.7d	0.274132	-1.36337	-1.28298	-3.52041	N.A.	N.A.	Microarray, tiling array, and RNA sequencing studies indicate that F55G1.7 is affected by cyc-1, lin-35, hpl-2, tatn-1, puf-8, daf-2, mes-6, chd-3, elli-1, eri-1, fbf-1, mir-243, ain-2, oga-1, and pmk-1; microarray studies indicate that F55G1.7 is affected by Quercetin and Humic substances; tiling array, RNA sequencing, and microarray studies indicate that F55G1.7 is enriched in the cephalic shea…	186328	44	31	13	13.49	3.79	7.4e-05	0.00163	0.61	2.53	N	Y
874	T19D2.2	WBGene00004184	T19D2.2	T19D2.2	T19D2.2,T19D2.2.1,T19D2.2.2	4.22551	4.57621	5.80582	6.24014	N.A.	N.A.	T19D2.2 is an ortholog of human PTP4A2 (protein tyrosine phosphatase type IVA, member 2), PTP4A3 (protein tyrosine phosphatase type IVA, member 3) and PTP4A1 (protein tyrosine phosphatase type IVA, member 1); T19D2.2 is involved in lipid storage and secretion by cell; T19D2.2 is predicted to have protein tyrosine phosphatase activity, based on protein domain information.	180677	34	29	5	11.79	3.79	7.4e-05	0.00163	0.26	0	N	N
875	cpt-3	WBGene00021703	cpt-3	Y48G9A.10	Y48G9A.10,Y48G9A.10:wp104,Y48G9A.10:wp130,Y48G9A.10	1.1917	-3.59392	-5.55372	-4.71484	N.A.	N.A.	cpt-3 is predicted to have transferase activity, transferring acyl groups, based on protein domain information.	190055	35	26	9	11.97	3.79	7.43e-05	0.00164	0.68	1.79	N	N
876	C49F5.7	WBGene00008211	C49F5.7	C49F5.7	C49F5.7,C49F5.7:wp83,C49F5.7	7.6583	4.35488	5.47069	3.72196	N.A.	N.A.	Microarray and RNA sequencing studies indicate that C49F5.7 is affected by Methylmercuric chloride, Rotenone, Manganese chloride, D-glucose, Bisphenol A, Ethanol, Resveratrol, Hydrolyzable Tannins, Humic substances, and Sirolimus; tiling array, RNA sequencing, and microarray studies indicate that C49F5.7 is enriched in the hypodermis, germ line, and intestine and in the NSM neurons.	183615	45	34	11	13.64	3.79	7.46e-05	0.00164	0.12	0.59	N	N
877	cal-4	WBGene00000288	cal-4	T07G12.1	T07G12.1a,T07G12.1b,T07G12.1c,T07G12.1a,T07G12.1b,T07G12.1c	3.0534	2.38348	3.31269	6.82403	anal depressor muscle,body wall musculature,reproductive system,vulva,vulval muscle	adult Ce,larva Ce	cal-4 encodes one of five predicted C. elegans calcium-binding calmodulin homologs (the others being CAL-1, CAL-2, CAL-3 and CMD-1); as loss of cal-4 function via RNA-mediated interference (RNAi) does not result in any abnormalities, the precise role of CAL-4 in C. elegans development and/or behavior is not yet known.	177945	36	29	7	12.14	3.79	7.49e-05	0.00165	1.05	0.53	N	N
878	H18N23.2	WBGene00019211	H18N23.2	H18N23.2	H18N23.2a,H18N23.2b,H18N23.2c,H18N23.2b:wp108,H18N23.2b,H18N23.2a,H18N23.2c	7.04832	4.56012	6.06203	5.38822	N.A.	N.A.	H18N23.2 is an ortholog of human PPP1R3B (protein phosphatase 1 regulatory subunit 3B) and PPP1R3C (protein phosphatase 1 regulatory subunit 3C); H18N23.2 is involved in embryo development.	181788	42	31	11	13.15	3.79	7.5e-05	0.00165	0	1.15	Y	N
880	best-24	WBGene00022797	best-24	ZK688.2	ZK688.2,ZK688.2	5.48647	2.65504	1.94411	1.38043	head neuron,hypodermis,intestine,nervous system	adult Ce,larva Ce	best-24 is an ortholog of human Best4 (bestrophin 4), Best3 (bestrophin 3), Best2 (bestrophin 2) and Best1 (bestrophin 1); best-24 is involved in locomotion and positive regulation of growth; best-24 is expressed in the hypodermis, nervous system, and the intestine.	176110	42	28	14	13.15	3.79	7.52e-05	0.00165	0.41	0.27	Y	N
881	Y54G2A.36	WBGene00021898	Y54G2A.36	Y54G2A.36	Y54G2A.36,Y54G2A.36.1,Y54G2A.36.2,Y54G2A.36.3,Y54G2A.36.4	1.87551	1.49932	0.658489	0.798392	N.A.	N.A.	RNA sequencing studies indicate that Y54G2A.36 is affected by Manganese chloride; RNA sequencing studies indicate that Y54G2A.36 is enriched in the germ line, gon_male_dtc posterior, gon_male_dtc anterior, Z1.p, and Z4.a.	3565378	22	17	5	9.39	3.78	7.76e-05	0.0017	0.29	0.29	N	N
882	saeg-1	WBGene00010012	saeg-1	F53H10.2	F53H10.2a,F53H10.2b,F53H10.2c,F53H10.2d,F53H10.2:wp90,F53H10.2d,F53H10.2a,F53H10.2b,F53H10.2c	7.11148	4.87977	5.84046	7.45582	N.A.	N.A.	saeg-1 is an ortholog of human ELMSAN1 (ELM2 and Myb/SANT domain containing 1), ZNF541 (zinc finger protein 541) and TRERF1 (transcriptional regulating factor 1); saeg-1 is involved in gene expression; saeg-1 is predicted to have DNA binding activity, based on protein domain information; saeg-1 is localized to the nucleus.	179505	45	33	12	13.57	3.77	8.08e-05	0.00177	0	0.12	N	N
883	T03F6.3	WBGene00011399	T03F6.3	T03F6.3	T03F6.3,T03F6.3	5.50156	4.12579	4.26568	2.49324	arcade cell,intestine,nervous system,reproductive system,tail,vulva	adult Ce,larva Ce	T03F6.3 is an ortholog of human GNPDA2 (glucosamine-6-phosphate deaminase 2) and GNPDA1 (glucosamine-6-phosphate deaminase 1); T03F6.3 is predicted to have glucosamine-6-phosphate deaminase activity, based on protein domain information; T03F6.3 is expressed in the nervous system, tail, reproductive system, intestine, and the arcade cell.	176760	44	36	8	13.39	3.77	8.25e-05	0.0018	1.07	0.97	Y	Y
884	ptr-14	WBGene00004228	ptr-14	R09H10.4	R09H10.4,R09H10.4	3.2301	3.19514	0.441932	0.159153	N.A.	N.A.	ptr-14 encodes a nematode-specific member of the sterol sensing domain (SSD) proteins, distantly paralogous to Drosophila PATCHED (PTC) and human PTCH (OMIM:601309, mutated in basal cell nevus syndrome); PTR-14 is weakly required for normal molting from L4 to adult stages; PTR-14 is also required for normal growth to full size and locomotion.	177951	31	22	9	11.16	3.77	8.26e-05	0.0018	1.11	0.41	Y	N
885	dmd-6	WBGene00007058	dmd-6	F13G11.1	F13G11.1b,F13G11.1c,F13G11.1d,F13G11.1a:wp229,F13G11.1b.1,F13G11.1b.2,F13G11.1b.3,F13G11.1c.1,F13G11.1c.2,F13G11.1d	7.24552	5.40328	6.09598	6.84442	body wall musculature,head,head neuron,hypodermis,intestine,muscle cell,nerve ring neuron,neuron,pharynx,rectum,reproductive system,tail,tail neuron,ventral cord neuron,vulva	N.A.	dmd-6 is an ortholog of human DMRT2 (doublesex and mab-3 related transcription factor 2), DMRT3 (doublesex and mab-3 related transcription factor 3), DMRTA2 (DMRT like family A2), DMRTC1B (DMRT like family C1B), DMRTC2 (DMRT like family C2), DMRTB1 (DMRT like family B with proline rich C-terminal 1) and DMRTA1 (DMRT like family A1); dmd-6 is predicted to have sequence-specific DNA binding activit…	178392	32	21	11	11.35	3.77	8.27e-05	0.0018	0	0	Y	N
886	F08G2.5	WBGene00008577	F08G2.5	F08G2.5	F08G2.5,F08G2.5	-1.46851	5.44161	-1.80804	-1.7692	N.A.	N.A.	F08G2.5 is involved in innate immune response.	184201	39	29	10	12.58	3.77	8.28e-05	0.0018	0.61	1	Y	Y
887	T19C9.8	WBGene00011844	T19C9.8	T19C9.8	T19C9.8,T19C9.8:wp214,T19C9.8	2.24948	1.61145	-4.61455	-1.44748	N.A.	N.A.	T19C9.8 is an ortholog of human EPHX1 (epoxide hydrolase 1); microarray and RNA sequencing studies indicate that T19C9.8 is affected by Heme, Tryptophan, Methylmercury hydroxide, 1-methylnicotinamide, D-glucopyranose, Bisphenol A, Acrylamide, Chlorpyrifos, Diazinon, Cry5B, Quercetin, Humic substances, single-walled carbon nanotubes, Paraquat, Colistin, adsorbable organic bromine compounds, and Si…	180142	36	25	11	12.06	3.77	8.29e-05	0.0018	0.34	0.45	N	N
888	nlp-21	WBGene00003759	nlp-21	Y47D3B.2	Y47D3B.2a,Y47D3B.2b,Y47D3B.2b,Y47D3B.2a	5.10464	5.83158	5.51242	10.0916	AFDL,AFDR,AS neuron,body wall musculature,DA neuron,DB neuron,dorsal nerve cord,head neuron,intestine,neuron,pharyngeal neuron,tail neuron,VA neuron,VB neuron	embryo Ce,larva Ce	nlp-21 encodes nine predicted neuropeptide-like proteins; in C. elegans, nlp-21 is part of the GGARAF neuropeptide family that also contains nlp-9; nlp-21 is expressed in a variety of neurons, including AFD, five head neurons, the ventral nerve cord, one anterior pharyngeal neuron, and one tail neuron; nlp-21 expression is also detected in the embryo and the intestine; NLP-21 is tranported by den…	176570	39	27	12	12.57	3.76	8.34e-05	0.00181	1.29	0	N	N
889	best-3	WBGene00015286	best-3	C01B12.3	C01B12.3,C01B12.3	1.85094	1.41406	-0.905162	-4.05949	anal depressor muscle,excretory cell,hypodermis,reproductive system,spermatheca	adult Ce,larva Ce	C01B12.3 is orthologous to the human gene VITELLIFORM MACULAR DYSTROPHY PROTEIN (VMD2; OMIM:153700), which when mutated leads to disease.	173379	36	24	12	12.06	3.76	8.35e-05	0.00181	0.26	0.28	Y	N
890	sulp-2	WBGene00017464	sulp-2	F14D12.5	F14D12.5,F14D12.5	3.80478	-0.0398622	-0.266045	1.69461	ADEL,ADER,CEPDL,CEPDR,CEPVL,CEPVR,intestine,PDEL,PDER	N.A.	sulp-2 encodes one of eight C. elegans members of the sulfate permease family of anion transporters; by homology, SULP-2 is predicted to function as an anion transporter that regulates cellular pH and volume via transmembrane movement of electrolytes and fluids and when expressed in Xenopus oocytes, SULP-2 does exhibit modest uptake of sulfate; a SULP-2::GFP fusion is expressed in the intestine a…	180828	40	29	11	12.73	3.76	8.41e-05	0.00182	0.33	1.72	N	Y
891	hot-5	WBGene00001990	hot-5	K07A12.6	K07A12.6,K07A12.6	-1.97027	1.0496	2.31019	4.12582	N.A.	N.A.	hot-5 encodes a predicted membrane-associated protein that is a member of the Ly-6 superfamily of glycosylphosphatidylinositol (GPI)-linked signaling proteins and is homologous to ODR-2, a neuronally expressed protein required for olfaction; as loss of hot-5 activity via RNA-mediated interference (RNAi) does not result in any abnormalities, the precise role of HOT-5 in C. elegans development and/…	172671	40	28	12	12.72	3.76	8.46e-05	0.00183	0.83	0.36	N	N
893	F43C11.7	WBGene00018384	F43C11.7	F43C11.7	F43C11.7,F43C11.7	2.75816	1.48793	-2.17028	0.613863	N.A.	N.A.	F43C11.7 is an ortholog of human FSD2 (fibronectin type III and SPRY domain containing 2), RFPL3 (ret finger protein like 3), RFPL4AL1 (ret finger protein like 4A like 1), Mid1 (midline 1) and TRIML2 (tripartite motif family like 2) and members of the TRIM (Tripartite motif containing) family including TRIM38 and RNF (Ring finger proteins) family including TRIML1; F43C11.7 is involved in defense …	173591	42	30	12	13.03	3.75	8.71e-05	0.00188	0.34	1.27	N	Y
895	Y39H10A.1	WBGene00021478	Y39H10A.1	Y39H10A.1	Y39H10A.1,Y39H10A.1	1.25478	-1.15673	-4.0303	-3.40428	N.A.	N.A.	Microarray, tiling array, and RNA sequencing studies indicate that Y39H10A.1 is affected by daf-16, nhr-114, rsr-2, prg-1, clk-1, daf-2, npr-1, cec-4, sir-2.1, tdp-1, his-24, hpl-1, hpl-2, and nhr-25; microarray and RNA sequencing studies indicate that Y39H10A.1 is affected by Mercuric Chloride and Multi-walled carbon nanotubes; tiling array and RNA sequencing studies indicate that Y39H10A.1 is e…	178793	36	25	11	12.02	3.75	8.76e-05	0.00189	1.05	0.13	N	N
896	F09E10.7	WBGene00017297	F09E10.7	F09E10.7	F09E10.7a,F09E10.7c,F09E10.7:wp102,F09E10.7b:wp244,F09E10.7b,F09E10.7a,F09E10.7c	0.706098	2.5088	2.37837	6.68938	N.A.	N.A.	Microarray and RNA sequencing studies indicate that F09E10.7 is affected by cyc-1, age-1, tatn-1, prg-1, htz-1, lin-35, bar-1, daf-16, jmjd-1.2, rbr-2, dpy-21, sir-2.1, lin-54, daf-2, tbx-2, isp-1, and nuo-6; RNA sequencing and microarray studies indicate that F09E10.7 is affected by Rotenone, D-glucose, and Sirolimus; tiling array, RNA sequencing, and microarray studies indicate that F09E10.7 is…	180488	41	30	11	12.86	3.75	8.77e-05	0.00189	0.26	0	N	N
897	F01G4.6	WBGene00008505	F01G4.6	F01G4.6	F01G4.6a,F01G4.6b,F01G4.6a.1,F01G4.6a.2,F01G4.6a.3,F01G4.6b.1,F01G4.6b.2,F01G4.6b.3	10.551	8.87498	9.86834	8.70509	body wall musculature,intestine,pharynx	adult Ce,larva Ce	F01G4.6 is an ortholog of human SLC25A3 (solute carrier family 25 member 3); F01G4.6 is involved in embryo development, hermaphrodite genitalia development and nematode larval development; F01G4.6 is expressed in the pharynx, intestine, and the body wall musculature.	178020	36	26	10	12.02	3.75	8.81e-05	0.00189	0.29	0.89	Y	Y
898	B0207.2	WBGene00015027	B0207.2	B0207.2	B0207.2,B0207.2	-0.189634	1.73426	0.294442	4.68647	N.A.	N.A.	Microarray and RNA sequencing studies indicate that B0207.2 is affected by cyc-1, emr-1, lem-2, hsf-1, ain-2, and lin-35; microarray studies indicate that B0207.2 is affected by Cadmium; tiling array, RNA sequencing, and microarray studies indicate that B0207.2 is enriched in neurons including the dopaminergic and AFD neurons.	181835	36	27	9	12.01	3.75	8.89e-05	0.00191	0.85	0.13	N	N
899	F45D3.2	WBGene00009722	F45D3.2	F45D3.2	F45D3.2a,F45D3.2b,F45D3.2:wp142,F45D3.2b,F45D3.2a	3.39588	3.96081	3.06081	6.18252	body wall musculature	N.A.	F45D3.2 is expressed in the body wall musculature.	179716	37	25	12	12.18	3.75	8.91e-05	0.00191	0.26	0	Y	N
[truncated: 2,217 more rows]

## Sheet: Class I
Rank	Gene	WormBase Gene ID	Public Name	Sequence Name	Transcript	hypodermis	intestine	muscle	neurons	Expr_pattern Tissue	Expr_pattern LifeStage	Description Text	entrez	Available Experiments	Experiments Up	Experiments Down	Voting Score	t-value	p-value	FDR	DBE PSAM Affinity	DAE PSAM Affinity	DAF-16 ChIP-seq Hit	PQM-1 ChIP-seq Hit
[truncated: 1,435 more rows]

[truncated: 1 more sheets: Class II]
